# Supplementary material
Source: publisher figshare collection journal article supplement (https://wellcome.figshare.com/ndownloader/files/4851001)
Supplement: Supplementary file 1 [file 4851001]

## Sheet: Processed_combined 2014 2015 AP
PMCID	PMID	DOI	Publisher	Journal title	ISSN	Article title	Cost (£) (inc VAT when charged)	Fulltext in Europe PMC?	Early View? Yes/No	Date first published online (only where yes to early view)	Accepted author manuscript?	Licence	Licence Source	Journal Type	COAF compliant?	Funder of research (1)	Funder of research (2)	Funder of research (3)	Grant ID (1)	Grant ID (2)	Grant ID (3)
PMC4338795	25737818	10.7717/peerj.778	PeerJ	PeerJ	2167-8359	Computational analysis of the LRRK2 interactome	169.58	TRUE			FALSE	cc-by	epmc_xml	oa	TRUE	Wellcome Trust	MRC		WT089698	MR/L010933/1
PMC4260042	25538684	10.3389/fendo.2014.00208	Frontiers	Frontiers in Endocrinology: Bone Research	1664-2392	A new method to investigate how mechanical loading of osteocytes controls osteoblasts	177.34	TRUE			FALSE	cc-by	epmc_xml	oa	TRUE							checked
PMC4548472	26312183	10.7717/peerj.1192	PeerJ	PeerJ	2167-8359	Perivascular mast cells regulate vein graft neointimal formation and remodeling	178.3	TRUE			FALSE	cc-by	epmc_xml	oa	TRUE	British Heart Foundation			BHF/PG/09/095		0
PMC4467903	26089745	10.1021/ct501111d	American Chemical Society	Journal of Chemical Theory and Computation	1549-9618, 1549-9626	Alchembed: A Computational Method for Incorporating Multiple Proteins into Complex Lipid Geometries	198.06	TRUE			FALSE	cc-by	epmc_xml	hybrid	TRUE	Wellcome Trust				092970/z/10/z		checked
PMC4616909	26085597	10.1177/0961203315591031	SAGE	Lupus	0961-2033, 1477-0962	Drug-like analogues of the parasitic worm-derived immunomodulator ES-62 are therapeutic in the MRL/Lpr model of systemic lupus erythematosus	200	TRUE			FALSE	cc-by	epmc_xml	hybrid	TRUE	Wellcome Trust			86852
PMC4263820	25500864	10.1177/0954411914559737	Sage	Proceedings of the Institution of Mechanical Engineers, Part H: Journal of Engineering in Medicine	0954-4119, 2041-3033	Computational Investigation of the Time-dependent Contact Behaviour of the Human Tibiofemoral Joint under Body Weight	240	TRUE			FALSE	cc-by	epmc_xml	hybrid	TRUE	EPSRC	WELMEC	0	EP/G012172/1	WT 088908/Z/09/Z	0
PMC4639754	26261188	10.1177/1403494815597582	Sage	Scandinavian Journal of Public Health	1403-4948, 1651-1905	Anthropometric trends and the risk of cardiovascular disease mortality in a Lithuanian urban population aged 45â€“64 years	240	TRUE			FALSE	cc-by	epmc_xml	hybrid	TRUE	Wellcome Trust			081081/Z/06/Z
PMC4564765	26435577	10.1177/0891243215590101	SAGE	Gender and Society	0891-2432	Re-visioning Ultrasound through Womenâ€™s Accounts of Pre-abortion Care in England	240	TRUE			FALSE	cc-by	epmc_xml	hybrid	TRUE	Wellcome Trust	0	0	095720/Z/11/Z	0	0
PMC4353373	25806366	10.3389/fbioe.2015.00026	Frontiers	Frontiers in Bioengineering and Biotechnology	2296-4185	Enhanced acylcarnitine annotation in high-resolution mass spectrometry data: fragmentation analysis for the classification and annotation of acylcarnitines	255.89	TRUE			FALSE	cc-by	epmc_xml	oa	TRUE	Wellcome Trust			097821/Z/11/B			checked
PMC4309860	25498966	10.1016/j.redox.2014.11.005	Elsevier	Redox Biology	2213-2317	A novel role for 12/15-lipoxygenase in regulating autophagy.	286.42	TRUE			FALSE	cc-by	epmc_xml	oa	TRUE	Wellcome Trust			094143/Z/10/Z			checked
PMC4583527	26316295	10.3892/ijo.2015.3139	Spandidos Publications	International Journal of Oncology	1019-6439, 1791-2423	FoxM1 is over-expressed in B-acute lymphoblastic leukemia (B-All) and its inhibition sensitizes B-All cells to chemotherapeutic drugs	382	TRUE			FALSE	cc-by	epmc_xml	hybrid	TRUE	CRUK			C37/A12011
PMC4382075	25721181	10.1016/j.jaac.2014.12.010	Elsevier	Journal of the American Academy of Child and Adolescent Psychiatry	0890-8567, 1527-5418	Cognitive Training for Attention-Deficit/Hyperactivity Disorder: Meta-Analysis of Clinical and Neuropsychological Outcomes From Randomized Controlled Trials	385.72	TRUE			FALSE	cc-by	epmc_xml	hybrid	TRUE	Wellcome Trust			WT093909			checked
PMC4554298	26237203	10.1021/acsami.5b05228	ACS	ACS Applied Materials & Interfaces	1944-8244, 1944-8252	Terminal PEGylated DNAâ€“Gold Nanoparticle Conjugates Offering High Resistance to Nuclease Degradation and Efficient Intracellular Delivery of DNA Binding Agents	386.95	TRUE			FALSE	cc-by	epmc_xml	hybrid	TRUE	Wellcome Trust	0	0	097354/Z/11/Z	0	0
PMC4674743	25663247	10.1177/0956462415571671	Sage	International Journal of STD and AIDS	0956-4624, 1758-1052	Two Cases of Transmitted Drug Resistant HIV Virus: HIV superinfection and Unmasking of Pre-existing Resistance	400	TRUE			FALSE	cc-by	epmc_xml	hybrid	TRUE	Wellcome Trust			WT102789
PMC4217485	25404913	10.3389/fncom.2014.00137	Frontiers	Frontiers in Computational Neuroscience	1662-5188	OpenWorm: an open-science approach to modelling Caenorhabditis elegans	434.7	TRUE			FALSE	cc-by	epmc_xml	oa	TRUE	Wellcome Trust	EPSRC / BBSRC / MRC		101445	EP/F500385/1 and BB/F529254/1
PMC4294210	25642219	10.3389/fmicb.2014.00783	Frontiers Media SA	Frontiers in Microbiology	1664-302X	Interaction between extracellular matrix molecules and microbial pathogens: evidence for the missing link in autoimmunity with rheumatoid arthritis as a disease model	464.64	TRUE			FALSE	cc-by	epmc_xml	oa	TRUE	WT
PMC4466098	26097433	10.1177/1477750914558550	Sage	Clinical Ethics	1477-7509, 1758-101X	IEEN workshop report: professionalism in interdisciplinary and empirical bioethics	480	TRUE			FALSE	cc-by	epmc_xml	hybrid	TRUE	Wellcome Trust	0	0	096577/Z/11/Z	0	0
PMC4469542	26097432	10.1177/1477750913499493	Sage	Clinical Ethics	1477-7509, 1758-101X	IEEN workshop report: Teaching and Learning in Interdisciplinary and Empirical Ethics	480	TRUE			FALSE	cc-by	epmc_xml	hybrid	TRUE	Wellcome Trust	0	0	096577/Z/11/Z	0	0
PMC4456430	25767149	10.1177/0954411915570372	Sage	Proceedings of the Institution of Mechanical Engineers, Part H: Journal of Engineering in Medicine	0954-4119, 2041-3033	Variation in viscoelastic properties of bovine articular cartilage below, up to and above healthy-gait relevant loading frequencies	480	TRUE			FALSE	cc-by	epmc_xml	hybrid	TRUE	Arthritis Research UK	0	0	H0671	0	0
PMC4007766	24317296	10.1242/jcs.137463	Company of Biologists	Journal of Cell Science	0021-9533, 1477-9137	ICAM-2 facilitates luminal interactions between neutrophils and endothelial cells in vivo	480	TRUE			FALSE	cc-by	epmc_xml	hybrid	TRUE	Wellcome Trust			098291/Z/12/Z
PMC4419855	25999807	10.3389/fnins.2015.00156	Frontiers	Frontiers in Neuroscience	1662-4548, 1662-453X	The Blood-Brain Barrier and Methamphetamine: Open Sesame?	491.625	TRUE			FALSE	cc-by	epmc_xml	oa	TRUE	British Heart Foundation			Phd Fellowship
PMC4422874	0	10.1177/0003489414565003	Sage	Annals of Otology, Rhinology & Laryngology	0003-4894, 1943-572X	How reliable are sino nasal cell line for studying the pathophysiology of chronic rhinosinusitis?	494.89	TRUE			FALSE	cc-by	epmc_xml	hybrid	TRUE	Wellcome Trust	0	0	100201/Z/12/Z	0	0
PMC4390285	25853246	10.1371/journal.pone.0122673	CURATIO International Foundation	PLOS One	1932-6203	Health service utilization for mental, behavioral and emotional problems among conflict-affected population in Georgia: a cross-sectional study.	500	TRUE			FALSE	cc-by	epmc_xml	oa	TRUE	Wellcome Trust			WT093562/Z/10/Z
PMC4591359	26426329	10.1371/journal.pone.0139319	PLOS	PLOS One	1932-6203	Concurrent Relations Between Face Scanning and Language: A cross-syndromw Infant Study	503.5	TRUE			FALSE	cc-by	epmc_xml	oa	TRUE	Wellcome Trust	Other	0	098330/Z/12/Z	0	0
PMC4358641	25780755	10.7717/peerj.785	PeerJ	PeerJ	2167-8359	Body composition in Nepalese children using isotope dilution: the production of ethnic-specific calibration equations and an exploration of methodological issues	509.35	TRUE			FALSE	cc-by	epmc_xml	oa	TRUE	Wellcome Trust			092121/Z/10/Z
PMC4476844	25431483	10.1093/rheumatology/keu445		Rheumatology	1462-0324, 1462-0332	Necrotizing and crescentic glomerulonephritis presenting with preserved renal function in patients with underlying multisystem autoimmune disease: a retrospective case series	525	TRUE			FALSE	cc-by	epmc_xml	hybrid	TRUE	MRC/Wellcome Trust			G0901997/1; 097882/Z/11/Z
PMC4314782	25510503	10.1242/dmm.017285	Smart Science and Technology	Inflamation and Cell Signalling	1754-8403, 1754-8411	HIF-1?, a novel piece in the NF-?B puzzle	529.38	TRUE			FALSE	cc-by	epmc_xml	oa	TRUE	Wellcome Trust	CRUK			C99667/A12918	097945/B/11/Z
PMC4313718	25699041	10.3389/fimmu.2015.00018	Frontiers	Frontiers in Immunology	1664-3224	The genetic regulation of infant immune responses to vaccination	539.62	TRUE			FALSE	cc-by	epmc_xml	oa	TRUE	Wellcome Trust			WTBSCGHR (WT #100715) and WT #061174
PMC4409085	25999784	10.1080/14461242.2015.1008537	Taylor & Francis	Health Sociology Review	1446-1242	Locating and applying sociological theories of risk-taking to develop public health interventions for adolescents	540	TRUE			FALSE	cc-by	epmc_xml	hybrid	TRUE	ESRC	Wellcome Trust	British Heart Foundation	RES-590-28-0005	WT087640MA
PMC4337687	25745355	10.1080/14636778.2014.999153	Taylor & Francis	New Genetics and Society	1463-6778, 1469-9915	Origin stories from a regional placenta tissue collection	540	TRUE			FALSE	cc-by	epmc_xml	hybrid	TRUE	Wellcome Trust			WT100698/Z/12/Z
PMC4536936	26339278		Taylor & Francis	Vulnerable Children and Youth Studies	1745-0128, 1745-0136	Migration as a risk factor for school drop-out amongst children made vulnerable by HIV/AIDS: a prospective study in eastern Zimbabwe	540	TRUE			FALSE	cc-by	epmc_xml	hybrid	TRUE	WT			069516/Z/02/Z
PMC4235430	25477880	10.3389/fimmu.2014.00590.	Frontiers Media	Frontiers in Immunology	1664-3224	Metabolic regulation of regulatory T cell development and function	547.33	TRUE			FALSE	cc-by	epmc_xml	oa	TRUE	British Heart Foundation			RG/14/2/30616
PMC4197737	25360088	10.3389/fnsys.2014.00195	Frontiers	Frontiers in Systems Neuroscience	1662-5137	Cognitive biases can affect moral intuitions about cognitive enhancement	553.45	TRUE			FALSE	cc-by	epmc_xml	oa	TRUE	Wellcome Trust				86041
PMC4270184	25566011	10.3389/fnhum.2014.00953	Frontiers	Frontiers in Human Neuroscience	1662-5161	Brain stimulation for treatment and enhancement in children: an ethical analysis	554.92	TRUE			FALSE	cc-by	epmc_xml	oa	TRUE	Wellcome Trust				86041
PMC4201149	25368604	10.3389/fendo.2014.00174	Frontiers	Frontiers in Endocrinology: Bone Research	1664-2392	Deletion of P58IPK, the cellular inhibitor of the protein kinases PKR and PERK, causes bone changes and joint degeneration in mice	565.64	TRUE			FALSE	cc-by	epmc_xml	oa	TRUE
PMC4427162	25945706	10.1107/S2053230X15000990	International Union of Crystallography	Acta Cryst F	2053-230X	The structure of tubulin-binding cofactor A from Leishmania major infers a mode of association during the early stages of microtubule assembly	611.74	TRUE			FALSE	cc-by	epmc_xml	hybrid	TRUE	Wellcome Trust				82596	94090
PMC4427169	25945713	10.1107/S2053230X15003040	International Union of Crystallography	Acta Cryst F	2053-230X	Identification and structure solution of fragment hits against kinetoplastid N-myristoyltransferase	624.48	TRUE			FALSE	cc-by	epmc_xml	hybrid	TRUE	Wellcome Trust				077705/
PMC4318195	25627033	10.1186/s12936-015-0541-6	BioMed Central	Malaria Journal	1475-2875	Increased sample volume and use of quantitative reverse-transcription PCR can improve prediction of liver-to-blood inoculum size in controlled human malaria infection studies	655.2	TRUE			FALSE	cc-by	epmc_xml	oa	TRUE	Wellcome Trust				0907940/Z/11/Z
PMC4381624	25883556	10.3389/fnint.2015.00021	Frontiers	Frontiers in Integrative Neuroscience	1662-5145	Area V5 - A Microcosm of the visual brain	658.35	TRUE			FALSE	cc-by	epmc_xml	oa	TRUE	Wellcome Trust
PMC4366647	25852515	10.3389/fnhum.2015.00125	Frontiers	Frontiers in Human Neuroscience	1662-5161	Solving the detour problem in navigation: A model of prefrontal and hippocampal interactions	658.35	TRUE			FALSE	cc-by	epmc_xml	oa	TRUE	Wellcome Trust			094859/Z/10/Z
PMC4405644	26036203	10.1302/2046-3758.46.2000318	British Editorial Society of Bone and Joint Surgery	Bone and Joint Research	0270-7306, 1098-5549	Meniscal Transplantation and Its Effect on Osteoarthritis Risk â€“ an abridged protocol for the MeTEOR study	660	TRUE			FALSE	cc-by	epmc_xml	hybrid	TRUE	Arthritis Research UK			20149
PMC4649683	26450640	10.1302/2046-3758.410.2000420	British Editorial Society of Bone and Joint Surgery	Bone and Joint Research	2046-3758	Patientsâ€™ decision making in total knee arthroplasty â€“ a systematic review of qualitative research	660	TRUE			FALSE	cc-by	epmc_xml	oa	TRUE	Arthritis Research U.K.			20596
PMC4330887	25741255	10.3389/fnbeh.2015.00026	Frontiers	Frontiers in Behavioral Neuroscience	1662-5153	Motion and emotion: depression reduces psychomotor performance and alters affective movements in caregiving interactions	663.05	TRUE			FALSE	cc-by	epmc_xml	oa	TRUE	Wellcome Trust				90139
PMC4505102	0	10.3389/fnbeh.2015.00186	Frontiers	Frontiers in Behavioural Neuroscience	1662-5153	Deafferented controllers: a fundamental failure mechanism in cortical neuroprosthetic systems	676.2	TRUE			FALSE	cc-by	epmc_xml	oa	TRUE	Wellcome Trust	0	0	101002/Z/13/Z	0	0
PMC4455734	25615867	10.1107/S1399004714025280	International Union of Crystallography	ActaÂ CrystallographicaÂ SectionÂ D	1744-9561, 1744-957X	A national facility for biological cryo-electron microscopy	677.06	TRUE			FALSE	cc-by	epmc_xml	hybrid	TRUE	Wellcome Trust	0	0	100146/Z/12/Z	0	0
PMC4428075	0	10.3389/fmicb.2015.00455	Frontiers	Frontiers in Microbiology	1664-302X	The stoichimoetric divisome: A hypothesis	682.57	TRUE			FALSE	cc-by	epmc_xml	oa	TRUE	Wellcome Trust	0	0	101824/Z/13/Z	0	0
PMC4216812	25363364	10.3402/gha.v7.25878	Co-Action Publishing	Global Health Action	1654-9716, 1654-9880	Electronic data capture in a rural African setting: evaluating experiences with different systems in Malawi	705.86	TRUE			FALSE	cc-by	epmc_xml	oa	TRUE	Wellcome Trust
PMC4343029	0	10.3389/fimmu.2015.00085	Frontiers	Frontiers in Immunology	1664-3224	A meta-analysis of experimental studies of attenuated Schistosoma mansoni vaccines in the mouse model	712.37	TRUE			FALSE	cc-by	epmc_xml	oa	TRUE	Wellcome Trust	0	0	095831/Z/11/Z
PMC4635194	26473531	10.1038/bcj.2015.85	Nature Publishing Group	Blood Cancer Journal	2044-5385	Alterations in bone marrow metabolism are an early and consistent feature during the development of MGUS and multiple myeloma	720	TRUE			FALSE	cc-by	epmc_xml	oa	TRUE	Cancer Research UK	Leukaemia & Lymphoma Research	0	C1520/A9992	10139	0
PMC4227571	25426046	10.3389/fnhum.2014.00891	Frontiers	Frontiers in Human Neuroscience	1662-5161	A neurobiological enquiry into the origins of our experience of the sublime and beautiful	725.76	TRUE			FALSE	cc-by	epmc_xml	oa	TRUE	Wellcome Trust
PMC4271591	25566071	10.3389/fphar.2014.00270	Frontiers	Frontiers in Pharmacology	1663-9812	In utero therapy for congenital disorders using amniotic fluid stem cells	725.76	TRUE			FALSE	cc-by	epmc_xml	oa	TRUE	Wellcome Trust			099083/Z/11/Z
PMC4224090	25426050	10.3389/fnhum.2014.00901	Frontiers	Frontiers in Human Neuroscience	1662-5161	Parallel processing of face and house stimuli by V1 and specialized visual areas: a magnetoencephalographic (MEG) study	725.76	TRUE			FALSE	cc-by	epmc_xml	oa	TRUE	Wellcome Trust
PMC4237036	25477849	10.3389/fpsyg.2014.01329	Frontiers	Frontiers in Psychology	1664-1078	Working memory for time intervals in auditory rhythmic sequences	725.76	TRUE			FALSE	cc-by	epmc_xml	oa	TRUE	Wellcome Trust			WT091681MA
PMC4215630	25400633	10.3389/fimmu.2014.00535	Frontiers Media SA	Frontiers in Immunology	1664-3224	B1b cells recognize protective antigens after natural infection and vaccination	727.212	TRUE			FALSE	cc-by	epmc_xml	oa	TRUE	Wellcome Trust	MRC	0	DKAARCHX14468	DKAARRAK13340	0
PMC4537280	26273826	10.1371/journal.pntd.0003933	PLOS	Neglected Tropical Diseases	1935-2727, 1935-2735	ApiAP2 Factors as Candidate Regulators of Stochastic Commitment to Merozoite Production in Theileria annulata	727.28	TRUE			FALSE	cc-by	epmc_xml	oa	TRUE	Wellcome Trust			WT075820
PMC4332365	0	10.3389/fimmu.2015.00051	Frontiers	Frontiers in Immunology	1664-3224	Down regulation of the TCR complex CD3 ?-chain on CD3+ T cells: a potential mechanism for helminth mediated immune modulation	732.77	TRUE			FALSE	cc-by	epmc_xml	oa	TRUE	Wellcome Trust	0	0	095831/Z/11/Z
PMC4419506	25887581	10.1186/s12891-015-0534-1	Biomed Central	BioMed Central	1471-2474	Primary outcome measure use in back pain trials may need radical reassessment	735.74	TRUE			FALSE	cc-by	epmc_xml	oa	TRUE	Arthritis Research UK			19480
PMC4364581	25539734	10.1186/1471-2474-15-451	Biomed Central	BMC Muskuloskeletal	1471-2474	The development of an outcome prediction tool for patients considering a total knee replacement -- the Knee Outcome Prediction Study (KOPS)	735.74	TRUE			FALSE	cc-by	epmc_xml	oa	TRUE	Arthitis Research U.K.	0	0	20596	0	0
PMC4468337	26097884	10.18632/oncoscience.149	Impact Journals	Oncoscience	2331-4737	Methylation changes in the TFAP2E promoter region are associated with BRAF mutation and poorer overall & disease free survival in colorectal cancer	747.72	TRUE			FALSE	cc-by	epmc_xml	hybrid	TRUE	Wellcome Trust	0	0	102732/Z/13/Z	0	0
PMC4585930	26411260	10.4161/21541248.2014.992259	Taylor & Francis	Small GTPases	2045-2322	Integration of the Rac1- and actin-binding properties of Coronin-1C	750	TRUE			FALSE	cc-by	epmc_xml	oa	TRUE	Wellcome Trust			WT88419
PMC4196579	25352829	10.3389/fendo.2014.00160	Frontiers Research Foundation	Frontiers in Endocrinology	1664-2392	The importance of podocyte adhesion for a healthy glomerulus	758.05	TRUE			FALSE	cc-by	epmc_xml	oa	TRUE
PMC4222142	25414654	10.3389/fnhum.2014.00853	Frontiers	Frontiers in Human Neuroscience	1662-5161	Flexibility of representational states in working memory	760.38	TRUE			FALSE	cc-by	epmc_xml	oa	TRUE	Wellcome Trust				98282
PMC4498711	26144235	10.1107/S2053230X15008584	International Union of Crystallography	Acta Crystallographica Section F	2053-230X	Structure of human saposin A at lysosomal pH	762.92	TRUE			FALSE	cc-by	epmc_xml	hybrid	TRUE	0	0	0	0	0	0
PMC4513130	25979333	10.1074/jbc.M114.627059	The American Society for Biochemistry and Molecular Biology, Inc.	The Journal of Biological Chemistry	0021-9258, 1083-351X	Neuronal Calcium Sensor-1 Binds the D2 Dopamine Receptor and G-protein-coupled Receptor Kinase 1 (GRK1) Peptides Using Different Modes of Interactions	767.02	TRUE			FALSE	cc-by	epmc_xml	hybrid	TRUE	Wellcome Trust			099796/Z/12/Z
PMC4188010	25286854	10.1107/S1399004714017581	Wiley	Acta Crystallographica Section D	0907-4449, 1399-0047	Using textons to rank crystallization droplets by the likely presence of crystals	772.21	TRUE			FALSE	cc-by	epmc_xml	hybrid	TRUE	Wellcome Trust				092809/Z/10/Z
PMC4405644	25733689	10.1128/MCB.01478-14	American Society for Microbiology	Molecular and Cell Biology	0270-7306, 1098-5549	Promyelocytic leukemia protein isoform II promotes transcription factor recruitment to activate interferon ? and interferon-responsive gene expression	777.35	TRUE			FALSE	cc-by	epmc_xml	hybrid	TRUE	Wellcome Trust	Sir Richard Stapley Education Trust	Great Britain – China Educational Trust	WT094713MA
PMC4432636	25984346	10.1038/sdata.2014.42	Nature Publishing Group	Scientific Data	2052-4463	A comprehensive database of the geographic spread of past human Ebola outbreaks	780	TRUE			FALSE	cc-by	epmc_xml	oa	TRUE	Wellcome Trust				095066/Z/10/Z
PMC4409013	25977820	10.1038/sdata.2015.16	Nature Publishing Group	Scientific Data	2052-4463	A global compendium of human Crimean-Congo haemorrhagic fever virus occurrence	780	TRUE			FALSE	cc-by	epmc_xml	oa	TRUE	Wellcome Trust				095066/Z/10/Z
PMC4432653	25984344	10.1038/sdata.2014.36	Nature Publishing Group	Scientific Data	2052-4463	Global database of Leishmaniasis occurrence locations, 1960-2012	780	TRUE			FALSE	cc-by	epmc_xml	oa	TRUE	Wellcome Trust				095066/Z/10/Z
PMC4540003	26306203	10.1038/sdata.2015.12	Nature Publishing Group	Scientific Data	2052-4463	Global database of matched Plasmodium falciparum and P.vivax incidence and prevalence records from 1985-2013	780	TRUE			FALSE	cc-by	epmc_xml	oa	TRUE	Wellcome Trust				095066/Z/10/Z
PMC4461329	26057794	10.1107/s2053230x15006354	ACTA Publications	Acta Crystallographica Section F	2053-230X	Purification, crystallization and preliminary X-ray diffraction analysis of the Escherichia coli common pilus chaperone EcpB	786.42	TRUE			FALSE	cc-by	epmc_xml	hybrid	TRUE	WT			WT100280MA
PMC4528935	26249693	10.1107/S2053230X15010614	International Union of Crystallography	Acta Cryst F	2053-230X	Structures of Pseudomonas aeruginosa ?-ketoacyl-(acyl-carrier-protein) synthase II (FabF) and a C164Q mutant provide templates for antibacterial drug discovery and identify a buried potassium ion and a ligand-binding site that is an artefact of the crystal form	794.37	TRUE			FALSE	cc-by	epmc_xml	hybrid	TRUE	Wellcome Trust				82596	94090
PMC4536380	26321991	10.3389/fpsyg.2015.01178	Frontiers Research Foundation	Frontiers in Neuroscience	1664-1078	Source analysis of electrophysiological correlates of beat induction as sensory-guided action	802.53	TRUE			FALSE	cc-by	epmc_xml	oa	TRUE
PMC4356314	25760713	10.1107/S2053230X15001351	Wiley	Acta Crystallographica Section F	2053-230X	Improved crystallization and diffraction of caffeine-induced death suppressor protein 1 (Cid1)	802.79	TRUE			FALSE	cc-by	epmc_xml	hybrid	TRUE	Wellcome Trust				090532/Z/09/Z
PMC4636628	26525723	10.1136/bmjopen-2015-009088	BMJ	BMJ Open	2044-6055	Can clinical features be used to differentiate Type 1 from Type 2 diabetes? A systematic review of the literature	810	TRUE			FALSE	cc-by	epmc_xml	oa	TRUE	Wellcome Trust	Other	0	098395/Z/12/Z	PB-PG-0711-25111	0
PMC4252079	25461959	10.1371/journal.pone.0114028	PLOS	PLOS ONE	1932-6203	Attributions of cancer 'alarm' symptoms in a community sample	810	TRUE			FALSE	cc-by	epmc_xml	oa	TRUE	Cancer Research UK			C33872/A13216
PMC4257615	25478928	10.1371/journal.pone.0113883	PLOS	PLOS ONE	1932-6203	Ethnic variability in body size proportions and composition in children aged 5 to 11 years: Is ethnic-specific calibration of bioelectrical impedance required?	810	TRUE			FALSE	cc-by	epmc_xml	oa	TRUE	Wellcome Trust			WT094129MA
PMC4257606	25479610	10.1371/journal.pone.0114283	PLOS	PLOS ONE	1932-6203	Health factors and risk of all-cause cardiovascular and coronary heart disease mortality: findings from the MONICA and HAPIEE studies in Lithuania	810	TRUE			FALSE	cc-by	epmc_xml	oa	TRUE	Wellcome Trust			081081/Z/01/Z
PMC4221282	25372459	10.1371/journal.pone.0112247	PLOS	PLOS ONE	1932-6203	Regulation of the orphan nuclear receptor Nr2f2 by the DFNA15 deafness gene Pou4f3	810	TRUE			FALSE	cc-by	epmc_xml	oa	TRUE	Wellcome Trust			091092/Z/09/Z; 064599
PMC4486835	26190970	10.3389/fncel.2015.00239	Frontiers	Frontiers in Cellular Neuroscience	1662-5102	Calmodulin as a major calcium buffer shaping vesicular release and short-term synaptic plasticity: facilitation through buffer dislocation	820.8	TRUE			FALSE	cc-by	epmc_xml	oa	TRUE	Wellcome Trust
PMC4602094	26528151	10.3389/fnbeh.2015.00268	Frontiers	Frontiers in Behavioral Neuroscience	1662-5153	Dissecting Alzheimer disease in Down syndrome using mouse models	820.8	TRUE			FALSE	cc-by	epmc_xml	oa	TRUE	Wellcome Trust
PMC4526800	26300728	10.3389/fncel.2015.00290	Frontiers	Frontiers in Cellular Neuroscience	1662-5102	GABAA Receptor Activity Shapes the Formation of Collateral Inhibitory Synapses between Developing Medium Spiny Neurons	820.8	TRUE			FALSE	cc-by	epmc_xml	oa	TRUE	Wellcome Trust	MRC			MRC UK (G0800498)
PMC4502341	26236245	10.3389/fpsyg.2015.00925	Frontiers	Frontiers in Psychology	1664-1078	Grid cells on steeply sloping terrain: evidence for planar rather than volumetric encoding	820.8	TRUE			FALSE	cc-by	epmc_xml	oa	TRUE	Wellcome Trust	BBSRC		WT083540 and WT103896AIA	BB/J009792/1
PMC4325661	25729372	10.3389/fpsyg.2015.00090	Frontiers	Frontiers in Psychology	1664-1078	Mindfulness meditation modulates reward prediction errors in the striatum in a passive conditioning task	820.8	TRUE			FALSE	cc-by	epmc_xml	oa	TRUE	Wellcome Trust			091188/Z/10/Z
PMC4501222	26236246	10.3389/fpsyg.2015.00927	Frontiers	Frontiers in Psychology	1664-1078	Neural encoding of large-scale three-dimensional space â€“ properties and constraints	820.8	TRUE			FALSE	cc-by	epmc_xml	oa	TRUE	Wellcome Trust	BBSRC		WT083540 and WT103896AIA	BB/J009792/1
PMC4468941	26136770	10.3389/fgene.2015.00212	Frontiers	Frontiers in Genetics	1664-8021	The aging-disease false dichotomy: understanding senescence as pathology	820.8	TRUE			FALSE	cc-by	epmc_xml	oa	TRUE	Wellcome Trust
PMC4586432	26483713	10.3389/fpsyg.2015.01445	Frontiers	Frontiers in Psychology	1664-1078	The computational psychiatry of reward: Broken brains or misguided minds?	820.8	TRUE			FALSE	cc-by	epmc_xml	oa	TRUE	Wellcome Trust			098362/Z/12/Z and 095844/7/11/Z
PMC4526808	26300778	10.3389/fphar.2015.00164	Frontiers	Frontiers in Pharmacology	1663-9812	The genetically encoded tool set for investigating cAMP: more than the sum of its parts	820.8	TRUE			FALSE	cc-by	epmc_xml	oa	TRUE	Wellcome Trust
PMC4379892	25873856	10.3389/fnins.2015.00103	Frontiers	Frontiers in Genetics	1662-4548, 1662-453X	The neural milieu of the developing choroid plexus: neural stem cells, neurons and innervation	820.8	TRUE			FALSE	cc-by	epmc_xml	oa	TRUE	Wellcome Trust	MRC		GR082557	G070089
PMC4347654	25889795	10.1186/s13104-015-1007-1	Biomed Central	BMC Research Notes	1756-0500	Comparison of semi-automated methods to quantify infarct size and myocardial salvage by cardiovascular magnetic resonance imaging at 1.5T and 3.0T field strengths	825	TRUE			FALSE	cc-by	epmc_xml	oa	TRUE	British Heart Foundation	MRC	0	The study that we are publishing here was part of the analysis of the CMR substudy (CvLPRIT-CMR) of a study called CvLPRIT (Culprit Versus Lesion-only Primary PCI trial), looking at the management of STEMI (heart attack) patients with multiple diseased coronary vessels (multivessel disease). The main CvLPRIT trial was funded by the British Heart Foundation (SP/10/001) with support from the (NIHR)…	0	0
PMC4208768	25343719	10.1371/journal.pone.0110586	PLOS	PLoS ONE	1932-6203	The association between a vegetarian diet and cardiovascular disease (CVD) risk factors in India.	827.66	TRUE			FALSE	cc-by	epmc_xml	oa	TRUE	Wellcome Trust			WT084674
PMC4293902	25387830	10.1042/BSR20140150	Portland Press	Biosciences Reports	0144-8463, 1573-4935	Biochemical and structural characterisation of the apicoplast dihydrolipoamide dehydrogenase of Plasmodium falciparum	834	TRUE			FALSE	cc-by	epmc_xml	oa	TRUE	Wellcome Trust			086411/Z/08/Z-LML, WT061173MA-SM
PMC4407614	25954246	10.3389/fendo.2015.00052	Frontiers Media	Frontiers in Endocrinology	1664-2392	Quantification of alterations in cortical bone geometry using Site Specificity Software in mouse models of aging and the responses to ovariectomy and altered loading	834.78	TRUE			FALSE	cc-by	epmc_xml	oa	TRUE	Wellcome Trust			WT092045/Z/10/Z
PMC4373508	25859219	10.3389/fphys.2015.00080	Frontiers	Frontiers in Physiology	1664-042X	The importance of Ca(2+) - dependent mechanisms for the initiation of the heartbeat	843.1	TRUE			FALSE	cc-by	epmc_xml	oa	TRUE	British Heart Foundation				FS/09/054
PMC4256473	25474027	10.1371/journal.pntd.003316	PLOS	PLOS Neglected Tropical Diseases	1935-2727, 1935-2735	Multi-modal analysis of courtship behaviour in the old world leishmaniasis vector phlebotomus argentipes	845.19	TRUE			FALSE	cc-by	epmc_xml	oa	TRUE	Wellcome Trust			91689	89342
PMC4426833	25596205	10.1093/bioinformatics/btu861	Oxford University Press	Bioinformatics	1367-4803, 1367-4811	scrm: efficiently simulating long sequences using the approximated coalescent with recombination	850	TRUE			FALSE	cc-by	epmc_xml	hybrid	TRUE	Wellcome Trust				090532/Z/09/Z
PMC4498744	26162093	10.1371/journal.pone.0132239	PLOS	PLOS One	1932-6203	Comparison of bone mineral density between urban and rural areas: Systematic review and meta-analysis.	850.18	TRUE			FALSE	cc-by	epmc_xml	oa	TRUE	Wellcome Trust			WT084674/Z/08/Z
PMC4212176	24027033	10.3758/s13414-013-0541-y	Springer	Attention, Perception & Psychophysics	1943-3921, 1943-393X	The privileged role of location in visual working memory	851.91	TRUE			FALSE	cc-by	epmc_xml	hybrid	TRUE	Wellcome Trust				98282
PMC4267653	25429977	10.1093/nar/gku123	Oxford University Press	Nucleic Acids Research (OA)	0305-1048, 1362-4962	DNA cleavage by CgII and NgoAVII requires interaction between N- and R-proteins and extensive nucleotide hydrolysis	852	TRUE			FALSE	cc-by	epmc_xml	oa	TRUE	Wellcome Trust			WT84086
PMC4333373	25572315	10.1093/nar/gku1295	Oxford University Press	Nucleic Acids Research	0305-1048, 1362-4962	Specific and non-specific interactions of ParB with DNA: implications for chromosome segregation	852	TRUE			FALSE	cc-by	epmc_xml	oa	TRUE	Wellcome Trust			WT77368	WT100401
PMC4267662	25428352	10.1093/nar/gku1254	Oxford University Press	Nucleic Acids Research	0305-1048, 1362-4962	Constrained transcription factor spacing is prevalent and important for transcriptional control of mouse blood cells	852	TRUE			FALSE	cc-by	epmc_xml	oa	TRUE	0	0	0	0	0	0
PMC4477659	25940628	10.1093/nar/gkv429	Oxford University Press	Nucleic Acids Research	0305-1048, 1362-4962	Generation of functionally distinct isoforms of PTBP3 by alternative splicing and translation initiation	852	TRUE			FALSE	cc-by	epmc_xml	oa	TRUE	0	0	0	0	0	0
PMC4227794	25326325	10.1093/nar/gku981	Oxford University Press	Nucleic Acids Research	0305-1048, 1362-4962	Mapping overlapping functional elements embedded within the protein-coding regions of RNA viruses	852	TRUE			FALSE	cc-by	epmc_xml	oa	TRUE	0	0	0	0	0	0
PMC4245959	25389270	10.1093/nar/gku1134	Oxford University Press	Nucleic Acids Research	0305-1048, 1362-4962	Molecular recognition of RhlB and RNase D in the Caulobacter crescentus RNA degradosome	852	TRUE			FALSE	cc-by	epmc_xml	oa	TRUE	0	0	0	0	0	0
PMC4482059	25722372	10.1093/nar/gkv135	Oxford University Press	Nucleic Acids Research	0305-1048, 1362-4962	multiSNV: a probabilistic approach for improving detection of somatic point mutations from multiple related tumour samples	852	TRUE			FALSE	cc-by	epmc_xml	oa	TRUE	0	0	0	0	0	0
PMC4550654	26194024	10.1007/s00134-015-3930-y	Springer	Intensive Care Medicine	0342-4642, 1432-1238	Consensus statement from the 2014 International Microdialysis Forum	852	TRUE			FALSE	cc-by	epmc_xml	hybrid	TRUE	0	0	0	0	0	0
PMC4267655	0	10.1093/nar/gku1238	Oxford University Press	Nucleic Acids Research	0305-1048, 1362-4962	Brr2p carboxy-terminal Sec63 domain modulates Prp16 splicing RNA helicase	852	TRUE			FALSE	cc-by	epmc_xml	oa	TRUE	Wellcome Trust	0	0	087551, 092076
PMC4231753	25262348	10.1093/nar/gku884		Nucleic acids research	0305-1048, 1362-4962	A split intein T7 RNA polymerase for transcriptional AND-logic	852	TRUE			FALSE	cc-by	epmc_xml	oa	TRUE	Wellcome Trust			102944/Z/13/Z
PMC4513864	0	10.1093/nar/gkv586	Oxford University Press	Nucleic Acids Research	0305-1048, 1362-4962	Bacteriophage Xp10 and anti-termination factor p7 induces forward translocation by host RNA polymerase	852	TRUE			FALSE	cc-by	epmc_xml	oa	TRUE	Wellcome Trust	0	0	102851/Z/13/Z	0	0
PMC4402522	25779042	10.1093/nar/gkv194	Oxford University Press	Nucleic Acids Research	0305-1048, 1362-4962	Identification of U2AF(35)-dependent exons by RNA-Seq reveals a link between 3â€™ splice-site organization and activity of U2AF-related proteins	852	TRUE			FALSE	cc-by	epmc_xml	oa	TRUE	Leukaemia & Lymphoma Research			12060
PMC4384018	25348408	10.1093/nar/gku947	Oxford University Press	Nucleic Acids Research	0305-1048, 1362-4962	CATH: Comprehensive structural and functional annotations for genome sequences	852	TRUE			FALSE	cc-by	epmc_xml	oa	TRUE	Wellcome Trust			081989/2/02/2
PMC4229124	0	10.1371/journal.pone.0112014	PLOS	PLOS ONE	1932-6203	Inhibitors Of The Interferon Response Enhance Virus Replication In Vitro	854.43	TRUE			FALSE	cc-by	epmc_xml	oa	TRUE	Wellcome Trust			087751/A/08/Z
PMC4227661	0	10.1371/journal.pone.0111851	PLOS	PLoS One	1932-6203	NET23/STING Promotes Chromatin Compaction from the Nuclear Envelope	857.03	TRUE			FALSE	cc-by	epmc_xml	oa	TRUE	Wellcome Trust	0	0	095209/Z/10/Z
PMC4498629	26162085	10.1371/journal.pone.0132401	PLOS	PLOS Neglected Tropical Diseases	1932-6203	A systematic review of tobacco smoking prevalence and description of tobacco control strategies in Sub-Saharan African Countries 2007 - 2014.	857.96	TRUE			FALSE	cc0	epmc_xml	oa	TRUE	Wellcome Trust			WT098504/Z/12/Z
PMC4504505	26181760	10.1371/journal.pone.0132840	PLOS	PLOS One	1932-6203	Whole genome sequencing shows a low proportion of tuberculosis disease is attributable to known close contacts in rural Malawi.	857.96	TRUE			FALSE	cc-by	epmc_xml	oa	TRUE	Wellcome Trust			WT098610/Z/12/Z
PMC4322845	25713538	10.3389/fphys.2015.00023	Frontiers	Frontiers in Physiology	1664-042X	Cytosolic calcium ions exert a major influence on the firing rate and maintenance of pacemaker activity in guinea-pig sinus node	858.38	TRUE			FALSE	cc-by	epmc_xml	oa	TRUE	British Heart Foundation				FS/09/054
PMC4470912	26083409	10.1371/journal.pone.0129928	PLOS	PLOS ONE	1932-6203	T-cell subsets predict mortality in malnourished Zambian adults initiating antiretroviral therapy	860.2	TRUE			FALSE	cc-by	epmc_xml	oa	TRUE	Wellcome Trust			093768/Z/10/Z
PMC4474610	26090798	10.1371/journal.pone.0130356	PLOS	PLoS One	1932-6203	Conditional U1 Gene Silencing in Toxoplasma gondii	863.39	TRUE			FALSE	cc-by	epmc_xml	oa	TRUE	Wellcome Trust			087582/Z/08/Z
PMC4332656	25679979	10.1371/journal.pone.0116342	PLOS	PLOSOne	1932-6203	Risk factors associated with recurrent diarrheal illnesses among children in Kabul, Afghanistan: a prospective cohort study.	863.39	TRUE			FALSE	cc-by	epmc_xml	oa	TRUE	Wellcome Trust			WT082476/Z07/Z
PMC4331495	25689628	10.1371/journal.pone.0118187	PLOS	PLOS ONE	1932-6203	Vasoactivity of Rucaparib, a PARP-1 Inhibitor, is a Complex Process that Involves Myosin Light Chain Kinase, P2 Receptors, and PARP Itself	864.21	TRUE			FALSE	cc-by	epmc_xml	oa	TRUE	Cancer Research UK			C1278/A5965
PMC4593553	26437372	10.1371/journal.pcbi.1004355	PLOS	PLoS Computational Biology	1553-734X, 1553-7358	Reconciling estimates of cell proliferation from stable isotope labeling experiment	865.1	TRUE			FALSE	cc-by	epmc_xml	oa	TRUE	WT			103865/Z/14/Z
PMC4452790	26034982	10.1371/journal.pone.0128513	PLOS	PLoS One	1932-6203	The forkhead transcription factor in FOXP2 is required for regulation of p21WAF1/CIP1 in 143B osteosarcoma cell growth arrest	866.68	TRUE			FALSE	cc-by	epmc_xml	oa	TRUE	Wellcome Trust	Leukaemia & Lymphoma Research			075491 and 080971	10044
PMC4476610	26098415	10.1371/journal.pone.0129063	PLOS	PLoS One	1932-6203	The Leukocyte immunoglobulin-like receptor family member LILRB5 Binds to HLA-class I Heavy chains	866.68	TRUE			FALSE	cc-by	epmc_xml	oa	TRUE	Cancer Research UK				A10702
PMC4216080	25360558	10.1371/journal.pone.0111518	PLOS	PLoS One	1932-6203	An analysis of the binding characteristics of a panel of recently selected ICAM-1 binding Plasmodium falciparum patient isolates	868.7	TRUE			FALSE	cc-by	epmc_xml	oa	TRUE	Wellcome Trust			WT095507
PMC4520585	26225853	10.1371/journal.pone.0136976	PLOS	PLOS One	1932-6203	Designing psychological treatments for scalability: The PREMIUM approach.	870.8	TRUE			FALSE	cc-by	epmc_xml	oa	TRUE	Wellcome Trust			WT092907/Z/10/Z
PMC4469320	26079685	10.1371/journal.pone.0129468	PLOS	PLOS One	1932-6203	Is the association between Vitamin D and cardiovascular disease risk confounded by obesity?	871.81	TRUE			FALSE	cc-by	epmc_xml	oa	TRUE	Wellcome Trust			WT083707
PMC4550285	0	10.1371/journal.pone.0134883	PLOS	PLOS	1932-6203	Sex-differences in the Metabolic Health of Offspring of Parents with Diabetes: A Record-linkage Study	874.65	TRUE			FALSE	cc-by	epmc_xml	oa	TRUE	Wellocme Trust	0	0	WT086113			WT064890
PMC3879413	24392306	10.1016/j.nicl.2013.12.004	Elsevier	NeuroImage: Clinical	2213-1582	Progressive white matter changes following anterior temporal lobe resection for epilepsy	877	TRUE			FALSE	cc-by	epmc_xml	oa	TRUE	Wellcome Trust	MRC		83148	G0802012
PMC4250081	0	10.1371/journal.pone.0114117	PLOS	PLoS One	1932-6203	Characterisation of Translation Elongation Factor eEF1B Subunit Expression in Mammalian Cells and Tissues and Co-Localisation with eEF1A2	879.27	TRUE			FALSE	cc-by	epmc_xml	oa	TRUE	Wellcome Trust	0	0	WT094180
PMC4580650	26398888	10.1371/journal.pone.0138545	PLOS	PLOS One	1932-6203	Characterizing heterogeneity within head & neck lesions using cluster analysis of multi-parametric MRI data	883.5	TRUE			FALSE	cc-by	epmc_xml	oa	TRUE	Cancer Research UK			0
PMC4468205	26076167	10.1371/journal.pone.0129470	PLOS	PLOS One	1932-6203	PTEN regulates epithelial cytodifferentiation during prostate development	883.5	TRUE			FALSE	cc-by	epmc_xml	oa	TRUE	Cancer Research UK			0
PMC4556633	26325073	10.1371/journal.pone.0136962	PLOS	PLoS ONE	1932-6203	The perfect burrow, but for what?	885	TRUE			FALSE	cc-by	epmc_xml	oa	TRUE	Wellcome Trust	NERC		090213/z/09/z
PMC4364955	25785774	10.1371/journal.pone.0119120	PLOS	PLOSOne	1932-6203	Adequately Diversified Dietary Intake and Iron and Folic Acid Supplementation during Pregnancy Is Associated with Reduced Occurrence of Symptoms Suggestive of Pre-Eclampsia or Eclampsia in Indian Women	885.36	TRUE			FALSE	cc-by	epmc_xml	oa	TRUE	Wellcome Trust			WT084674
PMC4382175	0	10.1371/journal.pone.0121303	PLOS	PLOS ONE	1932-6203	Plasmodium knowlesi Genome Sequences from Clinical Isolates Reveal Extensive Genomic Dimorphism	888.16	TRUE			FALSE	cc-by	epmc_xml	oa	TRUE	Wellcome Trust			097831/Z/11/Z
PMC4380462	25826619	10.1371/journal.pone.0122589	PLOS	PLOS One	1932-6203	Common variation at 1q24.1 (ALDH9A1) is a potential risk factor for renal cancer	889.11	TRUE			FALSE	cc0	epmc_xml	oa	TRUE	Cancer Research UK			#REF!
PMC4486172	26121586	10.1371/journal.pone.0131218	PLOS	PLOS D	1932-6203	Serendipitous SAD Solution for DMSO-Soaked SOCS2-ElonginC-ElonginB Crystals Using Covalently Incorporated Dimethylarsenic: Insights into Substrate Receptor Conformational Flexibility in Cullin RING Ligases.	889.96	TRUE			FALSE	cc-by	epmc_xml	oa	TRUE	Wellcome Trust				100476/Z/12/Z		88891
PMC4449205	0	10.1371/journal.pone.0127712	PLOS	PLOS	1932-6203	TMEM120A and B: Nuclear Envelope Transmembrane Proteins Important for Adipocyte Differentiation	892.79	TRUE			FALSE	cc-by	epmc_xml	oa	TRUE	Wellcome Trust	0	0	095209/Z/10/Z
PMC4687864	26139220	10.1152/japplphysiol.01014.2014	Cadmus Journal Services	Journal of Applied Physiology	8750-7587, 1522-1601	Identification of mouse gaits using a novel force-sensing exercise wheel	893.15	TRUE			FALSE	cc-by	epmc_xml	hybrid	TRUE
PMC4468061	0	10.1371/journal.pone.0129548	PLOS	PLOS ONE	1932-6203	Deletion of Genes encoding Arginase improves use of heavy isotope labeled Arginine for mass Spec	893.83	TRUE			FALSE	cc-by	epmc_xml	oa	TRUE	Wellcome Trust	0	0	[094517][103139][091020][C20060/A10789] [092076]
PMC4569348	26367874	10.1371/journal.pone.0136207	PLOS	PLoS One	1932-6203	Double Relapsed and/or Refractory Multiple Myeloma: Clinical Outcomes and Real World Healthcare Costs	894.5	TRUE			FALSE	cc-by	epmc_xml	oa	TRUE	Wellcome Trust				102341/Z/13/Z
PMC4569550	26367740	10.1371/journal.pone.0137947	PLOS	PLoS ONE	1932-6203	Functional Divergence of Hsp90 Genetic Interactions in Biofilm and Planktonic Cellular States	895.21	TRUE			FALSE	cc-by	epmc_xml	oa	TRUE	Wellcome Trust	0	0	RG10992-10	0	0
PMC4179512	25324843	10.3389/fimmu.2014.00466		Frontiers in immunology	1664-3224	Immunity to RSV in Early Life	897.61	TRUE			FALSE	cc-by	epmc_xml	oa	TRUE	Medical Research Council (MRC); Wellcome Trust; National Institute for Health Research			090382/Z/09/Z; 087805/Z/08/Z
PMC4547745	0	10.1371/journal.pone.0134620	PLOS	PLOS	1932-6203	Klf15 Is Critical for the Development and Differentiation of Drosophila Nephrocytes	898.07	TRUE			FALSE	cc-by	epmc_xml	oa	TRUE	British Heart Foundation	0	0	FS/13/17/29905
PMC4557950	0	10.1371/journal.pone.0137377	PLOS	PLOS	1932-6203	Low vitamin D status is associated with systemic and gastrointestinal inflammation in dogs with a chronic enteropathy	898.07	TRUE			FALSE	cc-by	epmc_xml	oa	TRUE	Wellcome Trust	0	0	098493/Z/12/Z
PMC4577127	26390124	10.1371/journal.pone.0138026	PLOS	PLoS One	1932-6203	Non-Life Threatening Maternal Morbidity: Cross Sectional Surveys from Malawi and Pakistan	900.97	TRUE			FALSE	cc-by	epmc_xml	oa	TRUE	Wellcome Trust			WT065810/Z/01/Z
PMC4468130	0	10.1371/journal.pone.0130147	PLOS	PLOS ONE	1932-6203	2-O Heparan Sulfate Sulfation by Hs2st is Required for Erk/Mapk Signalling Activation at the Mid-gestational Mouse Telencephalic Midline	901.64	TRUE			FALSE	cc-by	epmc_xml	oa	TRUE	Wellcome Trust	0	0	094832/Z/10/Z
PMC4583259	26406307	10.1371/journal.pone.0138762	PLOS	PLoS One	1932-6203	Chronic Household Air Pollution Exposure Is Associated with Impaired Alveolar Macrophage Function in Malawian Non-Smokers	901.78	TRUE			FALSE	cc-by	epmc_xml	oa	TRUE	Wellcome Trust			WT086756/B/08/Z
PMC4300917	25653599	10.3389/fnsys.2014.00250	Frontiers	Frontiers in Systems Neuroscience	1662-5137	Lesions of either anterior orbitofrontal cortex or ventrolateral prefrontal cortex in marmoset monkeys heighten innate fear and attenuate active coping behaviors to predator threat	902.75	TRUE			FALSE	cc-by	epmc_xml	oa	TRUE	0	0	0	0	0	0
PMC4468870	26136743	10.3389/fimmu.2015.00303	Frontiers	Frontiers in Immunology	1664-3224	MR1-Restricted Mucosal-Associated Invariant T Cells and Their Activation during Infectious Diseases	903.8	TRUE			FALSE	cc-by	epmc_xml	oa	TRUE	Cancer Research UK				C399/A17722
PMC4427185	25962075	10.1371/journal.pone.0126666	PLOS	PLosONE	1932-6203	Beyond the biomedical: community resources for mental health care in rural Ethiopia.	905.13	TRUE			FALSE	cc-by	epmc_xml	oa	TRUE	Wellcome Trust			100142/Z/12/Z
PMC4441256	25135277	10.1111/mmi.12755	Wiley	Molecular Microbiology	0950-382X, 1365-2958	The post-translational modification of the Clostridium difficile flagellin affects motility, cell surface properties and virulence	905.2	TRUE			FALSE	cc-by	epmc_xml	hybrid	TRUE	Wellcome Trust			WT086418
PMC4372349	25803307	10.1371/journal.pone.0119718	PLOS	PLoS One	1932-6203	Annexin A8 identifies a subpopulation of transiently quiescent c-kit positive luminal progenitor cells of the ductal mammary epithelium	906.58	TRUE			FALSE	cc-by	epmc_xml	oa	TRUE	Breast Cancer Campaign			2012NovPR006
PMC4390202	25853703	10.1371/journal.pone.0121357	PLOS	PLoS One	1932-6203	External validation and calibration of IVFpredict: a national prospective cohort study of 130960 in vitro fertilisation cycles	906.58	TRUE			FALSE	cc-by	epmc_xml	oa	TRUE	Wellcome Trust			094311/Z/10/Z
PMC4285868	25610399	10.3389/fphys.2014.00508	Frontiers	Frontiers in Physiology	1664-042X	Detecting cardiac contractile activity in the early mouse embryo using multiple modalities	906.66	TRUE			FALSE	cc-by	epmc_xml	oa	TRUE	British Heart Foundation	Wellcome Trust			RE/13/1/30181	074246/Z04/Z
PMC4435908	25984723	10.1371/journal.pone.0126271	PLOS	PLoS Medicine	1932-6203	The Association between Mycobacterium Tuberculosis Genotype and Drug Resistance in Peru	907.44	TRUE			FALSE	cc0	epmc_xml	oa	TRUE	Wellcome Trust			WT078067/Z/05/Z
PMC4283608	25601869	10.3389/fimmu.2014.00677	Frontiers Media	Frontiers in Immunology	1664-3224	Metabolic syndrome and the immunologic affair with the blood-brain barrier	913.77	TRUE			FALSE	cc-by	epmc_xml	oa	TRUE	British Heart Foundation	British Heart Foundation	Arthritis Research UK	RG/14/2/30616	FS/12/38/29640
PMC4441487	26001071	10.1371/journal.pone.0127713	PLOS	PLOS ONE	1932-6203	MAGE-A Cancer/Testis Antigens Inhibit MDM2 Ubiquitylation Function and Promote Increased Levels of MDM4	916.65	TRUE			FALSE	cc-by	epmc_xml	oa	TRUE	Breast Cancer Campaign				2008NovPR32	2001NovPhD07
PMC4240045	25484868	10.3389/fphys.2014.00445	Frontiers	Frontiers in Physiology	1664-042X	Expression analysis of candidate genes regulating successional tooth formation in the human embryo	920	TRUE			FALSE	cc-by	epmc_xml	oa	TRUE	Wellcome Trust	MRC	Arthritis UK / British Heart Foundation	AMS-SGCL 10- Xavier
PMC4528075	26079577	10.1016/j.ydbio.2015.06.003	Elsevier	Developmental Biology	0012-1606, 1095-564X	Cellular basis of neuroepithelial bending during mouse spinal neural tube closure	920	TRUE			FALSE	cc-by	epmc_xml	hybrid	TRUE	Wellcome Trust	MRC		grants 051690, 058714, 068554, 087525	G0801124
PMC4430519	0	10.1371/journal.pone.0125997	PLOS	PLOS One	1932-6203	Vitamin D status predicts 30 day mortality in hospitalised cats	920.08	TRUE			FALSE	cc-by	epmc_xml	oa	TRUE	Wellcome Trust	0	0	Wellcome trust intermediate clinical fellowship grant
PMC4498604	26143919	10.1107/S1399004715008548	International Union of Crystallography	Acta Crystallographica Section D	0907-4449, 1399-0047	Structure of protease-cleaved Escherichia coli [alpha]-2-macroglobulin reveals a putative mechanism of conformational activation for protease entrapment	922.96	TRUE			FALSE	cc-by	epmc_xml	hybrid	TRUE	Wellcome Trust			093597/Z/10/Z)
PMC4323408	25669238	10.3402/gha.v8.25946	Co-Action Publishing	Global Health Action	1654-9716, 1654-9880	Community perceptions of health and chronic disease in South Indian rural transitional communities.	926.41	TRUE			FALSE	cc-by	epmc_xml	oa	TRUE	Wellcome Trust			WT084674/B/08/Z
PMC4382121	0	10.1371/journal.pone.0123028	PLOS	PLoS One	1932-6203	Changes to serum sample tube and processing methodology does not cause inter-individual variation in automated whole serum N-glycan profiling in health and disease	930.12	TRUE			FALSE	cc-by	epmc_xml	oa	TRUE	Wellcome Trust	0	0	WT097943MA
PMC4603017	26200614	10.1097/MD.0000000000001134	Wolters Kluwer	Medicine	0025-7974, 1536-5964	Molecular Analyses Define V?7.2-J?33+ MAIT Cell Depletion in HIV Infection: A Caseâ€“Control Study	931.9	TRUE			FALSE	cc-by	epmc_xml	oa	TRUE	Wellcome Trust				091663/Z/10/Z
PMC4498606	26143927	10.1107/S1399004715009220	International Union of Crystallography	Acta Crystallographica. Section D: Biological Crystallography	0907-4449, 1399-0047	From bacterial to human diÂ­hydrouridine synthase: automated structure determination	932.17	TRUE			FALSE	cc-by	epmc_xml	hybrid	TRUE	Wellcome Trust	0	0	098230/Z/12/Z	0	0
PMC4361455	25296657	10.1177/1087057114552623	SAGE	Journal of Biomolecular Screening	1087-0571, 1552-454X	A New Experimental Model for Assessing Drug Efficacy against Trypanosoma cruzi Infection Based on Highly Sensitive In Vivo Imaging	939.73	TRUE			FALSE	cc-by	epmc_xml	hybrid	TRUE	Wellcome Trust			92573
PMC4479086	26108367	10.1186/s40478-015-0212-4	Biomed Central	Acta Neuropathologica Communications	2051-5960	Wild type human TDP-43 potentiates ALS-linked mutant TDP-43 driven progressive motor and cortical neuron degeneration with pathological features of ALS	942.3	TRUE			FALSE	cc-by	epmc_xml	oa	TRUE	Wellcome Trust	MRC		WT089701AIA
PMC4479315	26108573	10.1186/s40478-015-0218-y	Springer	Acta Neuropathologica Communications	2051-5960	Dipeptide repeat protein inclusions are rare in the spinal cord and almost absent from motor neurons in C9ORF72 mutant amyotrophic lateral sclerosis and are unlikely to cause their degeneration	942.3	TRUE			FALSE	cc-by	epmc_xml	oa	TRUE	Wellcome Trust			89701
PMC4382188	25830774	10.1371/journal.pone.0123649	PLOS	PLOS ONE	1932-6203	Dose-dependent effects of allopurinol on human foreskin fibroblast cells and human umbilical vein endothelial cells under hypoxia	943.92	TRUE			FALSE	cc-by	epmc_xml	oa	TRUE	Wellcome Trust	CRUK			097945/B/11/Z	C99667/A12918
PMC4567016	26108357	10.1002/cam4.477	Wiley	Cancer Medicine	2045-7634	Comet Assay Measures of DNA Damage as Biomarkers of Irinotecan Response in Colorectal Cancer In Vitro and In Vivo	946	TRUE			FALSE	cc-by	epmc_xml	oa	TRUE	Cancer Research UK	0	0	Cancer Research UK - (Experimental Cancer Medicine Centre grant [C325/A15575])	0	0
PMC4486961	26130263	10.1038/srep11729	Nature Publishing Group	Scientific Reports	2045-2322	Signatures of positive selection in East African Shorthorn Zebu: A genome-wide single nucleotide polymorphism analysis	950.4	TRUE			FALSE	cc-by	epmc_xml	oa	TRUE	Wellcome
PMC4326798	25516594	10.1074/jbc.m114.622498		The Journal of Biological Chemistry	0021-9258, 1083-351X	Single molecule analysis of functionally asymmetric G protein-coupled receptor (GPCR) oligomers reveals diverse spatial and structural assemblies	951.96	TRUE			FALSE	cc-by	epmc_xml	hybrid	TRUE	BBSRC/Wellcome Trust			BB/1008004/1; 082101/Z/07/Z
PMC4414211	25960916	10.1155/2015/381281	Hindawi	Parkinson's Disease	2090-8083, 2042-0080	Neurophysiology of Drosophila models of Parkinsonâ€™s disease	962.86	TRUE			FALSE	cc-by	epmc_xml	oa	TRUE	Wellcome Trust	Wellcome Trust	0	097829/Z/11/A	Biomedical Vacation Scholarship	0
PMC4275206	25535746	10.1371/journal.pone.0114575	PLOS	PLOS ONE	1932-6203	Accumulation of self-reactive naÃ¯ve and memory B cells reveals sequential defects in B cell tolerance checkpoints in SjÃ¶grenâ€™s syndrome	963.66	TRUE			FALSE	cc-by	epmc_xml	oa	TRUE	Arthritis Research UK
PMC4305370	25460248	10.1016/j.scr.2014.10.007	Elsevier	Stem Cell Research	1873-5061, 1876-7753	Satellite cells derived from the mdx murine model of Duchenne muscular dystrophy retain their muscle regenerative capacity	964	TRUE			FALSE	cc-by	epmc_xml	oa	TRUE	Wellcome Trust	MRC		084241/Z/07/Z	G0700307
PMC4255825	25428953	10.14814/phy2.12231	Wiley	Physiological Reports	2051-817X	Remote ischaemic preconditioning of cardiomyocytes inhibits the mitochondrial permeablity transition pore independently of calcium-loading or sarckatp channels	965	TRUE			FALSE	cc-by	epmc_xml	oa	TRUE	British Heart Foundation	0	0	Mechanistic insights into the role of calcium loading in cardioprotection: a study using a novel cellular model of ischaemic preconditioning (PG/08/097/26073)	0	0
PMC4521287	25946119	10.1021/jacs.5b03730	ACS	Journal of the American Chemical Society	0002-7863, 1520-5126	Selective Chemical Labeling of Natural T Modifications in DNA	968.68	TRUE			FALSE	cc-by	epmc_xml	hybrid	TRUE	0	0	0	0	0	0
PMC4388264	25849394	10.1107/S1399004715001388	International Union of Crystallography	Acta Crystallographica Section D Biological Crystallography	0907-4449, 1399-0047	ANS complex of St John's wort PR-10 protein with 28 copies in the asymmetric unit: a fiendish combination of pseudosymmetry with tetartohedral twinning	972.64	TRUE			FALSE	cc-by	epmc_xml	hybrid	TRUE	0	0	0	0	0	0
PMC4564392	26448913	10.1016/j.nicl.2015.07.002	Elsevier	Neuroimage: Clinical	2213-1582	Characterising the Grey Matter Correlates of Leukoaraiosis in Cerebral Small Vessel Disease	978.48	TRUE			FALSE	cc-by	epmc_xml	oa	TRUE	WT
PMC4237437	25409504	10.1371/journal.pone.0113568	PLOS	PLoS ONE	1932-6203	Biochemical and Structural Characterization of Mycobacterial Aspartyl-tRNA Synthetase AspS, a Promising TB Drug Target	981.816	TRUE			FALSE	cc-by	epmc_xml	oa	TRUE	Wellcome Trust	MRC	0	081569/Z/06/Z	MR/K012118/1	0
PMC4370846	25799414	10.1371/journal.pone.0121492	PLOS	PLoS ONE	1932-6203	Mycobacterial dihydrofolate reductase inhibitors identified using chemogenomic methods and in vitro validation	981.816	TRUE			FALSE	cc-by	epmc_xml	oa	TRUE	Wellcome Trust	MRC	0	681569/Z/06/Z	MR/K012118/1	0
PMC4338182	25706870	10.1371/journal.pone.0118593	PLOS	PLoS ONE	1932-6203	The Roles of Integrins in Function of Human Neutrophils after their Migration through Endothelium into Interstitial Matrix	981.816	TRUE			FALSE	cc-by	epmc_xml	oa	TRUE	British Heart Foundation	0	0	PG/08/128/26525	0	0
PMC4394146	26041943	10.1016/j.csda.2014.12.007	Elsevier	Computational Statistics and Data Analysis	0167-9473	Anatomical curve identification	984.05	TRUE			FALSE	cc-by	epmc_xml	hybrid	TRUE	Wellcome Trust			WT086901MA
PMC4180932	25264771	10.1371/journal.pone.0108372	PLOS	P L o S BiologyÂ	1932-6203	Reorganisation of the Salivary Mucin Network by Dietary Components: Insights from Green Tea Polyphenols	991.57	TRUE			FALSE	cc-by	epmc_xml	oa	TRUE
PMC4281213	25551826	10.1371/journal.pone.0116126	PLOS	PLoS One	1932-6203	You turn me cold: evidence for temperature contagion	992.34	TRUE			FALSE	cc-by	epmc_xml	oa	TRUE	Wellcome Trust			093881/Z/10/Z
PMC4146515	25162539	10.1371/journal.pone.0105302	PLOS	P L o S Biology	1932-6203	Tea derived galloylated polyphenols cross-link purified gastrointestinal mucins	992.54	TRUE			FALSE	cc-by	epmc_xml	oa	TRUE
PMC4272291	25526617	10.1371/journal.pone.0115374	PLOS	PLoS One	1932-6203	Investigating glutamatergic mechanism in attention and impulse control using rats in a modified 5-ch	995.14	TRUE			FALSE	cc-by	epmc_xml	oa	TRUE	Wellcome Trust			WT084621/Z/08/Z
PMC4186810	25286379	10.1371/journal.pone.0108839	PLOS	P L o S One	1932-6203	Elevation of proteasomal substrate levels sensitizes cells to apoptosis induced by inhibition of proteasomal deubiquitinases	995.34	TRUE			FALSE	cc-by	epmc_xml	oa	TRUE
PMC4231104	25393410	10.1371/journal.pone.0112768	PLOS	PLoS One	1932-6203	Different effects of adding white noise on cognitive sub-, normal and super-attentive	996.55	TRUE			FALSE	cc-by	epmc_xml	oa	TRUE	Wellcome Trust			WT087749MA
PMC4268703	25830295	10.1371/journal.pone.0121271	PLOS	PLoS ONE	2041-1723	Systematic mutagenesis of genes encoding predicted autotransported proteins of Burkholderia pseudomallei identifies factors mediating virulence in mice, net intracellular replication and a novel protein conferring serum resistance.	998.4	TRUE			FALSE	cc-by	epmc_xml	hybrid	TRUE	Wellcome Trust	0	0	Wellcome Trust research grant 085972	0	0
PMC4224508	25380074	10.1371/journal.pone.0112547	PLOS	P L o S One	1932-6203	Three-dimensional model of the right atrium including the sinoatrial and atrioventricular nodes predicts classical nodal behaviours	998.53	TRUE			FALSE	cc-by	epmc_xml	oa	TRUE
PMC4259366	25486534	10.1371/journal.pone.0114725	PLOS	PLoS One	1932-6203	Glycogen synthase kinase 3 protein kinase activity is frequently elevated in human non-small cell lung cancer	999.99	TRUE			FALSE	cc-by	epmc_xml	oa	TRUE	BBSRC	Cancer Research UK		Studentship	C16929/A14402
PMC4498093	0	10.1074/jbc.M115.661280	ASBMB	Journal of Biological Chemistry	0021-9258, 1083-351X	Intracellular zinc modulates cardiac ryanodine receptor-mediated calcium release	1000	TRUE			FALSE	cc-by	epmc_xml	hybrid	TRUE		British Heart Foundation			FS/14/69/31001
PMC4495238	0	10.1523/JNEUROSCI.0323-15.2015	Society for Neuroscience	Journal of Neuroscience	0270-6474, 1529-2401	Selective gating of neuronal activity by intrinsic properties in distinct motor rhythms	1000	TRUE			FALSE	cc-by	epmc	hybrid	TRUE	Wellcome Trust			89319
PMC4319009	25368322	10.1074/jbc.M114.604397	American Society for Biochemistry and Molecular Biology	Journal of Biological Chemistry	0021-9258, 1083-351X	Small Molecules Dorsomorphin and LDN-193189 Inhibit Myostatin/GDF8 Signaling and Promote Functional Myoblast Differentiation	1003.15	TRUE			FALSE	cc-by	epmc_xml	hybrid	TRUE	Wellcome Trust				092809/Z/10/Z
PMC4375503	25670864	10.1074/jbc.M114.619270	American Society for Biochemistry and Molecular Biology	Journal of Biological Chemistry	0021-9258, 1083-351X	Structural Insights into the Autoregulation and Cooperativity of the Human Transcription Factor Ets-2	1003.49	TRUE			FALSE	cc-by	epmc_xml	hybrid	TRUE	Wellcome Trust				092809/Z/10/Z
PMC4609345	26504782	10.1155/2015/165074	Wiley	Health Expectations	2314-6133, 2314-6141	Differences in information engagement and knowledge between ?ever? and ?never? participants in colorectal cancer screening in England, 2014	1004	TRUE			FALSE	cc-by	epmc_xml	oa	TRUE	Cancer Research UK			C1418/A14134
PMC4316997	25505271	10.1074/jbc.m114.621789		The Journal of Biological Chemistry	0021-9258, 1083-351X	Complex Structure and Biochemical Characterization of the Staphylococcus aureus Cyclic Diadenylate Monophosphate (c-di-AMP)-binding Protein PstA, the Founding Member of a New Signal Transduction Protein Family.	1008.13	TRUE			FALSE	cc-by	epmc_xml	hybrid	TRUE	Wellcome Trust			100289
PMC4256164	25474696	10.1371/journal.pone.0113637	PLOS	PLoS One	1932-6203	Grip Strength across the Life Course: Normative Data from Twelve British Studies	1010.41	TRUE			FALSE	cc-by	epmc_xml	oa	TRUE	Wellcome Trust			WT099055AIA
PMC4256406	25474626	10.1371/journal.pone.0114289	PLOS	PLoS One	1932-6203	Adiposity in early, middle and later adult life and cardiometabolic risk markers in later life: findings from the British Regional Heart Study	1012.42	TRUE			FALSE	cc-by	epmc_xml	oa	TRUE	BHF			PG/10/030/28330 & RG/08/013/25942
PMC4239054	25412251	10.1371/journal.pone.0113415		PloS one	1932-6203	HIV in children in a general population sample in East Zimbabwe: prevalence, causes and effects	1012.56	TRUE			FALSE	cc-by	epmc_xml	oa	TRUE	Wellcome Trust			084401/Z/07/Z
PMC4216014	25360813	10.1371/journal.pone.0111459		PloS one	1932-6203	Raised plasma Robo4 and cardiac surgery-associated acute kidney injury	1012.56	TRUE			FALSE	cc-by	epmc_xml	oa	TRUE	British Heart Foundation; Rosetrees Trust			FS/14/6/30573; Ref:A471
PMC4384783	25636201	10.1016/j.nlm.2015.01.007	Elsevier	Neurobiology of Learning and Memory	1074-7427, 1095-9564	Impaired allocentric spatial processing in posttraumatic stress	1013	TRUE			FALSE	cc-by	epmc_xml	hybrid	TRUE	Wellcome Trust	MRC			509399
PMC4261084	25512678	10.1016/j.lmot.2014.08.002	Elsevier	Learning and Motivation	0023-9690	The effect of US signalling and the US-CS interval on backward conditioning in mice	1013.15	TRUE			FALSE	cc-by	publisher	hybrid	TRUE	Wellcome Trust				87736
PMC4245140	25426859	10.1371/journal.pone.0113402	PLOS	PLOS ONE	1932-6203	Towards engineering hormone-binding globulins as drug delivery agents	1013.7	TRUE			FALSE	cc-by	epmc_xml	oa	TRUE	0	0	0	0	0	0
PMC4230991	25393739	10.1371/journal.pone.0110997	PLOS	PLOS One	1932-6203	In SilicoÂ Design and Biological Evaluation of a Dual Specificity Kinase Inhibitor Targeting Cell Cycle Progression and Angiogenesis	1014.08	TRUE			FALSE	cc-by	epmc_xml	oa	TRUE	BBSRC	MRC	British Heart Foundation	CASE DTA	MR/L009625/1	PG/12/56/29748
PMC4326827	25505247	10.1074/jbc.M114.616664	ASBMB	Journal of Biological Chemistry	0021-9258, 1083-351X	Biophysical Studies on Interactions and Assembly of Full-size E3 Ubiquitin Ligase	1018.91	TRUE			FALSE	cc-by	epmc_xml	hybrid	TRUE	Wellcome Trust				100476/Z/12/Z
PMC4595905	26112292	10.1093/bioinformatics/btv386	Oxford University Press	Bioinformatics	1367-4803, 1367-4811	damidseq_pipeline: an automated pipeline for processing DamID sequencing datasets	1020	TRUE			FALSE	cc-by	epmc_xml	hybrid	TRUE	0	0	0	0	0	0
PMC4424403	25755298	10.1074/mcp.M114.044594	ASBMB	Molecular & Cellular Proteomics	1535-9476, 1535-9484	Quantitative proteome analysis of temporally resolved phagosomes following uptake via key phagocytic receptors	1020	TRUE			FALSE	cc-by	epmc_xml	hybrid	TRUE	Wellcome Trust	MRC			081867/Z/06/Z	097945/Z/11/Z
PMC4495289	25777524	10.1093/bioinformatics/btv114	Oxford University Press	Bioinformatics	1367-4803, 1367-4811	WGBSSuite: Simulating Whole Genome Bisulphite Sequencing data and benchmarking differential DNA methylation analysis tools	1020	TRUE			FALSE	cc-by	epmc_xml	hybrid	TRUE	WT			097816/Z/11/A
PMC4308667	25319962	10.1093/bioinformatics/btu669	Oxford University Press	Bioinformatics	1367-4803, 1367-4811	GeneNet Toolbox for MATLAB: a flexible platform for the analysis of gene connectivity in biological networks	1020	TRUE			FALSE	cc-by	epmc_xml	hybrid	TRUE	Wellcome Trust				93941	90532
PMC4308667	25319962	10.1093/bioinformatics/btu669	Oxford University Press	Bioinformatics	1367-4803, 1367-4811	GeneNet Toolbox for MATLAB: a flexible platform for the analysis of gene connectivity in biological networks	1020	TRUE			FALSE	cc-by	epmc_xml	hybrid	TRUE	Wellcome Trust	Wellcome Trust			093941/Z/10/Z	090532/Z/09/Z
PMC4653391	26249811	10.1093/bioinformatics/btv463	Oxford University Press	Bioinformatics	1367-4803, 1367-4811	SurvCurv database and online survival analysis platform update	1020	TRUE			FALSE	cc-by	epmc_xml	hybrid	TRUE	Wellcome Trust			WT098565AIA
PMC4251986	25460003	10.1371/journal.pone.0113555	PLOS	PLoS One	1932-6203	Phosphoinositide 3-Kinase Alpha-Dependent Regulation of Branching Morphogenesis in Murine Embryonic Lung: Evidence for a Role in Determining Morphogenic Properties of FGF7	1022.47	TRUE			FALSE	cc-by	epmc_xml	oa	TRUE	Wellcome Trust	0	0	099154/Z/12/Z	0	0
PMC4550250	26308086	10.1371/journal.pone.0136213	PLOS	PLOS ONE	1932-6203	Accelerated optical projection tomography applied to in vivo imaging of zebrafish	1026	TRUE			FALSE	cc-by	epmc_xml	oa	TRUE	Wellcome Trust / British Heart Foundation	MRC		095931/Z/11/Z; SP/08/004	MR/K011561/1
PMC4547731	26302242	10.1371/journal.pone.0136179	PLOS	PLOS ONE	1932-6203	Accuracy of probabilistic linkage using the Enhanced Matching System for public health and epidemiological studies	1026	TRUE			FALSE	cc-by	epmc_xml	oa	TRUE	Wellcome Trust			097980/Z/11/Z
PMC4552867	26317864	10.1371/journal.pone.0136238	PLOS	PLOS ONE	1932-6203	Local IL-17 production exerts a protective role in murine experimental glomerulonephritis	1026	TRUE			FALSE	cc-by	epmc_xml	oa	TRUE	Wellcome Trust	MRC		083688/z/07/z
PMC4549247	26305214	10.1371/journal.pone.0136566	PLOS	PLOS ONE	1932-6203	NDR kinases are essential for somitogenesis and cardiac looping during mouse embryonic development	1026	TRUE			FALSE	cc-by	epmc_xml	oa	TRUE	Wellcome Trust			090090/Z/09/Z
PMC4564281	26352146	10.1371/journal.pone.0137685	PLOS	PLOS ONE	1932-6203	Optimism bias in fans and sports reporters	1026	TRUE			FALSE	cc-by	epmc_xml	oa	TRUE	Wellcome Trust			WT106931MA
PMC4546655	26295838	10.1371/journal.pone.0136152	PLOS	PLOS ONE	1932-6203	Using observational data to estimate the effect of hand washing and clean delivery kit use by birth attendants on maternal deaths after home deliveries in rural Bangladesh, India and Nepal	1026	TRUE			FALSE	cc-by	epmc_xml	oa	TRUE	Wellcome Trust			085417MA/Z/08/Z
PMC4339681	25438770	10.1016/j.bmc.2014.09.036	Elsevier	Bioorganic & Medicinal Chemistry	0968-0896, 1464-3391	2-And 3-substituted imidazo[1,2-a]pyrazines as inhibitors of bacterial type IV secretion	1027.7	TRUE			FALSE	cc-by	publisher	hybrid	TRUE	Wellcome Trust	BBSRC		096617/Z/11/Z	BBS/SE/2006/1326/9; BBS/K/2005/12145; (BB/D005469/1
PMC4215396	25379430	10.1016/j.nicl.2014.08.005	Elsevier	NeuroImage: Clinical	2213-1582	Preterm birth and structural brain alterations in early adulthood	1028.49	TRUE			FALSE	cc-by	epmc_xml	oa	TRUE	Wellcome Trust			065699/Z/01/Z
PMC4575205	26382239	10.1371/journal.pone.0137834	PLOS	PLOS ONE	1932-6203	Evidence for reduced drug susceptibility without emergence of major protease mutations following protease inhibitor monotherapy failure in the SARA trial	1029	TRUE			FALSE	cc-by	epmc_xml	oa	TRUE	Wellcome Trust	MRC		WT093722MA	600344
PMC4596480	26445281	10.1371/journal.pone.0140171	PLOS	PLOS ONE	1932-6203	Modelling Blood Flow and Metabolism in the Preclinical Neonatal Brain during and Following Hypoxic-Ischaemia	1029	TRUE			FALSE	cc-by	epmc_xml	oa	TRUE	Wellcome Trust			088429/Z/09/Z
PMC4545825	26287807	10.1371/journal.pone.0133618	PLOS	PLoS One	1932-6203	Implications of Cardiovascular Disease Risk Assessment Using the WHO/ISH Risk Prediction Charts in Rural India	1030.14	TRUE			FALSE	cc-by	epmc_xml	oa	TRUE	Wellcome Trust				WT088877/Z/09/Z
PMC4269406	25517119	10.1371/journal.pone.0114626	PLOS	PLOS ONE	1932-6203	Formyl Peptide Receptor as a novel therapeutic target for anxiety-related disorders	1030.46	TRUE			FALSE	cc-by	epmc_xml	oa	TRUE	Wellcome Trust			86867
PMC4312028	25635965	10.1371/journal.pone.0115355	PLOS	PLOS ONE	1932-6203	Visual inspection after acetic acid (VIA) is highly heterogeneous in primary cervical screening in Amazonian Peru	1030.46	TRUE			FALSE	cc-by	epmc_xml	oa	TRUE	Cancer Research UK			EMSG1D5R
PMC4503731	26176222	10.1371/journal.pone.0132565	PLOS	PLOS One	1932-6203	Cross Sectional and Longitudinal Associations between Cardiovascular Risk Factors and Age Related Macular Degeneration in the EPIC-Norfolk Eye Study	1030.54	TRUE			FALSE	cc-by	epmc_xml	oa	TRUE	0	0	0	0	0	0
PMC4272306	25526367	10.1371/journal.pone.0115213	PLOS	P L o S One	1932-6203	Microtubule-dependent modulation of adhesion complex composition	1032.04	TRUE			FALSE	cc-by	epmc_xml	oa	TRUE
PMC4476701	26098299	10.1371/journal.pone.0129059	PLOS	PLOS One	1932-6203	Host Subtraction, Filtering and Assembly Validations for Novel Viral Discovery Using Next Generation Sequencing Data	1032.11	TRUE			FALSE	cc-by	epmc_xml	oa	TRUE	0	0	0	0	0	0
PMC4237458	25409445	10.1371/journal.pone.0113750	PLOS	PLoS One	1932-6203	Fine Tuning of CaV1.3 Ca2+Â Channel Properties in Adult Inner Hair Cells Positioned in the Most Sensitive Region of the Gerbil Cochlea	1032.24	TRUE			FALSE	cc-by	epmc_xml	oa	TRUE	Wellcome Trust	#REF!	#REF!	WT091895MA	#REF!	#REF!
PMC4557947	0	10.1371/journal.pone.0136717	PLOS	PLOS ONE	1932-6203	Vaccination expands antigen-specific CD4+ memory T cells and mobilizes bystander central memory T cells	1032.24	TRUE			FALSE	cc-by	epmc_xml	oa	TRUE	Leukaemia & Lymphoma Research			8028
PMC4510387	26197235	10.1371/journal.pone.0128163	PLOS	PLoS One	1932-6203	Foam Cell Formation In Vivo Converts Macrophages to a Pro-Fibrotic Phenotype	1032.95	TRUE			FALSE	cc-by	epmc_xml	oa	TRUE	British Heart Foundation			CH95001
PMC4226572	25384012	10.1371/journal.pone.0112407	PLOS	Plos One	1932-6203	Common FXIII and Fibrinogen Polymorphisms in Abdominal Aortic Aneurysms	1034.41	TRUE			FALSE	cc-by	epmc_xml	oa	TRUE	British Heart Foundation	0	0	FS/12/26/29395	0	0
PMC4334961	25693198	10.1371/journal.pone.0117016	PLOS	P L o S One	1932-6203	Increased Classical Endoplasmic Reticulum Stress is Sufficient to Reduce Chondrocyte Proliferation Rate in the Growth Plate and Decrease Bone Growth	1036.18	TRUE			FALSE	cc-by	epmc_xml	oa	TRUE
PMC4269459	25517503	10.1371/journal.pone.0115304	PLOS	PLOS ONE	1932-6203	Comparison of inter subject variability and reproducibility of whole brain proton spectroscopy	1036.67	TRUE			FALSE	cc-by	epmc_xml	oa	TRUE	0	0	0	0	0	0
PMC4537268	26274327	10.1371/journal.pone.0134865	PLOS	PLoS ONE	1932-6203	Generalised Anxiety Disorder â€“ a twin study of genetic architecture, genome-wide association and differential gene expression	1037.21	TRUE			FALSE	cc-by	epmc_xml	oa	TRUE	Wellcome Trust			081878/Z/06/Z
PMC4493012	26146992	10.1371/journal.pone.0132229	PLOS	Plos One	1932-6203	Lifetime Prevalence and Factors Associated with Head Injury among Older People in Low and Middle Income Countries: A 10/66 Study	1037.21	TRUE			FALSE	cc-by	epmc_xml	oa	TRUE	Wellcome Trust			GR066133			098439/Z/12/Z
PMC4500466	0	10.1371/journal.pone.0132240	PLOS	PLoS ONE	1932-6203	Quantatative fitness analysis identifies exo1A and other suppressors or enhancers of telomere defects in Schizosaccharomyces pombe	1038	TRUE			FALSE	cc-by	epmc_xml	oa	TRUE	Cancer Research UK	0	0	C23629	0	0
PMC4524635	26241311	10.1371/journal.pone.0134311	PLOS	PLoS One	1932-6203	Gut-microbiota-metabolite axis in early renal function decline	1038.34	TRUE			FALSE	cc-by	epmc_xml	oa	TRUE	Wellcome Trust			081878/Z/06/Z
PMC4274101	25531765	10.1371/journal.pone.0115728		PLoS One	1932-6203	Elevated Uptake of Plasma Macromolecules by Regions of Arterial Wall Predisposed to Plaque Instability in a Mouse Model	1038.92	TRUE			FALSE	cc-by	epmc_xml	oa	TRUE	British Heart Foundation			PG/08/053/25192
PMC4481470	26111016	10.1371/journal.pone.0130500	PLOS	PLOS ONE	1932-6203	A de novo Assembly of the Common Frog (Rana temporaria) Transcriptome and Comparison of Transcription Following Exposure to Ranavirus and Batrachochytrium dendrobatidis	1039.5	TRUE			FALSE	cc-by	epmc_xml	oa	TRUE	Wellcome Trust	BBSRC		WT097835MF, WT101650MA	BB/K003240/1
PMC4451072	26030924	10.1371/journal.pone.0128381	PLOS	PLOS ONE	1932-6203	A linear epitope in the N-terminal domain of CCR5 and its interaction with antibody	1039.5	TRUE			FALSE	cc-by	epmc_xml	oa	TRUE	Wellcome Trust	EPSRC			EP/G027005
PMC4425676	25955164	10.1371/journal.pone.0126015	PLOS	PLOS ONE	1932-6203	A Role of Myocardin Related Transcription Factor-A (MRTF-A) in Scleroderma Related Fibrosis	1039.5	TRUE			FALSE	cc-by	epmc_xml	oa	TRUE	Arthritis Research UK
PMC4412635	25919034	10.1371/journal.pone.0124193	PLOS	PLOS ONE	1932-6203	Acceptability, Precision and Accuracy of 3D Photonic Scanning for Measurement of Body Shape in a Multi-Ethnic Sample of Children Aged 5-11 Years: The SLIC Study	1039.5	TRUE			FALSE	cc-by	epmc_xml	oa	TRUE	Wellcome Trust			WT094129MA
PMC4352030	25747703	10.1371/journal.pone.0119682	PLOS	PLOS ONE	1932-6203	Action and valence modulate choice and choice-induced preference change	1039.5	TRUE			FALSE	cc-by	epmc_xml	oa	TRUE	Wellcome Trust			098362/Z/12/Z
PMC4401748	25885273	10.1371/journal.pone.0125906	PLOS	PLOS ONE	1932-6203	Alkalinity of neutrophil phagocytic vacuoles is modulated by HVCN1 and has consequences for myeloperoxidase activity	1039.5	TRUE			FALSE	cc-by	epmc_xml	oa	TRUE	Wellcome Trust	BBSRC		WT081695
PMC4526676	26244986	10.1371/journal.pone.0133251	PLOS	PLOS ONE	1932-6203	An Overrepresentation of High Frequencies in the Mouse Inferior Colliculus Supports the Processing of Ultrasonic Vocalizations	1039.5	TRUE			FALSE	cc-by	epmc_xml	oa	TRUE	Wellcome Trust
PMC4529206	26252650	10.1371/journal.pone.0135203	PLOS	PLOS ONE	1932-6203	Asking about sex in general health surveys: Comparing the methods and findings of the 2010 Health Survey for England with those of the third National Survey of Sexual Attitudes and Lifestyles.	1039.5	TRUE			FALSE	cc-by	epmc_xml	oa	TRUE	Wellcome Trust	MRC / ESRC		84840	G0701757
PMC4427507	25961297	10.1371/journal.pone.0126695	PLOS	PLOS ONE	1932-6203	BrainSignals Revisited: Simplifying a Computational Model of Cerebral Physiology	1039.5	TRUE			FALSE	cc-by	epmc_xml	oa	TRUE	Wellcome Trust	EPSRC		89914	EP/K020315/1
PMC4489836	26133560	10.1371/journal.pone.0130754	PLOS	PLOS ONE	1932-6203	Clinical Utility of a Coronary Heart Disease Risk Prediction Gene Score in UK healthy middle aged men and in the Pakistani Population	1039.5	TRUE			FALSE	cc-by	epmc_xml	oa	TRUE	British Heart Foundation	MRC		RG008/08	CASE award (1270920)
PMC4374784	25811611	10.1371/journal.pone.0122471	PLOS	PLOS ONE	1932-6203	Demonstration of the presence of the 'deleted' MIR122 gene in HepG2 cells	1039.5	TRUE			FALSE	cc-by	epmc_xml	oa	TRUE	British Heart Foundation			FS/13/6/29977, PG 008/08
PMC4429125	25965584	10.1371/journal.pone.0125079	PLOS	PLOS ONE	1932-6203	Effect of noise in intelligent cellular decision making	1039.5	TRUE			FALSE	cc-by	epmc_xml	oa	TRUE	Cancer Research UK			PROMISE-2016
PMC4388684	25849462	10.1371/journal.pone.0121786	PLOS	PLOS ONE	1932-6203	Experimental determination of the membrane topology of the Plasmodium protease Plasmepsin V	1039.5	TRUE			FALSE	cc-by	epmc_xml	oa	TRUE	Wellcome Trust			09095/Z/10/Z
PMC4373871	25807143	10.1371/journal.pone.0120766	PLOS	PLOS ONE	1932-6203	Factors that influence the way communities respond to proposals for major changes to local emergency services: a qualitative study	1039.5	TRUE			FALSE	cc-by	epmc_xml	oa	TRUE	Wellcome Trust			WT091024MA
PMC4444350	26009884	10.1371/journal.pone.0127893	PLOS	PLOS ONE	1932-6203	Generating insights from trends in newborn care practices from prospective population-based studies: examples from India Bangladesh and Nepal	1039.5	TRUE			FALSE	cc-by	epmc_xml	oa	TRUE	Wellcome Trust			085417MA/Z/08/Z
PMC4383582	25837791	10.1371/journal.pone.0123108	PLOS	PLOS ONE	1932-6203	Investigating the use of support vector machine classification on structural brain images of preterm-born teenagers as a biological marker	1039.5	TRUE			FALSE	cc-by	epmc_xml	oa	TRUE	Wellcome Trust
PMC4331538	25689281	10.1371/journal.pone.0117951	PLOS	PLOS ONE	1932-6203	Local and global limits on visual processing in schizophrenia	1039.5	TRUE			FALSE	cc-by	epmc_xml	oa	TRUE	Wellcome Trust			88219
PMC4471189	26083250	10.1371/journal.pone.0130396	PLOS	PLOS ONE	1932-6203	Male circumcision and STI acquisition in Britain: Evidence from a national probability sample survey	1039.5	TRUE			FALSE	cc-by	epmc_xml	oa	TRUE	Wellcome Trust	MRC		84840	G0701757
PMC4423836	25951190	10.1371/journal.pone.0125876	PLOS	PLOS ONE	1932-6203	Networks in Coronary Heart Disease Genetics As a Step towards Systems Epidemiology	1039.5	TRUE			FALSE	cc-by	epmc_xml	oa	TRUE	British Heart Foundation	MRC		PG/2008/008
PMC4319892	25659123	10.1371/journal.pone.0115563	PLOS	PLOS ONE	1932-6203	Neuropilin 1 is essential for gastrointestinal smooth muscle contractility and motility in aged mice	1039.5	TRUE			FALSE	cc-by	epmc_xml	oa	TRUE	British Heart Foundation			RG/11/11/29050
PMC4470590	26083449	10.1371/journal.pone.0129944	PLOS	PLOS ONE	1932-6203	Novel Kidins220/ARMS splice isoforms: potential specific regulators of neuronal and cardiovascular development	1039.5	TRUE			FALSE	cc-by	epmc_xml	oa	TRUE	Cancer Research UK			LF4605
PMC4517793	26217927	10.1371/journal.pone.0134092	PLOS	PLOS ONE	1932-6203	Partially evoked epithelial-mesenchymal transition (EMT) is associated with increased TGF? signaling within lesional scleroderma skin	1039.5	TRUE			FALSE	cc-by	epmc_xml	oa	TRUE	Arthritis Research UK			18925
PMC4355077	25756213	10.1371/journal.pone.0119421	PLOS	PLOS ONE	1932-6203	Reasons why people change their alcohol consumption in later life: Findings from the Whitehall II cohort study	1039.5	TRUE			FALSE	cc-by	epmc_xml	oa	TRUE	British Heart Foundation	MRC
PMC4452699	26035178	10.1371/journal.pone.0128830	PLOS	PLOS ONE	1932-6203	Regulation of Nav1.7: a Conserved SCN9A Natural Antisense Transcript Expressed in Dorsal Root Ganglia	1039.5	TRUE			FALSE	cc-by	epmc_xml	oa	TRUE	Arthritis Research UK / Wellcome Trust	MRC			Wolfson Inst for Biomedical Research
PMC4521932	26230510	10.1371/journal.pone.0133402	PLOS	PLOS ONE	1932-6203	Surface-Based Display of Volume-Averaged Cerebellar Imaging Data	1039.5	TRUE			FALSE	cc-by	epmc_xml	oa	TRUE	Wellcome Trust			094874/Z/10/Z
PMC4520611	26226395	10.1371/journal.pone.0134060	PLOS	PLOS ONE	1932-6203	Sustained magnetic responses in temporal cortex reflect instantaneous significance of approaching and receding sounds	1039.5	TRUE			FALSE	cc-by	epmc_xml	oa	TRUE	Wellcome Trust	MRC		098362/Z/12/Z; 091593/Z/10/Z	MR/K005464/1
PMC4476782	26098105	10.1371/journal.pone.0131065	PLOS	PLOS ONE	1932-6203	Temporally unpredictable sounds exert a context-dependent influence on evaluation of unrelated images	1039.5	TRUE			FALSE	cc-by	epmc_xml	oa	TRUE	Wellcome Trust			091593/Z/10/Z
PMC4370678	25799540	10.1371/journal.pone.0121440	PLOS	PLOS ONE	1932-6203	The Leber congenital amaurosis protein AIPL1 and EB proteins co-localize at the photoreceptor cilium	1039.5	TRUE			FALSE	cc-by	epmc_xml	oa	TRUE	Wellcome Trust			GR077929MA
PMC4527827	26248313	10.1371/journal.pone.0134490	PLOS	PLOS ONE	1932-6203	The obesogenic quality of the home environment: Associations with diet physical activity TV viewing and BMI in preschool children	1039.5	TRUE			FALSE	cc-by	epmc_xml	oa	TRUE	Cancer Research UK			C1418/A7974
PMC4465629	26062124	10.1371/journal.pone.0123416	PLOS	PLOS ONE	1932-6203	Two-stage priming of allogeneic Natural Killer cells for the treatment of patients with acute myeloid leukemia; a phase I trial	1039.5	TRUE			FALSE	cc-by	epmc_xml	oa	TRUE	Leukaemia & Lymphoma Research	MRC
PMC4529215	26252776	10.1371/journal.pone.0134976	PLOS	PLOS ONE	1932-6203	Wnt signalling promotes actin dynamics during axon remodelling through the actin-binding protein Eps8	1039.5	TRUE			FALSE	cc-by	epmc_xml	oa	TRUE	Wellcome Trust	MRC / BBSRC		078764/Z/05/2	G0802241 and C14770/2
PMC4410287	25261715	10.1016/j.ydbio.2014.09.016	Elsevier	Developmental Biology	0302-2838, 1873-7560	Sex specific retinoic acid signaling is required for the initiation of urogenital sinus bud development	1040.16	TRUE			FALSE	cc-by	publisher	hybrid	TRUE	Cancer Research UK			C13590/A10228
PMC4492579	26147748	10.1371/journal.pone.0132004	PLOS	PLoS One	1932-6203	Potent and Selective Triazole-Based Inhibitors of the Hypoxia-Inducible Factor Prolyl-Hydroxylases with Activity in the Murine Brain	1041.82	TRUE			FALSE	cc-by	epmc_xml	oa	TRUE	Wellcome Trust	British Heart Foundation			091857/Z.10/Z	PG/12/33/29546
PMC4505878	26186610	10.1371/journal.pone.0132930	PLOS	PLoS One	1932-6203	Associations between Food Outlets around Schools and BMI among Primary Students in England: A Cross-Classified Multi-Level Analysis	1042.94	TRUE			FALSE	cc-by	epmc_xml	oa	TRUE	British Heart Foundation				021/P&C/Core/2010/HPRC
PMC4532367	26262842	10.1371/journal.pone.0134645	PLOS	PLoS One	1932-6203	Heterogeneous Effects of Direct Hypoxia Pathway Activation in Kidney Cancer	1042.94	TRUE			FALSE	cc-by	epmc_xml	oa	TRUE	Wellcome Trust				090532/Z/09/Z
PMC4265759	0	10.1242/?bio.201410363	Company of Biologists	Biology Open	2046-6390	Length-dependent anisotropic scaling of spindle shape	1044	TRUE			FALSE	cc-by	epmc_xml	oa	TRUE	Cancer Research UK	Wellcome Trust	0	C40377/ A12840,WT092076
PMC4423978	25951175	10.1371/journal.pone.0125994	PLOS	Plos One	1932-6203	The breast cancer-associated glycoforms of MUC1, MUC1-Tn and sialyl-Tn, are expressed in COSMC wild-type cells and bind the C-type lectin MGL	1044	TRUE			FALSE	cc-by	epmc_xml	oa	TRUE	Breast Cancer Campaign			2011 NovPR43
PMC4163661	25171887	10.1242/bio.20149027	Company of Biologists	Biology Open	2046-6390	Syncrip/hnRNP Q influences synaptic transmission and regulates BMP signalling at the Drosophila neuromuscular synapse	1044	TRUE			FALSE	cc-by	epmc_xml	oa	TRUE	Wellcome Trust				96144
PMC4365485	25596274	10.1242/bio.201410843	Company of Biologists	Biology Open	2046-6390	TACC3â€“ch-TOG track the growing tips of microtubules independently of clathrin and Aurora-A phosphorylation	1044	TRUE			FALSE	cc-by	epmc_xml	oa	TRUE	Cancer Research UK	0	0	C25425/A15182
PMC4309951	25685707	10.1016/j.nicl.2014.12.019	Elsevier	NeuroImage: Clinical	2213-1582	Adolescents with current major depressive disorder show dissimilar patterns of age-related differences in ACC and thalamus	1045.14	TRUE			FALSE	cc-by	epmc_xml	oa	TRUE	0	0	0	0	0	0
PMC4438066	0	10.1371/journal.pone.0125998	PLOS	PLoS ONE	1932-6203	Neural differentiation modulates the vertebrate brain specific splicing program	1045.22	TRUE			FALSE	cc-by	epmc_xml	oa	TRUE	Wellcome Trust	0	0	089225/Z/09/Z	0	0
PMC4376733	25816008	10.1371/journal.pone.0115431	PLOS	PLOS One	1932-6203	Mechanisms of Gain Control by Voltage-Gated Channels in Intrinsically-Firing Neurons	1045.37	TRUE			FALSE	cc-by	epmc_xml	oa	TRUE	0	0	0	0	0	0
PMC4516286	26214306	10.1371/journal.pone.0134168	PLOS	PLoS One	1932-6203	Comparative Proteomics of Activated THP-1 Cells Infected with Mycobacterium tuberculosis Identifies Putative Clearance Biomarkers for Tuberculosis Treatment	1046.03	TRUE			FALSE	cc-by	epmc_xml	oa	TRUE	Wellcome Trust				090532/Z/09/Z
PMC4468057	26076364	10.1371/journal.pone.0128703	PLOS	PLOS One	1932-6203	Detection of Hepatitis E Virus Antibodies in Dogs in the United Kingdom	1046.17	TRUE			FALSE	cc-by	epmc_xml	oa	TRUE	0	0	0	0	0	0
PMC4521838	26230258	10.1371/journal.pntd.0003979	PLOS	PLoS Neglected Tropical Diseases	1935-2727, 1935-2735	Modelling the Contributions of Malaria, HIV, Malnutrition and Rainfall to the Decline in Paediatric Invasive Non-typhoidal Salmonella Disease in Malawi	1048.72	TRUE			FALSE	cc-by	epmc_xml	oa	TRUE	Wellcome Trust			WT092152MA
PMC4570576	25819987	10.1093/biostatistics/kxv010	Oxford University Press	Biostatistics	1465-4644, 1468-4357	A stochastic transcriptional switch model for single cell imaging data	1050	TRUE			FALSE	cc-by	epmc_xml	hybrid	TRUE	Wellcome Trust			Wellcome Trust 67252
PMC4380971	25641882	10.1002/cam4.380	Wiley	Cancer Medicine	2045-7634	The B subunit of E. coli enterotoxin (EtxB) helps control the in vivo growth of solid tumors expressing the Epstein-Barr virus latent membrane protein 2A	1051.2	TRUE			FALSE	cc-by	epmc_xml	oa	TRUE	Cancer Research UK			C8938/A8375
PMC4255321	25066001	10.1017/S0033291714000531	PLOS	PLoS One	0033-2917, 1469-8978	Associations of cannabis and cigarette use with depression and anxiety at age 18: findings from the ALSPAC cohort	1051.94	TRUE			FALSE	cc-by	epmc_xml	hybrid	TRUE	Wellcome Trust	MRC		WT87997
PMC4529192	26252389	10.1371/journal.pone.0134488	PLOS	PLOS ONE	1932-6203	Stimulation of Glia Reveals Modulation of Mammalian Spinal Motor Networks by Adenosine	1051.94	TRUE			FALSE	cc-by	epmc_xml	oa	TRUE	Wellcome Trust			097831/Z/11/Z
PMC4532445	26262844	10.1371/journal.pone.0134997	PLOS	PLOS ONE	1932-6203	Copy number variation screen identifies a rare de novo deletion at chromosome 15q13.1-13.3 in a child with language impairment	1051.96	TRUE			FALSE	cc-by	epmc_xml	oa	TRUE	Wellcome Trust			097831/Z/11/Z
PMC4545585	26287823	10.1371/journal.pone.0135894	PLOS	PLoS One	1932-6203	Possible Association of APOE Genotype with Working Memory in Young Adults	1052.03	TRUE			FALSE	cc-by	epmc_xml	oa	TRUE	Wellcome Trust	MRC	ESRC	WT096114/Z/11/Z	WT084268/Z/07/Z
PMC4339731	25710502	10.1371/journal.pone.0117816	PLOS	PLOS One	1932-6203	A Retrospective Observational Study of the Relationship between Single Nucleotide Polymorphisms Associated with the Risk of Developing Colorectal Cancer and Survival	1052.15	TRUE			FALSE	cc-by	epmc_xml	oa	TRUE	MRC	Cancer Research UK	0	MR/L01629X/1	C23434/A9805	0
PMC4356586	25760857	10.1371/journal.pone.0117855	PLOS	PLOS One	1932-6203	Examining the Feasibility of Clinical Grade CD271+Â Enrichment of Mesenchymal Stromal Cells for Bone Regeneration	1052.15	TRUE			FALSE	cc-by	epmc_xml	oa	TRUE	Wellcome Trust (WELMEC)	EPSRC	Arthritis Research UK	WT 088908/Z/09/Z	19429	0
PMC4356617	25760763	10.1371/journal.pone.0120013	PLOS	PLoS One	1932-6203	A survey of UK healthcare workers' attitudes on volunteering to help with the Ebola outbreak in West Africa	1052.83	TRUE			FALSE	cc-by	epmc_xml	oa	TRUE	Wellcome Trust			087757/Z/08/Z
PMC4382050	25830353	10.1371/journal.pone.0122332	PLOS	PLoS One	1932-6203	Retinal Vessel Segmentation: An Efficient Graph Cut Approach with Retinex and Local Phase	1052.84	TRUE			FALSE	cc-by	epmc_xml	oa	TRUE	Wellcome Trust			092668/Z/10/Z
PMC4517770	26218239	10.1371/journal.pone.0134037	PLOS	PLoS One	1932-6203	Prevalence and Characteristics of Hepatitis B Virus (HBV) Coinfection among HIV-Positive Women in South Africa and Botswana	1052.86	TRUE			FALSE	cc-by	epmc_xml	oa	TRUE	Wellcome Trust				091663/Z/10/Z
PMC4370669	25799199	10.1371/journal.pone.0118782	PLOS	PLOS One	1932-6203	Anticipated Survival and Health Behaviours in Older English Adults: Cross Sectional and Longitudinal Analysis of the English Longitudinal Study of Ageing	1053.11	TRUE			FALSE	cc-by	epmc_xml	oa	TRUE	0	0	0	0	0	0
PMC4332868	25692288	10.1371/journal.pone.0118096	PLOS	PLoS One	1932-6203	Plant virus particles carrying tumour antigen activate TLR7 and induce high levels of protective antibody	1054.48	TRUE			FALSE	cc-by	epmc_xml	oa	TRUE	Leukaemia & Lymphoma Research			Leukaemia and Lymphoma Research 8027
PMC4489434	26131691	10.1371/journal.pone.0130078	PLOS	PLoS One	1932-6203	Methotrexate Is a JAK/STAT Pathway Inhibitor	1055.36	TRUE			FALSE	cc-by	epmc_xml	oa	TRUE	Wellcome Trust	#REF!	#REF!	Equipment award to the Sheffield RNAi Screening Facility and SB (Ref: 084757)	#REF!	#REF!
PMC4383554	25837519	10.1371/journal.pone.0122166	PLOS	PLoS ONE	1932-6203	Size distribution of air bubbles entering the brain during cardiac surgery	1055.53	TRUE			FALSE	cc-by	epmc_xml	oa	TRUE	British Heart Foundation	0	0	British Heart Foundation Intermediate Basic Science Fellowship FS/10/46/28350 Forecasting brain injury in the virtual patient	0	0
PMC4498896	26161748	10.1371/journal.pone.0131577	PLOS	PLOS One	1932-6203	The LMO2 -25 region harbours GATA2-dependent myeloid enhancer and RUNX-dependent T-lymphoid repressor activity	1056.06	TRUE			FALSE	cc-by	epmc_xml	oa	TRUE	0	0	0	0	0	0
PMC4256439	0	10.1371/journal.pone.0114462	PLOS	PLoS ONE	1932-6203	Accurate measurement of mitochondrial DNA deletion level and copy numner differences in human skeletal muscle	1056.76	TRUE			FALSE	cc-by	epmc_xml	oa	TRUE	Wellcome Trust	0	0	096919/Z/11/Z	0	0
PMC4207765	0	10.1371/journal.pone.0111235	PLOS	PLOS1	1932-6203	Identifying good responders to glucose lowering therapy in type 2 diabetes: implications for stratified medicine.	1058.34	TRUE			FALSE	cc-by	epmc_xml	oa	TRUE	Wellcome Trust	0	0	098395/Z/12/Z	0	0
PMC4416926	25932631	10.1371/journal.pone.0124277	PLOS	PLoS One	1932-6203	The Structure of the T190M Mutant of Murine alpha-Dystroglycan at High Resolution: Insight into the Molecular Basis of a Primary Dystroglycanopathy	1059.05	TRUE			FALSE	cc-by	epmc_xml	oa	TRUE	Wellcome Trust			WT097350
PMC4260857	25490401	10.1371/journal.pone.0114405	PLOS	PLOS One	1932-6203	The Effect of pH and Ion Channel Modulators on Human Placental Arteries	1059.41	TRUE			FALSE	cc-by	epmc_xml	oa	TRUE	BHF			FS/05/049
PMC4492893	26147467	10.1371/journal.pone.0131130	PLOS	PLOS One	1932-6203	Congenital Anomalies in Children of Mothers Taking Antiepileptic Drugs with and without Periconceptional High Dose Folic Acid Use: A Population-Based Cohort Study.	1059.51	TRUE			FALSE	cc-by	epmc_xml	oa	TRUE	wellcome
PMC4476783	26098361	10.1371/journal.pone.0131016	PLOS	PLOS One	1932-6203	Alcohol-Preferring Rats Show Goal Oriented Behaviour to Food Incentives but Are Neither Sign-Trackers Nor Impulsive	1061.88	TRUE			FALSE	cc-by	epmc_xml	oa	TRUE	0	0	0	0	0	0
PMC4477937	26103636	10.1371/journal.pone.0130036	PLOS	PLOS One	1932-6203	Alpha-2-Macroglobulin Is Acutely Sensitive to Freezing and Lyophilization: Implications for Structural and Functional Studies	1062.04	TRUE			FALSE	cc-by	epmc_xml	oa	TRUE	0	0	0	0	0	0
PMC4673239	26320186	10.18632/oncotarget.4879	Impact Journals LLC	Impact Journals LLCOncoTarget	1949-2553	Cenp-E inhibitor GSK923295: novel synthetic route and use as a tool to generate aneuploidy	1062.07	TRUE			FALSE	cc-by	epmc_xml	hybrid	TRUE
PMC4356519	25761107	10.1371/journal.pone.0118027	PLOS	PLOS ONE	1932-6203	Evaluating the Consent Preferences of UK Research Volunteers for Genetic and Clinical Studies	1063	TRUE			FALSE	cc-by	epmc_xml	oa	TRUE	Wellcome Trust			099194/Z/12/Z
PMC4474892	26091104	10.1371/journal.pone.0130094	PLOS	PlosONE	1932-6203	Subregional hippocampal morphology and psychiatric outcome in adolescents who were born very preterm	1063.14	TRUE			FALSE	cc-by	epmc_xml	oa	TRUE	Wellcome Trust			065699/Z/01/Z
PMC4495034	26151929	10.1371/journal.pone.0131885	PLOS	PLoS One	1932-6203	Association between Maternal Depression Symptoms across the First Eleven Years of Their Childâ€™s Life and Subsequent Offspring Suicidal Ideation	1064.53	TRUE			FALSE	cc-by	epmc_xml	oa	TRUE	Wellcome Trust	MRC		WT097822/Z/11/ZR	WT092731
PMC4534318	26266935	10.1371/journal.pone.0135271	PLOS	PLoS One	1932-6203	Child allergic symptoms and well-being at school: findings from ALSPAC a UK cohort study	1064.53	TRUE			FALSE	cc-by	epmc_xml	oa	TRUE	MRC	Wellcome Trust		WT102215/2/13/2	WT089979
PMC4432029	25131498	10.1016/j.yexcr.2014.08.011	Elsevier	Experimental Cell research	0014-4827, 1090-2422	Having a direct look: Analysis of DNA damage and repair mechanisms by next generation sequencing.	1066.51	TRUE			FALSE	cc-by	epmc_xml	hybrid	TRUE	Wellcome Trust				090944/Z/09/Z
PMC4303431	25612317	10.1371/journal.pone.0116863	PLOS	PLOS One	1932-6203	Height and bone mineral density are associated with naevus count supporting the importance of growth in melanoma susceptibility	1066.86	TRUE			FALSE	cc-by	epmc_xml	oa	TRUE	Wellcome Trust			081878/Z/06/Z
PMC4493829	26175912	10.1038/sdata.2015.35	Nature Publishing Group	Scientific Data	2052-4463	The global compendium of Aedes aegypti and Ae. albopictus occurrence	1068	TRUE			FALSE	cc-by	epmc_xml	oa	TRUE	Wellcome Trust				95066
PMC4236742	25407686	10.1038/srep07107	Nature Publishing Group	Scientific Reports	2045-2322	The role of the helper lipid on the DNA transfection efficiency of lipopolyplex formulations	1068	TRUE			FALSE	cc-by	epmc_xml	oa	TRUE	Wellcome Trust	EPSRC		WT094348MA	EP/G061866/1
PMC4245811	25429530	10.1038/srep07104	Nature Publishing Group	Scientific Reports	2045-2322	Direct evidence of milk consumption from ancient human dental calculus	1068	TRUE			FALSE	cc-by	epmc_xml	oa	TRUE	Wellcome Trust	0	0	097829/Z/11/A	0	0
PMC4608777	26473733	10.1371/journal.pone.0140125	PLOS	PLoS ONE	1932-6203	Seriological evidence of MERS-CoV antibodies etc	1068.38	TRUE			FALSE	cc-by	epmc_xml	oa	TRUE	Wellcome Trust			085308/Z/08/Z
PMC4472929	26086423	10.1371/journal.pone.0130390	PLOS	PLoS One	1932-6203	A systematic review of criminal recidivism rates worldwide: current difficulties and recommendations for best practice	1068.41	TRUE			FALSE	cc-by	epmc_xml	oa	TRUE	Wellcome Trust				95806
PMC4338296	25706862	10.1371/journal.pone.0118202	PLOS	PLOS One	1932-6203	Accurate Measurement of 5-Methylcytosine and 5-Hydroxymethylcytosine in Human Cerebellum DNA by Oxidative Bisulfite on an Array (OxBS-Array)	1068.96	TRUE			FALSE	cc-by	epmc_xml	oa	TRUE	0	0	0	0	0	0
PMC4401716	25884495	10.1371/journal.pone.0125438	PLOS	PLOS One	1932-6203	Virtual-'Light-Sheet' Single-Molecule Localisation Microscopy Enables Quantitative Optical Sectioning for Super-Resolution Imaging	1069.73	TRUE			FALSE	cc-by	epmc_xml	oa	TRUE	0	0	0	0	0	0
PMC4262444	25493563	10.1371/journal.pone.0114998	PLOS	PLoS One	1932-6203	The C. elegans TPR Containing Protein, TRD-1, Regulates Cell Fate Choice in the Developing Germ Line and Epidermis	1070.38	TRUE			FALSE	cc-by	epmc_xml	oa	TRUE	Wellcome Trust				97305
PMC4207928	24601690	10.1210/jc.2013-3844	Endocrine Society	Journal of Clinical Endocrinology and Metabolism	0021-972X, 1945-7197	Thioredoxin reductase 2 (TXNRD2) mutation associated with familial glucocorticoid deficiency (FGD)	1070.6	TRUE			FALSE	cc-by	epmc_xml	hybrid	TRUE	Wellcome Trust			095984/Z/11/Z
PMC4340615	25714554	10.1371/journal.pone.0117796	PLOS	PLOS One	1932-6203	Tinned Fruit Consumption and Mortality in Three Prospective Cohorts	1071.43	TRUE			FALSE	cc-by	epmc_xml	oa	TRUE	0	0	0	0	0	0
PMC4270791	25522217	10.1371/journal.pone.0114870	PLOS	PLOS ONE	1932-6203	Congenital and postnatal CMV and EBV acquisition in HIV-infected Zimbabwean infants	1073.21	TRUE			FALSE	cc-by	epmc_xml	oa	TRUE	Wellcome Trust			093768/Z/10/Z
PMC4376912	25815718	10.1371/journal.pone.0119366	PLOS	P L o S One	1932-6203	The ubiquitin ligase UBE3A dampens ERK pathway signalling in HPV E6 transformed HeLa cells	1075.65	TRUE			FALSE	cc-by	epmc_xml	oa	TRUE
PMC4553904	25563935	10.1016/j.concog.2014.12.003	Elsevier	Consciousness and Cognition	1053-8100, 1090-2376	A Duet for One	1076.75	TRUE			FALSE	cc-by	epmc_xml	hybrid	TRUE	Wellcome Trust			Karl Friston
PMC4275277	25536067	10.1371/journal.pone.0115670		PLOS ONE	1932-6203	On the role of the patella, ACL and joint contact forces in the extension of the knee	1078	TRUE			FALSE	cc-by	epmc_xml	oa	TRUE	Wellcome Trust/EPSRC			088844/Z/09/Z
PMC4450265	25994354	10.1098/rsob.140220	Royal Society Publishing	Open Biology	2046-2441	Structural constraints on the evolution of the collagen fibril: convergence on a 1014-residue COL domain	1080	TRUE			FALSE	cc-by	epmc_xml	oa	TRUE	0	0	0	0	0	0
PMC4593668	26400472	10.1098/rsob.150105	Royal Society	Open Biology	2046-2441	Bifunctional cross linking ligands for transthyretin	1080	TRUE			FALSE	cc-by	epmc_xml	oa	TRUE	Wellcome Trust			082989/Z/07/A
PMC4374765	25811453	10.1371/journal.pone.0120101	PLOS	PLoS One	1932-6203	The relationship between fearfulness, GABA+, and fear-related BOLD responses in the insula	1080.5	TRUE			FALSE	cc-by	epmc_xml	oa	TRUE	Wellcome Trust			WT090199
PMC4467193	25910937	10.1242/?bio.201410884	Company of Biologists	Biology Open	2046-6390	VEGF-A isoform-specific regulation of calcium ion flux, transcriptional activation and endothelial cell migration	1081.03	TRUE			FALSE	cc-by	epmc_xml	oa	TRUE	BHF	MRC	0	PG/12/56/29748	MR/G1002076	0
PMC4368632	25793374	10.1371/journal.pone.0121285	PLOS	PLoS ONE	1932-6203	Steady-state modulation of voltage-gated K+ channels in rat arterial smooth muscle by cyclic AMP-dependent protein kinase and protein phosphatase 2B	1086	TRUE			FALSE	cc-by	epmc_xml	oa	TRUE	British Heart Foundation	0	0	Regulation of arterial voltage-gated K+ channels by vasoactive agents and glucose. Ref. RG06/008	0	0
PMC4561815	26441961	10.3389/fimmu.2015.00456	Frontiers	Frontiers in Immunology	1664-3224	Development and function of protective and pathologic memory CD4 T cells	1088.69	TRUE			FALSE	cc-by	epmc_xml	oa	TRUE
PMC4522516	26284013	10.3389/fpsyg.2015.01090	Frontiers Research Foundation	Frontiers in Psychology	1664-1078	The relation between receptive grammar and procedural, declarative, and working memory in specific language impairment	1088.82	TRUE			FALSE	cc-by	epmc_xml	oa	TRUE
PMC4465326	26061067	10.1371/journal.pone.0127756	PLOS	PLoS One	1932-6203	Associations of pet ownership with wheezing and lung function in childhood: findings from a UK birth cohort	1090.96	TRUE			FALSE	cc-by	epmc_xml	oa	TRUE	Wellcome Trust	MRC		WT102215/2/13/2
PMC4416709	25933397	10.1371/journal.pone.0126608	PLOS	PLoS One	1932-6203	Diagnostic intervals and its association with breast, prostate, lung and colorectal cancer survival	1090.97	TRUE			FALSE	cc-by	epmc_xml	oa	TRUE	Cancer Research UK			C41354/A13273
PMC4363731	25781997	10.1371/journal.pone.0120363	PLOS	PLoS One	1932-6203	Mass Transport Properties of The Rabbit Aortic Wall	1091.28	TRUE			FALSE	cc-by	epmc_xml	oa	TRUE	BHF			RG11/5/28743
PMC4373267	25859236	10.3389/fpsyg.2015.00338	Frontiers	Frontiers in Psychology	1664-1078	Chronologically organised structure in autobiographical memory search	1094.4	TRUE			FALSE	cc-by	epmc_xml	oa	TRUE	Wellcome Trust			094859/Z/10/Z
PMC4401548	25886387	10.1371/journal.pone.0123532	PLOS	PLoS One	1932-6203	Rare Variants in MYD88, IRAK4 and IKBKG and Susceptibility to Invasive Pneumococcal Disease: A Population-Based Case-Control Study	1094.7	TRUE			FALSE	cc-by	epmc_xml	oa	TRUE	Wellcome Trust	Wellcome Trust			090532/Z/09/Z	076113/C/04/Z
PMC4418696	25938522	10.1371/journal.pone.0124165	PLOS	Plos One	1932-6203	False discovery rates in PET and CT studies with texture features: a systematic review	1096.78	TRUE			FALSE	cc-by	epmc_xml	oa	TRUE	Cancer Research UK
PMC4320035	0	10.1371/journal.pone.0117557	PLOS	PLoS One	1932-6203	Attenuation of Congenital Portosystemic Shunt Reduces Inflammation in Dogs	1097.08	TRUE			FALSE	cc-by	epmc_xml	oa	TRUE	Wellcome Trust	0	0	Wellcome Trust Intermediate Clinical Fellowship
PMC4479794	0	10.3389/fimmu.2015.00330	Frontiers	Frontiers in Immunology	1664-3224	Human and mouse mononuclear phagocyte networks: a tale of two species?	1098.26	TRUE			FALSE	cc-by	epmc_xml	oa	TRUE	Wellcome Trust	0	0	88555/Z/09/Z	0	0
PMC4379172	25822951	10.1371/journal.pone.0119880	PLOS	PLoS One	1932-6203	Development of an In Vitro Assay and Demonstration of Plasmodium berghei Liver-Stage Inhibition by TRAP-Specific CD8+ T Cells	1100.1	TRUE			FALSE	cc-by	epmc_xml	oa	TRUE	Wellcome Trust				104750
PMC4548307	0	10.3389/fncel.2015.00330	Frontiers	Frontiers in Cellular Neuroscience	1662-5102	Blockade of pathological retinal ganglion cell hyperactivity improves optogenetically evoked light responses in rd1 mice	1103.16	TRUE			FALSE	cc-by	epmc_xml	oa	TRUE	Wellcome Trust	0	0	096975/Z/11/Z	0	0
PMC4517378	26284072	10.3389/fimmu.2015.00388	Frontiers	Frontiers in Immunology	1664-3224	Regulation of Lipid Specific and Vitamin Specific Non-MHC Restricted T Cells by Antigen Presenting Cells and Their Therapeutic Potentials	1104.14	TRUE			FALSE	cc-by	epmc_xml	oa	TRUE	Cancer Research UK				C339/A17722
PMC4370580	0	10.1371/journal.pone.0121676	PLOS	PLOS One	1932-6203	Electrographic Waveform Structure Predicts Laminar Focus Location in a Model of Temporal Lobe Seizures In Vitro	1104.28	TRUE			FALSE	cc-by	epmc_xml	oa	TRUE	Wellcome Trust	0	0	098352/Z/12/Z	0	0
PMC4552633	26317613	10.1371/journal.ppat.1005141	PLOS	PLOS Pathogens	1553-7366, 1553-7374	Serine phosphorylation of HIV-1 Vpu and its binding to tetherin regulates interaction with clathrin adaptors	1107	TRUE			FALSE	cc-by	epmc_xml	oa	TRUE	Wellcome Trust			WT098049AIA
PMC4591484	0	10.3389/fpsyg.2015.01440	Frontiers	Frontiers in Neuroscience	1664-1078	Amplitude-modulated stimuli reveal auditory-visual interactions in brain activity and brain connectivity	1108.01	TRUE			FALSE	cc-by	epmc_xml	oa	TRUE	Wellcome Trust	0	0	102558/Z/13/Z	0	0
PMC4466349	26067480	10.1371/journal.pone.0129388	PLOS	PLoS ONE	1932-6203	Coordinate representations for interference reduction in motor learning	1109.59	TRUE			FALSE	cc-by	epmc_xml	oa	TRUE	Wellcome Trust	0	0	WT091547MA	WT097803MA	0
PMC4489761	26134669	10.1371/journal.pone.0131539	PLOS	PLoS ONE	1932-6203	Vitamin D Antagonises The Suppressive Effect Of Inflammatory Cytokines On CTLA-4 Expression And Regulatory Function	1109.59	TRUE			FALSE	cc-by	epmc_xml	oa	TRUE	Arthritis Research UK	0	0	DKAA RCAN14657	0	0
PMC4463001	26124758	10.3389/fimmu.2015.00302	Frontiers	Frontiers in Immunology	1664-3224	Role of innate T cells in anti-bacterial immunity	1109.66	TRUE			FALSE	cc-by	epmc_xml	oa	TRUE	Cancer Research UK			508041104
PMC4265517	25525287	10.1155/2014/529456	Hindawi Publishing Corporation	Disease Markers	0278-0240, 1875-8630	Haptoglobin duplicon, hemoglobin and vitamin C: analyses in the British women's heart and health study and Caerphilly prospective study	1111.12	TRUE			FALSE	cc-by	epmc_xml	oa	TRUE	Wellcome Trust			WT92731
PMC4591478	26483724	10.3389/fpsyg.2015.01465	Frontiers Media SA	Psychology for Clinical Settings	1664-1078	Priming of conflicting motivational orientations in heavy drinkers: robust effects on self-report but not implicit measures	1113.28	TRUE			FALSE	cc-by	epmc_xml	oa	TRUE	Wellcome Trust			086247/Z/08/Z
PMC4331696	25810777	10.1186/1758-2946-7-S1-S6	Chemistry Central	Journal of Cheminformatics	1758-2946	Optimising chemical named entity recognition with pre-processing analytics, knowledge-rich features and heuristics	1122	TRUE			FALSE	cc-by	epmc_xml	oa	TRUE
PMC4534312	26102480	10.1016/j.ydbio.2015.06.017	Elsevier	Developmental Biology	0012-1606, 1095-564X	A critical role for the chromatin remodeller CHD7 in anterior mesoderm during cardiovascular development	1122.58	TRUE			FALSE	cc-by	epmc_xml	hybrid	TRUE	British Heart Foundation			FS/10/28680, RG/15/13/28570, PG/12/44/29658
PMC4457359	25936759	10.1016/j.jtbi.2015.04.027	Elsevier	Journal of Theoretical Biology	0022-5193, 1095-8541	A coarse-grained biophysical model of sequence evolution and the population size dependence of the speciation rate	1124	TRUE			FALSE	cc-by	epmc_xml	hybrid	TRUE	Cancer Research UK / Wellcome Trust	MRC		The Crick	MC_U117573805/2
PMC4451476	25930216	10.1016/j.bbr.2015.04.035	Elsevier	Behavioural Brain Research	0166-4328, 1872-7549	Spatial learning by mice in three dimensions	1124	TRUE			FALSE	cc-by	epmc_xml	hybrid	TRUE	Wellcome Trust	BBSRC			BB/J009792/1 and BB/F015968/1
PMC4534181	26011795	10.1002/pro.2706	Wiley	Protein Science	0961-8368, 1469-896X	An integrative approach combining ion mobility mass spectrometry, X-ray crystallography and NMR spectroscopy to study the conformational dynamics of ?1-antitrypsin upon ligand binding	1125	TRUE			FALSE	cc-by	epmc_xml	hybrid	TRUE	Wellcome Trust	MRC			MR/J00386
PMC4143561	25091430	10.1186/1471-2164-15-649	BioMed Central	BMC Genomics	1471-2164	Comparison of gene expression microarray data with count-based RNA measurements informs microarray interpretation	1129.2	TRUE			FALSE	cc-by	epmc_xml	oa	TRUE	0	0	0	0	0	0
PMC4304242	25559746	10.1186/1475-925X-13-S2-S1	BioMed Central	BioMedical Engineering OnLine	1475-925X	Semi-supervised learning of causal relations in biomedical scientific discourse	1130.4	TRUE			FALSE	cc-by	epmc_xml	oa	TRUE
PMC4156502	25007214	10.4161/rna.29196	Landes Bioscience	RNA Biology	1547-6286, 1555-8584	Contributions of transcription and mRNA decay to gene expression dynamics of fission yeast in response to oxidative stress	1137.88	TRUE			FALSE	cc-by	epmc_xml	hybrid	TRUE	Wellcome Trust			095598/Z/11/Z
PMC4557543	0	10.1016/j.bandl.2014.11.006	Elsevier	Brain and Language	0093-934X, 1090-2155	EEG potentials associated with artificial grammar learning in the primate brain	1138.41	TRUE			FALSE	cc-by	epmc_xml	hybrid	TRUE	Wellcome Trust	0	0	102961/Z/13/Z	0	0
PMC4430133	25576774	10.1016/j.resmic.2014.12.005	Elsevier	Research in Microbiology	0923-2508, 1769-7123	Mobile genetic elements in Clostridium difficile and their role in genome function	1140	TRUE			FALSE	cc-by	epmc_xml	hybrid	TRUE	Wellcome Trust	MRC		G0601176	G0601176
PMC4251999	25425237	10.1128/mBio.02158-14	American Society for Mircrobiology	mBio	2150-7511	Bacterial Phylogenetic reconstruction form whole genomes is robust to recombination but demographic inference is not	1140.06	TRUE			FALSE	cc-by	epmc_xml	oa	TRUE	Wellcome Trust				101237
PMC4473851	26106549	10.1016/j.nicl.2015.04.018	Elsevier	NeuroImage: Clinical	2213-1582	Cortical thickness, surface area, and folding alterations in male youths with conduct disorder and varying levels of callousâ€“unemotional traits	1143.26	TRUE			FALSE	cc-by	epmc_xml	oa	TRUE	0	0	0	0	0	0
PMC4373788	25682026	10.1016/j.atherosclerosis.2015.01.028	Elsevier	Atherosclerosis	0021-9150, 1879-1484	Would raising the total cholesterol diagnostic cut-off from 7.5mmol/L to 9.3mmol/L improve detection rate of patients with monogenic Familial Hypercholesterolaemia?	1151	TRUE			FALSE	cc-by	epmc_xml	hybrid	TRUE	British Heart Foundation	MRC		CH/92025; PG08/008	K013351; ID85374
PMC4375644	25844319	10.1016/j.nicl.2015.02.012	Elsevier	NeuroImage: Clinical	2213-1582	ADHD severity is associated with white matter microstructure in the subgenual cingulum	1153.93	TRUE			FALSE	cc-by	epmc_xml	oa	TRUE	Wellcome Trust			079711/Z/06/Z
PMC4499112	26024738	10.1007/s00125-015-3627-3	Springer	Diabetologia	0012-186X, 1432-0428	Insulin regulates Rab3#Noc2 complex dissociation to promote GLUT4 translocation in rat adipocytes	1154.44	TRUE			FALSE	cc-by	epmc_xml	hybrid	TRUE	Wellcome Trust			077454/Z/05/Z
PMC4377944	25764057	10.3390/ijerph120302941	MDPI	International Journal of Environmental Research and Public Health	1661-7827, 1660-4601	Association of light exposure on physical activity and sedentary time in young people	1156.61	TRUE			FALSE	cc-by	epmc_xml	oa	TRUE	British Heart Foundation / Cancer Research UK	ESRC		BHF - RE/10/005/28296 and Cancer Research UK programme grant number C1418/A141	ES/M003795/1
PMC4513187	26236629	10.1016/j.nicl.2015.06.005	Elsevier	NeuroImage: Clinical	2213-1582	White matter tract signatures of impaired social cognition in frontotemporal lobar degeneration	1157.26	TRUE			FALSE	cc-by	epmc_xml	oa	TRUE	Wellcome Trust	MRC / ESRC		091673/Z/10/Z	ES/K006711/1
PMC4614541	25486354	10.4161/15384101.2014.950151	Taylor & Francis	Cell Cycle	1538-4101, 1551-4005	Why genes extending lifespan in model organisms...	1157.27	TRUE			FALSE	cc-by	epmc_xml	hybrid	TRUE	Wellcome Trust			WT094386MA
PMC4332198	25501439	10.14814/phy2.12194	Wiley	Physiological Reports	2051-817X	An Excel-based implementation of the spectral method of action potential alternans analysis	1158	TRUE			FALSE	cc-by	epmc_xml	oa	TRUE
PMC4275574	25463459	10.1016/j.neuroimage.2014.11.021	Elsevier	Neuroimage	1053-8119, 1095-9572	Sparse network-based models for patient classification using fMRI	1158.28	TRUE			FALSE	cc-by	epmc_xml	hybrid	TRUE	Wellcome Trust			Fellowship
PMC4174441	25171822	10.1261/rna.045849.114	Cold Spring Harbor Laboratory Press	RNA	1355-8382, 1469-9001	Drosophila Syncrip modulates the expression of mRNAs encoding key synaptic proteins required for morphology at the neuromuscular junction	1158.31	TRUE			FALSE	cc-by	epmc	hybrid	TRUE	Wellcome Trust				96144
PMC4433704	26065008	10.1155/2015/901679	Hindawi Publishing Corporation	Journal of Immunology Research	2314-8861, 2314-7156	Death Receptor 3 Increases Mineral Apposition by Osteoblasts and Region Specific New Bone Formation in the Axial Skeleton of Male DBA/1 Mice	1160.09	TRUE			FALSE	cc-by	epmc_xml	hybrid	TRUE			British Heart Foundation			FS/05/110/19954
PMC4513131	25969539	10.1074/jbc.M115.640524	ASBMB	The Journal of Biological Chemistry	0021-9258, 1083-351X	Characterization of Zinc Influx Transporters (ZIPs) in Pancreatic Beta Cells: Roles in Regulating Cytosolic Zinc Homeostasis and Insulin Secretion	1168.22	TRUE			FALSE	cc-by	epmc_xml	hybrid	TRUE	Wellcome Trust			091991/Z/10/Z
PMC4446369	26029629	10.1016/j.nicl.2015.02.019	Elsevier	NeuroImage: Clinical	2213-1582	Functional neuroanatomy of auditory scene analysis in Alzheimer's disease	1172.51	TRUE			FALSE	cc-by	epmc_xml	oa	TRUE	Wellcome Trust			091673/Z/10/Z
PMC4375635	25844331	10.1016/j.nicl.2015.03.004	Elsevier	NeuroImage: Clinical	2213-1582	T2 mapping outperforms normalised FLAIR in identifying hippocampal sclerosis	1172.51	TRUE			FALSE	cc-by	epmc_xml	oa	TRUE	Wellcome Trust
PMC4352972	25551772	10.4161/15384101.2014.988027	Taylor & Francis	Cell Cycle	1538-4101, 1551-4005	Cell competition: Winning out by losing Notch	1174.16	TRUE			FALSE	cc-by	epmc_xml	hybrid	TRUE	0	0	0	0	0	0
PMC4362764	25781015	10.1371/journal.pntd.0003608	PLOS	PLoS Neglected Tropical Diseases	1935-2727, 1935-2735	Prevalence and diversity of small mammal-associated Bartonella species in rural and urban Kenya	1175.2	TRUE			FALSE	cc0	epmc_xml	oa	TRUE	Wellcome Trust			081828/B/06/Z
PMC4505424	25995448	10.1074/jbc.M115.660613	American Society for Biochemistry and Molecular Biology	Journal of Biological Chemistry	0021-9258, 1083-351X	A novel mechanism for binding of galactose-terminated glycans by the C-type carbohydrate-recognition domain in blood dendritic cell antigen 2.	1179.63	TRUE			FALSE	cc-by	epmc_xml	hybrid	TRUE	WT			093599/Z/10/Z
PMC4505523	25903136	10.1074/jbc.M115.642033	American Society for Biochemistry and Molecular Biology (ASBMB)	Journal of Biological Chemistry	0021-9258, 1083-351X	Contribution of the juxta-transmembrane intracellular regions to the time-course and permeation of ATP-gated P2X7 receptor ion channels	1185.6	TRUE			FALSE	cc-by	epmc_xml	hybrid	TRUE	Wellcome Trust	MRC	0	Wellcome Trust 080487/z/06/z "Characterization of P2X1 receptor function, regulation and development of molecular models of drug action at ATP gated P2X receptors ".	MRC MR/K027018/1 "Integrated mutagenesis, bio-infomratic and fluorsecence approaches to characterize the molecular basis of antagonist action at P2X7 receptors for ATP".	0
PMC4340402	25425641	10.1074/jbc.M114.592246	American Society for Biochemistry and Molecular Biology (ASBMB)	Journal of Biological Chemistry	0021-9258, 1083-351X	Use of chimeras, point mutants and molecular modelling to map the antagonist binding site of NF449 at P2X1 receptors for ATP	1185.6	TRUE			FALSE	cc-by	epmc_xml	hybrid	TRUE	British Heart Foundation	0	0	BHF PhD studentship to Louise Farmer FS/09/059/27972	0	0
PMC4415021	25634958	10.1096/fj.14-267179	FASEB	FASEB Journal	0892-6638, 1530-6860	Chronic exposure to neonicotinoids increases neuronal vulnerability to mitochondrial dysfunction in the bumblebee (Bombus terrestris).	1186.35	TRUE			FALSE	cc-by	epmc_xml	hybrid	TRUE	Wellcome Trust				BB/1000313/1
PMC4510525	26198310	10.1038/srep12399	Nature Publishing Group	Scientific Reports (OA)	2045-2322	Blood pressure and mortality: using offspring blood pressure as an instrument for own blood pressure in the HUNT study	1188	TRUE			FALSE	cc-by	epmc_xml	oa	TRUE	Wellcome Trust	MRC		WT083431MF	MC_UU_12013/1
PMC4568464	26364564	10.1038/srep14005	Nature Publishing Group	Scientific Reports (OA)	2045-2322	Exploring causal associations of alcohol with cardiovascular and metabolic risk factors in a Chinese population using MR	1188	TRUE			FALSE	cc-by	epmc_xml	oa	TRUE	MRC	British Heart Foundation	Cancer Research UK	MC_UU_12013/1
PMC4585806	26395864	10.1038/srep14288	Nature Publishing Group	Scientific Reports (OA)	2045-2322	Reducing the stress of drug administration: implications for the 3Rs	1188	TRUE			FALSE	cc-by	epmc_xml	oa	TRUE	MRC	BBSRC	Wellcome Trust	MR/L011212/1	BB/L009137/1	WT084621/Z08/Z
PMC4457145	26046460	10.1038/srep11061	Nature Publishing Group	Scientific Reports	2045-2322	A minimally invasive, lentiviral based method for the rapid and sustained genetic manipulation of renal tubules	1188	TRUE			FALSE	cc-by	epmc_xml	oa	TRUE	0	0	0	0	0	0
PMC4397834	25873159	10.1038/srep09597	Nature Publishing Group	Scientific Reports	2045-2322	E. coli OxyS non-coding RNA does not trigger RNAi in C. elegans	1188	TRUE			FALSE	cc-by	epmc_xml	oa	TRUE	0	0	0	0	0	0
PMC4403519	25893952	10.1038/srep09385	Nature Publishing Group	Scientific Reports	2045-2322	Fast imaging of live organisms with sculpted light sheets	1188	TRUE			FALSE	cc-by	epmc_xml	oa	TRUE	0	0	0	0	0	0
PMC4518226	26220399	10.1038/srep12556	Nature Publishing Group	Scientific Reports	2045-2322	Hydroxyproline Ring Pucker Causes Frustration of Helix Parameters in the Collagen Triple Helix	1188	TRUE			FALSE	cc-by	epmc_xml	oa	TRUE	0	0	0	0	0	0
PMC4399386	25881075	10.1038/srep09644	Nature Publishing Group	Scientific Reports	2045-2322	A Conserved Signalling Pathway for Amoebozoan Encystation that was Co-Opted for Multicellular Development	1188	TRUE			FALSE	cc-by	epmc_xml	oa	TRUE	Wellcome Trust				100293/Z/12/Z
PMC4413877	25922883	10.1038/srep09811	Nature Publishing Group	Scientific Reports	2045-2322	Rapid generation of endogenously driven transcriptional reporters in cells through CRISPR/Cas9.	1188	TRUE			FALSE	cc-by	epmc_xml	oa	TRUE	Wellcome Trust				098391/Z/12/Z	097418/Z/11/Z
PMC4365405	0	10.1038/srep09329	Nature Publishing Group	Scientific Reports	2045-2322	Palladium-Mediated Dealkylation of N-Propargyl-Floxuridine as a Bioorthogonal Oxygen-Independent Prodrug Strategy	1188	TRUE			FALSE	cc-by	epmc_xml	oa	TRUE	Cancer Research UK	0	0	C10195/A16639
PMC4550848	26310125	10.1038/srep13426	Nature Publishing Group	Scientific Report	2045-2322	The RNA-binding protein Sam68 regulates expression and transcription function of the androgen receptor splice variant AR-V7	1188	TRUE			FALSE	cc-by	epmc_xml	oa	TRUE	Cancer Research UK			C19198/A15339
PMC4438486	25990418	10.1038/srep10442	Nature Publishing Group	Scientific Reports	2045-2322	A new GWAS and meta-analysis with 1000 genomes imputation identifies novel risk varianst for colorectal cancer	1188	TRUE			FALSE	cc-by	epmc_xml	oa	TRUE	Cancer Research UK			C1298/A8362
PMC4585760	26391888	10.1038/srep14315	Nature Publishing Group	Scientific Reports	2045-2322	Genome-wide homozygosity signature & risk of Hodgkin lymphoma	1188	TRUE			FALSE	cc-by	epmc_xml	oa	TRUE	Cancer Research UK		Wellcome Trust	C1298/A8362		85475
PMC4513545	26208354	10.1038/srep12473	Nature Publishing Group	Scientific Reports	2045-2322	Implementation of genome-wide complex trait analysis to quantify the heritability im multiple myeloma	1188	TRUE			FALSE	cc-by	epmc_xml	oa	TRUE	Cancer Research UK			C1298/A8362
PMC4563562	26349679	10.1038/srep13889	Nature Publishing Group	Scientific Reports	2045-2322	Quantifying the heritability of testicular germ cell tumour using both genomic & population-based approaches	1188	TRUE			FALSE	cc-by	epmc_xml	oa	TRUE	Cancer Research UK			0
PMC4558608	26333773	10.1038/srep13293	Nature Publishing Group	Scientific Reports	2045-2322	The Crystal Structure of Pneumolysin at 2.0 Ã… Resolution Reveals the Molecular Packing of the Pre-pore Complex	1188	TRUE			FALSE	cc-by	epmc_xml	oa	TRUE	Wellcome Trust	0	0	097828/z/11/z	0	0
PMC4450752	26030010	10.1038/srep10425	Nature Publishing Group	Scientific Reports	2045-2322	Automated Detection of Leakage in Fluorescein Angiography Images with Application to Malarial Retinopathy	1188	TRUE			FALSE	cc-by	epmc_xml	oa	TRUE	Wellcome Trust			092668/Z/10/Z
PMC4459173	26053690	10.1038/srep11154	Nature Publishing Group	Scientific Reports	2045-2322	Automated Detection of Vessel Abnormalities on Fluorescein Angiogram in Malarial Retinopathy	1188	TRUE			FALSE	cc-by	epmc_xml	oa	TRUE	Wellcome Trust			092668/Z/10/Z
PMC4559659	26337655	10.1038/srep13555	Scientific Reports	Nature Publishing Group	2045-2322	Chick tendon fibroblast transcriptome and shape depend on whether the cell has made its own collagen matrix	1188	TRUE			FALSE	cc-by	epmc_xml	oa	TRUE
PMC4490344	26139288	10.1038/srep11820	Nature Publishing Group	Scientific Reports	2045-2322	Comparative assessment of vaccine vectors encoding ten malaria antigens identifies two protective liver-stage candidates	1188	TRUE			FALSE	cc-by	epmc_xml	oa	TRUE	Wellcome Trust				104750/Z/14/Z
PMC4379466	25823571	10.1038/srep09583	Nature Publishing Group	Scientific Reports	2045-2322	Correlative in-resin super-resolution and electron microscopy using standard fluorescent proteins	1188	TRUE			FALSE	cc-by	epmc_xml	oa	TRUE	Wellcome Trust	Wellcome Trust			090532/Z/09/Z	91911
PMC4547133	26300212	10.1038/srep13449	Nature Publishing Group	Scientific Reports	2045-2322	Imaging real-time HIV-1 virion fusion with FRET-based biosensors	1188	TRUE			FALSE	cc-by	epmc_xml	oa	TRUE	Wellcome Trust				090532/Z/09/Z
PMC4451551	26033291	10.1038/srep10682	Nature Publishing Group	Scientific Reports	2045-2322	Primary macrophage chemotaxis induced by cannabinoid receptor 2 agonists occurs independently of the CB2 receptor	1188	TRUE			FALSE	cc-by	epmc_xml	oa	TRUE	British Heart Foundation				RG/10/15/28578; FS/12/69/30008
PMC4361843	25779975	10.1038/srep09198	Nature Publishing Group	Scientific Reports	2045-2322	The juxtamembrane regions of human receptor tyrosine kinases exhibit conserved interaction sites with anionic lipids	1188	TRUE			FALSE	cc-by	epmc_xml	oa	TRUE	Wellcome Trust				92970
PMC4459200	26053434	10.1038/srep11067	Nature Publishing Group	Scientific Reports	2045-2322	Biorealistic cardiac cell culture platforms with integrated monitoring of extracellular action potentials	1188	TRUE			FALSE	cc-by	epmc_xml	oa	TRUE		British Heart Foundation			0
PMC4601033	26456539	10.1038/srep15030	Nature Publishing Group	Scientific Reports	2045-2322	Mutual medication in capuchin monkeys - Social anointing improves coverage of topically applied anti-parasite medicines	1188	TRUE			FALSE	cc-by	epmc_xml	oa	TRUE	Wellcome Trust			WT094440MA
PMC4468576	26077929	10.1038/srep11385	Nature Publishing Group	Scientific Reports	2045-2322	A G-quadruplex-binding compound showing anti-tumour activity in an in vivo model for pancreatic cancer	1188	TRUE			FALSE	cc-by	epmc_xml	oa	TRUE	Wellcome Trust	MRC		C2259/A16569
PMC4423448	25950908	10.1038/srep10062	Nature Publishing Group	Scientific Reports	2045-2322	A novel and rapid method for obtaining high titre intact prion strains from mammalian brain	1188	TRUE			FALSE	cc-by	epmc_xml	oa	TRUE	Wellcome Trust	MRC
PMC4404714	25898175	10.1038/srep09941	Nature Publishing Group	Scientific Reports	2045-2322	Sulfonium Salts as Leaving Groups for Aromatic Labelling of Drug-like Small Molecules with Fluorine-18	1188	TRUE			FALSE	cc-by	epmc_xml	oa	TRUE	Wellcome Trust / Cancer Research UK	EPSRC		Wellcome Trust PhD Programme	Comprehensive Cancer Imaging Centre (C1519/A16463)
PMC4542335	26290392	10.1038/srep13113	Nature Publishing Group	Scientific Reports	2045-2322	Human cell dedifferentiation in mesenchymal condensates through controlled autophagy	1188	TRUE			FALSE	cc-by	epmc_xml	oa	TRUE	Arthritis Research UK	Arthritis Research UK	0	19429	20575	0
PMC4175410	25168161	10.1016/j.cognition.2014.07.010	Elsevier	Cognition	0010-0277, 1873-7838	Competition strength influences individual preferences in an auction game	1190.71	TRUE			FALSE	cc-by	publisher	hybrid	TRUE	Wellcome Trust			091593/Z/10/Z
PMC4505459	25925950	10.1074/jbc.M115.640367	ASBMB	Journal of Biological Chemistry	0021-9258, 1083-351X	Coronin-1C Protein and Caveolin Protein Provide Constitutive and Inducible Mechanisms of Rac1 Protein Trafficking	1192.06	TRUE			FALSE	cc-by	epmc_xml	hybrid	TRUE	Wellcome Trust			WT88419
PMC4358236	25605733	10.1074/jbc.M114.624650	American Society for Biochemistry and Molecular Biology	The Journal of Biological Chemistry	0021-9258, 1083-351X	Vaccinia Virus Protein A49 Is an Unexpected Member of the B-cell Lymphoma (Bcl)-2 Protein Family	1194.02	TRUE			FALSE	cc-by	epmc_xml	hybrid	TRUE	0	0	0	0	0	0
PMC4539390	26253567	10.1136/bmjopen-2015-008086	BMJ	BMJ Open	2044-6055	Comparison of single and combination diuretics on glucose tolerance (pathway-3) protocol for a randomised double-blind trial in patients with essential hypertension	1200	TRUE			FALSE	cc-by	epmc_xml	oa	TRUE	0	0	0	0	0	0
PMC4420941	25941180	10.1136/bmjopen-2014-007161	BMJ	BMJ Open	2044-6055	Local food environment interventions to improve healthy food choice in adults: a systematic review and realist synthesis protocol	1200	TRUE			FALSE	cc-by	epmc_xml	oa	TRUE	0	0	0	0	0	0
PMC4572485	25953777	10.1093/brain/awv107	Oxford University Press	Brain	0006-8950, 1460-2156	The role of tau in the pathological process and clinical expression of Huntingtonâ€™s disease	1200	TRUE			FALSE	cc-by	epmc_xml	hybrid	TRUE	0	0	0	0	0	0
PMC4411707	0	10.1530/EJE-14-0852	Bioscientifica	European Journal of Endocrinology	0804-4643, 1479-683X	Clinical Characteristics and Molecular Genetic Analysis of 22 patients with Neonatal Diabetes from the South-Eastern Region of Turkey: Predominance of non-KATP Channel Mutations	1200	TRUE			FALSE	cc-by	epmc_xml	hybrid	TRUE	Wellcome Trust	0	0	067463/Z/2/Z	0	0
PMC4593667	26333836	10.1098/rsob.150093	Royal society	Open Biology	2046-2441	Cell cycle progression is an essntial regulatory component of phospholipid metabolism & membrane hoemostasis	1200	TRUE			FALSE	cc-by	epmc_xml	oa	TRUE	Cancer Research UK			C37275/A20146
PMC4611208	26482774	10.1136/bmjopen-2015-008950	BMJ	BMJ Open	2044-6055	Interrupting transmission of a soil-transmitted helminths: a study protocol for cluster randomised trials evaluating alternative treatment strategies and delivery systems in Kenya.	1200	TRUE			FALSE	cc-by	epmc_xml	oa	TRUE	Wellcome Trust			WT092765
PMC4397614	25855670	10.1530/REP-14-0503	Bioscientifica	BioScientifica LtdReproduction	1470-1626, 1741-7899	Molecular analysis of the cumulus matrix: insights from mice with O-glycan-deficient oocytes	1200	TRUE			FALSE	cc-by	epmc_xml	hybrid	TRUE
PMC4191185	25161081	10.1530/JOE-14-0456	Bioscientifica	Journal of Endocrinology	0022-0795, 1479-6805	Serum cholesterol selectively regulates glucocorticoid sensitivity through activation of JNK	1200	TRUE			FALSE	cc-by	epmc_xml	hybrid	TRUE
PMC4424342	25802336	10.1074/jbc.M115.642983	American Society for Biochemistry and Molecular Biology (ASBMB)	Journal of Biological Chemistry	0021-9258, 1083-351X	Protein kinase A (PKA) phosphorylation of Shp2 inhibits its phosphatase activity and modulates ligand specificity	1202.6	TRUE			FALSE	cc-by	epmc_xml	hybrid	TRUE	Wellcome Trust			Sir Henry Dale fellowship
PMC4271597	25566122	10.3389/fpsyg.2014.01440	Frontiers	Frontiers in Psychology	1664-1078	Music training and empathy positively impact adults' sensitivity to infant distress	1208.89	TRUE			FALSE	cc-by	epmc_xml	oa	TRUE	Wellcome Trust				90139
PMC4444149	0	10.1002/iid3.49	Wiley	Immunity, Inflamation and Disease	2050-4527	Differences in immune responses between CMV-Seronegative and Seropositive patients with mycardial Ischaemia and reperfusion	1209.6	TRUE			FALSE	cc-by	epmc_xml	oa	TRUE	British Heart Foundation	0	0	FS/12/31/29533	0	0
PMC4260483	25538556	10.3389/fnins.2014.00405	Frontiers	Frontiers in Neurology	1662-4548, 1662-453X	A systematic framework for functional connectivity measures	1209.6	TRUE			FALSE	cc-by	epmc_xml	oa	TRUE	Wellcome Trust
PMC4226147	25426047	10.3389/fnhum.2014.00893	Frontiers	Frontiers in Human Neuroscience	1662-5161	The brainâ€™s response to pleasant touch: an EEG investigation of tactile caressing	1209.6	TRUE			FALSE	cc-by	epmc_xml	oa	TRUE	Wellcome Trust	EPSRC		087756/Z/08/Z	EP/H007083/1
PMC4416878	25713081	10.1074/jbc.M115.637306	ASBMB	The Journal of Biological Chemistry	0021-9258, 1083-351X	Golgi Anti-apoptotic Proteins Are Highly Conserved Ion Channels That Affect Apoptosis and Cell Migration	1213.26	TRUE			FALSE	cc-by	epmc_xml	hybrid	TRUE	0	0	0	0	0	0
PMC4620164	26493457	10.1136/bmjopen-2015-008577	BMJ	BMJ Open	2044-6055	Rapid diagnostic pathways for suspected colorectal cancer: views of primary and secondary care clinicians on challenges and their potential solutions	1215	TRUE			FALSE	cc-by	epmc_xml	oa	TRUE	Cancer Research UK			C41354/A13273
PMC4563249	26346873	10.1136/bmjopen-2015-007980	BMJ	BMJ Open	2044-6055	A Knee Monitoring Device and the Preferences of Patients Living with Osteoarthritis: A qualitative study	1215	TRUE			FALSE	cc-by	epmc_xml	oa	TRUE	WT			088844/Z/09/Z
PMC4679905	26631055	10.1136/bmjopen-2015-008737	BMJ	BMJ Open	2044-6055	Risk factors for hospital admission in the 28 days following a community-acquired pneumonia diagnosis in older adults, and their contribution to increasing hospitalisation rates over time.	1215	TRUE			FALSE	cc-by	epmc_xml	oa	TRUE	Wellcome Trust			WT098504/Z/12/Z
PMC4345525	25550454	10.1136/jech-2014-204621	BMJ	Journal of Epidemiology & Community Health	0143-005X, 1470-2738	Are estimates of socioeconomic inequalities in chronic disease artefactually narrowed by self-reported measures of prevalence in low-income and middle-income countries? Findings from the WHO-SAGE survey	1218.83	TRUE			FALSE	cc-by	epmc_xml	hybrid	TRUE	Wellcome Trust			WT084674/Z/08/Z
PMC4312353	25561321	10.1016/j.mehy.2014.12.007	Elsevier	Medical Hypotheses	0306-9877, 1532-2777	Optimal inference with suboptimal models: Addiction and active Bayesian inference	1228.56	TRUE			FALSE	cc-by	epmc_xml	hybrid	TRUE	Wellcome Trust			091593/Z/10/Z
PMC4589840	26543561	10.1016/j.nmni.2015.08.001	Elsevier	New Microbes and New Infections	2052-2975	Comparison of Binax NOW urine antigen test and pneumococcal DNA assay using qPCR, before and after nasopharyngeal swabbing in healthy Malawian children	1229.99	TRUE			FALSE	cc-by	epmc_xml	oa	TRUE	Wellcome Trust			WT 068026MA
PMC4289915	25445455	10.1016/j.bone.2014.10.015	Elsevier	Bone	8756-3282, 1873-2763	Individuals with high bone mass have an increased prevalence of radiographic knee osteoarthritis	1235.96	TRUE			FALSE	cc-by	epmc_xml	hybrid	TRUE	Arthritis Research UK			ARUK 19580
PMC4001185	0	10.1212/WNL.0000000000000312	American Academy of Neurology	Neurology	0028-3878, 1526-632X	Vascular risk factors, large artery atheroma and brain white matter hyperintensities	1239.29	TRUE			FALSE	cc-by	epmc_xml	hybrid	TRUE	Wellcome Trust	0	0	WT075611
PMC4170750	25108382	10.1016/j.virol.2014.07.015	Elsevier	Virology	0042-6822, 1096-0341	Novel flaviviruses from mosquitoes: Mosquito-specific evolutionary lineages within the phylogenetic group of mosquito-borne flaviviruses	1245.7	TRUE			FALSE	cc-by	publisher	hybrid	TRUE	0	0	0	0	0	0
PMC4624959	26188511	10.1016/j.bbrc.2015.07.073	Elsevier	Biochemical and Biophysical Research Communications	0006-291X, 1090-2104	SUMOylation of Argonaute-2 regulates RNA interference activity	1246.06	TRUE			FALSE	cc-by	epmc_xml	hybrid	TRUE	MRC	BBSRC	Wellcome Trust	MR/L003791	BB/K014358/1
PMC4334664	25585017	10.1016/j.neuroimage.2014.12.081	Elsevier	Neuroimage	1053-8119, 1095-9572	A DCM study of spectral asymmetries in feedforward and feedback connections between visual areas V1 and V4 in the monkey	1246.51	TRUE			FALSE	cc-by	epmc_xml	hybrid	TRUE	Wellcome Trust			088130/Z/09/Z
PMC4334663	25529007	10.1016/j.neuroimage.2014.12.030	Elsevier	Neuroimage	1053-8119, 1095-9572	Structure predicts function: Combining non-invasive electrophysiology with in-vivo histology	1247.18	TRUE			FALSE	cc-by	epmc_xml	hybrid	TRUE	Wellcome Trust	MRC			MR/K005464/1
PMC4367295	25648893	10.1074/jbc.M114.622738	American Society for Biochemistry and Molecular Biology	Journal of Biological Chemistry	0021-9258, 1083-351X	DNA Induces Conformational Changes in a Recombinant Human Minichromosome Maintenance Complex	1249.83	TRUE			FALSE	cc-by	epmc_xml	hybrid	TRUE	Cancer Research UK	Cancer Research UK	Wellcome Trust	A7771	A10945	092430/Z/10/Z
PMC4673530	25985846	10.3109/01677063.2015.1053478	Taylor & Francis	Journal of Neurogenetics	0167-7063, 1563-5260	Using human induced pluripotent stem cells (hiPSC) to model cerebellar disease: Hope and hype	1251.6	TRUE			FALSE	cc-by	epmc_xml	hybrid	TRUE	Wellcome Trust
PMC4249529	25224007	10.1128/AAC.03258-14	Cenveo Publisher Services	Antimicrobial Agents and Chemotherapy	0066-4804, 1098-6596	Effects of dosage, comorbidities, and food on isoniazid pharmacokinetics in Peruvian tuberculosis patients	1252.98	TRUE			FALSE	cc-by	epmc_xml	hybrid	TRUE	Wellcome Trust			WT078067/Z/05/Z
PMC4429367	25656299	10.1186/1476-072X-14-8	BioMed Central	International Journal of Health Geographics	1476-072X	Associations between BMI and home, school and route environmental exposures estimated using GPS and GIS: do we see evidence of selective daily mobility bias in children?	1253.4	TRUE			FALSE	cc-by	epmc_xml	oa	TRUE	0	0	0	0	0	0
PMC4385325	25853023	10.1186/s13550-015-0097-z	Springer	EJNMMI Research	2191-219X	Fluorescence-guided development of a tricistronic vector encoding bimodal optical and nuclear genetic reporters for in vivo cellular imaging	1254.6	TRUE			FALSE	cc-by	epmc_xml	oa	TRUE	Cancer Research UK	MRC / EPSRC			MR/K026739/1 and EP/L006472/1
PMC4547193	26329538	10.1186/1471-2105-16-S11-S9	BioMed Central	BMC Bioinformatics	1471-2105	Visual parameter optimisation for biomedical image processing	1256.4	TRUE			FALSE	cc-by	epmc_xml	oa	TRUE	WELMEC	0	0	WT 088908/Z/09/Z	0	0
PMC4331283	25629523	10.1016/j.vaccine.2015.01.042	Elsevier	Vaccine	0264-410X, 1873-2518	The relative magnitude of transgene-specific adaptive immune responses induced by human and chimpanzee adenovirus vectors differs between laboratory animals and a target species	1259.45	TRUE			FALSE	cc-by	epmc_xml	hybrid	TRUE	Wellcome Trust				104750/Z/14/Z
PMC4216463	25349449	10.1098/rstb.2013.0540	Royal Society Publishing	Philosophical Transactions of the Royal Society	0962-8436, 1471-2970	Mapping the route from naive pluripotency to lineage specification	1260	TRUE			FALSE	cc-by	epmc_xml	hybrid	TRUE	0	0	0	0	0	0
PMC4216464	25349450	10.1098/rstb.2013.0541	Royal Society Publishing	Philosophical Transactions of the Royal Society B	0962-8436, 1471-2970	The birth of embryonic pluripotency	1260	TRUE			FALSE	cc-by	epmc_xml	hybrid	TRUE	0	0	0	0	0	0
PMC4587319	25931509	10.1074/mcp.M114.047647	ASBMB	Molecular and Celluar Proeomics	1535-9476, 1535-9484	Architecture of a Host-Parasite Interface: Complex Targeting Mechanisms Revealed Through Proteomics	1260	TRUE			FALSE	cc-by	epmc_xml	hybrid	TRUE	Wellcome Trust				090007/Z/09/Z
PMC4587315	25963834	10.1074/mcp.M114.044289	ASBMB	Molecular and Celluar Proeomics	1535-9476, 1535-9484	Global Proteomics Analysis of the Response to Starvation in C. elegans.	1260	TRUE			FALSE	cc-by	epmc_xml	hybrid	TRUE	Wellcome Trust				83524	97945
PMC4275884	25487328	10.1098/rstb.2013.0376	Royal Society Publishing	Royal Society of London. Philosophical Transactions B. Biological Sciences	0962-8436, 1471-2970	A new era in palaeomicrobiology: prospects for ancient dental calculus as a long-term record of the human oral microbiome	1260	TRUE			FALSE	cc-by	epmc_xml	hybrid	TRUE	Wellcome Trust	0	0	097829/Z/11/A	0	0
PMC4265728	0	10.1016/j.ridd.2014.10.043	Elsevier	Research in Developmental Disabilities	0891-4222, 1873-3379	Preditors of participation of adolescents with cerebral palsy: a European multi-centre longitudinal study	1260.72	TRUE			FALSE	cc-by	publisher	hybrid	TRUE	Wellcome Trust	0	0	86315	0	0
PMC4376294	25658770	10.1016/j.addbeh.2015.01.026	Elsevier	Addictive Behaviors	0306-4603, 1873-6327	Does non-smoker identity following quitting predict long-term abstinence? Evidence from a population survey in England	1266.91	TRUE			FALSE	cc-by	epmc_xml	hybrid	TRUE	Cancer Research UK
PMC4364621	25677405	10.1016/j.jneumeth.2015.01.032	Elsevier	Journal of Neuroscience Methods	0165-0270, 1872-678X	Parametric estimation of cross-frequency coupling	1266.91	TRUE			FALSE	cc-by	epmc_xml	hybrid	TRUE	Wellcome Trust
PMC4317195	25282056	10.1016/j.cortex.2014.08.004	Elsevier	Cortex	0010-9452, 1973-8102	A dissociation between stopping and switching actions following a lesion of the pre-supplementary motor area	1268	TRUE			FALSE	cc-by	epmc_xml	hybrid	TRUE	Wellcome Trust				98282
PMC4300400	25447146	10.1016/j.biochi.2014.10.015	Elsevier	Biochimie	0300-9084, 1638-6183	Comparative biochemical analysis of three members of theSchistosoma mansoniÂ TAL family: Differences in ion and drug binding properties	1275.52	TRUE			FALSE	cc-by	epmc_xml	hybrid	TRUE	Wellcome Trust	Wellcome Trust		WT 083931/Z/07/Z	WT 094317/Z/10/Z
PMC4271336	0	10.1186/s13041-014-0088-4	BioMed Central	Molecular Brain	1756-6606	Human post-mortem synapse proteome integrity screening f or proteomic studies of postsynaptic complexes	1278.9	TRUE			FALSE	cc-by	epmc_xml	oa	TRUE	Wellcome Trust	0	0	WT077155
PMC4410793	25556811	10.1016/j.neuropsychologia.2014.12.025	Elsevier	Neuropsychologia	0028-3932, 1873-3514	The impact of different aetiologies on the cognitive performance of frontal patients	1279.06	TRUE			FALSE	cc-by	epmc_xml	hybrid	TRUE	Wellcome Trust			089231/A/09/Z
PMC4573990	26424969	10.1155/2015/791847	Hindawi Publishing Corporation	Mediators of Inflammation	0962-9351, 1466-1861	Trachoma and Ocular Chlamydial Infection in the Era of Genomics	1279.1	TRUE			FALSE	cc-by	epmc_xml	oa	TRUE	Wellcome Trust			WT079246/Z/06/Z
PMC4263529	25264230	10.1016/j.neuroimage.2014.09.044	Elsevier	Neuroimage	1053-8119, 1095-9572	Disentangling in vivo the effects of iron content and atrophy on the ageing human brain	1279.59	TRUE			FALSE	cc-by	publisher	hybrid	TRUE	Wellcome Trust			091593/Z/10/Z
PMC4346275	25583383	10.1016/j.jneumeth.2015.01.003	Elsevier	Journal of Neuroscience Methods	0165-0270, 1872-678X	Active inference and oculomotor pursuit: The dynamic causal modelling of eye movements	1279.97	TRUE			FALSE	cc-by	epmc_xml	hybrid	TRUE	Wellcome Trust			088130/Z/09/Z
PMC4344222	25451639	10.1016/j.freeradbiomed.2014.10.575	Elsevier	Free Radical Biology and Medicine	0891-5849, 1873-4596	Regulation of iNOS function and cellular redox state by macrophage Gch1 reveals specific requirements for tetrahydrobiopterin in NRF2 activation	1281.41	TRUE			FALSE	cc-by	epmc_xml	hybrid	TRUE	Wellcome Trust	Wellcome Trust			091504/Z/10/Z	090532/Z/09/Z
PMC4543653	26139601	10.1074/jbc.m115.639237	American Society for Biochemistry and Molecular Biology	Journal of Biological Chemistry	0021-9258, 1083-351X	Loss of LKB1 in pancreatic beta cells enhances glucose-stimulated insulin secretion despite profound mitochondrial defects	1281.64	TRUE			FALSE	cc-by	epmc_xml	hybrid	TRUE	WT			098424/Z/12/Z,
PMC4349632	25573670	10.1016/j.neuroimage.2014.12.071	Elsevier	Neuroimage	1053-8119, 1095-9572	Arbitration between controlled and impulsive choice	1282	TRUE			FALSE	cc-by	epmc_xml	hybrid	TRUE	Wellcome Trust			091593/Z/10/Z
PMC4373032	25889461	10.1186/s13071-015-0782-9	Biomed Central	Parasites and Vectors	1756-3305	A genetic analysis of Trichuris trichiura and Trichuris suis from Ecuador	1284	TRUE			FALSE	cc-by	epmc_xml	oa	TRUE	WT
PMC4276868	25336647	10.1074/jbc.M114.610782	American Society for Biochemistry and Molecular Biology	Journal of Biological Chemistry	0021-9258, 1083-351X	Inter-domain Communication of Human Cystathionine ?-Synthase: structural basis of S-adenosyl-L-methionine activation	1286.35	TRUE			FALSE	cc-by	epmc_xml	hybrid	TRUE	Wellcome Trust				092809/Z/10/Z
PMC4295935	25434736	10.1016/j.ypmed.2014.11.018	Elsevier	Preventive Medicine	0091-7435, 1096-0260	Mothers' perceived proximity to green space is associated with TV viewing time in children: the Growing Up in Scotland study	1287	TRUE			FALSE	cc-by	epmc_xml	hybrid	TRUE	British Heart Foundation	MRC / ESRC		RE/10/005/28296	ES/M003795/1
PMC4316651	0	10.1186/s13071-015-0656-1	BioMed Central	Parasites & Vectors	1756-3305	Extracellular Onchocerca-derived small RNAs in host nodules and blood	1289.1	TRUE			FALSE	cc-by	epmc_xml	oa	TRUE	Wellcome Trust	0	0	095831/Z/11/Z
PMC4197264	25303991	10.1186/s13071-014-0466-x	BioMed Central	Parasites & Vectors	1756-3305	The global distribution and transmission limits of lymphatic filariasis: past and present.	1289.1	TRUE			FALSE	cc-by	epmc_xml	oa	TRUE	Wellcome Trust			098045/Z/11/Z
PMC4270448	25315822	10.1016/j.jmb.2014.10.008	Elsevier	Journal of Molecular Biology	0022-2836, 1089-8638	GEN1 from a thermophilic fungus is functionally closely similar to non-eukaryotic junction-resolving enzymes.	1289.9	TRUE			FALSE	cc-by	publisher	hybrid	TRUE	Cancer Research UK				CRUK C28/4959
PMC4263873	25281741	10.1074/jbc.M114.590976	ASBMB	Journal of Biological Chemistry	0021-9258, 1083-351X	Identification of Small Molecule Inhibitors of Pre-mRNA Splicing	1290.32	TRUE			FALSE	cc-by	epmc_xml	hybrid	TRUE	Wellcome Trust				073980/Z/03/Z
PMC4584935	26442106	10.3389/fgene.2015.00288	Frontiers	Frontiers in Genetics - Cancer Genetics	1664-8021	Exome sequencing of a colorectal cancer family reveals shared mutation pattern and predisposition circuitry along tumor pathways	1291.04	TRUE			FALSE	cc-by	epmc_xml	oa	TRUE	Wellcome Trust			100715
PMC4424433	0	10.1098/rstb.2014.0083	Royal Society	Philosophical Transactions B	0962-8436, 1471-2970	Antimicrobial resistance in humans, livestock and the wider environment	1296	TRUE			FALSE	cc-by	epmc_xml	hybrid	TRUE	Wellcome Trust	0	0	095831/Z/11/Z
PMC4305403	0	10.1098/rsif.2014.0882	Royal Society	Journal of the Royal Society Interface	1742-5689, 1742-5662	Collective sensing and collective responses in quorum sensing bacteria	1296	TRUE			FALSE	cc-by	epmc_xml	hybrid	TRUE	Wellcome Trust	0	0	095831/Z/11/Z
PMC4298201	25520354	10.1098/rspb.2014.1720	Royal Society	Proceedings of the Royal Society B	0962-8452, 1471-2954	Ablation of insulin-producing cells prevents obesity but not premature mortality caused by a high-sugar diet in Drosophila	1296	TRUE			FALSE	cc-by	epmc_xml	hybrid	TRUE	Wellcome Trust			097815/Z/11/Z
PMC4305174	25602077	10.1098/rstb.2014.0074	Royal Society	Philosophical Transactions of the Royal Society B	0962-8436, 1471-2970	The role and interaction of imprinted genes in human fetal growth	1296	TRUE			FALSE	cc-by	epmc_xml	hybrid	TRUE	Wellcome Trust	MRC
PMC4526967	26123578	10.2196/mhealth.3895	Journal of Medical Internet Research	Journal of Medical Internet Research	2291-5222	Identification of behaviour change techniques and engagement strategies to design a smartphone app to reduce alcohol consumption using a formal consensus method	1296.55	TRUE			FALSE	cc-by	epmc_xml	oa	TRUE	Cancer Research UK
PMC4486676	26002719	10.1128/EC.00028-15	Cenveo Publisher	Eukaryotic Cell	1535-9778, 1535-9786	The Candida albicans Exocyst Subunit Sec6 Contributes to Cell Wall Integrity and Is a Determinant of Hyphal Branching	1297.94	TRUE			FALSE	cc-by	epmc_xml	hybrid	TRUE	Wellcome Trust	0	0	MB004 RGB4377 RG1101	0	0
PMC4073227	24840816	10.1016/j.bone.2014.05.008	Elsevier	Bone	8756-3282, 1873-2763	Birth weight is positively related to bone size in adolescents but inversely related to cortical bone mineral density: findings from a large prospective cohort study	1298.65	TRUE			FALSE	cc-by	epmc_xml	hybrid	TRUE	Wellcome Trust			WT079960
PMC4426358	25717150	10.1534/g3.115.017509	Genetics Society of America	G3: Genes, Genomes, Genetics	2160-1836	A novel electronic assessment strategy to support applied Drosophila genetics training on university courses	1299.14	TRUE			FALSE	cc-by	epmc_xml	oa	TRUE
PMC4537945	26071543	10.1152/ajpheart.00233.2015	American Physiological Society	American Journal of Physiology-Heart & Circulatory Physiology	0363-6135, 1522-1539	Optical projection tomography permits efficient assessment of infarct volume in the murine heart	1299.79	TRUE			FALSE	cc-by	epmc_xml	hybrid	TRUE	Wellcome Trust	0	0	WT091720
PMC4424335	25778404	10.1074/jbc.M114.628750	ASBMB	Journal of Biological Chemistry	0021-9258, 1083-351X	The Early Metazoan Trichoplax adhaerens Possesses a Functional O-GlcNAc System.	1300	TRUE			FALSE	cc-by	epmc_xml	hybrid	TRUE	Wellcome Trust				77705	83481
PMC4613321	26393574	10.3390/ijms160922509	MDPI	International Journal of Molecular Sciences	1422-0067	Mitochondrial Optic Atrophy (OPA) 1 Processing Is Altered in Response to Neonatal Hypoxic-Ischemic Brain Injury	1300	TRUE			FALSE	cc-by	epmc_xml	oa	TRUE	Wellcome Trust			WT094823
PMC4410792	25433223	10.1016/j.neuropsychologia.2014.11.032	Elsevier	Neuropsychologia	0028-3932, 1873-3514	Williams syndrome: a surprising deficit in oromotor praxis in a population with proficient language production	1300.84	TRUE			FALSE	cc-by	epmc_xml	hybrid	TRUE	Wellcome Trust			WT074414MA
PMC4246079	25313401	10.1074/jbc.M114.608448	American Society for Biochemistry and Molecular Biology, Inc.	Journal of Biological Chemistry	0021-9258, 1083-351X	Structure and mechanism of the bifunctional CinA enzyme from Thermus thermophilus	1306.68	TRUE			FALSE	cc-by	epmc_xml	hybrid	TRUE
PMC4289914	25094018	10.1016/j.neuroimage.2014.07.051	Elsevier	NeuroImage	1053-8119, 1095-9572	Group-PCA for very large fMRI datasets	1308.17	TRUE			FALSE	cc-by	epmc_xml	hybrid	TRUE	Wellcome Trust				98369
PMC4228191	25392710	10.1186/1743-7075-11-51		Nutrition & metabolism	1743-7075	Protein energy malnutrition increases arginase activity in monocytes and macrophages	1314.6	TRUE			FALSE	cc-by	epmc_xml	oa	TRUE	Wellcome Trust			089201/Z/09/Z
PMC4404196	25887289	10.1186/s12866-015-0410-z	Biomed Central	BMC Microbiology	1471-2180	An alternate route to phosphorylating DegU of Bacillus subtilis using acetyl phosphate.	1315.2	TRUE			FALSE	cc-by	epmc_xml	oa	TRUE	Wellcome Trust				093714/Z/10/Z
PMC4329658	25886303	10.1186/s12888-015-0398-9	BioMed Central	BMC Psychiatry	1471-244X	The effects of the Omagh bomb on adolescent mental health: a school-based study	1315.8	TRUE			FALSE	cc-by	epmc_xml	oa	TRUE	Wellcome Trust			06977
PMC4263850	25336650	10.1074/jbc.R114.609198	ASBMB	Journal of Biological Chemistry	0021-9258, 1083-351X	O-GlcNAcase: promiscuous hexosaminidase or key regulator of O-GlcNAc signaling?	1317.68	TRUE			FALSE	cc-by	epmc_xml	hybrid	TRUE	Wellcome Trust				087590/Z/08/Z
PMC4288001	25470184	10.1038/psp.2014.48		CPT: pharmacometrics & systems pharmacology	2163-8306	Systems pharmacology of the NGF signalling through p75 and TrkA receptors	1320	TRUE			FALSE	cc-by	epmc_xml	oa	TRUE	Wellcome Trust			WT/090433/B/09/Z
PMC4295256	25492581	10.1186/1471-2474-15-418	BioMed Central	BMC Musculoskeletal Disorders	1471-2474	Pain medication management of musculoskeletal conditions at first presentation in primary care: analysis of routinely collected medical record data	1325	TRUE			FALSE	cc-by	epmc_xml	oa	TRUE	ARUK			18139
PMC4261613	25477255	10.1186/s12875-014-0195-4	BioMed Central	BMC Family Practice	1471-2296	Repeated primary care consulations for non-specific physical symptoms in children in UK: a cohort study	1325	TRUE			FALSE	cc-by	epmc_xml	oa	TRUE	ARUK	Wellcome		19634	83572
PMC4490499	26110381	10.3390/ijms160613356	MDPI	International Journal of Molecular Sciences	1422-0067	Targeted siRNA screens identify ER-to-mitochondrial calcium exchange in autophagy and mitophagy responses in RPE1 cells	1333.32	TRUE			FALSE	cc-by	epmc_xml	oa	TRUE	Wellcome Trust	MRC		WT089625/Z/09/Z
PMC4609759	26311185	10.1152/jn.00574.2014	American Physiological Society	Journal of Neurophysiology	0022-3077, 1522-1598	Adenosine-mediated modulation of ventral horn interneurons and spinal motoneurons in neonatal mice	1336.75	TRUE			FALSE	cc-by	epmc_xml	hybrid	TRUE	Wellcome Trust			097831/z/11/z
PMC4582806	25496810	10.1016/j.neuropsychologia.2014.12.004	Elsevier	Neuropsychologia	0028-3932, 1873-3514	Dissociating the semantic function of two neighbouring subregions in the left lateral anterior temporal lobe	1338.62	TRUE			FALSE	cc-by	epmc_xml	hybrid	TRUE	Wellcome Trust			097720/Z/11/Z
PMC4312355	25446180	10.1016/j.yjmcc.2014.11.012	Elsevier	Journal of Molecular and Cellular Cardiology	0022-2828, 1095-8584	cAMP-induced actin cytoskeleton remodelling inhibits MKL1-dependent expression of the chemotactic and pro-proliferative factor, CCN1	1339.76	TRUE			FALSE	cc-by	epmc_xml	hybrid	TRUE	British Heart Foundation			PG/11/78/29113
PMC4504022	25861831	10.1016/j.radonc.2015.03.023	Elsevier	Radiotherapy and Oncology	0167-8140, 1879-0887	30 day mortality in adult palliative radiotherapy â€“ A retrospective population based study of 14,972 treatment episodes	1340.38	TRUE			FALSE	cc-by	epmc_xml	hybrid	TRUE	MRC	CRUK	0	MR/L01629X/1	C23434/A9805	C37059/A16369
PMC4609338	26504789	10.1155/2015/238757	Hindawi	BioMed Research International	2314-6133, 2314-6141	Genomic & histopathological tissue biomarkers that predict radiotherapy response in localised prostate cancer	1340.4	TRUE			FALSE	cc-by	epmc_xml	oa	TRUE	Cancer Research UK			0
PMC4524185	25939831	10.1128/JB.00199-15	ASBMB	Journal of Bacteriology	0021-9193, 1098-5530	Intraspecies Competition in Serratia marcescens Is Mediated by Type VI-Secreted Rhs Effectors and a Conserved Effector-Associated Accessory Protein.	1347.94	TRUE			FALSE	cc-by	epmc_xml	hybrid	TRUE	Wellcome Trust				104556/Z/14/Z
PMC4534766	25896391	10.1016/j.yjmcc.2015.04.011	Elsevier	Journal of Molecular and Cellular Cardiology	0022-2828, 1095-8584	Vascular biology of ageingâ€”implications in hypertension	1349.15	TRUE			FALSE	cc-by	epmc_xml	hybrid	TRUE	British Heart Foundation			RG/13/7/30099
PMC4206489	25337829	10.1371/journal.pone.0111275	PLOS	PLOS ONE	1932-6203	Rapid Recycling of Ca2+ Between IP3-Sensitive Stores and Lysosomes	1350	TRUE			FALSE	cc-by	epmc_xml	oa	TRUE	0	0	0	0	0	0
PMC4202322	25169982	10.1093/gbe/evu183	Oxford University Press	Genome Biology and Evolution	1759-6653	Conserved temporal patterns of microRNA expression in Drosophila support a developmental hourglass model	1350	TRUE			FALSE	cc-by	epmc_xml	oa	TRUE
PMC4202332	25364803	10.1093/gbe/evu196	Oxford University Press	Genome Biology and Evolution	1759-6653	Intron evolution in Saccharomycetaceae	1350	TRUE			FALSE	cc-by	epmc_xml	oa	TRUE
PMC4224341	25260585	10.1093/gbe/evu214	Oxford University Press	Genome Biology and Evolution	1759-6653	Extensive horizontal gene transfer during Staphylococcus aureus co-colonization in vivo	1350	TRUE			FALSE	cc-by	epmc_xml	oa	TRUE	WT
PMC4303260	25611204	10.1371/journal.pcbi.1004003	PLOS	PLOS Computational Biology	1553-734X, 1553-7358	A Probabilistic Palimpsest Model of Visual Short-term Memory	1350	TRUE			FALSE	cc-by	epmc_xml	oa	TRUE	Wellcome Trust
PMC4368544	25793302	10.1371/journal.pcbi.1004030	PLOS	PLOS Computational Biology	1553-734X, 1553-7358	Anticipation and Choice Heuristics in the Dynamic Consumption of Pain Relief	1350	TRUE			FALSE	cc-by	epmc_xml	oa	TRUE	Wellcome Trust			098362/Z/12/Z
PMC4607535	0	10.1093/gbe/evv179	Oxford University Press	Genome Biology and Evolution	1759-6653	Conserved cis-regulatory modules control robustness in Msx1 expression at single cell resolution	1350	TRUE			FALSE	cc-by	epmc_xml	oa	TRUE	Wellcome Trust	0	0	WT 066790/E/02/Z	066745/Z/01/Z	0
PMC4367890	25848938	10.1186/s12889-015-1609-5	BioMed Central	BMC Public Health	1471-2458	Socioeconomic indicators of health inequalities and female mortality: a nested cohort study within the United Kingdom Collaborative Trial of Ovarian Cancer Screening (UKCTOCS)	1350.51	TRUE			FALSE	cc-by	epmc_xml	oa	TRUE	Cancer Research UK	MRC
PMC4410797	25490434	10.1016/j.visres.2014.11.012	Elsevier	Vision Research	0042-6989, 1878-5646	fMRI evidence for areas that process surface gloss in the human visual cortex	1350.78	TRUE			FALSE	cc-by	epmc_xml	hybrid	TRUE	0	0	0	0	0	0
PMC4319684	25512302	10.1016/j.ydbio.2014.12.004	Elsevier	Developmental Biology	0012-1606, 1095-564X	Maternal-zygotic knockout reveals a critical role of Cdx2 in the morula to blastocyst transition	1350.78	TRUE			FALSE	cc-by	epmc_xml	hybrid	TRUE	0	0	0	0	0	0
PMC4506206	25730262	10.1021/jm501994d	American Chemical Society	Journal of Medicinal Chemistry	0022-2623, 1520-4804	10-Iodo-11H-indolo[3,2-c]quinoline-6-carboxylic Acids Are Selective Inhibitors of DYRK1A	1351.48	TRUE			FALSE	cc-by	epmc_xml	hybrid	TRUE	Wellcome Trust				092809/Z/10/Z
PMC4271363	25490956	10.1186/s12859-014-0396-9	Biomed Central	BMC Bioinformatics	1471-2105	Pathomx: an interactive workflow-based tool for the analysis of metabolomic data	1351.5	TRUE			FALSE	cc-by	epmc_xml	oa	TRUE	Wellcome Trust	0	0	14844	0	0
PMC4512038	26202794	10.1186/s12874-015-0041-y	BioMed Central	BMC Medical Research Methodology (OA)	1471-2288	A randomised controlled trial comparing opt-in and opt-out home visits for tracing lost participants in a prospective birth cohort study	1351.5	TRUE			FALSE	cc-by	epmc_xml	oa	TRUE	MRC	Wellcome Trust		WT102215/Z/13/Z
PMC4533938	26264041	10.1186/s12920-015-0112-2	BioMed Central	BMC Genomics	1755-8794	Association of SNPs in LCP1 and CTIF with altered hearing function in 11 year old children: Findings from the Avon Longitudinal Study of Parents and Children (ALSPAC) birth cohort and the G-EAR Consortium	1351.5	TRUE			FALSE	cc-by	epmc_xml	oa	TRUE	Wellcome Trust	MRC		WT102432/Z/13/Z
PMC4340639	25879810	10.1186/s12889-015-1501-3	BioMed Central	BMC Public Health	1471-2458	Increasing childrenâ€™s physical activity through a teaching-assistant led extracurricular intervention: process evaluation of the action 3:30 randomised feasibility trial	1351.5	TRUE			FALSE	cc-by	epmc_xml	oa	TRUE	MRC	Wellcome Trust	ESRC	MR/J000191/1
PMC4359571	25872500	10.1186/s13063-015-0610-8	BioMed Central	Trials	1745-6215	Physical ACtivity facilitation for Elders (PACE): study protocol for a randomised controlled trial	1351.5	TRUE			FALSE	cc-by	epmc_xml	oa	TRUE	ESRC	Wellcome Trust	MRC	RES-590-28-0005	WT087640M
PMC4520210	26224062	10.1186/s12889-015-2069-7	BioMed Central	BMC Public Health	1471-2458	Socioeconomic factors and other sources of variation in the prevalence of genital chlamydia infections: A systematic review and meta-analysis	1351.5	TRUE			FALSE	cc-by	epmc_xml	oa	TRUE	MRC			MR/KO232331/1
PMC4339015	25886385	10.1186/s12889-015-1360-y	BioMed Central	International Journal of Behavioral Nutrition and Physical Activity	1471-2458	The World Health Organizationâ€™s Health Promoting Schools framework: a Cochrane systematic review and meta-analysis	1351.5	TRUE			FALSE	cc-by	epmc_xml	oa	TRUE	ESRC	Wellcome Trust	MRC	MR/KO232331/1
PMC4548899	26303219	10.1186/s13075-015-0735-x	BioMed Central	Arthritis Research & Therapy	1478-6354, 1478-6362	A systematic review of the relationship between subchondral bone features, pain and structural pathology in peripheral joint osteoarthritis.	1351.5	TRUE			FALSE	cc-by	epmc_xml	oa	TRUE	Arthritis Research UK	0	0	20154	0	0
PMC4520081	26223536	10.1186/s13075-015-0692-4	BioMed Central	Arthritis Research & Therapy	1478-6354, 1478-6362	Association of HLA-DRB1 amino acid residues with giant cell arteritis: genetic association study, meta-analysis andgeo-epidemiological investigation	1351.5	TRUE			FALSE	cc-by	epmc_xml	oa	TRUE	Wellcome Trust	0	0	Starter Grant for Clinical Lecturers	0	0
PMC4351849	25872649	10.1186/s13063-015-0602-8	BioMed Central	Trials	1745-6215	Pain reduction with oral methotrexate in knee osteoarthritis, a pragmatic phase iii trial of treatment effectiveness (PROMOTE): study protocol for a randomized controlled trial	1351.5	TRUE			FALSE	cc-by	epmc_xml	oa	TRUE	Arthritis Research UK	0	0	Clinical Studies Grant 20186	0	0
PMC4422040	25928877	10.1186/s12881-015-0154-5	BioMed Central	BMC Medical Genetics	1471-2350	Variability of systemic and oro-dental phenotype in two families with non-lethal Raine syndrome withÂ FAM20Cmutations	1351.5	TRUE			FALSE	cc-by	epmc_xml	oa	TRUE	Wellcome Trust	0	0	WT082448	0	0
PMC4258283	0	10.1186/s13054-014-0606-x	Biomed Central	Critical Care	1364-8535, 1466-609X	Predictive models for Kidney Disease: Improving Global Outcomes (KDIGO) Defined Acute Kidney Injury (AKI).	1351.5	TRUE			FALSE	cc-by	epmc_xml	oa	TRUE	British Heart Foundation	0	0	This study was funded by a Flexibility and Sustainability Grant from University Hospitals Bristol NHS Foundation Trust, and BHF Grants CH/12/1/29419 & RG/13/6/29947.	0	0
PMC4407427	25873189	10.1186/s13063-015-0669-2	Biomed Central	Trials	1745-6215	Cardiac Rehabilitation versus Standard Care after Aortic Aneurysm Repair (Aneurysm CaRe): study protocol for a randomised controlled trial	1351.5	TRUE			FALSE	cc-by	epmc_xml	oa	TRUE	BHF			PG/13/98/30490
PMC4308925	25533381	10.1186/s13075-014-0509-x	BioMed Central	Arthritis Research and Therapy	1478-6354, 1478-6362	Antinociceptive effects of lacosamide on spinal neuronal and behavioural measures of pain in a rat model of osteoarthritis	1351.5	TRUE			FALSE	cc-by	epmc_xml	oa	TRUE	Arthritis Research UK			19444
PMC4334406	25886506	10.1186/s12889-015-1477-z	BioMed Central	BMC Public Health	1471-2458	Assessing care providers' perceptions and beliefs about physical activity in infants and toddlers: baseline findings from the Baby NAP SACC study	1351.5	TRUE			FALSE	cc-by	epmc_xml	oa	TRUE	British Heart Foundation / Wellcome Trust	ESRC		CEDAR grant number: RES-590-28-0002	ES/I901922/1
PMC4299571	25649323	10.1186/s12962-014-0028-2	BioMed Central	Cost Effectiveness and Resource Allocation	1478-7547	Cost-effectiveness and affordability of community mobilisation through women's groups and quality improvement in health facilities (MaiKhanda trial) in Malawi	1351.5	TRUE			FALSE	cc-by	epmc_xml	oa	TRUE	Wellcome Trust			085417MA/Z/08/Z
PMC4490705	26141209	10.1186/s12889-015-1976-y	BioMed Central	BMC Public Health	1471-2458	Diurnal patterns of objectively measured physical activity and sedentary behaviour in older men	1351.5	TRUE			FALSE	cc-by	epmc_xml	oa	TRUE	British Heart Foundation			PG09/024, PG/13/41/30304, RG/13/16/30528
PMC4587651	26416081	10.1186/s12884-015-0661-6	BioMed Central	BMC Pregnancy and Childbirth	1471-2393	Examining inequalities in uptake of maternal health care and choice of provider in underserved areas of Mumbai: a mixed methods study	1351.5	TRUE			FALSE	cc-by	epmc_xml	oa	TRUE	Wellcome Trust	ESRC		091561/Z/10/Z	ES/I033572/1
PMC4223846	25348492	10.1186/1471-2318-14-114	BioMed Central	BMC Genetics	1471-2318	How are falls and fear of falling associated with objectively measured physical activity in a cohort of community-dwelling older men?	1351.5	TRUE			FALSE	cc-by	epmc_xml	oa	TRUE	British Heart Foundation			RG/08/013/25942
PMC4354753	25890187	10.1186/s13075-015-0539-z	BioMed Central	Arthritis Research and Therapy	1478-6354, 1478-6362	IgG anti-apolipoprotein A1 antibodies in patients with systemic lupus erythematosus are associated with disease activity, therapy and mortality: an observational study	1351.5	TRUE			FALSE	cc-by	epmc_xml	oa	TRUE	Arthritis Research UK			19423
PMC4246452	25410740	10.1186/1471-2458-14-1187	BioMed Central	BMC Public Health	1471-2458	Inclusion of hazardous drinking does not improve the SCORE performance in men from Central and Eastern Europe: the findings from the HAPIEE cohorts	1351.5	TRUE			FALSE	cc-by	epmc_xml	oa	TRUE	Wellcome Trust			064947/Z/01/Z, 081081/Z/06/Z
PMC4216339	25339243	10.1186/1471-2458-14-1096	BioMed Central	BMC Public Health	1471-2458	Knowledge of cervical cancer and attendance at cervical cancer screening: A cross-sectional survey of black women in London	1351.5	TRUE			FALSE	cc-by	epmc_xml	oa	TRUE	Cancer Research UK
PMC4242476	25392075	10.1186/1471-2458-14-1163	BioMed Central	BMC Public Health	1471-2458	Prospective cohort study of the effectiveness of varenicline versus single form nicotine replacement therapy for smoking cessation in the "real world"	1351.5	TRUE			FALSE	cc-by	epmc_xml	oa	TRUE	Cancer Research UK
PMC4392477	25879697	10.1186/s13075-015-0545-1	BioMed Central	Arthritis Research and Therapy	1478-6354, 1478-6362	Takayasu arteritis in childhood: retrospective experience from a tertiary referral centre in the UK	1351.5	TRUE			FALSE	cc-by	epmc_xml	oa	TRUE	Arthritis Research UK			20164
PMC4510888	26217527	10.1186/s40608-015-0042-8	BioMed Central	BMC Obesity	2052-9538	Television viewing time and risk of incident obesity and central obesity: The English Longitudinal Study of Ageing	1351.5	TRUE			FALSE	cc-by	epmc_xml	oa	TRUE	British Heart Foundation / Cancer Research UK			RE/10/005/28296 for BHF and C1418/A141 for CRUK
PMC4265482	25487996	10.1186/1471-2407-14-926	BioMed Central	BMC Cancer	1471-2407	The impact of a cancer diagnosis on weight change: findings from prospective, population-based cohorts in the UK and the US	1351.5	TRUE			FALSE	cc-by	epmc_xml	oa	TRUE	Cancer Research UK
PMC4397889	25884168	10.1186/s12885-015-1167-3	BioMed Central	BMC Cancer	1471-2407	The impact of supplementary narrative-based information on colorectal cancer screening beliefs and intention	1351.5	TRUE			FALSE	cc-by	epmc_xml	oa	TRUE	Cancer Research UK			C9227/ 8933
PMC4209063	25312556	10.1186/1471-2458-14-1070	BioMed Central	BMC Public Health	1471-2458	The needs and preferences of pregnant smokers regarding tailored Internet-based Smoking Cessation Interventions: a qualitative interview study	1351.5	TRUE			FALSE	cc-by	epmc_xml	oa	TRUE	British Heart Foundation / Cancer Research UK	EPSRC / MRC
PMC4458007	26047810	10.1186/s12859-015-0622-0	BioMed Central	BMC Bioinformatics	1471-2105	Using Gene Ontology to describe the role of the neurexin-neuroligin-SHANK complex in human, mouse and rat and its relevance to autism	1351.5	TRUE			FALSE	cc-by	epmc_xml	oa	TRUE	British Heart Foundation			RG/13/5/30112 and SP/07/007/23671
PMC4265460	25432628	10.1186/1471-2407-14-891	BioMed Central	BMC Cancer	1471-2407	Boosting Wnt activity during colorectal cancer progression through selective hypermethylation of Wnt signaling antagonists	1351.51	TRUE			FALSE	cc-by	epmc_xml	oa	TRUE	0	0	0	0	0	0
PMC4564290	26159617	10.1016/j.yjmcc.2015.06.021	Elsevier	Journal of Molecular and Cellular Cardiology	0022-2828, 1095-8584	Molecular basis of hERG potassium channel blockade by the class Ic antiarrhythmic flecainide.	1357.12	TRUE			FALSE	cc-by	epmc_xml	hybrid	TRUE	British Heart Foundation			FS/11/59/28938	PG/10/96/28661	PG/12/69/29784
PMC4652609	26142929	10.1016/j.bone.2015.06.026	Elsevier	Bone	8756-3282, 1873-2763	Exercise does not enhance aged boneâ€™s impaired response to artificial loading in C57Bl/6 mice	1357.13	TRUE			FALSE	cc-by	epmc_xml	hybrid	TRUE	Wellcome Trust			WT092045/Z/10/Z
PMC4564289	26196304	10.1016/j.yjmcc.2015.07.009	Elsevier	Journal of Molecular and Cellular Cardiology	0022-2828, 1095-8584	Multiple quantum filtered 23Na NMR in the Langendorff perfused mouse heart: Ratio of Triple / Double quantum filtered signals correlate with [Na]i	1360.08	TRUE			FALSE	cc-by	epmc_xml	hybrid	TRUE	British Heart Foundation			RE/08/003	RG/12/4/29426		(Also Wellcome Trust / MRC Parkinson’s Consortium Grant)
PMC4381491	25889256	10.1186/s13071-015-0779-4	BioMed Central	Parasites & Vectors	1756-3305	The potential impact of moxidectin on onchocerciasis elimination in Africa: an economic evaluation based on the Phase II clinical trial data	1360.5	TRUE			FALSE	cc-by	epmc_xml	oa	TRUE	WT			085133/Z/08/Z; 092677/Z/10/Z
PMC4545898	26501679	10.1109/TNS.2015.2434851	IEEE Nuclear and Plasma Sciences Society	IEEE Transactions on Nuclear Science	2197-7364	RESCUE - Reduction of MRI SNR degradation by using an MR-synchronous low-interference PET acquisition technique	1361.91	TRUE			FALSE	cc-by	epmc_xml	oa	TRUE	Wellcome Trust			088641/Z/09/Z
PMC4306523	25512040	10.1016/j.neuroimage.2014.12.018	Elsevier	Neuroimage	1053-8119, 1095-9572	Brain activity dynamics in human parietal regions during spontaneous switches in bistable perception	1363.4	TRUE			FALSE	cc-by	epmc_xml	hybrid	TRUE	Wellcome Trust			#100227
PMC4306525	25512038	10.1016/j.neuroimage.2014.12.015	Elsevier	Neuroimage	1053-8119, 1095-9572	Precision and neuronal dynamics in the human posterior parietal cortex during evidence accumulation	1363.4	TRUE			FALSE	cc-by	epmc_xml	hybrid	TRUE	Wellcome Trust			098362/Z/12/Z
PMC4564288	26103619	10.1016/j.yjmcc.2015.06.012	Elsevier	Journal of Molecular and Cellular Cardiology	0022-2828, 1095-8584	Altered distribution of ICa impairs Ca release at the t-tubules of ventricular myocytes from failing hearts	1365.2	TRUE			FALSE	cc-by	epmc_xml	hybrid	TRUE	British Heart Foundation			PG/10/91/28644	RG/12/10/29802
PMC4373264	25859178	10.3389/fnins.2015.00097	Frontiers	Frontiers in Neurology	1662-4548, 1662-453X	An evaluation of Prospective Motion Correction (PMC) for high resolution quantitative MRI	1368	TRUE			FALSE	cc-by	epmc_xml	oa	TRUE	Wellcome Trust			091593/Z/10/Z
PMC4335485	25750620	10.3389/fnhum.2015.00096	Frontiers	Frontiers in Human Neuroscience	1662-5161	Comparing different stimulus configurations for population receptive field mapping in human fMRI	1368	TRUE			FALSE	cc-by	epmc_xml	oa	TRUE	Wellcome Trust			082334, 091593/Z/10/Z
PMC4373266	25859194	10.3389/fnbeh.2015.00073	Frontiers	Frontiers in Behavioral Neuroscience	1662-5153	Dementias show differential physiological responses to salient sounds	1368	TRUE			FALSE	cc-by	epmc_xml	oa	TRUE	Wellcome Trust	MRC		091673/Z/10/Z
PMC4539524	26347614	10.3389/fncir.2015.00039	Frontiers	Frontiers in Neural Circuits	1662-5110	Development of social behaviour in young zebrafish	1368	TRUE			FALSE	cc-by	epmc_xml	oa	TRUE	Wellcome Trust
PMC4285740	25620906	10.3389/fnins.2014.00427	Frontiers	Frontiers in Neurology	1662-4548, 1662-453X	High-resolution diffusion kurtosis imaging at 3T enabled by advanced post-processing	1368	TRUE			FALSE	cc-by	epmc_xml	oa	TRUE	Wellcome Trust			091593/Z/10/Z
PMC4559656	26388755	10.3389/fnhum.2015.00473	Frontiers	Frontiers in Human Neuroscience	1662-5161	How beliefs about self-creation inflate value in the human brain	1368	TRUE			FALSE	cc-by	epmc_xml	oa	TRUE	Wellcome Trust			Fellowship, 098362/Z/12/Z, WTCN
PMC4391262	25914637	10.3389/fnhum.2015.00191	Frontiers	Frontiers in Human Neuroscience	1662-5161	Imaging the passionate stage of romantic love by dopamine dynamics	1368	TRUE			FALSE	cc-by	epmc_xml	oa	TRUE	Wellcome Trust
PMC4550179	26379508	10.3389/fncir.2015.00037	Frontiers	Frontiers in Neural Circuits	1662-5110	Periodotopy in the gerbil inferior colliculus: local clustering rather than a gradient map	1368	TRUE			FALSE	cc-by	epmc_xml	oa	TRUE	Wellcome Trust	BBSRC		WT086697MA	BB/H008608/1 (not UCL)
PMC4420931	25999842	10.3389/fnhum.2015.00254	Frontiers	Frontiers in Human Neuroscience	1662-5161	Relationship between structural brainstem and brain plasticity and lower-limb training: a longitudinal pilot study	1368	TRUE			FALSE	cc-by	epmc_xml	oa	TRUE	Wellcome Trust
PMC4391030	25914641	10.3389/fneng.2015.00004	Frontiers	Frontiers in Neuroengineering	1662-6443	SET: A Pupil Detection Method Using Sinusoidal Approximation	1368	TRUE			FALSE	cc-by	epmc_xml	oa	TRUE	Wellcome Trust			094850/Z/10/Z
PMC4317190	25529292	10.1016/j.vaccine.2014.12.015	Elsevier	Vaccine	0264-410X, 1873-2518	Factors associated with tuberculosis infection, and with anti-mycobacterial immune responses, among five year olds BCG-immunised at birth in Entebbe, Uganda.	1368.26	TRUE			FALSE	cc-by	epmc_xml	hybrid	TRUE	Wellcome Trust			WT079110
PMC4503819	25939286	10.1016/j.ijlp.2015.04.004	Elsevier	International Journal of Law and Psychiatry	0160-2527, 1873-6386	Fluctuating capacity and advance decision-making in Bipolar Affective Disorder â€“ self-binding directives and self-determination	1370.17	TRUE			FALSE	cc-by	epmc_xml	hybrid	TRUE	Wellcome Trust			097683/Z/11/Z
PMC4508345	26099538	10.1016/j.bmcl.2015.06.001	Elsevier	Bioorganic & Medicinal Chemistry Letters	0960-894X, 1464-3405	Docking of competitive inhibitors to the P2X7 receptor family reveals key differences responsible for changes in response between rat and human	1370.43	TRUE			FALSE	cc-by	epmc_xml	hybrid	TRUE	Wellcome Trust	0	0	WT/099758/Z/12/Z	0	0
PMC4349634	0	10.1016/j.neuroimage.2014.12.057	Elsevier	NeuroImage	1053-8119, 1095-9572	Correlates of a single cortical action potential in the epidural EEG	1370.63	TRUE			FALSE	cc-by	epmc_xml	hybrid	TRUE	Wellcome Trust	0	0	101002/Z/13/Z	0	0
PMC4582770	26275478	10.1016/j.vaccine.2015.07.103	Elsevier	Vaccine	0264-410X, 1873-2518	Management and outcome of Bacille Calmette-GuÃ©rin vaccine adverse reactions	1370.73	TRUE			FALSE	cc-by	epmc_xml	hybrid	TRUE	Wellcome Trust			093768/Z/10/Z
PMC4552171	26200251	10.1016/j.neulet.2015.07.019	Elsevier	Neuroscience Letters	0304-3940, 1872-7972	ERK signaling mediates CaSR-promoted axon growth	1371.02	TRUE			FALSE	cc-by	epmc_xml	hybrid	TRUE	Wellcome Trust			85368
PMC4294420	25482365	10.1016/j.addbeh.2014.11.010	Elsevier	Addictive Behaviors	0306-4603, 1873-6327	Normative misperceptions about alcohol use in the general population of drinkers: a cross-sectional survey	1371.04	TRUE			FALSE	cc-by	epmc_xml	hybrid	TRUE	Cancer Research UK / British Heart Foundation	MRC / ESRC
PMC4312356	25463272	10.1016/j.yjmcc.2014.11.017	Academic Press	Journal of Molecular and Cellular Cardiology	0022-2828, 1095-8584	Perturbed atrial calcium handling in an ovine model of heart failure: potential roles for reductions in the L-type calcium current.	1371.2	TRUE			FALSE	cc-by	epmc_xml	hybrid	TRUE
PMC4503818	25997381	10.1016/j.ijlp.2015.04.002	Elsevier	International Journal of Law and Psychiatry	0160-2527, 1873-6386	Against a singular understanding of legal capacity: criminal responsibility and the Convention on the Rights of Persons with Disabilities	1371.36	TRUE			FALSE	cc-by	epmc_xml	hybrid	TRUE	Wellcome Trust			94910
PMC4451459	25861761	10.1016/j.jmb.2015.03.020	Elsevier	Journal of Molecular Biology	0022-2836, 1089-8638	The Response of Greek Key Proteins to Changes in Connectivity Depends on the Nature of Their Secondary Structure	1371.91	TRUE			FALSE	cc-by	epmc_xml	hybrid	TRUE	0	0	0	0	0	0
PMC4564291	26116865	10.1016/j.yjmcc.2015.06.016	Elsevier	Journal of Molecular and Cellular Cardiology	0022-2828, 1095-8584	Decreased creatine kinase is linked to diastolic dysfunction in rats with right heart failure induced by pulmonary artery hypertension	1373.68	TRUE			FALSE	cc-by	epmc_xml	hybrid	TRUE	British Heart Foundation	0	0	PG/13/3/29924	0	0
PMC4300414	25475730	10.1016/j.bbrc.2014.11.095.	Elsevier	Biochemical and Biophysical Research Communications	0006-291X, 1090-2104	Expression of a long variant of CRACR2A that belongs to the Rab GTPase protein family in endothelial cells	1373.71	TRUE			FALSE	cc-by	epmc_xml	hybrid	TRUE	Wellcome Trust	0	0	WT 083857	0	0
PMC4644990	26188331	10.1016/j.actatropica.2015.05.007	Elsevier	Acta Tropica	0001-706X, 1873-6254	Evidence and importance of genetic exchange among field populations of Trypanosoma cruzi.	1376.45	TRUE			FALSE	cc-by	epmc_xml	hybrid	TRUE	Wellcome Trust			WT066806MA
PMC4411217	25796989	10.1016/j.jviromet.2015.03.009	Elsevier	Journal of Virological Methods	0166-0934, 1879-0984	A novel method for the measurement of hepatitis C virus infectious titres using the IncuCyte ZOOM and its application to antiviral screening	1376.84	TRUE			FALSE	cc-by	epmc_xml	hybrid	TRUE	Wellcome Trust	0	0	WT096670	WT099759	WT093786
PMC4550720	26307613	10.1136/bmjopen-2014-007433	BMJ	BMJ Open	2044-6055	Digit Ratio and Autism Spectrum Disorders in the Avon Longitudinal Study of Parents and Children: A Birth Cohort Study	1377	TRUE			FALSE	cc-by	epmc_xml	oa	TRUE	Wellcome Trust			WT102215/2/13/2
PMC4538266	26264275	10.1136/bmjopen-2015-008808	BMJ	BMJ Open	2044-6055	Heavier smoking may lead to relative increase in waist circumference: evidence for causal relationship from Mendelian Randomisation meta-analysis. The CARTA consortium	1377	TRUE			FALSE	cc-by	epmc_xml	oa	TRUE	MRC	Wellcome Trust		MR/J01351X/1
PMC4390717	25838506	10.1136/bmjopen-2014-006965	BMJ	BMJ Open	2044-6055	Risk factors for emergency presentation with lung and colorectal cancers: a systematic review	1377	TRUE			FALSE	cc-by	epmc_xml	oa	TRUE	Cancer Research UK	0	0	CRUK Early Diagnosis Team	0	0
PMC4513439	26195471	10.1136/bmjopen-2015-008811	BMJ	BMJ Open	2044-6055	Determining Surgical Complications in the Overweight (DISCOVER): A Multicentre Observational Cohort Study to Evaluate the Role of Obesity as a Risk Factor for Post-operative Complications in General Surgery	1377	TRUE			FALSE	cc-by	epmc_xml	oa	TRUE	Wellcome Trust
PMC4577934	26391630	10.1136/bmjopen-2015-008050	BMJ	BMJ Open	2044-6055	Effectiveness of Peer Educators on the uptake of mobile x-ray tuberculosis screening at homeless hostels: a cluster randomised controlled trial	1377	TRUE			FALSE	cc-by	epmc_xml	oa	TRUE	Wellcome Trust
PMC4322204	25652803	10.1136/bmjopen-2014-007002	BMJ	BMJ Open	2044-6055	Over-reassurance and under-support after a â€˜false alarmâ€™: a systematic review of the impact on subsequent cancer symptom attribution and help-seeking	1377	TRUE			FALSE	cc-by	epmc_xml	oa	TRUE	Cancer Research UK			C48748/A16867
PMC4360842	25743153	10.1136/bmjopen-2015-007834	BMJ	BMJ Open	2044-6055	Patterns and trends in sources of information about sex among young people in Britain: evidence from three National Surveys of Sexual Attitudes and Lifestyles	1377	TRUE			FALSE	cc-by	epmc_xml	oa	TRUE	Wellcome Trust	MRC		84840	G0701757
PMC4283435	25550293	10.1136/bmjopen-2014-005982	BMJ	BMJ Open	2044-6055	Prevalence and determinants of caesarean section in private and public health facilities in underserved South Asian communities: cross-sectional analysis of data from Bangladesh, India, and Nepal	1377	TRUE			FALSE	cc-by	epmc_xml	oa	TRUE	Wellcome Trust			085417MA/Z/08/Z; 091561/Z/10/Z
PMC4538257	26253568	10.1136/bmjopen-2015-008951	BMJ	BMJ Open	2044-6055	Prevention and treatment of hypertension with algorithm based therapy (PATHWAY) number 2 protocol for a randomized crossover trial to determine optimal treatment for drug resistant hypertension	1377	TRUE			FALSE	cc-by	epmc_xml	oa	TRUE	British Heart Foundation
PMC4420935	25922098	10.1136/bmjopen-2014-006853	BMJ	BMJ Open	2044-6055	Recall of physical activity advice was associated with higher levels of physical activity in colorectal cancer patients	1377	TRUE			FALSE	cc-by	epmc_xml	oa	TRUE	Cancer Research UK
PMC4267077	25500618	10.1136/bmjopen-2014-006391	BMJ	BMJ Open	2044-6055	Socio-economic inequalities in dental caries and their determinants in adolescents in New Delhi, India	1377	TRUE			FALSE	cc-by	epmc_xml	oa	TRUE	Wellcome Trust
PMC4461009	25956603	10.1016/j.mad.2015.05.001	Elsevier	Mechanisms of Ageing and Development	0047-6374, 1872-6216	Progressive age-associated activation of JNK associates with conduction disruption in the aged atrium.	1378.25	TRUE			FALSE	cc-by	epmc_xml	hybrid	TRUE	British Heart Foundation	0	0	PG/11/15/28775	0	0
PMC4550477	26026581	10.1016/j.jneumeth.2015.05.016	Elsevier	Journal of Neuroscience Methods	0165-0270, 1872-678X	Near-field electromagnetic holography for high-resolution analysis of network interactions in neuronal tissue	1381.03	TRUE			FALSE	cc-by	epmc_xml	hybrid	TRUE	Wellcome Trust	0	0	098352/Z/12/Z	0	0
PMC4375474	25653282	10.1074/jbc.M114.625137	ASBMB	Journal of Biological Chemistry	0021-9258, 1083-351X	Proteasomal Modulation of Cellular SNAT2 (SLC38A2) Abundance and Function by Unsaturated Fatty Acid Availability	1382.92	TRUE			FALSE	cc-by	epmc_xml	hybrid	TRUE	Wellcome Trust				094226/Z/10/Z
PMC4429971	25770671	10.1016/j.jbtep.2015.02.007	Elsevier	Journal of Behavior Therapy and Experimental Psychiatry	0005-7916, 1873-7943	Thinking Well: A randomised controlled feasibility study of a new CBT therapy targeting reasoning biases in people with distressing persecutory delusional beliefs	1384.37	TRUE			FALSE	cc-by	epmc_xml	hybrid	TRUE	Wellcome Trust			085396/Z/08/Z
PMC4411215	25697597	10.1016/j.neulet.2015.01.084	Elsevier	Neuroscience Letters	0304-3940, 1872-7972	The Fabry disease-associated lipid Lyso-Gb3 enhances voltage-gated calcium currents in sensory neurons and causes pain	1385.58	TRUE			FALSE	cc-by	epmc_xml	hybrid	TRUE	Wellcome Trust	MRC
PMC4654430	26244281	10.1016/j.expneurol.2015.07.024.	Elsevier	Experimental Neurology	0014-4886, 1090-2430	Increasing levels of the endocannabinoid 2-AG is neuroprotective in the 1-methyl-4-phenyl-1,2,3,6-tetrahydropyridine mouse model of Parkinson's disease	1387.4	TRUE			FALSE	cc-by	epmc_xml	hybrid	TRUE	Wellcome Trust	0	0	WT080782MF	0	0
PMC4250079	25156127	10.1038/mt.2014.157	Nature Publishing Group	Molecular Therapy	1525-0016, 1525-0024	Combining viral vectored and protein-in-adjuvant vaccines against the blood-stage malaria antigen AMA1: report on a phase 1a clinical trial	1388.36	TRUE			FALSE	cc-by	epmc_xml	hybrid	TRUE	Wellcome Trust				90794
PMC4577729	26296477	10.1016/j.bmcl.2015.08.003	Elsevier	Bioorganic & Medicinal Chemistry Letters	0960-894X, 1464-3405	7-(pyrazol-4-yl)-3H-imidazo[4,5-b]pyridine-based derivatives for kinase inhibition	1388.5	TRUE			FALSE	cc-by	epmc_xml	hybrid	TRUE	Cancer Research UK			C309/A8274
PMC4533226	26043167	10.1016/j.adolescence.2015.05.003	Elsevier	Journal of Adolescence	0140-1971, 1095-9254	The audience effect in adolescence depends on who's looking over your shoulder	1388.89	TRUE			FALSE	cc-by	epmc_xml	hybrid	TRUE	Wellcome Trust			092860/Z/10/Z
PMC4542524	26102190	10.1016/j.neuropsychologia.2015.06.011	Elsevier	Neuropsychologia	0028-3932, 1873-3514	The effect of age on cognitive performance of frontal patients	1388.89	TRUE			FALSE	cc-by	epmc_xml	hybrid	TRUE	Wellcome Trust			089231/A/09/Z
PMC4509708	25962333	10.1016/j.jneumeth.2015.05.001	Elsevier	Journal of Neuroscience Methods	0165-0270, 1872-678X	Low cost production of 3D-printed devices and electrostimulation chambers for the culture of primary neurons	1390.57	TRUE			FALSE	cc-by	epmc_xml	hybrid	TRUE	Wellcome Trust			096564/Z/11/Z
PMC4503799	25959747	10.1016/j.vaccine.2015.04.087	Elsevier	Vaccine	0264-410X, 1873-2518	The effect of BCG on iron metabolism in the early neonatal period: a controlled trial in Gambian neonates.	1391.87	TRUE			FALSE	cc-by	epmc_xml	hybrid	TRUE	Wellcome Trust			WT102915/Z/13/Z
PMC4414354	25813344	10.1016/j.jmb.2015.03.010	Elsevier	Journal of Molecular Biology	0022-2836, 1089-8638	The Pentameric Nucleoplasmin Fold Is Present in Drosophila FKBP39 and a Large Number of Chromatin-Related Proteins	1392.07	TRUE			FALSE	cc-by	epmc_xml	hybrid	TRUE	0	0	0	0	0	0
PMC4509711	0	10.1016/j.molbiopara.2015.01.006	Elsevier	Molecular and Biochemical Parasitology	0166-6851, 1872-9428	25 years of Africantrypanosome research: form description, to molecular dissection and new drug discovery	1393.87	TRUE			FALSE	cc-by	epmc_xml	hybrid	TRUE	Wellcome Trust	0	0	095831/Z/11/Z
PMC4508348	26071201	10.1016/j.cellsig.2015.05.017	Elsevier	Cellular Signalling	0898-6568, 1873-3913	p70S6K is regulated by Focal Adhesion Kinase and is required for Src-selective autophagy	1394.14	TRUE			FALSE	cc-by	epmc_xml	hybrid	TRUE	Cancer Research UK	0	0	C157/A15703
PMC4295921	25463471	10.1016/j.neuroimage.2014.11.027	Elsevier	Neuroimage	1053-8119, 1095-9572	Construct Validation of a DCM for resting state fMRI	1396.42	TRUE			FALSE	cc-by	epmc_xml	hybrid	TRUE	Wellcome Trust			088130/Z/09/Z
PMC4415907	25700742	10.1016/j.neuropsychologia.2015.02.017	Elsevier	Neuropsychologia	0028-3932, 1873-3514	The role of the amygdala during emotional processing in Huntington's disease: From pre-manifest to late stage disease	1397.05	TRUE			FALSE	cc-by	epmc_xml	hybrid	TRUE	0	0	0	0	0	0
PMC4417270	25925961	10.1186/s12863-015-0200-5	Biomed Central	BMC Genetics	1471-2156	Immunolabelling shows histone H3 isoforms mono- or tri-methylated at lysine 4 have the same banded distribution across metaphase chromosomes from primary human lymphocytes and lymphoblastoid cell lines	1397.4	TRUE			FALSE	cc-by	epmc_xml	oa	TRUE	Cancer Research UK	0	0	RCPV16258(DJAA)	0	0
PMC4339476	25884986	10.1186/s12889-015-1464-4	BioMed Central	BMC Public Health	1471-2458	Study protocol: The effectiveness and cost effectiveness of an employer-led intervention to increase walking during the daily commute: a cluster randomised controlled trial	1397.4	TRUE			FALSE	cc-by	epmc_xml	oa	TRUE	ESRC	Wellcome Trust	MRC	MR/KO232331/1
PMC4537569	26275405	10.1186/s12874-015-0057-3	Biomed Central	BMC Medical Research Methodology	1471-2288	Comparison of Different Approaches to Estimating Age Standardized Net Survival	1397.4	TRUE			FALSE	cc-by	epmc_xml	oa	TRUE	Cancer Research UK	0	0	Funded through CRUK grant CRUK A13275, "Improving the understanding of the results from population-based cancer studies"	0	0
PMC4504413	26184413	10.1186/s12889-015-1951-7	BioMed Central	BMC Public Health	1471-2458	Examining the potential public health benefit of offering STI testing to men in amateur football clubs: Evidence from cross-sectional surveys	1397.4	TRUE			FALSE	cc-by	epmc_xml	oa	TRUE	Wellcome Trust	MRC / ESRC		NATSAL-3: 084840	NATSAL-3: G0701757
PMC4474561	26092292	10.1186/s12875-015-0290-1	BioMed Central	BMC Family Practice	1471-2296	Knowledge gaps and acceptability of abbreviated alcohol screening in general practice: a cross-sectional survey of hazardous and non-hazardous drinkers	1397.4	TRUE			FALSE	cc-by	epmc_xml	oa	TRUE	Wellcome Trust			WT106554AIA
PMC4446849	26016989	10.1186/s12885-015-1465-9	BioMed Central	BMC Cancer	1471-2407	Micro actions in colorectal cancer screening: participation in a population-based screening programme	1397.4	TRUE			FALSE	cc-by	epmc_xml	oa	TRUE	Cancer Research UK			C1418/A14134
PMC4410595	25886587	10.1186/s12889-015-1655-z	BioMed Central	BMC Public Health	1471-2458	Participatory womenâ€™s groups and counseling through home visits to improve child growth in rural eastern India: protocol for a cluster randomised controlled trial	1397.4	TRUE			FALSE	cc-by	epmc_xml	oa	TRUE	Wellcome Trust	MRC		099708/Z/12/Z
PMC4415115	25841285	10.1016/j.healthplace.2015.02.012	Elsevier	Health & Place	1353-8292, 1873-2054	Area deprivation and the food environment over time: A repeated cross-sectional study on takeaway outlet density and supermarket presence in Norfolk, UK, 1990â€“2008	1399.4	TRUE			FALSE	cc-by	epmc_xml	hybrid	TRUE	0	0	0	0	0	0
PMC4539346	26094597	10.1016/j.molbiopara.2015.06.001	Elsevier	Molecular & Biochemical Parasitology	0166-6851, 1872-9428	Identification of the minimal binding region of a Plasmodium falciparum IgM binding PfEMP1 domain	1399.68	TRUE			FALSE	cc-by	epmc_xml	hybrid	TRUE	Wellcome Trust	0	0	095831/Z/11/Z
PMC4528496	26150664	10.1098/rstb.2014.0298	Royal Society	Phil Trans R Soc B	0962-8436, 1471-2970	Building the microbiome in health and disease: niche construction and social conflict in bacteria	1400	TRUE			FALSE	cc-by	epmc_xml	hybrid	TRUE	Wellcome Trust	0	0	095831/Z/11/Z
PMC4528486	26150654	10.1098/rstb.2014.0288	Royal Society	Phil Trans R Soc B	0962-8436, 1471-2970	The within-host dynamics of African trypanosome infections	1400	TRUE			FALSE	cc-by	epmc_xml	hybrid	TRUE	Wellcome Trust	0	0	095831/Z/11/Z
PMC4503821	25997380	10.1016/j.ijlp.2015.04.008	Elsevier	International Journal of Law and Psychiatry	0160-2527, 1873-6386	Choice, Deliberation, Violence: Mental Capacity and Criminal Responsibility in Personality Disorder	1400.44	TRUE			FALSE	cc-by	epmc_xml	hybrid	TRUE	Wellcome Trust				90768
PMC4245794	25407818	10.1186/s12913-014-0574-5		BMC health services research	1472-6963	Community resistance to a peer education programme in Zimbabwe	1401.5	TRUE			FALSE	cc-by	epmc_xml	oa	TRUE	Wellcome Trust			084401/Z/07/Z
PMC4550464	26159287	10.1016/j.yhbeh.2015.07.003	Elsevier	Hormones & Behavior	0018-506X, 1095-6867	Peri-pubertal exposure to testicular hormones organizes response to novel environments and social behavior in adult male rats	1402.14	TRUE			FALSE	cc-by	epmc_xml	hybrid	TRUE	Wellcome Trust			097831/Z/11/Z
PMC4644991	26074200	10.1016/j.neuroimage.2015.05.092	Elsevier	NeuroImage	1053-8119, 1095-9572	Multi-level block permutation	1402.87	TRUE			FALSE	cc-by	epmc_xml	hybrid	TRUE	Wellcome Trust				098369/Z/12/Z
PMC4415114	0	10.1016/j.healthplace.2015.02.014	Elsevier	Health and Place	1353-8292, 1873-2054	Is local alcohol outlet density related to alcohol-related morbidity and mortality in Scottish cities?	1403.16	TRUE			FALSE	cc-by	epmc_xml	hybrid	TRUE	Wellcome Trust	0	0	092417/Z/10/Z			90532
PMC4600075	26452495	10.1186/s13550-015-0131-1	Springer	European Journal of Nuclear Medicine and Molecular Imaging Research	2191-219X	Rapid kit-based 68Ga labelling and PET imaging with THP-TyrÂ³-octreotate: A preliminary comparison with DOTA-TyrÂ³-octreotate	1404	TRUE			FALSE	cc-by	epmc_xml	oa	TRUE	CRUK and EPSRC	Wellcome Trust and Cancer Research UK	NIHR
PMC4503796	25827531	10.1016/j.virol.2015.03.015	Elsevier	Virology	0042-6822, 1096-0341	Immune evasion activities of accessory proteins Vpu, Nef and Vif are conserved in acute and chronic HIV-1 infection	1407.19	TRUE			FALSE	cc-by	epmc_xml	hybrid	TRUE	Wellcome Trust	MRC		WT093722MA	G1000196
PMC4270746	25521120	10.1371/journal.pntd.0003373	PLOS	PLoS Neglected Tropical Diseases	1935-2727, 1935-2735	Evaluation of the Diagnostic Accuracy of Prototype Rapid Tests for Human African Trypanosomiasis	1407.32	TRUE			FALSE	cc-by	epmc_xml	oa	TRUE	Wellcome	0	0	Senior Investigator Award (101842)	0	0
PMC4207469	25340788	10.1371/journal.pcbi.1003911	PLOS	PLoS Computational Biology	1553-734X, 1553-7358	Lipid clustering correlates with membrane curvature as revealed by molecular simulations of complex lipid bilayers	1408.04	TRUE			FALSE	cc-by	epmc_xml	oa	TRUE	Wellcome Trust				92970
PMC4422153	25927962	10.1186/s12977-015-0162-8	Biomed Central	Retrovirology	1742-4690	Genome-wide amplification of proviral sequences reveals new polymorphic HERV-K(HML-2) proviruses in humans and chimpanzees that are absent from genome assemblies	1411.2	TRUE			FALSE	cc-by	epmc_xml	oa	TRUE	Wellcome Trust	0	0	Wellcome Trust Value in People Award Fellowship (Acc. Code: RM33G0139)"Genome-wide analysis of HERV-K(HML-2) activity" following a Wellcome Trust Project Grant (Ref No: 075163/Z/04/Z) "The rate and spectrum of L1 retrotransposon insertions in the human germline"	0	0
PMC4331311	25887987	10.1186/s12863-015-0171-6	BioMed Central	BMC Genetics	1471-2156	A haploproficient interaction of the transaldolase paralogue NQM1 with the transcription factor VHR1 affects stationary phase survival and oxidative stress resistance	1411.5	TRUE			FALSE	cc-by	epmc_xml	oa	TRUE	0	0	0	0	0	0
PMC4494644	25934411	10.1186/s12913-015-0853-9	BioMed Central	BMC Health Services Research	1472-6963	Adolescents leaving mental health or social care services: predictors of mental health and psychosocial outcomes one year later	1411.5	TRUE			FALSE	cc-by	epmc_xml	oa	TRUE	0	0	0	0	0	0
PMC4245775	25421440	10.1186/s12875-014-0185-6	BioMed Central	BMC Family Practice	1471-2296	Association of self-rated health with multimorbidity, chronic disease and psychosocial factors in a large middle-aged and older cohort from general practice: a cross-sectional study	1411.5	TRUE			FALSE	cc-by	epmc_xml	oa	TRUE	0	0	0	0	0	0
PMC4406179	25919761	10.1186/s13058-014-0492-9	BioMed Central	Breast Cancer Research	1465-5411, 1465-542X	Associations of common breast cancer susceptibility alleles with risk of breast cancer subtypes in BRCA1 and BRCA2 mutation carriers	1411.5	TRUE			FALSE	cc-by	epmc_xml	oa	TRUE	0	0	0	0	0	0
PMC4484708	25897948	10.1186/s13058-015-0570-7	BioMed Central	Breast Cancer Research	1465-5411, 1465-542X	Common germline polymorphisms associated with breast cancer specific survival	1411.5	TRUE			FALSE	cc-by	epmc_xml	oa	TRUE	0	0	0	0	0	0
PMC4369347	25881192	10.1186/s13063-015-0583-7	BioMed Central	Trials	1745-6215	Effective recruitment of participants to a phase I study using the internet and publicity releases through charities and patient organisations: analysis of the adaptive study of IL-2 dose on regulatory T cells in type 1 diabetes (DILT1D)	1411.5	TRUE			FALSE	cc-by	epmc_xml	oa	TRUE	0	0	0	0	0	0
PMC4265394	25472026	10.1186/1471-2407-14-908	BioMed Central	BMC Cancer	1471-2407	Inclusion of KI67 significantly improves performance of the PREDICT prognostication and prediction model for early breast cancer	1411.5	TRUE			FALSE	cc-by	epmc_xml	oa	TRUE	0	0	0	0	0	0
PMC4359432	25889091	10.1186/s12938-015-0009-5	BioMed Central	BioMedical Engineering OnLine	1475-925X	Modelling endogenous insulin concentration in type 2 diabetes during closed-loop insulin delivery	1411.5	TRUE			FALSE	cc-by	epmc_xml	oa	TRUE	0	0	0	0	0	0
PMC4422318	25374254	10.1186/s12858-014-0024-3	BioMed Central	BMC Biochemistry	1471-2091	Phosphorylation in intrinsically disordered regions regulates the activity of Neurogenin2	1411.5	TRUE			FALSE	cc-by	epmc_xml	oa	TRUE	0	0	0	0	0	0
PMC4339749	25888290	10.1186/s12859-015-0496-1	BioMed Central	BMC Bioinformatics	1471-2105	The effect of rare variants on inflation of the test statistics in caseâ€“control analyses	1411.5	TRUE			FALSE	cc-by	epmc_xml	oa	TRUE	0	0	0	0	0	0
PMC4429974	25935418	10.1186/s12883-015-0324-2	BioMed Central	BMC Neurology	1471-2377	MS in South Asians in England: early disease onset and novel pattern of myelin autoimmunity	1411.5	TRUE			FALSE	cc-by	epmc_xml	oa	TRUE	WT			WT087999MA
PMC4422463	25928765	10.1186/s12859-015-0568-2	Biomed Central	BMC Bioinformatics	1471-2105	coMET: visualisation of regional epigenome-wide association scan results and DNA co-methylation patterns	1411.5	TRUE			FALSE	cc-by	epmc_xml	oa	TRUE	Wellcome Trust	European Research Council	TwinsUK resource	082713/Z/07/Z	ERC 250157	FP7/2007-2013
PMC4260184	25700144	10.1186/s12913-014-0594-1	Biomed Central	BMC Health Services Research	1472-6963	Process evaluation of a point-of-care cluster randomised trial using a computer-delivered intervention to reduce antibiotic prescribing in primary care	1411.5	TRUE			FALSE	cc-by	epmc_xml	oa	TRUE	Wellcome Trust			086129/Z/08/Z
PMC4320469	25526881	10.1186/1471-2407-14-985	Biomed Central	BMC Cancer	1471-2407	Serum glucose and risk of cancer: A Meta-analysis	1411.5	TRUE			FALSE	cc-by	epmc_xml	oa	TRUE	Cancer Research UK			C16736/A7957
PMC4349795	0	10.1186/s12992-015-0096-x	Biomed Central	Globalization and Health	1744-8603	Why is patient safety so hard in low-income countries? A qualitative study of healthcare workersâ€™ views in two African hospitals	1411.5	TRUE			FALSE	cc-by	epmc_xml	oa	TRUE	Wellcome Trust	0	0	WT097899M	0	0
PMC4192757	25277130	10.1186/1471-2164-15-841	BioMed Central	BMC Genomics	1471-2164	A systematic analysis of protein palmitoylation in Caenorhabditis elegans	1411.5	TRUE			FALSE	cc-by	epmc_xml	oa	TRUE	Wellcome Trust			086737/Z/08/Z
PMC4355574	25888722	10.1186/s13075-015-0544-2	Biomed Central	Arthritis Research & Therapy	1478-6354, 1478-6362	Transcriptome analysis of ageing in uninjured human Achilles tendon	1411.5	TRUE			FALSE	cc-by	epmc_xml	oa	TRUE	MRC-ARUK 50%	BBSRC 25%	Wellcome 25%
PMC4438518	25981526	10.1186/s12889-015-1821-3	Biomed Central	BMC Public Health	1471-2458	Visual perceptions of male obesity: A cross-cultural study examining male and female lay perceptions of obesity in Caucasian males	1411.5	TRUE			FALSE	cc-by	epmc_xml	oa	TRUE	Wellcome Trust			097826/Z/11/A
PMC4423134	25907583	10.1186/s12874-015-0032-z	BioMed Central	BioMed Central Medical Research Methodology	1471-2288	Can obtaining informed consent alter self-reported drinking behaviour? A methodological experiment.	1411.5	TRUE			FALSE	cc-by	epmc_xml	oa	TRUE	Wellcome Trust			WT086516MA
PMC4413531	25902705	10.1186/s13063-015-0702-5	BioMed Central	Trials	1745-6215	The Lake Victoria island intervention study on worms and allergy-related diseases (LaVIISWA): study protocol for a randomised controlled trial.	1411.5	TRUE			FALSE	cc-by	epmc_xml	oa	TRUE	Wellcome Trust			WT095778
PMC4337092	25765960	10.1186/s12864-015-1247-4	Biomed Central	B M C Genomics	1471-2164	H2A.Z marks antisense promoters and has positive effects on antisense transcript levels in budding yeast.	1411.5	TRUE			FALSE	cc-by	epmc_xml	oa	TRUE
PMC4272533	25471696	10.1186/s13075-014-0483-3	Biomed Central	Arthritis Research & Therapy	1478-6354, 1478-6362	Rheumatoid Factor and Anti-Citrullinated Protein Antibody positivity, but not level, are associated with increased mortality in patients with rheumatoid arthritis: results from two large independent cohorts	1411.5	TRUE			FALSE	cc-by	epmc_xml	oa	TRUE
PMC4189162	0	10.1186/1471-2261-14-128	BioMed Central	BMC Cardiovascular Disorders	1471-2261	Utility of NT-proBNP as a rule-out test for left ventricular dysfunction in very old people with limiting dyspnoea: the Newcastle 85+ study	1411.5	TRUE			FALSE	cc-by	epmc_xml	oa	TRUE	British Heart Foundation	0	0	PG/08/026/24712	0	0
PMC4263020	25476021	10.1186/s12860-014-0041-5	BioMed Central	BMC Cell Biology	1471-2121	A thin layer angiogenesis assay: a modified basement matrix assay for assessment of endothelial cell differentiation	1411.5	TRUE			FALSE	cc-by	epmc_xml	oa	TRUE	British Heart Foundation (PG/11/39/28890 to DBB).
PMC4482099	26115658	10.1186/s12864-015-1696-9	BioMed Central	BMC Genomics	1471-2164	Global analyses of TetR family transcriptional regulators in mycobacteria indicates conservation across species and diversity in regulated functions	1411.5	TRUE			FALSE	cc-by	epmc_xml	oa	TRUE
PMC4504163	26177812	10.1186/s13063-015-0818-7	Biomed Central	Trials	1745-6215	Podoconiosis treatment in northern Ethiopia (GoLBet): study protocol for a randomised controlled trial	1411.5	TRUE			FALSE	cc-by	epmc_xml	oa	TRUE	Wellcome Trust			MR/K007211/1
PMC4429239	25979287	10.1016/j.epidem.2015.03.002	Elsevier	Epidemics	1755-4365, 1878-0067	Dengue disease outbreak definitions are implicitly variable	1413.52	TRUE			FALSE	cc-by	epmc_xml	oa	TRUE	Wellcome Trust				095066/Z/10/Z
PMC4383363	25315129	10.1016/j.bbr.2014.09.050	Elsevier	Behavioural Brain Research	0166-4328, 1872-7549	Neural circuitry for rat recognition memory	1413.6	TRUE			FALSE	cc-by	epmc_xml	hybrid	TRUE	BBSRC	Wellcome Trust		BB7/S18861	BB100310X1	WT87855
PMC4539340	25982270	10.1016/j.molbiopara.2015.05.003	Elsevier	Molecular and Biochemical Parasitology	0166-6851, 1872-9428	Crystal structure of the C-terminal domain of tubulin-binding cofactor C from Leishmania major	1418.4	TRUE			FALSE	cc-by	epmc_xml	hybrid	TRUE	Wellcome Trust				82593	94090
PMC4288183	25520198	10.1093/nar/gku1292	Oxford University Press	Nucleic Acids Research	0305-1048, 1362-4962	Subgenomic Promoter Recognition by the Norovirus RNA-1! dependent RNA polymerases	1420	TRUE			FALSE	cc-by	epmc_xml	oa	TRUE	0	0	0	0	0	0
PMC4446433	25901030	10.1093/nar/gkv373	Oxford University Press	Nucleic Acids Research	0305-1048, 1362-4962	Crystal structure of the Bloom's syndrome helicase indicates a role for the HRDC domain in conformational changes	1420	TRUE			FALSE	cc-by	epmc_xml	oa	TRUE	Wellcome Trust				092809/Z/10/Z
PMC4357723	25712096	10.1093/nar/gkv122	Oxford University Press	Nucleic Acids Research	0305-1048, 1362-4962	Structural plasticity of Cid1 provides a basis of its distributive RNA terminal uridylyl transferase activity	1420	TRUE			FALSE	cc-by	epmc_xml	oa	TRUE	Wellcome Trust				90532
PMC4612446	26291885	10.1016/j.jneumeth.2015.08.009	Elsevier	Journal of Neuroscience Methods	0165-0270, 1872-678X	Optimising a model-based approach to inferring fear learning from skin conductance responses	1421.08	TRUE			FALSE	cc-by	epmc_xml	hybrid	TRUE	Wellcome Trust			091593/Z/10/Z
PMC4319069	25596170	10.2196/jmir.3479	Journal of Medical Internet Research	Journal of Medical Internet Research	1439-4456, 1438-8871	Preliminary evaluation of SF28 â€“ a mobile application to aid smoking cessation	1424.74	TRUE			FALSE	cc-by	epmc_xml	oa	TRUE	Cancer Research UK			C1417/A7972
PMC4199771	25329577	10.1371/journal.ppat.1004429	PLOS	Plos Pathogens	1553-7366, 1553-7374	Novel cyclic di-GMP effectors of the YajQ protein family control bacterial virulence	1426	TRUE			FALSE	cc-by	epmc_xml	oa	TRUE	Wellcome Trust				100204/Z/12/Z
PMC4488845	26132169	10.1371/journal.pgen.1005230	PLOS	PLoS Genetics	1553-7390, 1553-7404	Discovery and fine-mapping of glycaemic and obesity-related trait loci using high-density imputation	1427.5	TRUE			FALSE	cc-by	epmc_xml	oa	TRUE	Wellcome Trust				H7RXIQ00
PMC4582187	26169395	10.1242/?jcs.165209	The Company of Biologists	Journal of Cell Science	0021-9533, 1477-9137	SGTA binding to Rpn13 selectively modulates protein quality control	1432.76	TRUE			FALSE	cc-by	epmc_xml	hybrid	TRUE
PMC4456406	26042734	10.1371/journal.ppat.1004882	PLOS	PLoS Pathogens	1553-7366, 1553-7374	Host reticulocytes provide metabolic reservoirs that can be exploited by malaria parasites	1434.76	TRUE			FALSE	cc-by	epmc_xml	oa	TRUE	Wellcome Trust			083811/Z/07/Z
PMC4506582	26187846	10.1186/s12936-015-0801-5	BioMed Central	Malaria Journal	1475-2875	Plasmodium falciparum coronin organizes arrays of parallel actin filaments potentially guiding directional motility in invasive malaria parasites	1437	TRUE			FALSE	cc-by	epmc_xml	oa	TRUE	WT			100993/Z/13/Z
PMC4583163	26403288	10.1186/s12936-015-0897-7	Biomed Central	Malaria Journal	1475-2875	Grading fluorescein angiograms in malarial retinopathy	1437	TRUE			FALSE	cc-by	epmc_xml	oa	TRUE	Wellcome Trust			092668/Z/10/Z
PMC4419413	25889960	10.1186/s12936-015-0661-z	BioMed Central	Malaria Journal	1475-2875	Sample size determination for estimating antibody seroconversion rate under stable malaria transmission intensity.	1437	TRUE			FALSE	cc-by	epmc_xml	oa	TRUE	Wellcome Trust			WT091924
PMC4529188	26252219	10.1371/journal.ppat.1005056	PLOS	PLoS Pathogens	1553-7366, 1553-7374	Widespread reassortment shapes the evolution and epidemiology of Bluetongue virus following European invasion	1439.82	TRUE			FALSE	cc-by	epmc_xml	oa	TRUE	Wellcome Trust			092806/B/10/Z
PMC4345454	25673686	10.1098/rspb.2014.2849	Royal Society Publishing	Proceedings of the Royal Society B	0962-8452, 1471-2954	Where is the UKâ€™s pollinator biodiversity? The importance of urban areas for flower-visiting insects	1440	TRUE			FALSE	cc-by	epmc_xml	hybrid	TRUE	BBSRC	Wellcome Trust	NERC	BB/I00047X/1
PMC4590462	26063841	10.1098/rspb.2014.1766	Royal Society Publishing	Proceedings of the Royal Society B	0962-8452, 1471-2954	Choice mechanisms for past, temporally extended outcomes	1440	TRUE			FALSE	cc-by	epmc_xml	hybrid	TRUE	0	0	0	0	0	0
PMC4528573	26040592	10.1098/rsif.2014.1358	Royal Society Publishing	Journal of the Royal Society Interface	1742-5689, 1742-5662	Metachronal waves in the flagellar beating of Volvox and their hydrodynamic origin	1440	TRUE			FALSE	cc-by	epmc_xml	hybrid	TRUE	0	0	0	0	0	0
PMC4528826	26240429	10.1098/rstb.2014.0214	Royal Society Publishing	Philosophical Transactions of the Royal Society B: Biological Sciences	0962-8436, 1471-2970	The impact of neuroscience on society: Cognitive enhancement in neuropsychiatric disorders and in healthy people	1440	TRUE			FALSE	cc-by	epmc_xml	hybrid	TRUE	0	0	0	0	0	0
PMC4389791	25761368	10.1098/rsob.140156	The Royal Society Publishing	Open Biology	2046-2441	Cellular responses to a prolonged delay in mitosis are determined by a DNA damage response controlled by Bcl-2 family proteins	1440	TRUE			FALSE	cc-by	epmc_xml	oa	TRUE	Worldwide Cancer Research	Cancer Research UK			12-0105 (WCR)	C275/A13424 (CRUK)
PMC4426616	0	10.1098/rspb.2014.3027	Royal Society	Proceedings of the Royal Society, series B	0962-8452, 1471-2954	Hybridisation and pre-zygotic reproductive barriers in Plasmodium	1440	TRUE			FALSE	cc-by	epmc_xml	hybrid	TRUE	Wellcome Trust	0	0	095831/Z/11/Z
PMC4528487	26150655	10.1098/rstb.2014.0289	Royal Society	Philosophical Transactions of The Royal Society B	0962-8436, 1471-2970	How is the effectiveness of immune surveillance impacted by the spatial distribution of spreading infections?	1440	TRUE			FALSE	cc-by	epmc_xml	hybrid	TRUE
PMC4277090	25411407	10.1098/rsif.2014.1004	The Royal Society	Interface	1742-5689, 1742-5662	Spatial analyses of wildlife contact networks	1440	TRUE			FALSE	cc-by	epmc_xml	hybrid	TRUE	NERC	Wellcome Trust		(075202/Z/04/Z)
PMC4571574	0	10.1098/rstb.2014.0336	Royal Society	Philosophical Transactions of the Royal Society B: Biological Sciences	0962-8436, 1471-2970	New substitutional models for rooting phylogenetic trees	1440	TRUE			FALSE	cc-by	epmc_xml	hybrid	TRUE	Wellcome Trust	0	0	089803/Z/09/Z	0	0
PMC4313374	25567099	10.1098/rsob.140197	Royal Society	Open Biology	2046-2441	A toolkit enabling efficient, scalable and reproducible gene tagging in trypanosomatids	1440	TRUE			FALSE	cc-by	epmc_xml	oa	TRUE	Wellcome Trust				066839/B/02/Z
PMC4387530	25694543	10.1098/rsif.2014.1403	The Royal Society	Interface	1742-5689, 1742-5662	Sources of variability in cytosolic calcium transients triggered by stimulation of homogeneous uro-epithelial cell monolayers	1440	TRUE			FALSE	cc-by	epmc_xml	hybrid	TRUE	Wellcome Trust	#REF!	#REF!	090577/Z/09/Z	#REF!	#REF!
PMC4387510	25823866	10.1098/rstb.2014.0169	Royal Society	Philosophical Transactions of the Royal Society B	0962-8436, 1471-2970	Cerebral hierarchies: predictive processing, precision and the pulvinar	1440	TRUE			FALSE	cc-by	epmc_xml	hybrid	TRUE	Wellcome Trust			088130/Z/09/Z
PMC4387527	25788538	10.1098/rsif.2014.1383	Royal Society	Interface	1742-5689, 1742-5662	Knowing ones place: a free energy approach to pattern regulation	1440	TRUE			FALSE	cc-by	epmc_xml	hybrid	TRUE	Wellcome Trust			088130/Z/09/Z
PMC4345473	25589574	10.1098/rsif.2014.1059	Royal Society Publishing	Journal of the Royal Society Interface	1742-5689, 1742-5662	Using Argument Notation to Engineer Biological Simulations with Increased Confidence	1440	TRUE			FALSE	cc-by	epmc_xml	hybrid	TRUE	Wellcome Trust	EPSRC	0	097829/Z/11/A	EP/E053505/1	0
PMC4358711	25848859	10.1186/s12933-015-0193-4	Biomed Central	Cardiovascular Diabetology	1475-2840	Design and rationale for the randomised, double-blinded, placebo-controlled Liraglutide to Improve corONary haemodynamics during Exercise streSS (LIONESS) crossover study	1443.3	TRUE			FALSE	cc-by	epmc_xml	oa	TRUE	British Heart Foundation	NIHR Biomedical Research Centre		FS/11/70/28917
PMC4488379	26125585	10.1371/journal.pntd.0003905	PLOS	PLOS Neglected Tropical Diseases	1935-2727, 1935-2735	Failure of PCR to Detect Treponema pallidum ssp. pertenue DNA in Blood in Latent Yaws	1443.7	TRUE			FALSE	cc0	epmc_xml	oa	TRUE	Wellcome Trust			WT102807
PMC4301037	25238254	10.1021/cb5006323	American Chemical Society	ACS Chemical Biology	1554-8929, 1554-8937	Identification and Structureâ€“Function Analysis of Subfamily Selective G Protein-Coupled Receptor Kinase Inhibitors	1447.88	TRUE			FALSE	cc-by	epmc_xml	hybrid	TRUE	Wellcome Trust				092809/Z/10/Z
PMC4524711	26241484	10.1371/journal.pntd.0003988	PLOS	PLOS Neglected Tropical Diseases	1935-2727, 1935-2735	Impact of community mass treatment with azithromycin for trachoma elimination on the prevalence of yaws.	1451.33	TRUE			FALSE	cc0	epmc_xml	oa	TRUE	Wellcome Trust			WT102807
PMC4451497	0	10.1016/j.imbio.2015.01.013	Elsevier	Immunobiology	0171-2985, 1878-3279	The adult murine heart has a sparse, phagocytically active macrophage population that expands through monocyte recruitment and adopts an 'M2' phenotype in response to Th2 immunologic challenge	1451.52	TRUE			FALSE	cc-by	epmc_xml	hybrid	TRUE	Wellcome Trust	0	0	WT091729MA
PMC4655917	26342528	10.1016/j.neuroimage.2015.08.057	Elsevier	Neuroimage	1053-8119, 1095-9572	Profiling neuronal ion channelopathies with non-invasive brain imaging and dynamic causal models: Case studies of single gene mutations	1453.31	TRUE			FALSE	cc-by	epmc_xml	hybrid	TRUE	Wellcome Trust	MRC		091593/Z/10/Z	MR/K000608/1, MR/K000608/1
PMC4256090	25474638	10.1371/journal.pgen.1004767	PLOS	Plos Genetics	1553-7390, 1553-7404	Tetraspanin (TSP-17) Protects Dopaminergic Neurons against 6-OHDA-Induced Neurodegeneration in C. elegans	1454.55	TRUE			FALSE	cc-by	epmc_xml	oa	TRUE	Wellcome Trust				090944/Z/09/Z
PMC4310597	25632942	10.1371/journal.pntd.0003496	PLOS	PLOS Neglect	1935-2727, 1935-2735	A cross-sectional study of 'yaws' in districts of ghana which have previously undertaken azithromycin mass drug administration for trachoma control.	1456.03	TRUE			FALSE	cc0	epmc_xml	oa	TRUE	Wellcome Trust			WT102807
PMC4581475	26399536	10.1186/s12879-015-1109-3	Biomed Central	BMC Infectious Diseases	1471-2334	An integrated model of care for neurological infections: the first 6 years of referrals to a specialist service at a university teaching hospital in Northwest England	1456.8	TRUE			FALSE	cc-by	epmc_xml	oa	TRUE	Wellcome Trust			087757/Z/08/Z
PMC4356562	25760349	10.1371/journal.ppat.1004723	PLOS	PLOS Pathogens	1553-7366, 1553-7374	Vaccinia Virus Protein Complex F12/E2 Interacts with Kinesin Light Chain Isoform 2 to Engage the Kinesin-1 Motor Complex	1456.99	TRUE			FALSE	cc-by	epmc_xml	oa	TRUE	0	0	0	0	0	0
PMC4419465	25887553	10.1186/s12864-015-1495-3	BioMed Central	BMC Genomics	1471-2164	Common binding by redundant group B Sox proteins is evolutionarily conserved in Drosophila	1457.4	TRUE			FALSE	cc-by	epmc_xml	oa	TRUE	0	0	0	0	0	0
PMC4460688	26055083	10.1186/s12864-015-1650-x	BioMed Central	BMC Genomics	1471-2164	Expansion of the HSFY gene family in pig lineages	1457.4	TRUE			FALSE	cc-by	epmc_xml	oa	TRUE	0	0	0	0	0	0
PMC4392876	25889361	10.1186/s12943-015-0339-8	BioMed Central	Molecular Cancer	1476-4598	Deregulation of the FOXM1 target gene network and its coregulatory partners in oesophageal adenocarcinoma	1457.4	TRUE			FALSE	cc-by	epmc_xml	oa	TRUE
PMC4557947	26332995	10.1371/journal.pone.0136717	BioMed Central	Trials	1932-6203	Assessment of LifeLab Southampton: engaging teenagers in improving their health behaviours and increasing their interest in science. Study protocol for a cluster randomized controlled trial	1457.4	TRUE			FALSE	cc-by	epmc_xml	oa	TRUE	British Heart Foundation			PG/14/33/30827
PMC4008236	24444341	10.1111/imm.12253	Wiley	Immunology	0019-2805, 1365-2567	TAPBPR isoforms exhibit altered association with MHC class I	1461.01	TRUE			FALSE	cc-by	epmc_xml	hybrid	TRUE	0	0	0	0	0	0
PMC4441035	25917672	10.1016/j.vaccine.2015.04.053	Elsevier	Vaccine	0264-410X, 1873-2518	Methods and challenges in measuring the impact of national pneumococcal and rotavirus vaccine introduction on morbidity and mortality in Malawi	1462.03	TRUE			FALSE	cc-by	epmc_xml	hybrid	TRUE	Wellcome Trust			091909/Z/10/Z
PMC4681064	0	10.1099/vir.0.000145	Society for General Microbiology	Journal of General Virology	0022-1317, 1465-2099	The hepatitis C virus NS5A protein blocks EGFR degradation via a proline motif dependent interaction	1470	TRUE			FALSE	cc-by	epmc_xml	hybrid	TRUE	Wellcome Trust	0	0	WT096670	0	0
PMC4504473	26181518	10.1371/journal.ppat.1005003	PLOS	PLOS Pathogens	1553-7366, 1553-7374	Existing infection facilitates establishment and density of malaria parasites in their mosquito vector	1471.88	TRUE			FALSE	cc-by	epmc_xml	oa	TRUE	Wellcome Trust	0	0	095831/Z/11/Z
PMC4215230	25190808	10.1074/jbc.M114.568154	American Society for Biochemistry and Molecular Biology, Inc.	Journal of Biological Chemistry	0021-9258, 1083-351X	Incorporation of pentraxin 3 into hyaluronan matrices is tightly regulated and promotes matrix cross-linking	1474.56	TRUE			FALSE	cc-by	epmc_xml	hybrid	TRUE
PMC4427651	25984249	10.1007/s13239-014-0203-9	Springer	Cardiovascular Engineering and Technology	1869-408X, 1869-4098	A technical review of minimally invasive mitral valve replacements	1477.3	TRUE			FALSE	cc-by	epmc_xml	hybrid	TRUE	British Heart Foundation
PMC4320303	25431266	10.1007/s00125-014-3448-9	Springer	Diabetologia	0012-186X, 1432-0428	Age trajectories of glycaemic traits in non-diabetic South Asian and white individuals: the Whitehall II cohort study	1477.3	TRUE			FALSE	cc-by	epmc_xml	hybrid	TRUE	British Heart Foundation	MRC		(RG/ 47213/2/30098)	K013351
PMC4297286	25411121	10.1007/s11695-014-1507-4	Springer	Obesity Surgery	0960-8923, 1708-0428	Chronic Elevation of Systemic Glucagon-Like Peptide-1 Following Surgical Weight Loss: Association with Nausea and Vomiting and Effects on Adipokines	1477.3	TRUE			FALSE	cc-by	epmc_xml	hybrid	TRUE	British Heart Foundation			FS/13/5/29,927
PMC4250560	25449894	10.1007/s00395-014-0452-7	Springer	Basic Research in Cardiology	0300-8428, 1435-1803	Distinct cardioprotective mechanisms of immediate, early and delayed ischaemic postconditioning	1477.3	TRUE			FALSE	cc-by	epmc_xml	hybrid	TRUE	Wellcome Trust / British Heart Foundation			95064
PMC4445768	25500760	10.1007/s10995-014-1634-5	Springer	Maternal and Child Health Journal	1092-7875, 1573-6628	Households with a stunted child and obese mother: trends and child feeding practices in a middle-income country, 1992 - 2008	1477.3	TRUE			FALSE	cc-by	epmc_xml	hybrid	TRUE	Wellcome Trust			WT088536MA
PMC4229645	25354803	10.1007/s00383-014-3615-6	Springer	Pediatric Surgery International	0179-0358, 1437-9813	Isolation of esophageal stem cells with potential for therapy	1477.3	TRUE			FALSE	cc-by	epmc_xml	hybrid	TRUE	Wellcome Trust	MRC
PMC4355441	25391615	10.1007/s10689-014-9769-5	Springer	Familial Cancer	1389-9600, 1573-7292	Population-based genetic risk prediction and stratification for ovarian cancer: views from women at high risk	1477.3	TRUE			FALSE	cc-by	epmc_xml	hybrid	TRUE	Cancer Research UK			508007
PMC4250562	25449895	10.1007/s00395-014-0453-6	Springer	Basic Research in Cardiology	0300-8428, 1435-1803	Remote ischemic conditioning: from experimental observation to clinical application: report from the 8th Biennial Hatter Cardiovascular Institute Workshop	1477.3	TRUE			FALSE	cc-by	epmc_xml	hybrid	TRUE	British Heart Foundation	MRC		FS/10/039/28270 and FS 12/70/30009	MR/K002066/1
PMC4338364	25408304	10.1007/s11548-014-1124-7	Springer	International Journal of Computer Assisted Radiology and Surgery	1861-6410, 1861-6429	The NifTK software platform for image-guided interventions: platform overview and NiftyLink messaging	1477.3	TRUE			FALSE	cc-by	epmc_xml	hybrid	TRUE	Wellcome Trust	EPSRC / MRC			EP/H046410/1, 956 EP/F025750/1, EP/H046410/1, EP/J020990/1, EP/K005278; MR/J01107X/1
PMC4287497	25569479	10.1371/journal.pgen.1004931	PLOS	Plos Genetics	1553-7390, 1553-7404	Phosphorylation of Elp1 by Hrr25 Is Required for Elongator-Dependent tRNA Modification in Yeast	1477.85	TRUE			FALSE	cc-by	epmc_xml	oa	TRUE	Wellcome Trust				083524/Z/17/Z
PMC4523888	26300741	10.3389/fnana.2015.00103	Frontiers	Frontiers in Neuroanatomy	1662-5129	Calcium-binding protein immunoreactivity in Guddenâ€™s tegmental nuclei and the hippocampal formation: differential co-localization in neurons projecting to the mammillary bodies.	1480.04	TRUE			FALSE	cc-by	epmc_xml	oa	TRUE	Wellcome Trust			WT090954AIA
PMC4287558	25569180	10.1371/journal.pntd.0003448	PLOS	PLoS Neglected Tropical Diseases	1935-2727, 1935-2735	Tsetse GmmSRPN10 has Anti-complement Activity and is Important for Successful Establishment of Trypanosome Infections in the Fly Midgut	1480.21	TRUE			FALSE	cc-by	epmc_xml	oa	TRUE	Wellcome Trust			WT093691/Z/10/Z
PMC4249111	25210166	10.1128/jvi.01636-14		Journal of virology	0022-538X, 1098-5514	Accumulation of human-adapting mutations during circulation of A(H1N1)pdm09 influenza in humans in the UK	1480.39	TRUE			FALSE	cc-by	epmc_xml	hybrid	TRUE	Wellcome Trust			090382/Z/09/Z
PMC4211304	25238611	10.1021/jm5011397		Journal of medicinal chemistry	0022-2623, 1520-4804	Structure-Based Design of Potent and Selective Leishmania N-Myristoyltransferase Inhibitors	1480.39	TRUE			FALSE	cc-by	epmc_xml	hybrid	TRUE	Wellcome Trust			087792/B/08/Z
PMC4482744	0	10.1371/journal.pntd.0003861	PLOS	PloS Neglected Tropical Diseases	1935-2727, 1935-2735	Differences in the Faecal Microbiome in Schistosoma haematobium Infected Children vs. Uninfected Children	1482.06	TRUE			FALSE	cc-by	epmc_xml	oa	TRUE	Wellcome Trust	0	0	095831/Z/11/Z
PMC4447398	26020959	10.1371/journal.ppat.1004888	PLOS	PLOS Pathogens	1553-7366, 1553-7374	Admixture in humans of two divergent Plasmodium knowlesi populations associated with different macaque host species.	1482.41	TRUE			FALSE	cc-by	epmc_xml	oa	TRUE	Medical Research Council (MRC)			G1100123
PMC4430253	25970613	10.1371/journal.pntd.0003763	PLOS	PLoS Neglected Tropical Diseases	1935-2727, 1935-2735	Pathogenesis of progressive scarring trachoma in ethiopia and Tanzania and its implications for disease control: two cohort studies.	1482.41	TRUE			FALSE	cc-by	epmc_xml	oa	TRUE	Wellcome Trust			WT098481/Z/12/Z
PMC4489650	26134678	10.1371/journal.pgen.1005345	PLOS	PLoS Genetics	1553-7390, 1553-7404	Aurora-A-dependent control of TACC3 influences the rate of mitotic spindle assembly	1492.54	TRUE			FALSE	cc-by	epmc_xml	oa	TRUE	Cancer Research UK	0	0	Structural and mechanistic insights into the pathways of mitotic regulation C24461/A12772	0	0
PMC4203902	25277108	10.1186/s13023-014-0151-3	BioMed Central	Orphanet Journal of Rare Diseases	1750-1172	Natural history of angiomyolipoma in lymphangioleiomyomatosis: implications for screening and surveillance	1494.3	TRUE			FALSE	cc-by	epmc_xml	oa	TRUE	Wellcome
PMC4358978	25768796	10.1371/journal.pntd.0003558	PLOS	PLOS Neglected Tropical Disease	1935-2727, 1935-2735	Epilation for minor trachomatous trichiasis: four-year results of a randomised controlled trial.	1497.8	TRUE			FALSE	cc-by	epmc_xml	oa	TRUE	Wellcome Trust			WT098481/Z/12/Z
PMC4449115	25116404	10.1002/eji.201444671	Wiley	European Journal of Immunology	0014-2980, 1521-4141	IL-33 attenuates the development of experimental autoimmune uveitis	1500	TRUE			FALSE	cc-by	epmc_xml	hybrid	TRUE	Wellcome Trust			080217/Z/06/Z
PMC4403965	25808224	10.1111/ele.12428	Wiley	Ecology Letters	1461-023X, 1461-0248	Linking anthropogenic resources to wildlife-pathogen dynamics: a review and meta-analysis	1500	TRUE			FALSE	cc-by	epmc_xml	hybrid	TRUE	Wellcome Trust			102507/Z/13/Z
PMC4284040	25236797	10.1002/eji.201444859	Wiley	European Journal of Immunology	0014-2980, 1521-4141	Signal Regulatory Protein alpha (SIRPa) regulates the homeostasis of CD103+CD11b+ DCs in the intestinal lamina propria	1500	TRUE			FALSE	cc-by	epmc_xml	hybrid	TRUE	Wellcome Trust			89892
PMC4409857	25546822	10.1002/art.39004	Wiley	Arthritis & Rheumatology	2326-5191, 2326-5205	The parasitic worm product, ES-62 targets MyD88-dependent effector mechanisms to suppress ANA production and proteinuria in MRL/Lpr mice	1500	TRUE			FALSE	cc-by	epmc_xml	hybrid	TRUE	Wellcome Trust			086852/Z/08/Z
PMC4336563	24580102	10.1111/acps.12254	Wiley	Acta Psychiatrica Scandinavica	0001-690X, 1600-0447	A Meta-Analysis of Ethnic Differences in Pathways to Care at the First Episode of Psychosis	1500	TRUE			FALSE	cc-by	epmc_xml	hybrid	TRUE	Canadian Institutes of Health Research	MRC	Wellcome Trust	220976	G0500817	WT087417
PMC4393210	25713328	10.14814/phy2.12302	Wiley	Physiological Reports	2051-817X	Cardiac Adaptations from 4 weeks of Intensity-controlled Vigorous Exercise are Lost after a Similar Period of Detraining	1500	TRUE			FALSE	cc-by	epmc_xml	oa	TRUE	British Heart Foundation	European Union	European Union	PG 08/085	PIRG02-GA-2007-224853 to G.M.E	CARE-MI FP7-HEALTH-2009 (242038); Endostem FP7-HEALTH-2009 (241440)
PMC4683053	26678393	10.1111/jbi.12534	Wiley	Journal of Biogeography	1935-2727, 1935-2735	Spatial distribution patterns of plague hosts: point pattern analysis of the burrows of great gerbils in Kazakhstan	1500	TRUE			FALSE	cc-by	epmc_xml	oa	TRUE	Wellcome Trust			090213/Z/09/Z
PMC4409838	25740698	10.1002/jhbs.21715	Wiley	Journal of the History of the Behavioral Sciences	0022-5061, 1520-6696	Making Animals Alcoholic: Shifting Laboratory Models of Addiction	1500	TRUE			FALSE	cc-by	epmc_xml	hybrid	TRUE	Wellcome Trust			100433
PMC4303378	25630254	10.1113/jphysiol.2014.288258	Wiley	Journal of Physiology	0022-3751, 1469-7793	Women and the early Journal of Physiology	1500	TRUE			FALSE	cc-by	publisher	hybrid	TRUE	Wellcome Trust			WT097271/Z/11/Z
PMC4309485	25353308	10.1111/jth.12771	Wiley	Journal of Thrombosis and Haemostasis	1538-7933, 1538-7836	Plasma free fatty acid levels influence Zn2+-dependent histidine-rich glycoprotein-heparin interactions via an allosteric switch on serum albumin	1500	TRUE			FALSE	cc-by	epmc_xml	hybrid	TRUE		British Heart Foundation			FS/10/036/28352
PMC4660437	26193063	10.1002/oby.21147	Wiley	Obesity	1930-7381, 1930-739X	Are obesity risk genes associated with binge eating in adolescence?	1500	TRUE			FALSE	cc-by	epmc_xml	hybrid	TRUE	Wellcome Trust			76467
PMC4463762	25366342	10.1111/apa.12850	Wiley	Acta Paediatrica	0803-5253, 1651-2227	Assessing pubertal status in multi-ethnic primary school children	1500	TRUE			FALSE	cc-by	epmc_xml	hybrid	TRUE	Wellcome Trust			WT094129MA
PMC4337679	25311087	10.1111/cei.12470	Wiley	Clinical and Experimental Immunology	0009-9104, 1365-2249	Defective natural killer cell anti-viral capacity in paediatric HBV infection	1500	TRUE			FALSE	cc-by	epmc_xml	hybrid	TRUE	Wellcome Trust	MRC
PMC4413047	25620686	10.1111/febs.13208	Wiley	FEBS Journal	1742-464X, 1742-4658	'Dopamine-first' Mechanism Enables Rational Engineering of Norcoclaurine Synthase (NCS) Aldehyde Activity Profile	1500	TRUE			FALSE	cc-by	epmc_xml	hybrid	TRUE	Wellcome Trust	BBSRC		096626/Z/11/Z	BB/G014426/1
PMC4345424	25572799	10.1111/tid.12325	Wiley	Transplant Infectious Diseases	1398-2273, 1399-3062	Effects of donor/recipient human leukocyte antigen mismatch on human cytomegalovirus replication following liver transplantation	1500	TRUE			FALSE	cc-by	epmc_xml	hybrid	TRUE	Wellcome Trust			1711105
PMC4463764	25645144	10.1002/oby.20997	Wiley	Obesity	1930-7381, 1930-739X	Ethnic differences in associations between fat deposition and incident diabetes, and underlying mechanisms: the SABRE study	1500	TRUE			FALSE	cc-by	epmc_xml	hybrid	TRUE	British Heart Foundation / Wellcome Trust	MRC		SP/07/001/23603	SP/07/001/23603
PMC4463763	25358870	10.1111/apa.12848	Wiley	Acta Paediatrica	0803-5253, 1651-2227	Functional magnetic resonance imaging can be used to explore tactile and nociceptive processing in the infant brain	1500	TRUE			FALSE	cc-by	epmc_xml	hybrid	TRUE	Wellcome Trust	MRC		090245/Z/09/Z	MR/M006468/1
PMC4402026	25773639	10.1111/nyas.12620	Wiley	Annals of the New York Academy of Sciences	0077-8923, 1749-6632	Functional MRI of music emotion processing in frontotemporal dementia	1500	TRUE			FALSE	cc-by	epmc_xml	hybrid	TRUE	Wellcome Trust			091673/Z/10/Z
PMC4361051	25522302	10.1002/oby.20958	Wiley	Obesity	1930-7381, 1930-739X	Genetic susceptibility testing and readiness to control weight: Results from a randomized controlled trial in university students	1500	TRUE			FALSE	cc-by	epmc_xml	hybrid	TRUE	Cancer Research UK			C1418/A10843
PMC4670473	25522098	10.1002/nbm.3251	Wiley	NMR in Biomedicine	0952-3480, 1099-1492	Hepatic arterial spin labelling MRI: an initial evaluation in mice	1500	TRUE			FALSE	cc-by	epmc_xml	hybrid	TRUE	Wellcome Trust / Cancer Research UK	EPSRC		WT100247MA, C1519/A10331	C1519/A10331
PMC4403968	25802212	10.1002/nbm.3269	Wiley	NMR in Biomedicine	0952-3480, 1099-1492	Multi-centre reproducibility of diffusion MRI parameters for clinical sequences in the brain	1500	TRUE			FALSE	cc-by	epmc_xml	hybrid	TRUE	Cancer Research UK			C7809/A10342
PMC4401999	25773640	10.1111/nyas.12616	Wiley	Annals of the New York Academy of Sciences	0077-8923, 1749-6632	Musical Tasks Targeting Preserved and Impaired Functions in Two Dementias	1500	TRUE			FALSE	cc-by	epmc_xml	hybrid	TRUE	Wellcome Trust			091673/Z/10/Z
PMC4309495	25327839	10.1002/glia.22759	Wiley	Glia	0894-1491, 1098-1136	Nitric oxide targets oligodendrocytes and promotes their morphological differentiation	1500	TRUE			FALSE	cc-by	epmc_xml	hybrid	TRUE	Wellcome Trust			081512/Z/06/Z
PMC4409084	25469631	10.1111/aji.12341	Wiley	American Journal of Reproductive Immunology	1046-7408, 1600-0897	Purified IgG from Patients with Obstetric but not IgG from Non-Obstetric Antiphospholipid Syndrome Inhibit Trophoblast Invasion	1500	TRUE			FALSE	cc-by	epmc_xml	hybrid	TRUE	Arthritis Research UK			19423
PMC4386982	25393318	10.1111/bph.13013	Wiley	British Journal of Pharmacology	0007-1188, 1476-5381	The role of the MPTP in conditioning the heart translatability and mechanism	1500	TRUE			FALSE	cc-by	epmc_xml	hybrid	TRUE	British Heart Foundation
PMC4263881	25342751	10.1074/jbc.M114.606772	American Society for Biochemistry and Molecular Biology, Inc.	Journal of Biological Chemistry	0021-9258, 1083-351X	A Negatively-Charged Residue Stabilizes the Tropoelastin N-terminal Region for Elastic Fiber Assembly.	1501.24	TRUE			FALSE	cc-by	epmc_xml	hybrid	TRUE
PMC4275497	25488851	10.2196/jmir.3382	Journal of Medical Internet Research	Journal of Medical Internet Research	1439-4456, 1438-8871	Non-probability web surveys to measure sexual behaviours and attitudes in the general population: a comparison with a probability sample interview survey	1501.36	TRUE			FALSE	cc-by	epmc_xml	oa	TRUE	Wellcome Trust	MRC		NATSAL	NATSAL
PMC4536938	25667952	10.1080/00224499.2014.985813	Taylor & Francis	Journal of Sex Research	0022-4499, 1559-8519	The Natsal-SF measure of sexual function: Comparison of three scoring methods	1501.92	TRUE			FALSE	cc-by	epmc_xml	hybrid	TRUE	Wellcome Trust	MRC			G0701757
PMC4315118	25691884	10.3389/fimmu.2015.00026	Frontiers	Frontiers in Immunology	1664-3224	Known allergen structures predict Schistosoma mansoni IgE-binding antigens in human infection	1502.46	TRUE			FALSE	cc-by	epmc_xml	oa	TRUE	0	0	0	0	0	0
PMC4445808	25994228	10.1186/s12933-015-0224-1	BioMed Central	Cardiovascular Diabetology	1475-2840	Longitudinal association of C-reactive protein and Haemoglobin A1c over 13Â years: the European Prospective Investigation into Cancer - Norfolk study	1503.3	TRUE			FALSE	cc-by	epmc_xml	oa	TRUE	0	0	0	0	0	0
PMC4603249	26528117	10.3389/fnins.2015.00366	Frontiers	Frontiers in Neuroscience	1662-4548, 1662-453X	Estimating multivariate similarity between neuroimaging datasets with sparse canonical correlation analysis: an application to perfusion imaging	1503.45	TRUE			FALSE	cc-by	epmc_xml	oa	TRUE	Wellcome Trust			WT088641/Z/09/Z
PMC4363371	25781320	10.1371/journal.pntd.0003620	PLOS	PLOS Neglected Tropical Diseases	1935-2727, 1935-2735	Distribution of Lutzomyia longipalpis chemotype populations in Sao Paulo State Brazil	1504.04	TRUE			FALSE	cc-by	epmc_xml	oa	TRUE	Wellcome Trust
PMC4563029	26413468	10.1016/j.molmet.2015.06.007	Elsevier	Molecular Metabolism	2212-8778	Limited impact on glucose homeostasis of leptin receptor deletion from insulin- or proglucagon-expressing cells	1506	TRUE			FALSE	cc-by	epmc_xml	oa	TRUE	WT			098424/Z/12/Z
PMC4247625	25413569	10.1186/s13071-014-0511-9		Parasites & vectors	1756-3305	Onchocerciasis transmission in Ghana: biting and parous rates of host-seeking sibling species of the Simulium damnosum complex	1506	TRUE			FALSE	cc-by	epmc_xml	oa	TRUE	Wellcome Trust			085133/Z/08/Z; 092677/Z/10/Z
PMC4297449	25561160	10.1186/s13071-014-0608-1	Parasites and Vectors	BioMed Central	1756-3305	Sm16, a major component of Schistosoma mansoni cercarial excretory/secretory products, prevents macrophage classical activation and delays antigen processing	1506	TRUE			FALSE	cc-by	epmc_xml	oa	TRUE	Wellcome Trust	0	0	092745/Z/10/Z	0	0
PMC4194349	24841985	10.1016/j.cortex.2014.03.010	Elsevier	Cortex	0010-9452, 1973-8102	(Con)text-specific effects of visual dysfunction on reading in posterior cortical atrophy	1507.29	TRUE			FALSE	cc-by	publisher	hybrid	TRUE	Wellcome Trust			091673/Z/10/Z
PMC4395405	25875298	10.1371/journal.pntd.0003707	PLOS	PLOS Neglected Tropical Diseases	1935-2727, 1935-2735	Trypanosoma cruzi vitamin C dependent peroxidase confers protection against oxidative stress but is not a determinant of virulence.	1508.95	TRUE			FALSE	cc-by	epmc_xml	oa	TRUE	Wellcome Trust			WT084175
PMC4456405	26042839	10.1371/journal.pntd.0003825	PLOS	PLoS Neglected Tropical Diseases	1935-2727, 1935-2735	Human Immunodeficiency Virus, Antiretroviral Therapy and Markers of Lymphatic Filariasis Infection: A Cross-sectional Study in Rural Northern Malawi	1509.33	TRUE			FALSE	cc-by	epmc_xml	oa	TRUE	Wellcome Trust			WT079828/Z/06/Z
PMC4400070	25881058	10.1371/journal.pntd.0003709	PLOS	PLoS Neglected Tropical Diseases	1935-2727, 1935-2735	Estimating the Global Burden of Endemic Canine Rabies	1510.98	TRUE			FALSE	cc0	epmc_xml	oa	TRUE	Wellcome Trust			095787/Z/11/Z)
PMC4400075	25881126	10.1371/journal.pntd.0003714	PLOS	PLoS Neglected Tropical Diseases	1935-2727, 1935-2735	Intravital Imaging of a Massive Lymphocyte Response in the Cortical Dura of Mice after Peripheral Infection by Trypanosomes.	1510.98	TRUE			FALSE	cc-by	epmc_xml	oa	TRUE	Wellcome Trust			85349
PMC4358968	25768648	10.1371/journal.pntd.0003552	PLOS	PLOS Neglected Tropical Diseases	1935-2727, 1935-2735	Lipid-free Antigen B Subunits from Echinococcus granulosus: Oligomerization, ligand binding, and membrane interaction properties	1510.98	TRUE			FALSE	cc-by	epmc_xml	oa	TRUE	Wellcome Trust			WT083625MA
PMC4361558	25775470	10.1371/journal.ppat.1004689	PLOS	PLoS Pathogens	1553-7366, 1553-7374	Probing the metabolic network in bloodstream-form Trypanosoma brucei using untargeted metabolomics with stable isotope labelled glucose	1510.98	TRUE			FALSE	cc-by	epmc_xml	oa	TRUE	Wellcome Trust			85349
PMC4227287	25426020	10.3389/fnmol.2014.00087	Frontiers	Frontiers in Molecular Neuroscience	1662-5099	Defining the nociceptor transcriptome	1511.27	TRUE			FALSE	cc-by	epmc_xml	oa	TRUE	Wellcome Trust			PNWRAQR
PMC4231679	25281748	10.1074/jbc.M114.594796	ASBMB	Journal of Biological Chemistry	0021-9258, 1083-351X	5-HT Cellular Sequestration During Chronic Exposure Delays 5- HT<SUB>3</SUB> Receptor Resensitization Due to its Subsequent Release	1519.02	TRUE			FALSE	cc-by	epmc_xml	hybrid	TRUE	Wellcome Trust				85141
PMC4261083	25460510	10.1016/j.ibmb.2014.10.002	Elsevier	Insect Biochemistry and Molecular Biology	0965-1748, 1879-0240	An atypical residue in the pore of the Varroa destructor GABA-activated RDL receptors affects picrotoxin block and thymol modulation Insect Biochemistry and Molecular Biology	1519.99	TRUE			FALSE	cc-by	publisher	hybrid	TRUE	0	0	0	0	0	0
PMC4220016	25174552	10.1016/j.neuropharm.2014.08.008	Elsevier	Neuropharmacology	0028-3908, 1873-7064	The binding characteristics and orientation of a novel radioligand with distinct properties at 5-HT3A and 5-HT3AB receptors	1519.99	TRUE			FALSE	cc-by	publisher	hybrid	TRUE	0	0	0	0	0	0
PMC4349457	0	10.1371/journal.pgen.1004986	PLOS	PLoS Genetics	1553-7390, 1553-7404	Sequence features and transcriptional stalling within centromere DNA promote establishment of CENP-A	1520.39	TRUE			FALSE	cc-by	epmc_xml	oa	TRUE	Wellcome Trust	0	0	095021,
PMC4228103	25376485	10.1186/s12939-014-0107-1	BioMed Central	International Journal for Equity in Health	1475-9276	The prevalence and determinants of catastrophic health expenditures attributable to non-communicable diseases in low- and middle-income countries: a review-based commentary on the methodological challenges involved	1524	TRUE			FALSE	cc-by	epmc_xml	oa	TRUE	0	0	0	0	0	0
PMC4417196	25649682	10.1186/1476-069X-14-15	Biomed Central	Environmental Health	1476-069X	Lifestyle domains as determinants of wheeze prevalence in urban 1 and rural schoolchildren in Ecuador: cross sectional analysis	1524	TRUE			FALSE	cc-by	epmc_xml	oa	TRUE	WT
PMC4344752	25888840	10.1186/s12966-015-0174-8	BioMed Central	International Journal of Behavioral Nutrition and Physical Activity	1479-5868	Employersâ€™ views of promoting walking to work: a qualitative study	1524.9	TRUE			FALSE	cc-by	epmc_xml	oa	TRUE	ESRC	Wellcome Trust	MRC	RES-590-28-0005	WT087640MA
PMC4391111	25888805	10.1186/s12966-015-0204-6	BioMed Central	International Journal of Behavioral Nutrition and Physical Activity	1479-5868	Longitudinal Changes in Sedentary Time and Physical Activity during Adolescence	1524.9	TRUE			FALSE	cc-by	epmc_xml	oa	TRUE	MRC	Wellcome Trust	ESRC	MR/KO232331/1
PMC4330926	25885800	10.1186/s12966-015-0167-7	BioMed Central	International Journal of Behavioral Nutrition and Physical Activity	1479-5868	Obesity prevention and the Health Promoting Schools framework: Essential components and barriers to success	1524.9	TRUE			FALSE	cc-by	epmc_xml	oa	TRUE	ESRC	Wellcome Trust	MRC	MR/KO232331/1
PMC4149242	25927293	10.1186/s12966-014-0102-3	BioMed Central	International Journal of Behavioral Nutrition and Physical Activity	1479-5868	Sociodemographic, behavioural and health factors associated with changes in older adults: TV viewing over 2Â years	1524.9	TRUE			FALSE	cc-by	epmc_xml	oa	TRUE	British Heart Foundation / Cancer Research UK / Wellcome Trust	MRC / ESRC		MR/J000396/1	MR/J000396/1
PMC4359624	0	10.1002/stem.1887	Wiley	Stem Cells	1066-5099, 1549-4918	Assisted reproductive techniques to prevent transmission of mitochondrial DNA	1526.42	TRUE			FALSE	cc-by	epmc_xml	hybrid	TRUE	Wellcome Trust	0	0	096919/Z/11/Z	0	0
PMC4515083	25899172	10.1002/cmdc.201500014	Wiley	ChemMedChem	1860-7179, 1860-7187	Selective Targeting of the TPX2 Site of Importin-? Using Fragment-Based Ligand Design	1528.55	TRUE			FALSE	cc-by	epmc_xml	hybrid	TRUE	0	0	0	0	0	0
PMC4340400	25404741	10.1074/jbc.M114.602615	ASBMB	Journal of Biological Chemistry	0021-9258, 1083-351X	Syntaxin 8 Regulates Platelet Dense Granule Secretion, Aggregation and Thrombus Stability	1528.67	TRUE			FALSE	cc-by	epmc_xml	hybrid	TRUE	British Heart Foundation			RJ5362
PMC4298656	25527430	10.1016/j.cortex.2014.10.023	Elsevier	Cortex	0010-9452, 1973-8102	The white matter of the human cerebrum: part I The occipital lobe by Heinrich Sachs	1529.31	TRUE			FALSE	cc-by	epmc_xml	hybrid	TRUE	Wellcome Trust			103759/Z/14/Z
PMC4517125	26184282	10.3390/v7072796	MDPI	Viruses	1999-4915	Cloned defective interfering influenza RNA and a possible pan-specific treatment of respiratory virus diseases	1529.5	TRUE			FALSE	cc-by	epmc_xml	oa	TRUE	Wellcome Trust			090441Z09Z
PMC4377062	25888775	10.1186/s13071-015-0797-2	BioMed Central	Parasites and Vectors	1756-3305	Contrasting patterns of insecticide resistance and knockdown resistance (kdr) in the dengue vectors Aedes aegypti and Aedes albopictus from Malaysia	1530	TRUE			FALSE	cc-by	epmc_xml	oa	TRUE	Wellcome Trust			WT083515/Z/07/Z
PMC4632607	0	10.1098/rstb.2015.0031	Royal Society	Philosophical Transactions B	0962-8436, 1471-2970	Activities and regulation of peptidoglycan synthases	1530	TRUE			FALSE	cc-by	epmc_xml	hybrid	TRUE	Wellcome Trust	0	0	101824/Z/13/Z	0	0
PMC4429494	25815624	10.1021/acs.biomac.5b00190	American Chemical Society	Biomacromolecules	1525-7797, 1526-4602	Investigating the Mechanisms of Amylolysis of Starch Granules by Solution-State NMR	1530.32	TRUE			FALSE	cc-by	epmc_xml	hybrid	TRUE	BBSRC	Wellcome Trust		BBS/S/N/2003/10574
PMC4539592	25755090	10.1002/cphc.201402794	Wiley	ChemPhysChem	1439-4235, 1439-7641	Spectral imaging to measure heterogeneity in membrane lipid packing.	1530.34	TRUE			FALSE	cc-by	epmc_xml	hybrid	TRUE	Wellcome Trust				091911/Z/10/A
PMC4276880	25326384	10.1074/jbc.M114.612630	American Society for Biochemistry and Molecular Biology	Journal of Biological Chemistry	0021-9258, 1083-351X	Identification of a novel recycling sequence in the C-tail of FPR2/ALX: association with cell protection from apoptosis	1531.01	TRUE			FALSE	cc-by	epmc_xml	hybrid	TRUE	Wellcome Trust			08667/Z/08/Z
PMC4454779	25882915	10.1016/j.tics.2015.04.001	Elsevier	Trends in Cognitive Sciences	1364-6613, 1879-307X	Distorting the metric fabric of the cognitive map	1533	TRUE			FALSE	cc-by	epmc_xml	hybrid	TRUE	Wellcome Trust	BBSRC / MRC		WT103896AIA	BB/J009792/1, G1100669
PMC4509518	25981318	10.1016/j.tcb.2015.05.001	Elsevier	Trends in Cell Biology	0962-8924, 1879-3088	Forcing contact inhibition of locomotion	1533	TRUE			FALSE	cc-by	epmc_xml	hybrid	TRUE	Wellcome Trust	MRC / BBSRC			BB/M008517;JMR/000655;MR/M010465
PMC4346263	25730310	10.1371/journal.pntd.0003518	PLOS	PNTD	1935-2727, 1935-2735	Arsenic Exposure and Outcomes of Antimonial Treatment in Visceral Leishmaniasis Patients in Bihar, India: A Retrospective Cohort Study	1533.32	TRUE			FALSE	cc-by	epmc_xml	oa	TRUE	Wellcome Trust				79838	90655
PMC4504028	26047304	10.1016/j.jad.2015.05.030	Elsevier	Journal of Affective Disorders	0165-0327, 1573-2517	Exposure to socioeconomic adversity in early life and risk of depression at 18 years: the mediating role of locus of control	1533.48	TRUE			FALSE	cc-by	epmc_xml	hybrid	TRUE	Wellcome Trust	MRC		WT102215/2/13/2
PMC4550475	26150198	10.1016/j.jad.2015.06.001	Elsevier	Journal of Affective Disorders	0165-0327, 1573-2517	Exposure to, and searching for, information about suicide and self-harm on the Internet: prevalence and predictors in a population based cohort of young adults	1533.48	TRUE			FALSE	cc-by	epmc_xml	hybrid	TRUE	Wellcome Trust	MRC		WT092731
PMC4411216	25901775	10.1016/j.jaac.2015.02.006	Elsevier	Journal of the American Academy of Child and Adolescent Psychiatry	0890-8567, 1527-5418	Pathways to Suicide-Related Behavior in Offspring of Mothers With Depression: The Role of Offspring Psychopathology	1533.48	TRUE			FALSE	cc-by	epmc_xml	hybrid	TRUE	Wellcome Trust	MRC		WT092731	WT097822/Z/11/ZR
PMC4291150	25445704	10.1016/j.freeradbiomed.2014.11.003	Elsevier	Free Radical Biology and Medicine	0891-5849, 1873-4596	Brusatol Provokes a Rapid and Transient Inhibition of Nrf2 Signalling and Sensitizes Mammalian Cells to Chemical Toxicity â€“ Implications for Therapeutic Targeting of Nrf2	1533.65	TRUE			FALSE	cc-by	epmc_xml	hybrid	TRUE	Wellcome Trust			094128/Z/10/Z
PMC4507333	26089302	10.1093/humrep/dev143	Oxford University Press	Human Reproduction	0268-1161, 1460-2350	Direct comparison of the effects of intravenous kisspeptin-10, kisspeptin-54 and GnRH on gonadotrophin secretion in healthy men	1533.9	TRUE			FALSE	cc-by	epmc_xml	hybrid	TRUE	WT			098254/Z/12/Z -095112/Z/10/Z
PMC4317193	25282058	10.1016/j.cortex.2014.08.017	Elsevier	Cortex	0010-9452, 1973-8102	Impaired threat prioritisation after selective bilateral amygdala lesions	1535.48	TRUE			FALSE	cc-by	epmc_xml	hybrid	TRUE	Wellcome Trust			091593/Z/10/Z
PMC4312132	25238029	10.1021/bi5008035	ACS	Biochemistry	0006-2960, 1520-4995	Phenylalanine in the Pore of the Erwinia Ligand-Gated Ion Channel Modulates Picrotoxinin Potency but Not Receptor Function	1535.81	TRUE			FALSE	cc-by	epmc_xml	hybrid	TRUE	0	0	0	0	0	0
PMC4583782	25447755	10.1002/stem.1910	Wiley	Stem Cells	1066-5099, 1549-4918	Genetically Induced Cell Death in Bulge Stem Cells Reveals Their Redundancy for Hair and Epidermal Regeneration	1535.81	TRUE			FALSE	cc-by	epmc_xml	hybrid	TRUE	0	0	0	0	0	0
PMC4259517	25158312	10.1016/j.neuropharm.2014.08.010	Elsevier	Neuropharmacology	0028-3908, 1873-7064	The role of group II metabotropic glutamate receptors in cognition and anxiety: comparative studies in GRM2(-/-), GRM3 (-/-) and GRM2/3(-/-) knockout mice	1537.69	TRUE			FALSE	cc-by	publisher	hybrid	TRUE	Wellcome Trust				87736
PMC4571871	26178371	10.1074/jbc.M115.645291	American Society for Biochemistry and Molecular Biology	Journal of Biological Chemistry	0021-9258, 1083-351X	The zinc transporter Slc30a8/ZnT8 is required in a subpopulation of pancreatic ? cells for hypoglycemia-induced glucagon secretion	1537.96	TRUE			FALSE	cc-by	epmc_xml	hybrid	TRUE	WT			098424/Z/12/Z
PMC4353684	25483398	10.1016/j.expneurol.2014.11.013	Elsevier	Experimental Neurology	0014-4886, 1090-2430	Perineuronal net digestion with chondroitinase restores memory in mice with tau pathology	1538.12	TRUE			FALSE	cc-by	epmc_xml	hybrid	TRUE	0	0	0	0	0	0
PMC4526978	26149323	10.2196/jmir.4420	Journal of Medical Internet Research	Journal of Medical Internet Research	1439-4456, 1438-8871	Prevalence and Frequency of mHealth and eHealth Use Among Smokers in the US and UK and Differences by Motivation to Quit	1538.21	TRUE			FALSE	cc-by	epmc_xml	oa	TRUE
PMC4358009	25714712	10.1128/mBio.02383-14	American Society for Microbiology	mBio	2150-7511	High-throughput analysis of gene essentiality and sporulation in Clostridium difficile	1539.14	TRUE			FALSE	cc-by	epmc_xml	oa	TRUE	WT			98051, 089875/Z/09/A *Not at Imperial?
PMC4229501	25128710	10.1016/j.neuroimage.2014.08.015	Elsevier	NeuroImage	1053-8119, 1095-9572	The influence of stimulus format on drawing - a functional imaging study of decision making in portrait drawing	1539.53	TRUE			FALSE	cc-by	publisher	hybrid	TRUE	Wellcome Trust	0	0	WT 087554 (RCHX14142)	0	0
PMC4483224	26104972	10.1186/s13023-015-0292-z	Biomed Central	Orphanet Journal Of Rare Diseases	1750-1172	Diffuse left ventricular interstitial fibrosis is associated with sub-clinical myocardial dysfunction in AlstrÃ¶m Syndrome: An Observational Study	1540.2	TRUE			FALSE	cc-by	epmc_xml	oa	TRUE	British Heart Foundation	0	0	FS/11/1728700	0	0
PMC4583779	25377420	10.1002/stem.1889	Wiley	Stem Cells	1066-5099, 1549-4918	Acute Loss of Cited2 Impairs Nanog Expression and Decreases Self-Renewal of Mouse Embryonic Stem Cells	1541.03	TRUE			FALSE	cc-by	epmc_xml	hybrid	TRUE	0	0	0	0	0	0
PMC4629103	26634223	10.1016/j.dadm.2015.02.003	Elsevier	Alzheimer's & Dementia: Diagnosis, Assessment & Disease Monitoring	2352-8729	Physiological phenotyping of dementias using emotional sounds	1543.01	TRUE			FALSE	cc-by	epmc_xml	hybrid	TRUE	Wellcome Trust	MRC		091673/Z/10/Z	MR/J011274/1
PMC4370749	0	10.1371/journal.pntd.0003627	PLOS	PLOS Neglected Tropical Diseases	1935-2727, 1935-2735	Group 2 Innate lymphoid cell proportions are diminished in young helminth infected children and restored by curative anti-helminthic treatment	1543.74	TRUE			FALSE	cc-by	epmc_xml	oa	TRUE	Wellcome Trust	0	0	095831/Z/11/Z
PMC4591398	26163442	10.1152/ajpheart.00152.2015	APA (American Psychological Association)	American Journal of Physiology, Heart and Circulatory Physiology	0363-6135, 1522-1539	Non-invasive calculation of the aortic blood pressure waveform from the flow velocity waveform: a proof of concept	1544	TRUE			FALSE	cc-by	epmc_xml	hybrid	TRUE	British Heart Foundation			RE/08/003
PMC4372120	25244105	10.1021/ci500245d	American Chemical Society	Journal of Chemical Information and Modeling	1549-9596, 1549-960X	OOMMPPAA: A Tool To Aid Directed Synthesis by the Combined Analysis of Activity and Structural Data	1544.41	TRUE			FALSE	cc-by	epmc_xml	hybrid	TRUE	Wellcome Trust				092809/Z/10/Z
PMC4291465	25452419	10.1534/g3.114.014415	Genetics Society of America	G3: Genes, Genomes, Genetics	2160-1836	Parallel Profiling of Fission Yeast Deletion Mutants for Proliferation and for Lifespan During Long-Term Quiescence	1545.28	TRUE			FALSE	cc-by	epmc_xml	oa	TRUE	Wellcome Trust	BBSRC		095598/Z/11/Z	BB/I012451/1
PMC3997818	24694212	10.1186/1741-7015-12-57	BioMed Central	BMC Medicine	1741-7015	The intergenerational effects of war on the health of children	1545.3	TRUE			FALSE	cc-by	epmc_xml	oa	TRUE	Wellcome Trust			092121, 091561
PMC4581463	26010437	10.1002/cbic.201500185	Wiley	ChemBioChem	1439-4227, 1439-7633	A Versatile Strategy for the Semisynthetic Production of Ser65 Phosphorylated Ubiquitin and Its Biochemical and Structural Characterisation	1546.67	TRUE			FALSE	cc-by	epmc_xml	hybrid	TRUE	Wellcome Trust				101022/Z/13/Z
PMC4380362	0	10.1371/journal.pgen.1005107	PLOS	PLoS Genetics	1553-7390, 1553-7404	Network Analyses reveal novel aspects of ALS pathogenesis	1546.86	TRUE			FALSE	cc-by	epmc_xml	oa	TRUE	Wellcome Trust	0	0	086552,
PMC4609345	26504782	10.1155/2015/165074	Hindawi	Biomed Research International	2314-6133, 2314-6141	Social cognitive mediators of sociodemographic differences in colorectal cancer screening uptake	1547.05	TRUE			FALSE	cc-by	epmc_xml	oa	TRUE	Cancer Research UK			C1418/A14134
PMC4445817	26019868	10.1186/s40337-015-0057-z	BioMed Central	Journal of Eating Disorders	2050-2974	Time to restore body weight in adults and adolescents receiving cognitive behaviour therapy for anorexia nervosa	1548	TRUE			FALSE	cc-by	epmc_xml	oa	TRUE	Wellcome Trust				94585
PMC4245719	25310878	10.1016/j.jmr.2014.09.010	Elsevier	Journal of Magnetic Resonance	1090-7807, 1096-0856	The spatial effect of protein deuteration on nitroxide spin-label relaxation: Implications for EPR distance measurement.	1549.72	TRUE			FALSE	cc-by	publisher	hybrid	TRUE	Wellcome Trust				95062
PMC4389832	25659464	10.1016/j.neuroimage.2015.01.052	Elsevier	Neuroimage	1053-8119, 1095-9572	Sensitivity to the temporal structure of rapid sound sequences â€“ an MEG study	1551.88	TRUE			FALSE	cc-by	epmc_xml	hybrid	TRUE	Wellcome Trust			093292/Z/10/Z
PMC4634624	26629528	10.1016/j.ebiom.2015.08.037	Elsevier	EBioMedicine	2352-3964	Osteoprotegerin (OPG), the endogenous inhibitor of Receptor Activator of NF-B Ligand (RANKL), is dysregulated in BRCA mutation carriers	1552	TRUE			FALSE	cc-by	epmc_xml	oa	TRUE	Cancer Research UK	MRC		C315/A2621 and C1005/A6383	MRC8804/A/A7058
PMC4528144	26105053	10.1074/jbc.M115.641415	ASBMB	Journal of Biological Chemistry	0021-9258, 1083-351X	Dickkopf Homolog 3 Induces Stem Cell Differentiation into Smooth Muscle Lineage via ATF6 Signalling	1552.58	TRUE			FALSE	cc-by	epmc_xml	hybrid	TRUE	British Heart Foundation			MKJWQBR
PMC4363412	0	10.1128/IAI.02831-14	American Society of Microbiology	Infection and Immunity	0019-9567, 1098-5522	CD4+ T cell hypo-responsiveness after repeated exposure to Schistosoma mansoni larvae is dependent upon interleukin-10	1553.02	TRUE			FALSE	cc-by	epmc_xml	hybrid	TRUE	Wellcome Trust	0	0	092745/Z/10/Z	0	0
PMC4347340	25487730	10.4269/ajtmh.14-0435	Sheridan	American Journal of Tropical Medicine and Hygiene	0002-9637, 1476-1645	Factors Associated with the Performance and Cost-Effectiveness of Using Lymphatic Filariasis Transmission Assessment Surveys for Monitoring Soil-Transmitted Helminths: A Case Study in Kenya	1554.53	TRUE			FALSE	cc-by	epmc_xml	hybrid	TRUE	Wellcome Trust			WT098045
PMC4387294	25831125	10.2196/jmir.3082	Journal of Medical Internet Research	Journal of Medical Internet Research	1439-4456, 1438-8871	Systems Medicine 2.0: potential benefits of combining electronic healthcare records with systems science models	1557.55	TRUE			FALSE	cc-by	epmc_xml	oa	TRUE	Wellcome Trust			097821/Z/11/A
PMC4231975	25452746	10.3389/fmicb.2014.00599	Frontiers	Frontiers in Microbiology	1664-302X	Temperature dependent bacteriophages of a tropical bacterial pathogen	1559.69	TRUE			FALSE	cc-by	epmc_xml	oa	TRUE	Wellcome Trust	0	0	Isolation and characterisation of lytic bacteriophages which infect Burkholderia pseudomallei Grant number 092638/Z/10/Z	0	0
PMC4432062	25832298	10.1128/JCM.02778-14	American Society of Microbiology	Journal for Clinical Microbiology	0095-1137, 1098-660X	Evidence for Human Norovirus Infection of Dogs in the United Kingdom	1560.17	TRUE			FALSE	cc-by	epmc_xml	hybrid	TRUE	0	0	0	0	0	0
PMC4539354	0	10.1007/s00415-015-7772-x	Springer	Journal of Neurology	0340-5354, 1432-1459	Frequency of rare recessive mutations in unexplained late onset cerebellar ataxia	1563.5	TRUE			FALSE	cc-by	epmc_xml	hybrid	TRUE	Wellcome Trust	0	0	101876/Z/13/Z	0	0
PMC4371795	25660056	10.1016/j.jtbi.2015.01.031	Elsevier	Journal of Theoretical Biology	0022-5193, 1095-8541	A cost minimisation and Bayesian inference model predicts startle reflex modulation across species	1564.87	TRUE			FALSE	cc-by	epmc_xml	hybrid	TRUE	Wellcome Trust			091593/Z/10/Z
PMC4481424	26137440	10.1016/j.molmet.2015.04.005	Elsevier	Molecular Metabolism	2212-8778	Peroxisome proliferator-activated receptor alpha plays a crucial role in behavioral repetition and cognitive flexibility in mice	1565.13	TRUE			FALSE	cc-by	epmc_xml	oa	TRUE	Wellcome Trust	0	0	WT098012	0	0
PMC4505687	25951416	10.1021/acschemneuro.5b00080	ACS	ACS Chemical Neuroscience	1948-7193	5-HT3 Receptor Brain-Type B-Subunits are Differentially Expressed in Heterologous Systems	1565.76	TRUE			FALSE	cc-by	epmc_xml	hybrid	TRUE	0	0	0	0	0	0
PMC4464304	25648377	10.1016/j.brs.2014.12.004	Elsevier	Brain Stimulation	1935-861X	Alpha power increase after transcranial alternating current stimulation at alphafrequency (?-tACS) reflects plastic changes rather than entrainment	1566.71	TRUE			FALSE	cc-by	epmc_xml	hybrid	TRUE	Wellcome Trust	Wellcome Trust		WT098434	WT098433
PMC4505252	26055379	10.1128/AAC.00263-15	American Society for Microbiology	Antimicrobial Agents and ChemotherapyÂ	0066-4804, 1098-6596	Calcium-mediated inducation of paraxoxical growth following caspofungin treatment is assoicated with calcineurin activation and phophorylation in Aspergillu fumigatus.	1567.43	TRUE			FALSE	cc-by	epmc_xml	hybrid	TRUE
PMC4403932	25703523	10.1021/jm501893k	American Chemical Society	Journal of Medicinal Chemistry	0022-2623, 1520-4804	9H-Purine Scaffold Reveals Induced-Fit Pocket Plasticity of the BRD9 Bromodomain	1568	TRUE			FALSE	cc-by	epmc_xml	hybrid	TRUE	Wellcome Trust				092809/Z/10/Z
PMC4473204	25926489	10.1128/JCM.03524-14	American Society for Mircrobiology	Journal of Clinical Microbiology	0095-1137, 1098-660X	Genome-Based Characterization of Emergent Invasive Neisseria meningitidis Serogroup Y Isolates in Sweden from 1995 to 2012	1568.1	TRUE			FALSE	cc-by	epmc_xml	hybrid	TRUE	Wellcome Trust				087622/Z/08/Z
PMC4539360	0	10.1007/s00415-015-7778-4	Springer	Journal of Neurology	0340-5354, 1432-1459	Genotype/phenotype correclations in AARS-related neuropathy in cohort of patients from the United Kingdom and Ireland	1568.97	TRUE			FALSE	cc-by	epmc_xml	hybrid	TRUE	Wellcome Trust	0	0	101876/Z/13/Z	0	0
PMC4505408	25979343	10.1074/jbc.M114.622928	American Society for Biochemistry and Molecular Biology (ASBMB)	Journal of Biological Chemistry	0021-9258, 1083-351X	Probing the Solution Structure of I&[kappa]B Kinase (IKK) Subunit &[gamma] and its Interaction with Kaposi&[prime]s Sarcoma Associated Herpes Virus Flice Interacting Protein and IKK Subunit &[beta] by EPR Spectroscopy	1569.01	TRUE			FALSE	cc-by	epmc_xml	hybrid	TRUE	Cancer Research UK / Wellcome Trust	MRC		A12595	ID18218
PMC4505066	26055705	10.1074/jbc.M115.661058	American Society for Biochemistry and Molecular Biology (ASBMB)	Journal of Biological Chemistry	0021-9258, 1083-351X	Insights into the recruitment of class IIa Histone Deacetylases (HDACs) to the SMRT/NCoR transcriptional repression complex	1569.6	TRUE			FALSE	cc-by	epmc_xml	hybrid	TRUE	Wellcome Trust	0	0	The molecular functioning of HDAC:co-repressor complexes WT085408, WT100237	0	0
PMC4274319	25453745	10.1016/j.bbr.2014.10.016	Elsevier	Behavioural Brain Research	0166-4328, 1872-7549	The impact of fornix lesions on spatial learning tasks sensitive to anterior thalamic & hippocampal damage	1571.13	TRUE			FALSE	cc-by	epmc_xml	hybrid	TRUE	Wellcome Trust			087855/Z/08/Z
PMC4495259	0	10.1007/s00439-015-1568-z	Springer	Human Genetics	0340-6717, 1432-1203	A Recessive homozygous p.Asp92Gly SDHD mutation causes prenatal cardiomyopathy and a severe mitochondrial complex II deficiency	1571.31	TRUE			FALSE	cc-by	epmc_xml	hybrid	TRUE	Wellcome Trust	0	0	096919/Z/11/Z	0	0
PMC4525080	25972452	10.1152/ajpcell.00079.2015	American Physiological Society	American Journal of Physiology Cell Physiology	0363-6143, 1522-1563	Defining the roles of arrestin2 and arrestin3 in vasoconstrictor receptor desensitization in hypertension	1572.26	TRUE			FALSE	cc-by	epmc_xml	hybrid	TRUE	British Heart Foundation	0	0	Investigating the causes and consequences of G-protein-coupled receptor kinase (GRK) and arrestin up-regulation in vascular smooth muscle in hypertension'. Grant code PG/11/60/29007 from the British Heart Foundation.	0	0
PMC4496624	26056388	10.1128/IAI.00255-15	American Society for Microbiology	Infection and Immunity	0019-9567, 1098-5522	Persistent Staphylococcus aureus isolates from two independent bacteraemia display increased in vivo bacterial fitness and immune evasion phenotypes	1573.67	TRUE			FALSE	cc-by	epmc_xml	hybrid	TRUE	Wellcome Trust	0	0	097828Z11Z Investigation of the microbial genetic basis of persistent Staphylococcus aureus infections	0	0
PMC4329992	25557602	10.1016/j.antiviral.2014.12.018	Elsevier	Antiviral Research	0166-3542, 1872-9096	Natural compounds isolated from Brazilian plants are potent inhibitors of hepatitis C virus replication in vitro	1576.68	TRUE			FALSE	cc-by	epmc_xml	hybrid	TRUE	Wellcome Trust	0	0	096670MA	0	0
PMC4317768	25542422	10.1016/j.neuroscience.2014.12.014	Elsevier	Neuroscience	0306-4522, 1873-7544	Disruption of medial prefrontal synchrony in the subchronic phencyclidine model of schizophrenia in rats	1576.88	TRUE			FALSE	cc-by	epmc_xml	hybrid	TRUE	Wellcome Trust	0	0	Effects of subchronic phencyclidine on activity in cortico-accumbal circuits 097828/Z/11/A	0	0
PMC4656712	0		Springer	Strahlentherapie und Onkologie	0179-7158, 1439-099X	Comparison of CT number (CTN) calibration techniques for CBCT-based dose calculation	1578	TRUE			FALSE	cc-by	epmc_xml	hybrid	TRUE	Cancer Research UK			0
PMC4312351	25111472	10.1016/j.neuroimage.2014.08.002	Elsevier	NeuroImage	1053-8119, 1095-9572	Guiding functional connectivity estimation by structural connectivity in MEG: an application to discrimination of conditions of mild cognitive impairment	1578.06	TRUE			FALSE	cc-by	publisher	hybrid	TRUE	Wellcome Trust				92753
PMC4304005	25532461	10.1016/j.pbb.2014.12.004	Elsevier	Pharmacology Biochemistry and Behavior	0091-3057, 1873-5177	Intraperitoneal setraline and fluvoxamine increase conditioned suppression to context but are without effect onovershadowing between cues.	1580.46	TRUE			FALSE	cc-by	publisher	hybrid	TRUE	Wellcome
PMC4437669	25971606	10.1186/s12966-015-0222-4	BioMed Central	International Journal of Behavioral Nutrition and Physical Activity	1479-5868	Magnitude and determinants of change in objectively-measured physical activity, sedentary time and sleep duration from ages 15 to 17.5y in UK adolescents: the ROOTS study	1584.9	TRUE			FALSE	cc-by	epmc_xml	oa	TRUE	0	0	0	0	0	0
PMC4340230	25889383	10.1186/s12966-015-0185-5	BioMed Central	International Journal of Behavioral Nutrition and Physical Activity	1479-5868	Mechanisms underpinning use of new walking and cycling infrastructure in different contexts: mixed-method analysis	1584.9	TRUE			FALSE	cc-by	epmc_xml	oa	TRUE	0	0	0	0	0	0
PMC4377032	25890259	10.1186/s12966-015-0202-8	BioMed Central	International Journal of Behavioral Nutrition and Physical Activity	1479-5868	The changing relationship between rainfall and childrenâ€™s physical activity in spring and summer: a longitudinal study	1584.9	TRUE			FALSE	cc-by	epmc_xml	oa	TRUE	0	0	0	0	0	0
PMC4334914	25630770	10.1186/s12964-015-0085-y	Biomed Central	Cell Communication and Signaling	1478-811X	The Rho GTPase RhoB regulates cadherin expression and epithelial cell-cell interaction	1584.9	TRUE			FALSE	cc-by	epmc_xml	oa	TRUE	Wellcome Trust			2008MayPR13
PMC4276847	25378395	10.1074/jbc.M114.586222	ASBMB	Journal of Biological Chemistry	0021-9258, 1083-351X	?2-Microglobulin Amyloid Fibrils Are Nanoparticles That Disrupt Lysosomal Membrane Protein Trafficking and Inhibit Protein Degradation by Lysosomes	1587.98	TRUE			FALSE	cc-by	epmc_xml	hybrid	TRUE	BBSRC	Wellcome Trust	0	BB/526502/1	092896/Z/10/Z	0
PMC4648043	26395087	10.1002/cmdc.201500301	Wiley	ChemMedChem	1860-7179, 1860-7187	Development of Small-Molecule Trypanosoma brucei N-Myristoyltransferase Inhibitors: Discovery and Optimisation of a Novel Binding Mode	1589.97	TRUE			FALSE	cc-by	epmc_xml	hybrid	TRUE	Wellcome Trust				77705	94090
PMC4648050	26381210	10.1002/cmdc.201500300	Wiley	ChemMedChem	1860-7179, 1860-7187	Discovery of Inhibitors of Trypanosoma brucei by Phenotypic Screening of a Focused Protein Kinase Library.	1589.97	TRUE			FALSE	cc-by	epmc_xml	hybrid	TRUE	Wellcome Trust				77705	83481
PMC4449558	26025096	10.1186/s13075-015-0639-9	BioMed Central	Arthritis Research & Therapy	1478-6354, 1478-6362	Yes-associated protein (YAP) is a negative regulator of chondrogenesis in mesenchymal stem cells	1590	TRUE			FALSE	cc-by	epmc_xml	oa	TRUE	Arthritis Research UK	0	0	19429	0	0
PMC4091740	24970045	10.1186/1471-2458-14-655	BioMed Central	BMC Public Health	1471-2458	Associations between objectively assessed child and parental physical activity:Â A cross-sectional study of families with 5-6 year old children	1590	TRUE			FALSE	cc-by	epmc_xml	oa	TRUE	British Heart Foundation			PG/11/51/28986
PMC4469326	0	10.1186/s12864-015-1667-1	BioMed Central	BMC Genomics	1471-2164	De novo assembly of the Carcinus maenas transcriptome and characterization of innate immune system pathways	1590	TRUE			FALSE	cc-by	epmc_xml	oa	TRUE	Wellcome Trust	0	0	WT097835MF	0	0
PMC4302442	0	10.1186/s12885-015-1012-8	Biomed Central	BMC Cancer	1471-2407	Androgen regulation of the protein tyrosine phosphates PTPRR activated ERK1/2 signalling in prostate	1590	TRUE			FALSE	cc-by	epmc_xml	oa	TRUE	Wellcome Trust	0	0	089225/Z/09/Z	0	0
PMC4301889	0	10.1186/1471-2156-15-1	Biomed Central	BMC Genetics	1471-2156	Chromosome 16q22 variants in a region associated with cardiovascular phonotypes correlate with ZFHX3 expression in a transcript-specific manner	1590	TRUE			FALSE	cc-by	epmc_xml	oa	TRUE	British Heart Foundation	0	0	FS/12/55/29695	0	0
PMC4377854	25523208	10.1186/1471-2164-15-1138	BioMed Central	BMC Genomics	1471-2164	A gene-by-gene population genomics platform: de novo assembly, annotation and genealogical analysis of 108 representative Neisseria meningitidis genomes	1590	TRUE			FALSE	cc-by	epmc_xml	oa	TRUE	Wellcome Trust				87622
PMC4301834	25526776	10.1186/1471-2407-14-983	BioMed Central	BMC Cancer	1471-2407	A phase II clinical trial of 6-mercaptopurine (6MP) and methotrexate in patients with BRCA defective tumours: a study protocol	1590	TRUE			FALSE	cc-by	epmc_xml	oa	TRUE	Cancer Research UK				C1488/A12447
PMC4265419	25466778	10.1186/s12879-014-0660-7	BioMed Central	BMC Infectious Diseases	1471-2334	Serum indoleamine 2,3-dioxygenase activity is associated with reduced immunogenicity following vaccination with MVA85A	1590	TRUE			FALSE	cc-by	epmc_xml	oa	TRUE	Wellcome Trust				95780
PMC4409211	25909750	10.1371/journal.pntd.0003748	PLOS	PLoS Neglected Tropical Diseases	1935-2727, 1935-2735	Rapid emergence of multidrug resistant, H58-lineage Salmonella typhi in Blantyre, Malawi	1590.59	TRUE			FALSE	cc-by	epmc_xml	oa	TRUE	Wellcome Trust			WT092152MA
PMC4505599	0	10.1074/jbc.M115.636704	American Society for Biochemistry and Molecular Biology	Journal of Biological Chemistry	0021-9258, 1083-351X	Structural Basis for the Inverted Repeat Preferences of mariner Transposases	1591.5	TRUE			FALSE	cc-by	epmc_xml	hybrid	TRUE	Wellcome Trust	0	0	085176/Z/08/Z
PMC4503877	0	10.1007/s00415-015-7755-y	Springer	Journal of Neurology	0340-5354, 1432-1459	Whole exome sequencing and the clinician: we need clinical skills and functional validation in variant filtering	1591.66	TRUE			FALSE	cc-by	epmc_xml	hybrid	TRUE	Wellcome Trust	0	0	101876/Z/13/Z	0	0
PMC4264479	25566206	10.3389/fmicb.2014.00686	Frontiers	Frontiers in Microbiology	1664-302X	Evaluating controlled human malaria Infection in Kenyan adults with varying degrees of prior exposure to Plasmodium falciparum using sporozoites administered by intramuscular injection	1594.77	TRUE			FALSE	cc-by	epmc_xml	oa	TRUE	Wellcome Trust				907940
PMC4333887	25890035	10.1186/s12936-015-0574-x	BioMed Central	Malaria Journal	1475-2875	Re-examining environmental correlates of Plasmodium falciparum malaria endemicity: a data- intensive variable selection approach	1596	TRUE			FALSE	cc-by	epmc_xml	oa	TRUE	Wellcome Trust				095066/Z/10/Z
PMC4572612	26380582	10.1186/s13072-015-0021-9	Biomed Central	Epigenetics and Chromatin	1756-8935	A coordinated epigenomic and transcriptional response to histone deacetylase inhibitors promotes cell survival	1596.3	TRUE			FALSE	cc-by	epmc_xml	oa	TRUE	Cancer Research UK	0	0	RCPV16151(DJAA)	0	0
PMC4464137	26054403	10.1186/s12966-015-0236-y	BioMed Central	International Journal of Behavioral Nutrition and Physical Activity	1479-5868	Prospective association between objective measures of childhood motor coordination and sedentary behaviour in adolescence and adulthood	1596.3	TRUE			FALSE	cc-by	epmc_xml	oa	TRUE	Cancer Research UK / British Heart Foundation			Abigail Fisher; Mark Hamer
PMC4583748	26410252	10.1186/s12966-015-0286-1	BioMed Central	International Journal of Behavioral Nutrition and Physical Activity	1479-5868	UK Preschool-aged children's physical activity levels in childcare and at home: a cross-sectional exploration	1596.3	TRUE			FALSE	cc-by	epmc_xml	oa	TRUE	Wellcome Trust / British Heart Foundation	MRC		CEDAR grant number: RES-590-28-0002	MC_UU_12015/7; MC_UU_12015/4
PMC4337517	25552726	10.1128/JVI.02995-14	ASM	Journal of Virology	0022-538X, 1098-5514	Serine Phosphorylation of the Hepatitis C Virus NS5A Protein Controls the Establishment of Replication Complexes	1597.55	TRUE			FALSE	cc-by	epmc_xml	hybrid	TRUE	Wellcome Trust	0	0	096670MA	0	0
PMC4303689	25505181	10.1074/jbc.M114.610527	American Society for Biochemistry and Molecular Biology (ASBMB)	Journal of Biological Chemistry	0021-9258, 1083-351X	The H50Q Mutation Induces a 10-fold Decrease in the Solubility of ?-Synuclein	1603.16	TRUE			FALSE	cc-by	epmc_xml	hybrid	TRUE	Wellcome Trust	MRC		097806/Z/11/Z	MR/K000187/1
PMC4687864	26139220	10.1152/japplphysiol.01014.2014	American Physiological Society	Journal of Applied Physiology	8750-7587, 1522-1601	Identification of mouse gaits using a novel force-sensing exercise wheel	1604.6	TRUE			FALSE	cc-by	epmc_xml	hybrid	TRUE
PMC4377829	25381387	10.1189/jlb.2A0614-282R	Society for Leukocyte Biology	Journal of Leukocyte Biology	0741-5400, 1938-3673	Decidual natural killer cell receptor expression is altered in pregnancies with impaired vascular remodelling and a higher risk of pre-eclampsia	1604.79	TRUE			FALSE	cc-by	epmc_xml	hybrid	TRUE	WT
PMC4428009	0	10.1021/acs.jpcb.5b00686	American Chemical Society	The Journal of Physical Chemistry Part B	1520-6106, 1520-5207	Improving the Hyperpolarization of 31P Nuclei by Synthetic Design	1605.24	TRUE			FALSE	cc-by	epmc_xml	hybrid	TRUE	Wellcome Trust	0	0	098352/Z/12/Z	0	0
PMC4286629	25462412	10.1016/j.jad.2014.11.003	Elsevier	Journal of Affective Disorders	0165-0327, 1573-2517	Self-reported school Experience as a Predictor of Self-Harm During Adolescence: A prospective cohort study in the South West of England (ALSPAC)	1605.93	TRUE			FALSE	cc-by	epmc_xml	hybrid	TRUE	Wellcome Trust	MRC		WT092731
PMC4195862	25286901	10.1186/s12917-014-0239-y	BioMed Central	BMC Veterinary Research	1746-6148	Prevalence of porcine cysticercosis in the Lake Kyoga Basin, Uga	1608	TRUE			FALSE	cc-by	epmc_xml	oa	TRUE	Wellcome Trust			085308/Z/08/Z
PMC4355134	25884318	10.1186/s12883-015-0273-9	BioMed Central	BMC Neurology	1471-2377	Clinical associations between gout and multiple sclerosis, Parkinson's disease and motor neuron disease: record-linkage studies	1608	TRUE			FALSE	cc-by	epmc_xml	oa	TRUE	Wellcome Trust				75491
PMC3485563	22820554	10.1016/j.neuropharm.2012.07.009	Elsevier	Neuropharmacology	0028-3908, 1873-7064	Effects of modafinil on non-verbal cognition, task enjoyment and creative thinking in healthy volunteers	1609.2	TRUE			FALSE	cc-by	epmc_xml	hybrid	TRUE	Wellcome
PMC4315046	25539423	10.1021/jp511492q	American Chemical Society	The Journal of Physical Chemistry	1520-6106, 1520-5207	Strategies for the Hyperpolarization of Acetonitrile and Related Ligands by SABRE	1609.28	TRUE			FALSE	cc-by	epmc_xml	hybrid	TRUE	Wellcome Trust	EPSRC	0	098335/Z/12/Z	EP/G009546/1	0
PMC4415441	25932320	10.1186/s13229-015-0018-z	BioMed Central	Molecular Autism	2040-2392	The Cambridge Mindreading Face-Voice Battery for Children (CAM-C): complex emotion recognition in children with and without autism spectrum conditions	1610.4	TRUE			FALSE	cc-by	epmc_xml	oa	TRUE	0	0	0	0	0	0
PMC4432814	25934499	10.1186/s13064-015-0040-z	BioMed Central	Neural Development	1749-8104	The methyl binding domain 3/nucleosome remodelling and deacetylase complex regulates neural cell fate determination and terminal differentiation in the cerebral cortex	1610.4	TRUE			FALSE	cc-by	epmc_xml	oa	TRUE	0	0	0	0	0	0
PMC4320829	25626996	10.1186/s13064-014-0028-0	Springer	Neural Development	1749-8104	Quantitative differences in developmental profiles of spontaneous activity in cortical and hippocampal cultures	1610.4	TRUE			FALSE	cc-by	epmc_xml	oa	TRUE	0	0	0	0	0	0
PMC4429366	25972975	10.1186/1866-1955-7-1	Biomed Central	Journal of Neurodevelopmental Disorders	1866-1947, 1866-1955	An fMRI study of facial emotion processing in children and adolescents with 22q11.2 Deletion Syndrome	1610.4	TRUE			FALSE	cc-by	epmc_xml	oa	TRUE	NIH & NIMH award to UCLA, subawarded to King's			(CFDA NO. 93.242). The UCLA have a subaward to KCL Number 2000 G PR916
PMC4269958	25496535	10.1186/s13018-014-0135-y	Biomed Central	Jurnal of Othopaedic Surgery and Research	1749-799X	Investigating the biological response of human mesenchymal stem cells to titanium surfaces	1610.4	TRUE			FALSE	cc-by	epmc_xml	oa	TRUE	Wellcome Trust	University of Newcastle		JXR11397
PMC4596600	26283750	10.4269/ajtmh.14-0618	American Society of Tropical Medicine and Hygiene	American Journal of Tropical Medicine and Hygiene	0002-9637, 1476-1645	The high burden of malaria in primary school children in southern Malawi.	1611.76	TRUE			FALSE	cc-by	epmc_xml	hybrid	TRUE	Wellcome Trust			WT098045
PMC4365920	25575749	10.1016/j.ijpara.2014.11.002	Elsevier	International Journal of Parasitology	0020-7519, 1879-0135	Epidermal keratinocytes initiate wound healing and pro-inflammatory immune responses following percutaneous schistosome infection	1612.53	TRUE			FALSE	cc-by	epmc_xml	hybrid	TRUE	Wellcome Trust	0	0	092745/Z/10/Z	0	0
PMC4509782	26005952	10.1016/j.envres.2015.05.010	Elsevier	Environmental Research	0013-9351, 1096-0953	Place of work and residential exposure to ambient air pollution and birth outcomes in Scotland, using geographically fine pollution climate mapping estimates	1614.95	TRUE			FALSE	cc-by	epmc_xml	hybrid	TRUE	Wellcome Trust	0	0	WT086113
PMC4505686	25648658	10.1021/cn500369h	ACS	ACS Chemical Neuroscience	1948-7193	Varenicline Interactions at the 5-HT3 Receptor Ligand Binding Site are Revealed by 5-HTBP	1617.68	TRUE			FALSE	cc-by	epmc_xml	hybrid	TRUE	0	0	0	0	0	0
PMC4550709	26307618	10.1136/bmjopen-2015-008610	BMJ	BMJ Open	2044-6055	Development of a universal approach to increase physical activity among adolescents: The GoActive Intervention	1618.51	TRUE			FALSE	cc-by	epmc_xml	oa	TRUE	0	0	0	0	0	0
PMC4442207	25976759	10.1136/bmjopen-2014-006593	BMJ	BMJ Open	2044-6055	The influence of friends and siblings on the physical activity and screen viewing behaviours of 5-6 year old children: a qualitative analysis of parent interviews	1620	TRUE			FALSE	cc-by	epmc_xml	oa	TRUE	British Heart Foundation			PG/11/51/28986
PMC4369002	25795689	10.1136/bmjopen-2014-006625	BMJ	BMJ Open	2044-6055	The feasibility of meeting the World Health Organization guidelines for sodium and potassium: a cross-national comparison study	1620	TRUE			FALSE	cc-by	epmc_xml	oa	TRUE	0	0	0	0	0	0
PMC4335379	25560400	10.1530/ERC-14-0454	Society for Endocrinology	Endocrine-Related Cancer	1351-0088, 1479-6821	HES5 silencing is an early and recurrent change in prostate tumourigenesis	1620	TRUE			FALSE	cc-by	epmc_xml	hybrid	TRUE	0	0	0	0	0	0
PMC4336461	25687898	10.1136/bmjopen-2014-006000	BMJ	BMJ Open	2044-6055	Dynamics of resilience in forced migration: A one-year follow-up study of longitudinal associations with mental health in a conflict-affected ethnic Muslim population	1620	TRUE			FALSE	cc-by	epmc_xml	oa	TRUE	Wellcome Trust			089401/Z/09/Z
PMC4390689	25833665	10.1136/bmjopen-2014-006456	BMJ	BMJ Open	2044-6055	Social support and the incidence and persistence of depression between antenatal and postnatal examinations in Turkey, a cohort study	1620	TRUE			FALSE	cc-by	epmc_xml	oa	TRUE	Wellcome Trust			080100/Z/06A
PMC4636673	26503396	10.1136/bmjopen-2015-009625	BMJ	BMJ Open	2044-6055	The relative importance of perceived doctor's attitude on the decision to consult for symptomatic osteoarthritis	1620	TRUE			FALSE	cc-by	epmc_xml	oa	TRUE	ARUK			18174
PMC4577875	26384724	10.1136/bmjopen-2015-008522	BMJ	BMJ Open	2044-6055	How parents and practitioners experience research without prior consent (deferred consent) for emergency research involving children: a mixed method study	1620	TRUE			FALSE	cc-by	epmc_xml	oa	TRUE	Wellcome Trust			WT095874MF
PMC4420977	25922103	10.1136/bmjopen-2014-007276	BMJ	BMJ Open	2044-6055	Prevalence of sexually transmitted infections in female clinic attendees in Honiara, Solomon Islands.	1620	TRUE			FALSE	cc-by	epmc_xml	oa	TRUE	Wellcome Trust			WT102807
PMC4577944	26373398	10.1136/bmjopen-2015-008105	BMJ	BMJ Open	2044-6055	Body Mass Index in early and middle adult life: prospective associations with myocardial infarction, stroke and diabetes over a 30 year period; the British Regional Heart Study	1620	TRUE			FALSE	cc-by	epmc_xml	oa	TRUE	BHF			PG/10/030/28330 and RG/08/013/25942
PMC4434528	25860834	10.1021/acs.jmedchem.5b00104	ACS	Journal of Medicinal Chemistry	0022-2623, 1520-4804	pkCSM: Predicting Small-Molecule Pharmacokinetic and Toxicity Properties Using Graph-Based Signatures	1620.64	TRUE			FALSE	cc-by	epmc_xml	hybrid	TRUE	0	0	0	0	0	0
PMC4432681	25744884	10.1152/jn.00753.2014	American Physiological Society	Journal of Neurophysiology	0022-3077, 1522-1598	Decoding the future from past experience: learning shapes predictions in early visual cortex	1623.26	TRUE			FALSE	cc-by	epmc_xml	hybrid	TRUE	0	0	0	0	0	0
PMC4442397	25673715	10.1128/JVI.01653-14	ASM	Journal of Virology	0022-538X, 1098-5514	Hepatitis C virus attenuates mitochondrial lipid ?-oxidation by down-regulating mitochondrial trifunctional protein expression.	1624	TRUE			FALSE	cc-by	epmc_xml	hybrid	TRUE	Wellcome Trust	0	0	WT090805	0	0
PMC4540785	25595331	10.1007/s10926-014-9564-z	Springer	Journal of Occupational Rehabilitation	1053-0487, 1573-3688	Should general practitioners issue a sick certificate?	1627.82	TRUE			FALSE	cc-by	epmc_xml	hybrid	TRUE	ARUK			13413
PMC4579404	26143621	10.1016/j.yhbeh.2015.06.014	APA (American Psychological Association)	Homons and behavior	0018-506X, 1095-6867	Utilizing induced pluripotent stem cells (iPSCs) to understand the actions of estrogens in human neurons.	1629	TRUE			FALSE	cc-by	epmc_xml	hybrid	TRUE	King's Health Partners Research and Development Challenge Grant	Wellcome Trust ISSF		R130587	97819
PMC4469876	25659483	10.1152/ajpheart.00480.2014	American Physiological Society	American Journal of Physiology	0363-6135, 1522-1539	Noninvasive pulmonary artery wave intensity analysis in pulmonary hypertension	1630.91	TRUE			FALSE	cc-by	epmc_xml	hybrid	TRUE	British Heart Foundation			BHF FS/11/76/29037
PMC4592105	26336150	10.4049/jimmunol.1500870.	Dartmouth Journal Services	Journal of Immunology	0022-1767, 1550-6606	Delinking CARD9 and IL-17	1636.21	TRUE			FALSE	cc-by	epmc_xml	hybrid	TRUE	Wellcome Trust	0	0	102705	0	0
PMC4287617	25569153	10.1371/journal.ppat.1004605	PLOS	PLoS Pathogens	1553-7366, 1553-7374	The Molecular Basis for Control of ETEC Enterotoxin Expression in Response to Environment and Host	1636.37	TRUE			FALSE	cc0	epmc_xml	oa	TRUE	Wellcome Trust	0	0	WT085092MA	0	0
PMC4257840	25365789	10.1021/jm501102h	American Chemical Society	Journal of Medicinal Chemistry	0022-2623, 1520-4804	The discovery of potent,selective and reversible inhibitors of the house dust mite peptidase allergen Der p 1: An innovative approach to the treatment of allergic asthma	1648.05	TRUE			FALSE	cc-by	epmc_xml	hybrid	TRUE	WT
PMC4210505	25331815	10.1186/1471-2164-15-916	BioMed Central	BMC Genomics	1471-2164	Changes in renal medulla gene expression in a pre-clinical model of post cardiopulmonary bypass acute kidney injury	1650	TRUE			FALSE	cc-by	epmc_xml	oa	TRUE	British Heart Foundation			PG/08 /044/25068
PMC4549913	26306617	10.1186/s12887-015-0421-9	BioMed Central	BMC Public Health	1471-2431	He's probably more Mr. sport than me" - A qualitative exploration of mothers' perceptions of fathers' role in their children's physical activity	1650	TRUE			FALSE	cc-by	epmc_xml	oa	TRUE	British Heart Foundation			PG/11/51/28986	FS/13/38/30319
PMC4429825	25613468	10.1186/1471-2288-15-6	BioMed Central	BMC Medical Research Methodology	1471-2288	Standardisation of information submitted to an endpoint committee for cause of death assignment in a cancer screening trial - lessons learnt from CAP (Cluster randomised triAl of PSA testing for Prostate cancer)	1650	TRUE			FALSE	cc-by	epmc_xml	oa	TRUE	Cancer Research UK			RJ5715
PMC4273996	25452566	10.4049/Jimmunol.1401785	American Association of Immunologists	Journal of Immunology	0022-1767, 1550-6606	Antibody Stabilization of Peptideâ€“MHC Multimers Reveals Functional T Cells Bearing Extremely Low-Affinity TCRs	1650	TRUE			FALSE	cc-by	epmc_xml	hybrid	TRUE	Wellcome Trust			WT100327MA
PMC4332422	25652111	10.1186/s12888-015-0390-4	Biomed Central	BMC Psychiatry	1471-244X	Psychometric Properties of EURO-D, a Geriatric Depression Scale: A Cross-Cultural Validation Study	1650	TRUE			FALSE	cc-by	epmc_xml	oa	TRUE	Wellcome Trust			GR08002
PMC4381479	25885589	10.1186/s12889-015-1550-7	BioMed Central	BioMed Central Public Health	1471-2458	Associations between diet, physical activity and body fat distribution: a cross sectional study in an Indian population.	1650	TRUE			FALSE	cc-by	epmc_xml	oa	TRUE	Wellcome Trust			WT083707MA
PMC4404268	25888480	10.1186/s12874-015-0018-x	BioMed Central	Medical Research Methodology	1471-2288	Validation of death prediction after breast cancer relapses using joint models.	1650	TRUE			FALSE	cc-by	epmc_xml	oa	TRUE	Cancer Research UK			C1336/A11700
PMC4301889	25539802	10.1186/s12863-014-0136-1	Biomed Central	B M C Genetics	1471-2156	Chromosome 16q22 variants in a region associated with cardiovascular phenotypes correlate with ZFHX3 expression in a transcript-specific manner	1650	TRUE			FALSE	cc-by	epmc_xml	oa	TRUE
PMC4430914	25924825	10.1186/s12911-015-0148-4	BioMed Central	BMC Medical Informatics & Decision Making	1472-6947	Engineering a mobile health tool for resource-poor settings to assess and manage cardiovascular disease risk: SMARThealth study	1650	TRUE			FALSE	cc-by	epmc_xml	oa	TRUE	Wellcome Trust				088877/Z/09/Z
PMC4463864	25944614	10.1016/j.neuroimage.2015.04.058	Elsevier	Neuroimage	1053-8119, 1095-9572	Cortical Maturation and Myelination in Healthy Toddlers and Young Children	1652.45	TRUE			FALSE	cc-by	epmc_xml	hybrid	TRUE	Wellcome Trust			PASRFAC			87436
PMC4230915	25393620	10.1371/journal.pntd.0003285	PLOS	PLoS Neglected Tropical Diseases	1935-2727, 1935-2735	Association between Footwear Use and Neglected Tropical Diseases: A Systematic Review and Meta-Analysis	1653.91	TRUE			FALSE	cc-by	epmc_xml	oa	TRUE	Wellcome Trust			WT PHATIC fellowship (number 099876)
PMC4545771	26542371	10.1186/s12890-015-0090-3	BioMed Central	BMC Pulmonary Medicine	1471-2466	Study protocol: the effects of air pollution exposure and chronic respiratory disease on pneumonia risk in urban Malawian adults--the Acute Infection of the Respiratory Tract Study (The AIR Study).	1654	TRUE			FALSE	cc-by	epmc_xml	oa	TRUE	Wellcome Trust			WT099929/B/12/Z
PMC4524428	26244061	10.1186/s13148-015-0104-2	BioMed Central	Clinical Epigenetics	1868-7075, 1868-7083	Epigenome-Wide Association Study reveals decreased average methylation levels years before breast cancer diagnosis	1656	TRUE			FALSE	cc-by	epmc_xml	oa	TRUE	BCC & CRUK			2009MaySF03 C536/A13086
PMC4473568	25926634	10.1128/JVI.00683-15	ASM	Journal of Virology	0022-538X, 1098-5514	The human adenovirus type 5 L4 promoter is negatively regulated by TFII-I and by L4-33K	1656	TRUE			FALSE	cc-by	epmc_xml	hybrid	TRUE	Wellcome Trust	Higher Committee for Education Development in Iraq		WT094713MA
PMC4604721	26463044	10.1186/s12966-015-0296-z	Biomed Central	International Journal of Behavioral Nutrition and Physical Activity	1479-5868	Perceived eating norms and vegetable consumption in children	1656.3	TRUE			FALSE	cc-by	epmc_xml	oa	TRUE	Wellcome Trust			097826/Z/11/A
PMC4608915	26174834	10.1096/fj.15-276493	FASEB	FASEB Journal	0892-6638, 1530-6860	Palmitoylation of the Na/Ca exchanger (NCX1) cytoplasmic loop controls its inactivation and internalization durinh stress signaling	1660.01	TRUE			FALSE	cc-by	epmc_xml	hybrid	TRUE	British Heart Foundation				PG/12/6/29366
PMC4509783	25963106	10.1016/j.appet.2015.04.069	Elsevier	Appetite	0195-6663, 1095-8304	The nutritional content and cost of supermarket ready-meals. Cross-sectional analysis	1665.68	TRUE			FALSE	cc-by	epmc_xml	hybrid	TRUE	0	0	0	0	0	0
PMC4398321	25703928	10.1016/j.antiviral.2015.02.005	Elsevier	Antiviral Research	0166-3542, 1872-9096	Epoxide based inhibitors of the hepatitis C virus non-structural 2 autoprotease.	1666.27	TRUE			FALSE	cc-by	epmc_xml	hybrid	TRUE	Wellcome Trust	0	0	WT093786	0	0
PMC4604734	26292267	10.1016/j.mcn.2015.08.006	Elsevier	Molecular and Cellular Neuroscience	1044-7431, 1095-9327	The generation of knock-in mice expressing fluorescently tagged galanin receptors 1 and 2	1666.94	TRUE			FALSE	cc-by	epmc_xml	hybrid	TRUE	MRC	Wellcome Trust		WT092683MA	WT081485MA
PMC4504026	25862983	10.1016/j.appet.2015.04.004	Elsevier	Appetite	0195-6663, 1095-8304	Parental control over feeding in infancy: influence of infant weight, appetite and feeding method	1672.99	TRUE			FALSE	cc-by	epmc_xml	hybrid	TRUE	Cancer Research UK			C1418/A7974
PMC4374651	25848242	10.2147/COPD.S75454	Dove Medical Press	International Journal of Chronic Obstructive Pulmonary Disease	1176-9106, 1178-2005	COPD and its association with smoking in the Mainland China: a cross-sectional analysis of 0.5 million men and women from ten diverse areas	1674	TRUE			FALSE	cc-by	epmc_xml	oa	TRUE	Wellcome Trust				88158	104085
PMC4373756	25541297	10.1016/j.joca.2014.12.012	Elsevier	Osteoarthritis and Cartilage	1063-4584, 1522-9653	Targeted mutation of NOV/CCN3 in mice disrupts joint homeostasis and causes osteoarthritis-like disease.	1675.08	TRUE			FALSE	cc-by	epmc_xml	hybrid	TRUE
PMC4372040	25858350	10.1186/s12916-015-0290-y	BioMed Central	BMC Medicine	1741-7015	The Brief Memory and Executive Test (BMET) for detecting vascular cognitive impairment in small vessel disease: a validation study	1676.7	TRUE			FALSE	cc-by	epmc_xml	oa	TRUE	0	0	0	0	0	0
PMC4582769	26006085	10.1016/j.vaccine.2015.05.025	Elsevier	Vaccine	0264-410X, 1873-2518	Understanding immune protection against tuberculosis using RNA expression profiling.	1678.03	TRUE			FALSE	cc-by	epmc_xml	hybrid	TRUE	WT			100693/Z/12/Z
PMC4509715	26004671	10.1016/j.appet.2015.05.022	Elsevier	Appetite	0195-6663, 1095-8304	Prevalence and socio-demographic correlates of time spent cooking by adults in the 2005 UK Time Use Survey. Cross-sectional analysis	1679.92	TRUE			FALSE	cc-by	epmc_xml	hybrid	TRUE	0	0	0	0	0	0
PMC4648160	25663044	10.1093/ijnp/pyv013	Oxford University Press	International Journal of Neuropsychopharmacology	1461-1457, 1469-5111	Tryptophan Depletion Promotes Habitual over Goal-Directed Control of Appetitive Responding in Humans	1680	TRUE			FALSE	cc-by	epmc_xml	hybrid	TRUE	0	0	0	0	0	0
PMC4342963	25688018	10.1098/rstb.2013.0559		Philosophical Transactions B: Biological Sciences	0962-8436, 1471-2970	Potential effects of warmer worms and vectors on onchocerciasis transmission in West Africa	1680	TRUE			FALSE	cc-by	epmc_xml	hybrid	TRUE	Wellcome Trust			085133/Z/08/Z; 092677/Z/10/Z
PMC4429942	25948111	10.1186/s12936-015-0706-3	BioMed Central	Malaria Journal	1475-2875	Defining the relationship between Plasmodium vivax parasite rate and clinical disease	1680	TRUE			FALSE	cc-by	epmc_xml	oa	TRUE	Wellcome Trust				95066
PMC4416324	25927522	10.1186/s12936-015-0671-x	BioMed Central	Malaria Journal	1475-2875	Lessons learnt from the first controlled human malaria infection study conducted in Nairobi, Kenya	1680	TRUE			FALSE	cc-by	epmc_xml	oa	TRUE	Wellcome Trust				0907940/Z/11/Z
PMC4648156	25857822	10.1093/ijnp/pyv041	Oxford University Press	International Journal of Neuropsychopharmacology	1461-1457, 1469-5111	Dopamine regulates approach-avoidance in human sensation-seeking	1680	TRUE			FALSE	cc-by	epmc_xml	hybrid	TRUE	Wellcome Trust	MRC			PhD studentship
PMC4512257	26028469	10.1016/j.neuroscience.2015.05.048	Elsevier	Neuroscience	0306-4522, 1873-7544	The effect of neuronal conditional knock-out of peroxisome proliferator-activated receptors in the MPTP mouse model of Parkinsonâ€™s disease	1680.54	TRUE			FALSE	cc-by	epmc_xml	hybrid	TRUE	Wellcome Trust	0	0	WT080782MF	0	0
PMC4539883	26079277	10.1016/j.meegid.2015.06.014	Elsevier	Infection Genetics and Evolution	1567-1348, 1567-7257	Wild waterfowl migration and domestic duck density shape the epidemiology of highly pathogenic H5N8 influenza in the Republic of Korea	1685.1	TRUE			FALSE	cc-by	epmc_xml	hybrid	TRUE	Wellcome Trust				102427/Z/13/Z
PMC4463853	25871628	10.1016/j.neuroimage.2015.04.015	Elsevier	NeuroImage	1053-8119, 1095-9572	Alterations in cortical thickness development in preterm-born individuals: implications for high-order cognitive functions	1686.58	TRUE			FALSE	cc-by	epmc_xml	hybrid	TRUE	Wellcome Trust			065699/Z/01/Z
PMC4654742	26162557	10.1007/s00127-015-1086-2	Springer	Social Psychiatry and Psychiatric Epidemiology	0933-7954, 1433-9285	The Longitudinal Association between Psychotic Experiences,Depression and Suicidal Behaviour in a Population Sample of Adolescents	1688.08	TRUE			FALSE	cc-by	epmc_xml	hybrid	TRUE	Wellcome Trust	MRC		WT092731
PMC4414363	25818052	10.1016/j.neuroscience.2015.03.042	Elsevier	Neuroscience	0306-4522, 1873-7544	Osteoarthritis dependent changes in antinociceptive action of Nav 1.7 and Nav1.8 sodium channel blockers: an in vivo electrophysiological study in the rat	1689	TRUE			FALSE	cc-by	epmc_xml	hybrid	TRUE	Arthritis Research UK			19444
PMC4459735	25900212	10.1016/j.ijpara.2015.03.002	Elsevier	International Journal for Parasitology	0020-7519, 1879-0135	Biogenesis of the crystalloid organelle in Plasmodium involves microtubule-dependent vesicle transport and assembly.	1694.65	TRUE			FALSE	cc-by	epmc_xml	hybrid	TRUE	Wellcome Trust			WT088449 and WT076648
PMC4463859	25957991	10.1016/j.neuroimage.2015.04.061	Elsevier	NeuroImage	1053-8119, 1095-9572	Brain structure correlates of emotion-based rash impulsivity	1696.12	TRUE			FALSE	cc-by	epmc_xml	hybrid	TRUE	Wellcome Trust			ISSF 2013-14
PMC4502445	25957007	10.1016/j.cortex.2015.03.025	Elsevier	Cortex	0010-9452, 1973-8102	Active inference, communication and hermeneutics	1697.14	TRUE			FALSE	cc-by	epmc_xml	hybrid	TRUE	Wellcome Trust			088139/Z/09/Z
PMC4558461	26032883	10.1016/j.neuroimage.2015.05.064	Elsevier	Neuroimage	1053-8119, 1095-9572	Characterising seizures in anti-NMDA-receptor encephalitis with Dynamic Causal Modelling.	1697.14	TRUE			FALSE	cc-by	epmc_xml	hybrid	TRUE	Wellcome Trust			088130/Z/09/Z
PMC4596151	0	10.1016/j.appet.2015.06.009	Elsevier	Appetite	0195-6663, 1095-8304	Training response inhibition to food is associated with weight loss and reduced calorie intake	1698.21	TRUE			FALSE	cc-by	epmc_xml	hybrid	TRUE	Wellcome Trust	European Union	0	WT097835MF	(FP7/2007-2013)/ERC Grant Agreement No. 312445	0
PMC4549856	26306801	10.1186/s13024-015-0038-3	BioMed Central	Molecular Neurodegeneration	1750-1326	Distinct clinical and neuropathological features of G51D SNCA mutation cases compared with SNCA duplication and H50Q mutation	1698.3	TRUE			FALSE	cc-by	epmc_xml	oa	TRUE	Wellcome Trust	MRC			G0700943, G1100643
PMC4660835	26058898	10.1186/s12915-015-0149-x	BioMed Central	BMC Biology	1741-7007	Telomere protein Rap1 is a charge resistant scaffolding protein in chromosomal bouquet formation	1698.3	TRUE			FALSE	cc-by	epmc_xml	oa	TRUE	Cancer Research UK			C36439/A12097
PMC4638189	0	10.1016/j.joca.2015.06.018	Elsevier	Osteoarthritis and Cartilage	1063-4584, 1522-9653	Changes in peripheral blood immune cell composition in osteoarthritis	1699.81	TRUE			FALSE	cc-by	epmc_xml	hybrid	TRUE	Arthritis Research UK	0	0	19545	20083	0
PMC4499711	26180638	10.1136/bmjresp-2015-000081	BMJ	BMJ Open Respiratory Research	2052-4439	Breastfeeding, lung volumes and alveolar size at school-age	1700	TRUE			FALSE	cc-by	epmc_xml	oa	TRUE	Wellcome
PMC4432996	25962509	10.1186/s12974-015-0313-9	BioMed Central	Journal of Neuroinflammation	1742-2094	Autoantigen cross-reactive environmental antigen can trigger multiple sclerosis-like disease	1703.25	TRUE			FALSE	cc-by	epmc_xml	oa	TRUE	WT			WT095472MA
PMC4191405	25209233	10.1093/nar/gku828	Oxford University Press	Nucleic Acids Research	0305-1048, 1362-4962	Chromosome position effects on gene expression in Escherichia coli K-12	1704	TRUE			FALSE	cc-by	epmc_xml	oa	TRUE	Wellcome Trust	0	0	76689	0	0
PMC4344490	25670677	10.1093/nar/gkv012	Oxford University Press	Nucleic Acids Research	0305-1048, 1362-4962	DNA recognition by Escherichia coli CbpA protein requires a conserved arginine-minor-groove interaction	1704	TRUE			FALSE	cc-by	epmc_xml	oa	TRUE	Wellcome Trust	BBSRC	0	WT085092MA	BB/H010289/1	0
PMC4608117	26472204	10.1186/s12889-015-2301-5	BioMed Central	BMC Public Health	1471-2458	Association of socio-economic position and suicide/attempted suicide in low and middle income countries in South and South-East Asia â€“ a systematic review	1704	TRUE			FALSE	cc-by	epmc_xml	oa	TRUE	Wellcome Trust			WT099874MA
PMC4344499	25653156	10.1093/nar/gkv051	Oxford University Press	Nucleic Acids Research	0305-1048, 1362-4962	Insights into the mechanism of a G-quadruplex-unwinding DEAH-box helicase	1704	TRUE			FALSE	cc-by	epmc_xml	oa	TRUE	0	0	0	0	0	0
PMC4605302	26250113	10.1093/nar/gkv799	Oxford University Press	Nucleic Acids Research	0305-1048, 1362-4962	A conserved Pol? binding module in Ctf18-RFC is required for S-phase checkpoint activation downstream of Mec1.	1704	TRUE			FALSE	cc-by	epmc_xml	oa	TRUE	Wellcome Trust				097945/B/11/Z	102943/Z/13/Z
PMC4489285	25883141	10.1093/nar/gkv332	Oxford University Press	Nucleic Acids Research	0305-1048, 1362-4962	JPred4: a protein secondary structure prediction server	1704	TRUE			FALSE	cc-by	epmc_xml	oa	TRUE	Wellcome Trust				92340	83481
PMC4227765	25300492	10.1093/nar/gku900	Oxford University Press	Nucleic Acids Research	0305-1048, 1362-4962	Locus-specific control of DNA resection and suppression of subtelomeric VSG recombination by HAT3 in the African trypanosome.	1704	TRUE			FALSE	cc-by	epmc_xml	oa	TRUE	Wellcome Trust				100320/Z/12/Z
PMC4333376	25550424	10.1093/nar/gku1310	Oxford University Press	Nucleic Acids Research	0305-1048, 1362-4962	Modified ribosome profiling reveals high abundance of ribosome protected mRNA fragments derived from 3? untranslated regions	1704	TRUE			FALSE	cc-by	epmc_xml	oa	TRUE	Wellcome Trust				89999
PMC4381068	0	10.1093/nar/gkv159	Oxford University Press	Nucleic Acids Research	0305-1048, 1362-4962	Cwc21p promotes the second step conformation of the spliceosome and modulates 3ÃƒÂ¢Ã¢â€šÂ¬Ã¢â€žÂ¢ splice site selection	1704	TRUE			FALSE	cc-by	epmc_xml	oa	TRUE	Wellcome Trust	0	0	087551, 092076
PMC4333374	0	10.1093/nar/gku1305	Oxford University Press	Nucleic Acids Research	0305-1048, 1362-4962	Inter-Individual Variability Contrasts with Regional Homogeneity in the Human Brain DNA Methylome.	1704	TRUE			FALSE	cc-by	epmc_xml	oa	TRUE	Wellcome Trust	0	0	077224 and 092076
PMC4482084	0	10.1093/nar/gkv330	Oxford University Press	Nucleic Acids Research	0305-1048, 1362-4962	NMD3 regulates both mRNA and rRNA nuclear export in African trypanosomes via an XPOI-linked pathway	1704	TRUE			FALSE	cc-by	epmc_xml	oa	TRUE	Wellcome Trust	0	0	WT088293, WT095831
PMC4344528	0	10.1093/nar/gkv096	Oxford University Press	Nucleic Acids Research	0305-1048, 1362-4962	Structural role of the flanking DNA in mariner transposon excision	1704	TRUE			FALSE	cc-by	epmc_xml	oa	TRUE	Wellcome Trust	0	0	085176/Z/08/Z
PMC4424887	25927974	10.1186/s12885-015-1335-5	Biomed Central	BMC Cancer	1471-2407	Transcriptional implications of intragenic DNA methylation in the oestrogen receptor alpha gene in breast cancer cells and tissues	1704	TRUE			FALSE	cc-by	epmc_xml	oa	TRUE	CRUK			A13086
PMC4288179	25488812	10.1093/nar/gku1287	Oxford University Press	Nucleic Acids Research	0305-1048, 1362-4962	Synergic interplay of the La motif, RRM1, and the interdomain linker of LARP6 in the recognition of collagen mRNA expands the RNA binding repertoire of the La module	1704	TRUE			FALSE	cc-by	epmc_xml	oa	TRUE	Wellcome Trust			085944/B/08/Z
PMC4344507	25653165	10.1093/nar/gkv068	Oxford University Press	Nucleic Acids Research	0305-1048, 1362-4962	Structural and functional characterisation of a cell cycle associated HDAC1/2 complex reveals the structural basis for complex assembly and nucleosome targeting	1704	TRUE			FALSE	cc-by	epmc_xml	oa	TRUE	Wellcome Trust	0	0	HDAC complexes Wellcome Trust085408, Wellcome Trust100237	0	0
PMC4330370	0	10.1093/nar/gkv003	Oxford University Press	Nucleic Acids Research	0305-1048, 1362-4962	Bacterila globla regulators DksA/ppGpp increase fidelity of transcription	1704	TRUE			FALSE	cc-by	epmc_xml	oa	TRUE	Wellcome Trust	0	0	102851/Z/13/Z	0	0
PMC4446447	0	10.1093/nar/gkv409	Oxford University Press	Nucleic Acids Research	0305-1048, 1362-4962	The 9-1-1 checkpoint clamp coordinates resection of DNA double strand breaks	1704	TRUE			FALSE	cc-by	epmc_xml	oa	TRUE	Wellcome Trust	0	0	093088/Z/10/Z	0	0
PMC4448545	26016697	10.1186/s13063-015-0756-4	BioMed Central	Trials	1745-6215	Effects of cognitive behavioural therapy for insomnia on the mental health of university students: study protocol for a randomized controlled trial	1704	TRUE			FALSE	cc-by	epmc_xml	oa	TRUE	Wellcome Trust				98461
PMC4517551	26215050	10.1186/s12864-015-1729-4	BioMed Central	BMC Genomics	1471-2164	Genomic analyses of pneumococci reveal a wide diversity of bacteriocins â€“ including pneumocyclicin, a novel circular bacteriocin	1704	TRUE			FALSE	cc-by	epmc_xml	oa	TRUE	Wellcome Trust				083511/Z/07/Z
PMC4472616	26084626	10.1186/s12911-015-0171-5	BioMed Central	BMC Medical Informatics and Decision Making	1472-6947	Using a mobile health application to support self-management in chronic obstructive pulmonary disease: a six-month cohort study	1704	TRUE			FALSE	cc-by	epmc_xml	oa	TRUE	Wellcome Trust				HICF-1010-032
PMC4267644	25414342	10.1093/nar/gku1219	Oxford University Press	Nucleic Acids Research	0305-1048, 1362-4962	Rad51/Dmc1 paralogs and mediators oppose DNA helicases to limit hybrid DNA formation and promote crossovers during meiotic recombination	1704	TRUE			FALSE	cc-by	epmc_xml	oa	TRUE	Wellcome Trust				90767
PMC4674014	25931392	10.1016/j.brainresbull.2015.04.007	Elsevier	Brain Research Bulletin	0361-9230, 1873-2747	Past, present and future of spike sorting techniques	1706.56	TRUE			FALSE	cc-by	epmc_xml	hybrid	TRUE	Wellcome Trust	EPSRC	MRC	0	EP/H051651/1	G1002100
PMC4401442	25725468	10.1016/j.neuroimage.2015.02.036	Elsevier	NeuroImage	1053-8119, 1095-9572	Cortical thickness gradients in structural hierarchies	1707.5	TRUE			FALSE	cc-by	epmc_xml	hybrid	TRUE	0	0	0	0	0	0
PMC4528074	25862259	10.1016/j.neuroimage.2015.03.071	Elsevier	NeuroImage	1053-8119, 1095-9572	A symmetric multivariate leakage correction for MEG connectomes	1708.84	TRUE			FALSE	cc-by	epmc_xml	hybrid	TRUE	Wellcome Trust				98369
PMC4553903	26093275	10.1016/j.exer.2015.06.007	Elsevier	Experimental Eye Research	0014-4835, 1096-0007	RPGR: its role in photoreceptor physiology human disease and	1709.61	TRUE			FALSE	cc-by	epmc_xml	hybrid	TRUE	Wellcome Trust	0	0	100470/Z/12/Z
PMC4527255	26312126	10.1186/s40413-015-0071-2	Biomed Central	World Allergy Organization Journal	1939-4551	Effects of environment on human cytokine responses during childhood in the tropics: role of urban versus rural residence	1710	TRUE			FALSE	cc-by	epmc_xml	oa	TRUE	WT
PMC4588166	26379239	10.1371/journal.pcbi.1004463	PLOS	PLOS Computational Biology	1553-734X, 1553-7358	Model-based reasoning in humans becomes automatic with training	1710	TRUE			FALSE	cc-by	epmc_xml	oa	TRUE	Wellcome Trust	MRC		098362/Z/12/Z	G1000411
PMC4441043	25795342	10.1016/j.neuroimage.2015.03.004	Elsevier	NeuroImage	1053-8119, 1095-9572	Agreement and repeatability of vascular reactivity estimates based on a breath-hold task and a resting state scan	1711.76	TRUE			FALSE	cc-by	epmc_xml	hybrid	TRUE	Wellcome Trust			WT090199
PMC4461310	25862264	10.1016/j.neuroimage.2015.03.070	Elsevier	NeuroImage	1053-8119, 1095-9572	Is fMRI "noise" really noise? Resting state nuisance regressors remove variance with network structure	1711.76	TRUE			FALSE	cc-by	epmc_xml	hybrid	TRUE	Wellcome Trust			WT090199
PMC4277294	25497243	10.1016/j.ahj.2014.10.008	Elsevier	American Heart Journal	0002-8703, 1097-6744	Rationale and design of the Clinical Evaluation of Magnetic Resonance Imaging in Coronary heart disease 2 trial (CE-MARC 2): A prospective, multicenter, randomized trial of diagnostic strategies in suspected coronary heart disease	1712.15	TRUE			FALSE	cc-by	epmc_xml	hybrid	TRUE	British Heart Foundation	0	0	SP/12/1/29062	0	0	C303/A14301
PMC4256464	0	10.1371/journal.ppat.1004547	PLOS	PLoS Pathogens	1553-7366, 1553-7374	Plasma membrane-located purine nucleotide transport proteins are key components for host cell exploitation by microsporidian intracellular parasites	1712.22	TRUE			FALSE	cc-by	epmc_xml	oa	TRUE	Wellcome Trust	0	0	075796/Z/04/Z	0	0
PMC4403260	25877920	10.1101/gad.251470.114	Cold Spring Harbor Laboratory Press	Genes & Development	0890-9369, 1549-5477	Pcf11 orchestrates transcription termination pathways in yeast	1712.46	TRUE			FALSE	cc-by	epmc	hybrid	TRUE	Wellcome Trust				BURTBB00 091805/2/10/2
PMC4315810	25542740	10.1016/j.puhe.2014.10.019	Elsevier	Public Health	0033-3506, 1476-5616	Standardised (plain) cigarette packaging increases attention to both text-based and graphical health warnings: experimental evidence.	1713.76	TRUE			FALSE	cc-by	epmc_xml	hybrid	TRUE	Wellcome Trust			WT094017/Z/10/Z
PMC4456468	25724106	10.1016/j.ypmed.2015.02.009	Elsevier	Preventive Medicine	0091-7435, 1096-0260	Contrasts in active transport behaviour across four countries: How do they translate into public health benefits?	1717.28	TRUE			FALSE	cc-by	epmc_xml	hybrid	TRUE	0	0	0	0	0	0
PMC4519246	26222887	10.1371/journal.pntd.0003946	PLOS	PLoS Neglected Tropical Diseases	1935-2727, 1935-2735	Mapping and modelling the geographical distribution and environmental limits of podoconiosis in Ethiopia	1717.54	TRUE			FALSE	cc-by	epmc_xml	oa	TRUE	Wellcome Trust			99876; 099876; 091956; 098045; #095066
PMC4534772	25973788	10.1016/j.cortex.2015.03.024	Elsevier	Cortex	0010-9452, 1973-8102	Humour processing in frontotemporal lobar degeneration: a behavioural and neuroanatomical analysis	1718.04	TRUE			FALSE	cc-by	epmc_xml	hybrid	TRUE	Wellcome Trust	MRC		091673/Z/10/Z	MR/J011274/1
PMC4410946	25776212	10.1016/j.neuroimage.2015.03.008	Elsevier	Neuroimage	1053-8119, 1095-9572	Gradient-free MCMC Methods for Dynamic Causal Modelling	1719.51	TRUE			FALSE	cc-by	epmc_xml	hybrid	TRUE	Wellcome Trust			088130/Z/09/Z and 091593/Z/10/Z
PMC4433098	25796342	10.1016/j.biopsycho.2015.03.009	Elsevier	Biological Psychology	0301-0511, 1873-6246	Manipulating motor performance and memory through real-time fMRI neurofeedback	1719.51	TRUE			FALSE	cc-by	epmc_xml	hybrid	TRUE	Wellcome Trust
PMC4441089	25783205	10.1016/j.neuroimage.2015.03.013	Elsevier	Neuroimage	1053-8119, 1095-9572	Prospective motion correction of 3D echo-planar imaging data for functional MRI using optical tracking	1719.51	TRUE			FALSE	cc-by	epmc_xml	hybrid	TRUE	Wellcome Trust			091593/Z10/Z
PMC4558463	25982515	10.1016/j.neuroimage.2015.05.011	Elsevier	NeuroImage	1053-8119, 1095-9572	Overcoming the effects of false positives and threshold bias in graph theoretical analyses of neuroimaging data	1722.73	TRUE			FALSE	cc-by	epmc_xml	hybrid	TRUE	Wellcome Trust			096646/Z/11/Z
PMC4357435	25687711	10.1016/j.puhe.2014.10.012	Elsevier	Public Health	0033-3506, 1476-5616	Area deprivation and age related macular degeneration in the EPIC Norfolk Eye Study	1723.73	TRUE			FALSE	cc-by	epmc_xml	hybrid	TRUE	0	0	0	0	0	0
PMC4564012	26247695	10.1016/j.neuroscience.2015.07.073	Elsevier	Neuroscience	0306-4522, 1873-7544	Electrophysiological evidence for voltage-gated calcium channel 2 (Cav2) modulation of mechano- and thermosensitive spinal neuronal responses in a rat model of osteoarthritis	1725.75	TRUE			FALSE	cc-by	epmc_xml	hybrid	TRUE	Arthritis Research UK			19444
PMC4256472	25473834	10.1371/journal.pntd.0003310	PLOS	PLoS Neglected Tropical Diseases	1935-2727, 1935-2735	Knowledge, Attitudes and Practices about Rabies Prevention and Control: A Community Survey in Tanzan	1726.5	TRUE			FALSE	cc-by	epmc_xml	oa	TRUE	Wellcome Trust			087393/B/08/Z and 082715/B/07/Z
PMC4524249	26063423	10.1128/JVI.01043-15	American Society for Microbiology	Journal of Virology	0022-538X, 1098-5514	Characterization of ribosomal frameshifting in Theiler's murine encephalomyelitis virus	1727.11	TRUE			FALSE	cc-by	epmc_xml	hybrid	TRUE	0	0	0	0	0	0
PMC4509552	25678268	10.1016/j.virusres.2015.02.002	Elsevier	Virus Research	0168-1702, 1872-7492	Functions of the 5? and 3? ends of calicivirus genomes	1728.59	TRUE			FALSE	cc-by	epmc_xml	hybrid	TRUE	0	0	0	0	0	0
PMC4292812	25587359	10.1186/s13073-014-0116-0	BioMed Central	Genome Medicine	1756-994X	Assessment of patient-derived tumour xenografts (PDXs) as a discovery tool for cancer epigenomics	1728.9	TRUE			FALSE	cc-by	epmc_xml	hybrid	TRUE	Wellcome Trust	MRC		99148	G1000411
PMC4488530	26132467	10.1371/journal.ppat.1005021	PLOS	PLOS Pathogens	1553-7366, 1553-7374	Should Symbionts Be Nice or Selfish? Antiviral Effects of Wolbachia Are Costly but Reproductive Parasitism Is Not	1729.21	TRUE			FALSE	cc-by	epmc_xml	oa	TRUE	0	0	0	0	0	0
PMC4496050	26153983	10.1371/journal.ppat.1005031	PLOS	PLoS Pathogens	1553-7366, 1553-7374	Epstein-Barr Virus Proteins EBNA3A and EBNA3C Together Induce Expression of the Oncogenic MicroRNA Cluster miR-221/miR-222 and Ablate Expression of Its Target p57KIP2.	1730.22	TRUE			FALSE	cc-by	epmc_xml	oa	TRUE	WT			097005/Z/11/Z, 099273/Z/12/Z
PMC4506122	26186715	10.1371/journal.pntd.0003938	PLOS	PLOS Neglected Tropical Diseases	1935-2727, 1935-2735	Human Onchocerciasis: Modelling the Potential Long-term Consequences of a Vaccination Programme	1730.22	TRUE			FALSE	cc-by	epmc_xml	oa	TRUE	WT			092677/Z/10/Z
PMC4534299	26266535	10.1371/journal.pntd.0003975	PLOS	PLoS Neglected Tropical Diseases	1935-2727, 1935-2735	Global gene expression profiling through the complete life cycle of Trypanosoma vivax	1730.88	TRUE			FALSE	cc-by	epmc_xml	oa	TRUE	Wellcome Trust			097826/Z/11/A
PMC4401443	25665966	10.1016/j.neuroimage.2015.01.062	Elsevier	Neuroimage	1053-8119, 1095-9572	Multiple linear regression to estimate time-frequency electrophysiological responses in single trials	1730.98	TRUE			FALSE	cc-by	epmc_xml	hybrid	TRUE	Wellcome Trust			Giandomenico Iannetti
PMC4534345	26271072	10.1016/j.jacc.2015.06.014	Elsevier	Journal of the American College of Cardiology	0735-1097, 1558-3597	Incidence of metabolic risk factors among healthy obese adults: 20-year follow-up	1731	TRUE			FALSE	cc-by	epmc_xml	hybrid	TRUE	British Heart Foundation	MRC / ESRC		RE/10/005/28296	MR/K013351/1, ES/J023299/1
PMC4546361	26291793	10.1371/journal.pgen.1005397	PLOS	PLOS Genetics	1553-7390, 1553-7404	Evidence for a common origin of Blacksmiths and Cultivators in the Ethiopian Ari within the last 4500 years: Lessons for clustering-based inference	1732.5	TRUE			FALSE	cc-by	epmc_xml	oa	TRUE	Wellcome Trust			098386/Z/12/Z
PMC4368751	25793737	10.1371/journal.pcbi.1004115	PLOS	PLOS Computational Biology	1553-734X, 1553-7358	Intra-tumour signalling entropy determines clinical outcome in breast and lung cancer	1732.5	TRUE			FALSE	cc-by	epmc_xml	oa	TRUE	British Heart Foundation	EPSRC
PMC4449003	26024504	10.1371/journal.pcbi.1004301	PLOS	PLOS Computational Biology	1553-734X, 1553-7358	Maintaining Homeostasis by Decision-Making	1732.5	TRUE			FALSE	cc-by	epmc_xml	oa	TRUE	Wellcome Trust			091593/Z/10/Z
PMC4460182	26053429	10.1371/journal.pcbi.1004254	PLOS	PLOS Computational Biology	1553-734X, 1553-7358	Monte Carlo Planning method estimates planning horizons during interactive social exchange	1732.5	TRUE			FALSE	cc-by	epmc_xml	oa	TRUE	Wellcome Trust
PMC4488938	26132308	10.1371/journal.pgen.1005304	PLOS	PLOS Genetics	1553-7390, 1553-7404	Novel Role for p110? PI 3-Kinase in Male Fertility through Regulation of Androgen Receptor Activity in Sertoli Cells	1732.5	TRUE			FALSE	cc-by	epmc_xml	oa	TRUE	Cancer Research UK	MRC		C23338/A10200 and C23338/A15965	G1100354
PMC4340051	25710684	10.1371/journal.pntd.0003424	PLOS	PLOS Neglected Tropical Diseases	1935-2727, 1935-2735	Rapid diagnostic tests for dengue virus infection in febrile Cambodian children: Diagnostic accuracy and incorporation into diagnostic algorithms	1732.5	TRUE			FALSE	cc-by	epmc_xml	oa	TRUE	Wellcome Trust
PMC4286576	25455592	10.1016/j.imlet.2014.10.020	Elsevier	Immunology Letters	0165-2478, 1879-0542	TCR and CD28 activate the transcription factor NF-kB in T cells via distinct adaptor signaling complexes	1732.86	TRUE			FALSE	cc-by	epmc_xml	hybrid	TRUE	0	0	0	0	0	0
PMC4477148	26113982	10.1136/bmjresp-2014-000074	BMJ	BMJ Open Respiratory Research	2052-4439	Association between pre-hospital vitamin D status and incident acute respiratory failure in criticalluy ill patients: a retropsective cohort study	1734	TRUE			FALSE	cc-by	epmc_xml	oa	TRUE	Wellcome Trust	MRC	0	WT091864ma	G1100196/1	0
PMC4561674	26357546	10.1136/openhrt-2015-000277	BMJ	Open Heart	2053-3624	Outcomes following repair of anomalous coronary artery from the pulmonary artery in infants: results from a procedure-based national database	1734	TRUE			FALSE	cc-by	epmc_xml	oa	TRUE	British Heart Foundation			CH/1992027/7163
PMC4536361	26290689	10.1136/openhrt-2015-000266	BMJ	Open Heart	2053-3624	Alcohol consumption and risk of incident heart failure in older men: a prospective cohort study	1734	TRUE			FALSE	cc-by	epmc_xml	oa	TRUE	British Heart Foundation			RG/13/16/30528
PMC4315807	25616449	10.1016/j.eplepsyres.2014.11.001	Elsevier	Epilepsy Research	0920-1211, 1872-6844	Factors affecting reorganisation of memory encoding networks in Temporal Lobe Epilepsy	1734.94	TRUE			FALSE	cc-by	epmc_xml	hybrid	TRUE	Wellcome Trust			83148
PMC4523688	25749010	10.1016/j.joca.2015.02.164	Elsevier	Osteoarthritis and Cartilage	1063-4584, 1522-9653	Ankle motion influences the external knee adduction moment and may predict who will respond to lateral wedge insoles?: An ancillary analysis from the SILK trial.	1735.05	TRUE			FALSE	cc-by	epmc_xml	hybrid	TRUE
PMC4626109	26513470	10.1371/journal.pcbi.1004548	PLOS	PLoS Computational Biology	1553-734X, 1553-7358	Structural insights into separase architecture and substrate recognition through computational modelling of caspase-like and death domains	1735.2	TRUE			FALSE	cc-by	epmc_xml	oa	TRUE	Cancer Research UK	0	0	Structural and mechanistic insights into the pathways of mitotic regulation C24461/A12772	0	0
PMC4326465	25675341	10.1371/journal.pcbi.1004041	PLOS	PLoS Computational Biology	1553-734X, 1553-7358	ClonalFrameML: Efficient Inference of Recombination in Whole Bacterial Genomes	1736.57	TRUE			FALSE	cc-by	epmc_xml	oa	TRUE	Wellcome Trust				101237
PMC4307976	25625282	10.1371/journal.pgen.1004876	PLOS	PLoS Genetics	1553-7390, 1553-7404	Identification and Functional Characterization of G6PC2 Coding Variants Influencing Glycemic Traits Define an Effector Transcript at the G6PC2-ABCB11 Locus	1736.57	TRUE			FALSE	cc0	epmc_xml	oa	TRUE	Wellcome Trust				95101
PMC4340041	25480160	10.1113/expphysiol.2014.083139	Wiley	Experimental Physiology	0958-0670, 1469-445X	Refinement of analgesia following thoracotomy and experimental myocardial infarction using the Mouse Grimace Scale	1736.57	TRUE			FALSE	cc-by	epmc_xml	hybrid	TRUE	British Heart Foundation				RG/13/8/30266	FS/11/50/29038
PMC4665369	0	10.1016/j.mito.2015.08.004	Elsevier	Mitochondrion	1567-7249, 1872-8278	The presence of highly disruptive 16s rRNA mutations in clinical samples indicates a wider role for mutations of the mitochondrial ribosome in human disease	1738.19	TRUE			FALSE	cc-by	epmc_xml	hybrid	TRUE	Wellcome Trust	0	0	096919/Z/11/Z	0	0
PMC4528073	25819577	10.1016/j.joca.2015.03.019	Elsevier	Osteoarthritis and Cartilage	1063-4584, 1522-9653	Comprehensive protein profiling of synovial fluid in osteoarthritis following protein equalization	1738.22	TRUE			FALSE	cc-by	epmc_xml	hybrid	TRUE	Wellcome Trust			WT088557MA
PMC4418751	25441644	10.1016/j.jaci.2014.09.006	Elsevier	Journal of Allergy and Clinical Immunology	0091-6749, 1097-6825	Prostaglandin D2 and leukotriene E4 synergize to stimulate diverse TH2 functions and TH2 cell/neutrophil crosstalk.	1739.01	TRUE			FALSE	cc-by	epmc_xml	hybrid	TRUE	Wellcome Trust				091663/Z/10/Z
PMC4576703	26037536	10.1093/molbev/msv126	Oxford University Press	Molecular Biology and Evolution	0737-4038, 1537-1719	Recent evolution in Rattus norvegicus is shaped by declining effective population size	1740	TRUE			FALSE	cc-by	epmc_xml	hybrid	TRUE	Wellcome Trust	0	0	088114/Z/08/A			WT089269/Z/09/Z
PMC4327154	25468874	10.1093/molbev/msu327	Oxford University Press	Molecular Biology and Evolution	0737-4038, 1537-1719	The Y-chromosome tree bursts into leaf: 13,000 high-confidence SNPs covering the majority of known clades	1740	TRUE			FALSE	cc-by	epmc_xml	hybrid	TRUE	Wellcome Trust	0	0	Wellcome Trust Senior Fellowship, grant number 087576 (Sex, genomes, history: molecular, evolutionary and cultural effects on human genetic diversity)	0	0
PMC4604765	26260110	10.1016/j.mcn.2015.08.001	Elsevier	Molecular and Cellular Neuroscience	1044-7431, 1095-9327	Eye drop delivery of pigment epithelium-derived factor-34 promotes retinal ganglion cell neuroprotection and axon regeneration	1741.64	TRUE			FALSE	cc-by	epmc_xml	hybrid	TRUE	Wellcome Trust	0	0	092539/Z/10/Z	0	0
PMC4366240	25790137	10.1371/journal.pgen.1005053	PLOS	PLOS Genetics	1553-7390, 1553-7404	Phenotype specific analyses reveal distinct regulatory mechanism for chronically activated p53	1742.27	TRUE			FALSE	cc-by	epmc_xml	oa	TRUE	0	0	0	0	0	0
PMC4270692	25522361	10.1371/journal.pntd.0003363	PLOS	PLOS Neglected Tropical Diseases	1935-2727, 1935-2735	Using a non-image-based medium-throughput assay for screening compounds targeting N-myristoylation in intracellular Leishmania amastigotes	1743.34	TRUE			FALSE	cc-by	epmc_xml	oa	TRUE	Wellcome Trust	0	0	087792/Z/08/Z	0	0
PMC4559412	26334635	10.1371/journal.ppat.1005151	PLOS	PLOS Pathogens	1553-7366, 1553-7374	Inhibition of Translation Initiation by Protein 169: A Vaccinia Virus Strategy to Suppress Innate and Adaptive Immunity and Alter Virus Virulence	1746.67	TRUE			FALSE	cc-by	epmc_xml	oa	TRUE	0	0	0	0	0	0
PMC4366040	25661398	10.1016/j.jad.2015.01.024	Elsevier	Journal of Affective Disorders	0165-0327, 1573-2517	Rapid cycling as a feature of bipolar disorder and comorbid migraine	1748.05	TRUE			FALSE	cc-by	epmc_xml	hybrid	TRUE	Wellcome Trust	0	0	78901	0	0
PMC4521134	26174517	10.1093/ije/dyv114	Oxford University Press	International Journal of Epidemiology	0300-5771, 1464-3685	Difficulty in detecting discrepancies in a clinical trial report: 260-reader evaluation	1750	TRUE			FALSE	cc-by	epmc_xml	hybrid	TRUE	BHF			FS/14/27/30752
PMC4492404	25979247	10.1093/hmg/ddv181	Oxford University Press	Human Molecular Genetics	0964-6906, 1460-2083	A microfibril assembly assay identifies different mechanisms of dominance underlying Marfan syndrome, stiff skin syndrome and acromelic dysplasias	1750	TRUE			FALSE	cc-by	epmc_xml	hybrid	TRUE	Arthritis Research UK				20785
PMC4492401	25972375	10.1093/hmg/ddv176	Oxford University Press	Human Molecular Genetics	0964-6906, 1460-2083	Dominant, toxic gain-of-function mutations in gars lead to non-cell autonomous neuropathology	1750	TRUE			FALSE	cc-by	epmc_xml	hybrid	TRUE	Wellcome Trust				HMRZGR00
PMC4512629	26025379	10.1093/hmg/ddv190	Oxford University Press	Human Molecular Genetics	0964-6906, 1460-2083	Genome-wide association study of toxic metals and trace elements reveals novel associations	1750	TRUE			FALSE	cc-by	epmc_xml	hybrid	TRUE	Wellcome Trust	Wellcome Trust	Wellcome Trust		WT098017, WT090532	097306/Z/11/Z
PMC4459391	25855803	10.1093/hmg/ddv117	Oxford University Press	Human Molecular Genetics	0964-6906, 1460-2083	Germline recessive mutations in PI4KA are associated with perisylvian polymicrogyria, cerebellar hypoplasia and arthrogryposis	1750	TRUE			FALSE	cc-by	epmc_xml	hybrid	TRUE	Wellcome Trust				090532/Z/09/Z
PMC4499945	25995293	10.1093/trstmh/trv035	Oxford University Press	Transactions of the Royal Society of Tropical Medicine & Hygiene	0035-9203, 1878-3503	Sickle-cell disease: a call to action	1750	TRUE			FALSE	cc-by	epmc_xml	hybrid	TRUE	Wellcome Trust				053267/Z/98/G
PMC4321448	25361962	10.1093/hmg/ddu555	Oxford University Press	Human Molecular Genetics	0964-6906, 1460-2083	A recurrent CEP120 mutation in Jeune asphyxiating thoracic dystrophy expands the role of centriolar proteins in skeletal ciliopathies	1750	TRUE			FALSE	cc-by	epmc_xml	hybrid	TRUE	Wellcome Trust			WT091310
PMC4382908	25431331	10.1093/bioinformatics/BTU791	Oxford University Press	Bioinformatics	1367-4803, 1367-4811	MetaPSICOV: combining coevolution methods for accurate prediction of contacts and long range hydrogen bonding in proteins	1750	TRUE			FALSE	cc-by	epmc_xml	hybrid	TRUE	Wellcome Trust	BBSRC		096624/Z/11/Z to Tomasz Kosciolek and 096622/Z/11/Z to Stuart Tetchner.	BB/L018330/1
PMC4623854	26516299	10.1093/shm/hkv040	Oxford University Press	Social History of Medicine	0951-631X, 1477-4666	the bones tell a story the child is too young or too frightened to tell': The Battered Child Syndrome in Post-War Britain and America.	1750	TRUE			FALSE	cc-by	epmc_xml	hybrid	TRUE	Wellcome Trust	EPSRC		WT099346MA
PMC4381605	25460505	10.18632/oncotarget.2813	Impact Journals	Oncotarget	1949-2553	DNA damage-induced S and G2/M cell cycle arrest requires mTORC2-dependent regulation of Chk1	1751.2	TRUE			FALSE	cc-by	epmc_xml	hybrid	TRUE	WT
PMC4534465	26267488	10.1371/journal.pgen.1005421	PLOS	PLoS One	1553-7390, 1553-7404	New Routes to Phylogeography: A Bayesian Structured Coalescent Approximation	1751.93	TRUE			FALSE	cc-by	epmc_xml	oa	TRUE	Wellcome Trust				101237/Z/13/Z
PMC4304833	25461817	10.1016/j.ymeth.2014.10.036	Elsevier	Methods	1046-2023, 1095-9130	Probe Lasso: a novel method to rope in differentially methylated regions with 450k DNA methylation data	1752.18	TRUE			FALSE	cc-by	publisher	hybrid	TRUE	Wellcome Trust			115234; WT093855; 282510
PMC4376878	25816228	10.1371/journal.pntd.0003665	PLOS	PLoS Neglected Tropical Diseases	1935-2727, 1935-2735	Genetic Recombination Between Human and Animal Parasites Creates Novel Strains of Human Pathogen	1753.25	TRUE			FALSE	cc-by	epmc_xml	oa	TRUE	Wellcome Trust			WT88099
PMC4504489	26181911	10.1371/journal.ppat.1005034	PLOS	PLoS Pathogens	1553-7366, 1553-7374	Vaccination Drives Changes in Metabolic and Virulence Profiles of Streptococcus pneumoniae	1754.76	TRUE			FALSE	cc-by	epmc_xml	oa	TRUE	Wellcome Trust				096063/Z/11/Z
PMC4392229	25563743	10.1136/jech-2014-20421	BMJ	Journal of Epidemiology & Community Health	0143-005X, 1470-2738	A novel ecological methodology for constructing ethnic-majority life tables in the absence of individual ethnicity information.	1755	TRUE			FALSE	cc-by	epmc_xml	hybrid	TRUE	Cancer Research UK			C23409/A14031
PMC4315808	25305231	10.1016/j.amjmed.2014.10.002	Ecological Society of America	American Journal of Medicine	0002-9343, 1555-7162	Long term adherence to healthy dietary guidelines and chronic inflammation in the prospective Whitehall II Study	1755	TRUE			FALSE	cc-by	epmc_xml	hybrid	TRUE	British Heart Foundation	MRC / ESRC		PG/11/63/29011 and RG/13/2/30098	MR/K013351/1; ES/J023299/1
PMC4378665	25670332	10.1016/j.neurobiolaging.2014.12.039	Elsevier	Neurobiology of Aging	0197-4580, 1558-1497	The effects of an intronic polymorphism in TOMM40 and APOE genotypes in sporadic inclusion body myositis	1755	TRUE			FALSE	cc-by	epmc_xml	hybrid	TRUE	Wellcome Trust	MRC
PMC4481316	26106896	10.1371/journal.pgen.1005272	PLOS	PLOS Genetics	1553-7390, 1553-7404	Dissection of a Complex Disease Susceptibility Region Using a Bayesian Stochastic Search Approach to Fine Mapping	1758.04	TRUE			FALSE	cc-by	epmc_xml	oa	TRUE	0	0	0	0	0	0
PMC4564194	26352587	10.1371/journal.ppat.1005137	PLOS	PLOS Pathogens	1553-7366, 1553-7374	Rapid lymphatic dissemination of encapsulated group A streptococci via lymphatic vessel endothelial receptor-1 interaction	1758.62	TRUE			FALSE	cc-by	epmc_xml	oa	TRUE	WT			103197/Z/13/Z
PMC4562295	0	10.1016/j.mce.2015.07.025	Elsevier	Molecular and Cellular Endocrinology	0303-7207, 1872-8057	Early-life perturbations in glucocorticoid activity impacts on the structure, function and molecular composition of the adult zebrafish (Danio rerio) heart	1760.9	TRUE			FALSE	cc-by	epmc_xml	hybrid	TRUE	British Heart Foundation	0	0	FS/11/78/29328
PMC4270488	0	10.1371/journal.pgen.1004871	PLOS	PLoS Genetics	1553-7390, 1553-7404	Vangl2-regulated polarisation of second heart field-derived cells is required for outflow tract lengthening during cardiac development.	1761.26	TRUE			FALSE	cc-by	epmc_xml	oa	TRUE	British Heart Foundation	0	0	PG/11/76/29108	0	0
PMC4335459	25671699	10.1371/journal.pgen.1004955	PLOS	PLoS genetics	1553-7390, 1553-7404	Pooled sequencing of 531 genes in inflammatory bowel disease identifies an associated rare variant in <i>BTNL2</i> and implicates other immune related genes.	1761.95	TRUE			FALSE	cc-by	epmc_xml	oa	TRUE	Wellcome Trust			094491/Z/10/Z
PMC4589553	26358583	10.1007/s00125-015-3735-0	Springer	Diabetologia	0012-186X, 1432-0428	Sensory neuropathy hampers nociception-mediated bone marrow stem cell release in mice and patients with diabetes	1762.61	TRUE			FALSE	cc-by	epmc_xml	hybrid	TRUE	British Heart Foundation	MRC		RJ5905	MR/J002593/1
PMC4596899	26387087	10.1007/s10552-015-0654-9	Springer	Cancer Causes & Control	0957-5243, 1573-7225	The effects of height and BMI on prostate cancer incidence and mortality: a Mendelian randomization study in 20,848 cases and 20,214 controls from the PRACTICAL consortium	1762.61	TRUE			FALSE	cc-by	epmc_xml	hybrid	TRUE	MRC	Cancer Research UK		MC_UU_12013/1,9	C18281/A19169
PMC4447278	26020779	10.1371/journal.pgen.1005261	PLOS	PLoS Genetics	1553-7390, 1553-7404	Dissecting the function and assembly of acentriolar microtubule organizing centers in Drosophila cells in vivo	1763.09	TRUE			FALSE	cc-by	epmc_xml	oa	TRUE	Wellcome Trust				104575/Z/14/Z
PMC4473215	25903575	10.1128/JCM.00378-15	American Society for Mircrobiology	Journal of Clinical Microbiology	0095-1137, 1098-660X	Extensive within-host diversity in fecally carried extended-spectrum beta-lactamase-producing Escherichia coli Isolates: implications for transmission analyses	1764.12	TRUE			FALSE	cc-by	epmc_xml	hybrid	TRUE	Wellcome Trust				099423/Z/12/Z
PMC4473186	25972423	10.1128/JCM.00744-15	American Society for Mircrobiology	Journal of Clinical Microbiology	0095-1137, 1098-660X	Genomics Reveals the Worldwide Distribution of Multidrug-Resistant Serotype 6E Pneumococci	1764.12	TRUE			FALSE	cc-by	epmc_xml	hybrid	TRUE	Wellcome Trust				083511/Z/07/Z
PMC4386929	25698230	10.1016/j.jtbi.2015.01.037	Elsevier	Journal of Theoretical Biology	0022-5193, 1095-8541	Modelling the vascular response to sympathetic postganglionic nerve activity	1764.32	TRUE			FALSE	cc-by	epmc_xml	hybrid	TRUE	Wellcome Trust	British Heart Foundation		WT088373	BHF PG/06/084
PMC4463976	25812717	10.1016/j.neuroimage.2015.03.005	Elsevier	NeuroImage	1053-8119, 1095-9572	Fast and powerful heritability inference for family-based neuroimaging studies	1768.8	TRUE			FALSE	cc-by	epmc_xml	hybrid	TRUE	Wellcome Trust	NIH		100309/Z/12/Z
PMC4148183	25001495	10.1016/j.jmbbm.2014.06.005	Elsevier	Journal of the Mechanical Behavior of Biomedical Materials	1751-6161, 1878-0180	Early stage fatigue damage occurs in bovine tendon fascicles in the absence of changes in mechanics at either the gross or micro-structural level	1774.57	TRUE			FALSE	cc-by	publisher	hybrid	TRUE	Wellcome Trust			087112/Z/08/Z
PMC4368512	0	10.1371/journal.pcbi.1004146	PLOS	PLOS Computational Biology	1553-734X, 1553-7358	symmetric Genome Organization in an RNA Virus Revealed via Graph-Theoretical Analysis of Tomographic Data	1779.51	TRUE			FALSE	cc-by	epmc_xml	oa	TRUE	Wellcome Trust	0	0	097326/Z/11/Z	0	0
PMC4298668	25488826	10.1007/s10552-014-0500-5	Springer	Cancer Causes & Control	0957-5243, 1573-7225	Associations of vitamin D pathway genes with circulating 25-hydroxyvitamin-D, 1,25-dihydroxyvitamin-D, and prostate cancer: a nested caseâ€“control study	1782	TRUE			FALSE	cc-by	epmc_xml	hybrid	TRUE	MRC	Cancer Research UK	Wellcome Trust	G0500966	C31211/A10095	WT083431MA
PMC4282723	25457149	10.1016/j.jaci.2014.10.007	Elsevier	Journal of Allergy & Clinical Immunology	0091-6749, 1097-6825	Atopic dermatitis increases the effect of exposure to peanut antigen in dust on peanut sensitization and likely peanut allergy.	1783.84	TRUE			FALSE	cc-by	epmc_xml	hybrid	TRUE	Wellcome Trust				098439/Z/12/Z
PMC4382348	25618747	10.1016/j.jaci.2014.12.013	Elsevier	Journal of Allergy & Clinical Immunology	0091-6749, 1097-6825	Skin barrier dysfunction measured by transepidermal water loss at 2 days and 2 months predates and predicts atopic dermatitis at 1 year.	1783.84	TRUE			FALSE	cc-by	epmc_xml	hybrid	TRUE	Wellcome Trust				090066/B/09/Z	092531/Z/10/Z
PMC4635486	25667330	10.1099/vir.0.000084	Society for General Microbiology	Journal of General Virology	0022-1317, 1465-2099	Genotyping coronaviruses associated with feline infectious peritonitis	1785	TRUE			FALSE	cc-by	epmc_xml	hybrid	TRUE	Wellcome Trust			WT104387
PMC4298679	25351724	10.1099/vir.0.069591-0	Society for General Microbiology	Journal of General Virology	0022-1317, 1465-2099	A role for vaccinia virus protein C16 in reprogramming cellular energy metabolism	1785	TRUE			FALSE	cc-by	epmc_xml	hybrid	TRUE	0	0	0	0	0	0
PMC4681060	25904147	10.1099/vir.0.000155	Society for General Microbiology	Journal of General Virology	0022-1317, 1465-2099	Influenza A virus evolution and spatio-temporal dynamics in Eurasian Wild Birds: A phylogenetic and phylogeographic study of whole-genome sequence data	1785	TRUE			FALSE	cc-by	epmc_xml	hybrid	TRUE	0	0	0	0	0	0
PMC4635454	25740960	10.1099/vir.0.000113	Society for General Virology	Journal of General Virology	0022-1317, 1465-2099	Physicochemical requirements and kinetics of membrane fusion of flavivirus-like particles	1785	TRUE			FALSE	cc-by	epmc_xml	hybrid	TRUE	0	0	0	0	0	0
PMC4635451	25735305	10.1099/vir.0.000108	Society for General Microbiology	Journal of General Virology	0022-1317, 1465-2099	A genetic analysis of the Oropouche virus species and identification of a novel M segment	1785	TRUE			FALSE	cc-by	epmc_xml	hybrid	TRUE	Wellcome Trust			099220/B/12/Z
PMC4361796	25535323	10.1099/vir.0.000035	Society for General Microbiology	Journal of General Virology	0022-1317, 1465-2099	Rapid evolution of the env gene leader sequence in cats naturally infected with feline immunodeficiency virus (FIV)	1785	TRUE			FALSE	cc-by	epmc_xml	hybrid	TRUE	Wellcome Trust			WT088486MA
PMC4635489	25626684	10.1099/vir.0.000071	Microbiology Society	Journal of General Virology	0022-1317, 1465-2099	Discovery of a polyomavirus in European Badgers (Meles meles) and the evolution of host range in the Polyomaviridae	1785	TRUE			FALSE	cc-by	epmc_xml	hybrid	TRUE	Wellcome Trust				102427/Z/13/Z
PMC4464011	25228294	10.1159/000366323	Karger	Cellular physiology and biochemistry	1015-8987, 1421-9778	Switching Back to Normal Diet Following High-Fat Diet Feeding Reduces Cardiac Vulnerability to Ischaemia and Reperfusion Injury	1788.38	TRUE			FALSE	cc-by	epmc_xml	oa	TRUE	British Heart Foundation			FS/11/57/28936
PMC4308924	25649125	10.1186/s13073-014-0120-4		Genome medicine	1756-994X	Bayesian models for syndrome- and gene-specific probabilities of novel variant pathogenicity	1788.9	TRUE			FALSE	cc-by	epmc_xml	hybrid	TRUE	The Academy of Medical Sciences; British Heart Foundation			G1000758-E01/2; SP/10/10/28431
PMC4256740	25484919	10.1186/s13073-014-0099-x	BioMed Central	Genome Medicine	1756-994X	The conjunctival microbiome in health and trachomatous disease.	1788.9	TRUE			FALSE	cc-by	epmc_xml	hybrid	TRUE	Wellcome Trust			WT0933681/Z/10/Z
PMC4383555	25838181	10.1371/journal.pgen.1005058	PLOS	P L o S Genetics	1553-7390, 1553-7404	The Lowe syndrome protein OCRL1 is required for endocytosis in the zebrafish pronephric tubule	1792.74	TRUE			FALSE	cc-by	epmc_xml	oa	TRUE
PMC4464526	26061527	10.1371/journal.pntd.0003756	PLOS	PLoS Neglected Tropical Diseases	1935-2727, 1935-2735	Prioritising Infectious Disease Mapping	1793.74	TRUE			FALSE	cc-by	epmc_xml	oa	TRUE	Wellcome Trust				95066
PMC4004449	24758143	10.1186/1479-5868-11-54	BioMed Central	International Journal of Behavioral Nutrition and Physical Activity	1479-5868	Cross-sectional associations between the screen time of parents and young children: differences by parent and child gender and day of the week	1794	TRUE			FALSE	cc-by	epmc_xml	oa	TRUE	British Heart Foundation			PG/11/51/28986
PMC4537551	0	10.1186/s12966-015-0260-y	BioMed Central	International Journal of Behavioral Nutrition and Physical Activity	1479-5868	An assessment of the relevance of the home neighbourhood for understanding environmental influences on physical activity: How far from home do people roam?	1794	TRUE			FALSE	cc-by	epmc_xml	oa	TRUE	Wellcome Trust	0	0	WT086895/Z08/Z	0	0
PMC4524371	26239227	10.1186/s12974-015-0359-8	Biomed Central	Journal of Neuroinflammation	1742-2094	Prolonged diet-Induced obesity in mice modifies the inflammatory response and leads to worse outcome after stroke	1794	TRUE			FALSE	cc-by	epmc_xml	oa	TRUE
PMC4376896	25815506	10.1371/journal.ppat.1004765	PLOS	PLOS Pathogens	1553-7366, 1553-7374	Exome and Transcriptome Sequencing of Aedes aegypti Identifies a Locus That Confers Resistance to Brugia malayi and Alters the Immune Response	1794.14	TRUE			FALSE	cc-by	epmc_xml	oa	TRUE	0	0	0	0	0	0
PMC4286102	25060092	10.1111/febs.12944	Wiley	FEBS Journal	1742-464X, 1742-4658	Met1-linked ubiquitination in immune signalling	1795.44	TRUE			FALSE	cc-by	epmc_xml	hybrid	TRUE	Wellcome Trust				102894
PMC4390160	25676335	10.1016/j.jpsychores.2015.01.015	Elsevier	Journal of PsychosomaticÂ Research	0022-3999, 1879-1360	Patterns of somatic distress among conflict-affected persons in the Republic of Georgia.	1798.83	TRUE			FALSE	cc-by	epmc_xml	hybrid	TRUE	Wellcome Trust			WT093562/Z/10/Z
PMC4324242	25346172	10.1111/cmi.12388	Wiley	Cellular Microbiology	2150-7511	Candida albicans colonization and dissemination from the murine gastrointestinal tract: the influence of morphology and Th17 immunity	1800	TRUE			FALSE	cc-by	epmc_xml	oa	TRUE	Wellcome	0	0	086558, 97377, 102705	0	0
PMC4370213	25815060	10.1093/phe/phu046	Oxford University Press	Public Health Ethics	1754-9973, 1754-9981	The Restaurant Food Hot Potato: Stop Passing it on. A Commentary on Mah and Timmingâ€™s, â€˜Equity in Public Health Ethics: The Case of Menu Labelling Policy at the Local Levelâ€™	1800	TRUE			FALSE	cc-by	epmc_xml	hybrid	TRUE	Wellcome Trust	0	0	WT104894MA	0	0
PMC4524417	26062886	10.1002/cbic.201500120	Wiley	ChemBioChem	1439-4227, 1439-7633	Accessible synthetic probes to stain actin inside platelets and megakaryocytes employing Lifeact peptide	1800	TRUE			FALSE	cc-by	epmc_xml	hybrid	TRUE	British Heart Foundation	0	0	NH/11/6/29061	0	0
PMC4008987	24547915	10.1111/cei.12297	Wiley	Clinical & Experimental Immunology	0009-9104, 1365-2249	Cytomegalovirus drives V?2neg ?? T cell inflation in many healthy virus carriers with increasing age	1800	TRUE			FALSE	cc-by	publisher	hybrid	TRUE	Wellcome Trust	0	0	078660/Z/05/Z	0	0
PMC4500370	25754766	10.1111/bph.13122	Wiley	British Journal of Pharmacology	0007-1188, 1476-5381	Role of aldehyde dehydrogenase in hypoxic vasodilator effects of nitrite in rats and humans	1800	TRUE			FALSE	cc-by	epmc_xml	hybrid	TRUE	British Heart Foundation	0	0	FS/10/030/28261	0	0
PMC4328456	25627134	10.1002/bjs.9722	Wiley	British Journal of Surgery	0007-1323, 1365-2168	Surgery in the era of the â€˜omics revolution	1800	TRUE			FALSE	cc-by	epmc_xml	hybrid	TRUE	Wellcome Trust	0	0	102732/Z/13/Z	0	0
PMC4405050	25488831	10.1111/add.12827	Wiley	Addiction	0965-2140, 1360-0443	Adolescent Cannabis and Tobacco use and Educational Outcomes at Age 16: Birth Cohort Study	1800	TRUE			FALSE	cc-by	epmc_xml	hybrid	TRUE	MRC	Wellcome Trust		G08006 12	WT086684
PMC4690513	25989709	10.1111/ppe.12193	Wiley	Pediatric & Perinatal Epidemiology	0269-5022, 1365-3016	Birthweight and childhood cancer: preliminary findings from the International Childhood Cancer Cohort Consortium (I4C)	1800	TRUE			FALSE	cc-by	epmc_xml	hybrid	TRUE	MRC	Wellcome Trust		WT102215/2/13/2
PMC4540657	25761963	10.1002/jbmr.2506	Wiley	Journal of Bone and Mineral Research	0884-0431, 1523-4681	Maternal preeclampsia is associated with reduced adolescent off-spring hip bone mineral density in a UK population based birth cohort	1800	TRUE			FALSE	cc-by	epmc_xml	hybrid	TRUE	MRC	Wellcome Trust		MR/K024973/1	WT092731	WT84632
PMC4539599	25494867	10.1111/jne.12247	Wiley	Journal of Neuroendocrinology	0953-8194, 1365-2826	The importance of biological oscillators for Hypothalamic Pituitary Adrenal activity and tissue glucocorticoid response: Coordinating stress and neurobehavioural adaption	1800	TRUE			FALSE	cc-by	epmc_xml	hybrid	TRUE	MRC	Wellcome Trust
PMC4305205	25382280	10.1002/sim.6358	Wiley	Statistics in Medicine	0277-6715, 1097-0258	The Many Weak Instruments Problem and Mendelian Randomization	1800	TRUE			FALSE	cc-by	epmc_xml	hybrid	TRUE	MRC	Wellcome Trust		MC_UU_12013/1-9	G0600705	WT100114
PMC4539596	25353930	10.1111/mmi.12843	Wiley	Molecular Microbiology	0950-382X, 1365-2958	Three-dimensional electron microscopy reconstruction and cysteine-mediated crosslinking provide a model of the T3SS needle tip complex	1800	TRUE			FALSE	cc-by	epmc_xml	hybrid	TRUE	MRC	Wellcome Trust		G0701243	MRJ002097	WT82398
PMC4209782	25177796	10.1042/BJ20140889	Portland Press	Biochemical Journal	0264-6021, 1470-8728	Characterization of VPS34-IN1, a selective inhibitor of Vps34, reveals that the phosphatidylinositol 3-phosphate-binding SGK3 protein kinase is a downstream target of class III phosphoinositide 3-kinase.	1800	TRUE			FALSE	cc-by	epmc_xml	hybrid	TRUE	Wellcome Trust				097945/Z/11/Z
PMC4243253	24942958	10.1042/BJ20140511	Portland Press	Biochemical Journal	0264-6021, 1470-8728	Structures of bacterial kynurenine formamidase reveal a crowded binuclear zinc catalytic site primed to generate a potent nucleophile	1800	TRUE			FALSE	cc-by	epmc_xml	hybrid	TRUE	Wellcome Trust				82596	100476
PMC4613535	25891802	10.1042/BJ20141523	Portland Press	Biochemical Journal	0264-6021, 1470-8728	Suppression of interferon ? gene transcription by inhibitors of bromodomain and extra-terminal (BET) family members.	1800	TRUE			FALSE	cc-by	epmc_xml	hybrid	TRUE	Wellcome Trust				100294/Z/12/Z
PMC4403949	25886174	10.1042/BJ20141450	Portland Press	Biochemical Journal	0264-6021, 1470-8728	Targeting Cullin-RING E3 ubiquitin ligases for drug discovery: structure, assembly and small-molecule modulation.	1800	TRUE			FALSE	cc-by	epmc_xml	hybrid	TRUE	Wellcome Trust				100476/Z/12/Z
PMC4286194	25351958	10.1042/BJ20141165	Portland Press	Biochemical Journal	0264-6021, 1470-8728	The clinically-approved drugs Dasatinib and Bosutinib induce anti-inflammatory macrophages by inhibiting the Salt-Inducible Kinases	1800	TRUE			FALSE	cc-by	epmc_xml	hybrid	TRUE	Wellcome Trust				097945/Z/11/Z
PMC4353193	25489924	10.1042/BJ20141349	Portland Press	Biochemical Journal	0264-6021, 1470-8728	Ubiquitin C-terminal hydrolases cleave isopeptide- and peptide-linked ubiquitin from structured proteins but do not edit ubiquitin homopolymers	1800	TRUE			FALSE	cc-by	epmc_xml	hybrid	TRUE	Wellcome Trust				098391/Z12/Z
PMC4613501	26318523	10.1042/BJ20150068	Portland Press	Biochemical Journal	0264-6021, 1470-8728	Diversity in the structures and ligand binding sites of nematode fatty acid and retinol binding proteins revealed by Na-FAR-1 from Necator americanus	1800	TRUE			FALSE	cc-by	epmc_xml	hybrid	TRUE	Wellcome Trust			083625/Z/07/Z
PMC4243250	24758166	10.1042/BJ20140234	Portland Press	Biochemical Journal	0264-6021, 1470-8728	Inactivation of Mammalian Ero1? is catalysed by Specific Protein Disulfide Isomerases	1800	TRUE			FALSE	cc-by	epmc_xml	hybrid	TRUE	Wellcome Trust			62593
PMC4613521	0	10.1042/CS20140705	Portland Press	Clinical Science	0143-5221, 1470-8736	Novel MTND1 mutations cause isolated exercise intolerance, complex I deficiency and increased assembly factor expression	1800	TRUE			FALSE	cc-by	epmc_xml	hybrid	TRUE	Wellcome Trust	0	0	096919/Z/11/Z	0	0
PMC4668330	26318852	10.1093/eurpub/ckv151	Oxford University Press	European Journal of Public Health	1101-1262, 1464-360X	How do Economic Crises Affect Migrants' Risks of Infectious Disease? A systematic-narrative review	1800	TRUE			FALSE	cc-by	epmc_xml	hybrid	TRUE	Wellcome Trust				100709/Z/12/Z
PMC4440451	25999461	10.1093/eurpub/ckv040	Oxford University Press	European Journal of Public Health	1101-1262, 1464-360X	The attack on universal health coverage in Europe: recession, austerity and unmet needs.	1800	TRUE			FALSE	cc-by	epmc_xml	hybrid	TRUE	Wellcome Trust				100709
PMC4613530	0	10.1042/BJ20140959	Portland Press	Biochemical Journal	0264-6021, 1470-8728	Structure-based Design and Functional studies of Novel Noroviral 3C Protease Chimeras Offers Insights into Substrate Specificity	1800	TRUE			FALSE	cc-by	epmc_xml	hybrid	TRUE	Wellcome Trust			86112
PMC4526482	25691777	10.1093/scan/nsu161	Oxford University Press	Social Cognitive and Affective Neuroscience	1749-5016, 1749-5024	Linking differences in action perception with differences in action execution.	1800	TRUE			FALSE	cc-by	epmc_xml	hybrid	TRUE	Wellcome Trust			WT081048MA
PMC4431825	0	10.1371/journal. pgen.1005040	PLOS	PLoS Genetics	1553-7390, 1553-7404	Extreme-depth re-sequencing of mitochondrial DNA finds no evidence of paternal transmission in humans	1803.25	TRUE			FALSE	cc-by	epmc_xml	oa	TRUE	Wellcome Trust	0	0	101876/Z/13/Z	0	0
PMC4412112	25654642	10.1371/journal.ppat.1004641	PLOS	PLoS Pathogens	1553-7366, 1553-7374	CD200 receptor restriction of myeloid cell responses antagonizes antiviral immunity and facilitates cytomegalovirus persistence within mucosal tissue	1805.41	TRUE			FALSE	cc-by	epmc_xml	oa	TRUE	Wellcome Trust			WT098026MA
PMC4346270	25729859	10.1371/journal.pcbi.1004123	PLOS	PLoS Computational Biology	1553-734X, 1553-7358	Molecular Dynamics Simulations of the Bacterial UraA H+-Uracil Symporter in Lipid Bilayers Reveal a Closed state and a Selective Interaction with Cardiolipin	1805.68	TRUE			FALSE	cc-by	epmc_xml	oa	TRUE	Wellcome Trust				92970
PMC4383549	25835000	10.1371/journal.pgen.1005061	PLOS	PLoS Genetics	1553-7390, 1553-7404	Lipid-Induced Epigenomic Changes in Human Macrophages Identify a Coronary Artery Disease-Associated Variant that Regulates PPAP2B Expression through Altered C/EBP-Beta Binding	1806.28	TRUE			FALSE	cc-by	epmc_xml	oa	TRUE	Wellcome Trust	Wellcome Trust			097089/Z/11/Z	090532/Z/09/Z
PMC4402531	0	10.1093/nar/gkv211	Oxford University Press	Nucleic Acids Research	0305-1048, 1362-4962	Invadolysin acts genetically via the SAGA complex to modulate chromosome structure	1812	TRUE			FALSE	cc-by	epmc_xml	oa	TRUE	Wellcome Trust	British Heart Foundation	0	G33317
PMC4190646	24782340	10.1002/bies.201400019	Wiley	BioEssays	0265-9247, 1521-1878	Keeping your armour intact: how HIV-1 evades detection by the innate immune system: HIV-1 capsid controls detection of reverse transcription products by the cytosolic DNA sensor cGAS	1815.98	TRUE			FALSE	cc-by	epmc_xml	hybrid	TRUE	Wellcome Trust				100954
PMC4223357	0	10.1074/jbc.M114.583542	American Society for Biochemistry	Journal of Biological Chemistry	0021-9258, 1083-351X	Auxin-induced rapid degradation of inhibitor of caspase-activated DNase (ICAD) induces apoptotic DNA fragmentation, caspase activation, and cell death: a cell suicide module	1818.14	TRUE			FALSE	cc-by	epmc_xml	hybrid	TRUE	Wellcome Trust	0	0	077707 and 092076
PMC4405193	25897492	10.1371/journal.pntd.0003688	PLOS	PLoS Neglected Tropical Diseases	1935-2727, 1935-2735	Onchocerciasis Transmission in Ghana: Persistence under Different Control Strategies and the Role of the Simuliid Vectors	1818.8	TRUE			FALSE	cc-by	epmc_xml	oa	TRUE	WT			097816/Z/11/Z
PMC4600471	25963561	10.1007/s00213-015-3949-3	Springer	Psychopharmacology	0033-3158, 1432-2072	The role of the dorsal hippocampus in two versions of the touchscreen automated paired associates learning (PAL) task for mice	1818.82	TRUE			FALSE	cc-by	epmc_xml	hybrid	TRUE	0	0	0	0	0	0
PMC4397069	25875600	10.1371/journal.ppat.1004811	PLOS	PLOS Pathogens	1553-7366, 1553-7374	Plasma Membrane Profiling Defines an Expanded Class of Cell Surface Proteins Selectively Targeted for Degradation by HCMV US2 in Cooperation with UL141	1819.9	TRUE			FALSE	cc-by	epmc_xml	oa	TRUE	0	0	0	0	0	0
PMC4374809	25811365	10.1371/journal.pgen.1005078	PLOS	PLOS Genetics	1553-7390, 1553-7404	Tertiary siRNAs Mediate Paramutation in C. elegans	1819.9	TRUE			FALSE	cc-by	epmc_xml	oa	TRUE	0	0	0	0	0	0
PMC4253618	25406733	10.1186/s12966-014-0142-8	BioMed Central	International Journal of Behavioral Nutrition and Physical Activity	1479-5868	Evaluating causal relationships between urban built environment characteristics and 2 obesity a methodological review of observational studies	1824	TRUE			FALSE	cc-by	epmc_xml	oa	TRUE	0	0	0	0	0	0
PMC4407972	25906071	10.1371/journal.pgen.1005165	PLOS	PLoS Genetics	1553-7390, 1553-7404	The Power of Gene-Based Rare Variant Methods to Detect Disease-Associated Variation and Test Hypotheses About Complex Disease	1824.49	TRUE			FALSE	cc-by	epmc_xml	oa	TRUE	Wellcome Trust	Wellcome Trust	Wellcome Trust		90367	98381
PMC4390200	25853653	10.1371/journal.ppat.1004754	PLOS	PLoS Pathogens	1553-7366, 1553-7374	Cerebrospinal Fluid Cytokine Profiles Predict Risk of Early Mortality and Immune Reconstitution Inflammatory Syndrome in HIV-Associated Cryptococcal Meningitis	1824.88	TRUE			FALSE	cc-by	epmc_xml	oa	TRUE	WT
PMC4330400	0	10.1016/j.medengphy.2014.12.008	Elsevier	Medical Engineering and Physics	1350-4533, 1873-4030	Principal component analysis of atrial fibrillation: inclusion of posterior ECG leads does not improve correlation with left atrial activity	1825.72	TRUE			FALSE	cc-by	epmc_xml	hybrid	TRUE	British Heart Foundation	0	0	FS/11/47/28867	0	0
PMC4431738	25974019	10.1371/journal.ppat.1004841	PLOS	PLOS Pathogens	1553-7366, 1553-7374	Helminth Infection and Commensal Microbiota Drive Early IL-10 Production in the Skin by CD4+ T Cells That Are Functionally Suppressive	1826.27	TRUE			FALSE	cc-by	epmc_xml	oa	TRUE	Wellcome Trust	0	0	092745/Z/10/Z	0	0
PMC4339652	0	10.1099/mic.0.000024	Society for General Microbiology	Microbiology	1350-0872, 1465-2080	The antibacterial toxin Colicin N and the phage protein G3P compete with TolB for a binding site on TolA	1829.6	TRUE			FALSE	cc-by	epmc_xml	hybrid	TRUE	Wellcome Trust	0	0	093581/Z/10/Z	0	0
PMC4339242	25712590	10.7448/IAS.18.1.19247	Co-Action Publishing	Journal of the International AIDS Society	1758-2652	Risk of death among those awaiting treatment for HIV Infection.	1830.65	TRUE			FALSE	cc-by	epmc_xml	oa	TRUE	Wellcome Trust			WT0958781/11/Z
PMC4471624	25676849	10.1002/cbic.201500013	Wiley	ChemBioChem	1439-4227, 1439-7633	Formation and Abundance of 5-Hydroxymethylcytosine in RNA	1832.26	TRUE			FALSE	cc-by	epmc_xml	hybrid	TRUE	0	0	0	0	0	0
PMC4284101	25256604	10.1002/cbic.201402439	Wiley	ChemBioChem	1439-4227, 1439-7633	Targeting DNA G-Quadruplexes with Helical Small Molecules	1832.26	TRUE			FALSE	cc-by	epmc_xml	hybrid	TRUE	0	0	0	0	0	0
PMC4571925	26051918	10.1016/j.exphem.2015.05.006	Elsevier	Experimental Hematology	0301-472X, 1873-2399	Index sorting resolves heterogeneous murine hematopoietic stemÂ cellÂ populations	1832.63	TRUE			FALSE	cc-by	epmc_xml	hybrid	TRUE	0	0	0	0	0	0
PMC4288951	25404069	10.4269/ajtmh.14-0446	Sheridan Press	American Journal of Tropical Medicine and Hygiene	0002-9637, 1476-1645	Epidemiology and individual, household and geographical risk factors of podoconiosis in Ethiopia: results from the first nationwide mapping	1837.67	TRUE			FALSE	cc-by	epmc_xml	hybrid	TRUE	Wellcome Trust			WT PHATIC fellowship (number 099876)
PMC4596252	26101162	10.1016/j.exphem.2015.06.002	Elsevier	Experimental Haematology	0301-472X, 1873-2399	CRISPR-mediated genotypic and phenotypic correction of a chronic granulomatous disease mutation in human iPS cells	1838.28	TRUE			FALSE	cc-by	epmc_xml	hybrid	TRUE	Wellcome Trust				WT155121302
PMC4497351	25250867	10.1111/ajt.12899	Wiley	American Journal of Transplantation	1600-6135, 1600-6143	Demethylation of the TSDR Is a Marker of Squamous Cell Carcinoma in Transplant Recipients	1840.03	TRUE			FALSE	cc-by	epmc_xml	hybrid	TRUE	Wellcome Trust				082519/Z/07/Z
PMC4503222	25920944	10.1016/j.jclinepi.2015.03.014	Elsevier	Journal of Clincal Epidemiology	0895-4356, 1878-5921	Professionally designed information materials and telephone reminders improved consent response rates: evidence from an RCT nested within a cohort study	1840.06	TRUE			FALSE	cc-by	epmc_xml	hybrid	TRUE	Wellcome Trust	MRC		WT092731	WT086118/Z08Z
PMC4511413	26196151	10.1371/journal.pmed.1001854	PLOS	PLOS Medicine	1549-1277, 1549-1676	Glitazone treatment and incidence of Parkinson's disease among people with diabetes: a retrospective	1843.03	TRUE			FALSE	cc-by	epmc_xml	oa	TRUE	Wellcome Trust			WT098504/Z/12/Z
PMC4450050	25658688	10.1371/journal.pgen.1004926	PLOS	PLOS Genetics	1553-7390, 1553-7404	A Pleiotropy-Informed Bayesian False Discovery Rate Adapted to a Shared Control Design Finds New Disease Associations From GWAS Summary Statistics	1845.02	TRUE			FALSE	cc-by	epmc_xml	oa	TRUE	0	0	0	0	0	0
PMC4347020	24547807	10.1111/bioe.12082	Wiley	Bioethics	0269-9702, 1467-8519	Autonomy, Natality and Freedom: A Liberal Re-examination of Habermas in the Enhancement Debate	1847.81	TRUE			FALSE	cc-by	epmc_xml	hybrid	TRUE	Wellcome Trust				86041
PMC4196769	0	10.1016/j.talanta.2014.07.087	Elsevier	Talanta	0039-9140, 1873-3573	Simultaneous pharmacokinetic and pharmacodynamic analysis of 5?-reductase inhibitors and androgens by liquid chromatography tandem mass spectrometry	1851.76	TRUE			FALSE	cc-by	publisher	hybrid	TRUE	Wellcome Trust	0	0	090937/Z/09/Z
PMC4368198	0	10.1371/journal.pntd.0003649	PLOS	PLOS Neglected Tropical Diseases	1935-2727, 1935-2735	Identifying and evaluating field indicators of urogenital schistosomiasis-related morbidity in preschool-aged children	1856.23	TRUE			FALSE	cc-by	epmc_xml	oa	TRUE	Wellcome Trust	0	0	095831/Z/11/Z
PMC4460787	26060509	10.1186/s13039-015-0148-1	BioMed Central	Molecular Cytogenetics	1755-8166	Language impairment in a case of a complex chromosomal rearrangement with a breakpoint downstream of FOXP2	1857.6	TRUE			FALSE	cc-by	epmc_xml	oa	TRUE	Wellcome Trust				090532/Z/09/Z
PMC4552774	26141169	10.1007/s40656-015-0072-z	Springer	History and Philosophy of the Life Sciences	0391-9714, 1742-6316	Big Science' in the Field: experimenting with badgers and bovine TB, 1995-2015	1857.61	TRUE			FALSE	cc-by	epmc_xml	hybrid	TRUE	Wellcome Trust			101540/Z/13/Z
PMC4496774	25900181	10.1530/erc-15-0108	Bioscientifica	Endocrine Related Cancer	1351-0088, 1479-6821	Epigenetic dysregulation and poorer prognosis in DAXX-deficient pancreatic neuroendocrine tumours	1860	TRUE			FALSE	cc-by	epmc_xml	hybrid	TRUE	Wellcome Trust / Cancer Research UK
PMC4473082	25944371	10.1007/s00125-015-3572-1	Springer	Diabetologia	0012-186X, 1432-0428	Prospective associations and population impact of sweet beverage intake and type 2 diabetes, and effects of substitutions with alternative beverages	1863.1	TRUE			FALSE	cc-by	epmc_xml	hybrid	TRUE	0	0	0	0	0	0
PMC4491874	26025256	10.1186/s13059-015-0672-7	BioMed Central	Genome Biology	1474-7596, 1474-760X	Allele-specific binding of ZFP57 in the epigenetic regulation of imprinted and non-imprinted monoallelic expression	1865.4	TRUE			FALSE	cc-by	epmc_xml	oa	TRUE	0	0	0	0	0	0
PMC4492089	26100407	10.1186/s13059-015-0696-z	BioMed Central	Genome Biology	1474-7596, 1474-760X	FOXM1 binds directly to non-consensus sequences in the human genome	1865.4	TRUE			FALSE	cc-by	epmc_xml	oa	TRUE	0	0	0	0	0	0
PMC4557825	26330083	10.1186/s13073-015-0212-9	BioMed Central	Genome Medicine	1756-994X	Exploring the cellular basis of human disease through a large-scale mapping of deleterious genes to cell types	1865.4	TRUE			FALSE	cc-by	epmc_xml	hybrid	TRUE	BHF			RE/08/002
PMC4425945	25511448	10.1016/j.math.2014.11.008	Elsevier	Manual Therapy	1356-689X, 1532-2769	Clinical Challenges of Classification Based Targeted Therapies for Non-specific Low Back Pain: What Do Physiotherapy Practitioners and Managers Think?	1867	TRUE			FALSE	cc-by	epmc_xml	hybrid	TRUE
PMC4562710	26348035	10.1371/journal.pmed.1001873	PLOS	PLOS Medicine	1549-1277, 1549-1676	Uptake accuracy safety and linkage into care over two years of promoting annual self-testing.	1869.64	TRUE			FALSE	cc-by	epmc_xml	oa	TRUE	Wellcome Trust			WT091769/Z/10/C
PMC4636986	26179955	10.1007/s10557-015-6609-2	Springer	Cardiovascular Drugs and Therapy	0920-3206, 1573-7241	Cardioprotective Properties of the Platelet P2Y 12 Receptor Inhibitor, Cangrelor: Protective in Diabetics and Reliant Upon the Presence of Blood	1871.53	TRUE			FALSE	cc-by	epmc_xml	hybrid	TRUE	British Heart Foundation	MRC		RG/08/015/26411; PG/09/106	MR/L002043/1
PMC4315137	25528079	10.1016/j.jneb.2014.11.001	Elsevier	Journal of Nutrition Education and Behavior	1499-4046, 1878-2620	Potential population-level nutritional impact of replacing whole and reduced fat milk with low-fat and skim milk among US children age 2-19y	1871.68	TRUE			FALSE	cc-by	epmc_xml	hybrid	TRUE	0	0	0	0	0	0
PMC4536279	25739341	10.1007/s00467-015-3067-9	Springer	Pediatric Nephrology	0931-041X, 1432-198X	Coinheritance of COL4A5 and MYO1E mutations accentuate severity of kidney disease.	1872.8	TRUE			FALSE	cc-by	epmc_xml	hybrid	TRUE
PMC4284308	25524791	10.1016/j.jaac.2014.10.006	Elsevier	Journal of the American Academy of Child and Adolescent Psychiatry	0890-8567, 1527-5418	Treatment of Children with Attention Deficit Hyperactivity Disorder (ADHD) and Irritability: Results from the Multimodal Treatment Study of Children with ADHD (MTA)	1873	TRUE			FALSE	cc-by	epmc_xml	hybrid	TRUE	Wellcome Trust			WT093909
PMC4636589	26162415	10.1007/s10162-015-0533-9	Springer	J A R O	1525-3961, 1438-7573	Specificity of the human frequency following response for carrier and modulation frequency assessed using adaptation	1873.68	TRUE			FALSE	cc-by	epmc_xml	hybrid	TRUE
PMC4465664	25411127	10.1007/s10802-014-9960-z	Springer	Journal of Abnormal Child Psychology	0091-0627, 1573-2835	Early Childhood Father Absence and Depressive Symptoms in Adolescent Girls from a UK Cohort: the Mediating Role of Early Menarche	1874.48	TRUE			FALSE	cc-by	epmc_xml	hybrid	TRUE	Wellcome Trust	MRC		WT076467
PMC4403954	0	10.1111/mmi.12949	Wiley	Molecular Microbiology	0950-382X, 1365-2958	Assembling the components of the quorum sensing pathway in African trypanosomes	1875	TRUE			FALSE	cc-by	epmc_xml	hybrid	TRUE	Wellcome Trust	0	0	088293; 103740; 095831
PMC4568947	26183450	10.15252/emmm.201404838	Wiley	EMBO Molecular Medicine	1757-4676, 1757-4684	The cholesterol binding protein NPC2 restrains recruitment of stromal macrophage-lineage cells to early-stage mouse lung tumours	1875	TRUE			FALSE	cc-by	epmc_xml	oa	TRUE	Cancer Research UK	0	0	Cancer Research UK - RM31G0204 (UoL), CRUK (A13803)	0	0
PMC4542219	26141681	10.1016/j.canep.2015.06.006	Elsevier	Cancer Epidemiology	1877-7821, 1877-783X	Seasonal variation in diagnosis of invasive cutaneous melanoma in Eastern England and Scotland	1875.58	TRUE			FALSE	cc-by	epmc_xml	hybrid	TRUE	0	0	0	0	0	0
PMC4567073	26412914	10.1016/j.mee.2015.02.022	Elsevier	Microelectronic Engineering	0167-9317, 1873-5568	An open access microfluidic device for the study of the physical limits of cancer cell deformation during migration in confined environments	1875.67	TRUE			FALSE	cc-by	epmc_xml	hybrid	TRUE	Wellcome Trust
PMC4477882	26103620	10.1371/journal.pmed.1001843	PLOS	PLoS Medicine	1549-1277, 1549-1676	Transmission of multidrug-resistant and drug susceptible tuberculosis within households: a prospective cohort study.	1876.66	TRUE			FALSE	cc-by	epmc_xml	oa	TRUE	Wellcome Trust			WT078067/Z/05/Z
PMC4427278	25708717	10.1016/j.breast.2015.02.001	Elsevier	Breast	0960-9776, 1532-3080	Adjusting the frequency of mammography screening on the basis of genetic risk: Attitudes among women in the UK	1876.9	TRUE			FALSE	cc-by	epmc_xml	hybrid	TRUE	Cancer Research UK			508007
PMC4504158	26177720	10.1186/s12964-015-0112-z	BioMed Central	Cell Communication and Signaling	1478-811X	Orai/CRACM1 and KCa3.1 ion channels interact in the human lung mast cell plasma membrane	1878	TRUE			FALSE	cc-by	epmc_xml	oa	TRUE	Wellcome Trust	0	0	CRACM ion channel function in human lung mast cells. Grant no: 087499	0	0
PMC4642598	26092658	10.1007/s11548-015-1236-8	Springer	International Journal of Computer Assisted Radiology and Surgery	1861-6410, 1861-6429	Locally Rigid, Vessel Based Registration for Laparoscopic Liver Surgery	1879.61	TRUE			FALSE	cc-by	epmc_xml	hybrid	TRUE	Wellcome Trust			HICF-T4-317: Smart Laparoscopic Liver Resection
PMC4541717	26171931	10.1016/j.marenvres.2015.06.017	Elsevier	Marine Environmental Research	0141-1136, 1879-0291	Transcriptome analysis of Aeromanas molluscorum Av27 cells exposed to tributyltin (TBT): unravelling the effects from the molecular level to the organism	1880.16	TRUE			FALSE	cc-by	epmc_xml	hybrid	TRUE	Wellcome Trust			097831/Z/11/Z
PMC4516898	25930055	10.1007/s10654-015-0037-2	Springer	European Journal of Epidemiology	0393-2990, 1573-7284	The Bangladesh Risk of Acute Vascular Events (BRAVE) Study: objectives and design	1880.21	TRUE			FALSE	cc-by	epmc_xml	hybrid	TRUE	0	0	0	0	0	0
PMC4600472	26007324	10.1007/s00213-015-3963-5	Springer	Psychopharmacology	0033-3158, 1432-2072	The role of 5-HT2C receptors in touchscreen visual reversal learning in the rat: a cross-site study	1880.21	TRUE			FALSE	cc-by	epmc_xml	hybrid	TRUE	0	0	0	0	0	0
PMC4519633	25787932	10.1007/s40273-015-0268-9	Springer	PharmacoEconomics	1170-7690, 1179-2027	The Economic Costs of Type 2 Diabetes: A Global Systematic Review	1881.82	TRUE			FALSE	cc-by	epmc_xml	hybrid	TRUE	0	0	0	0	0	0
PMC4471026	25680352	10.1007/s11606-015-3206-9	Springer	Journal of General Internal Medicine	0884-8734, 1525-1497	Cognitive function and health literacy decline in a cohort of aging English adults	1882.66	TRUE			FALSE	cc-by	epmc_xml	hybrid	TRUE	Cancer Research UK			C1418/A14134
PMC4317514	25664224	10.1007/s40142-014-0062-6	Springer	Current Genetic Medicine Reports	2167-4876	Genetic variants and related biomarkers in sporadic Alzheimerâ€™s disease	1882.66	TRUE			FALSE	cc-by	epmc_xml	hybrid	TRUE	Wellcome Trust	MRC		WT089698	WT089698
PMC4509554	26120055	10.1016/j.ceca.2015.05.002	Churchill Livingstone	Cell Calcium	0143-4160, 1532-1991	The effect of 2,5-di(tert-butyl)-1,4-benzohydroquinone (TBQ) on intracellular Ca2+ handling in rat ventricular myocytes	1883.42	TRUE			FALSE	cc-by	epmc_xml	hybrid	TRUE
PMC4524828	25998783	10.1007/s12687-015-0234-4	Springer	Journal of Community Genetics	1868-310X, 1868-6001	Between personal and relational privacy: understanding the work of informed consent in cancer genetics in Brazil	1883.51	TRUE			FALSE	cc-by	epmc_xml	hybrid	TRUE	Wellcome Trust
PMC4472941	25940643	10.1007/s00125-015-3602-z	Springer	Diabetologia	0012-186X, 1432-0428	Higher Glucose, Insulin And Insulin Resistance (Homa-Ir) In Childhood Predict Adverse Cardiovascular Risk In Early Adulthood: The Pune Childrenâ€™S Study	1885.44	TRUE			FALSE	cc-by	epmc_xml	hybrid	TRUE	Wellcome Trust			083460/Z/07/Z
PMC4591198	25981681	10.1007/s11019-015-9644-7	Springer	Medicine, Health Care and Philosophy	1386-7423, 1572-8633	Human Dignity and the Creation of Human-Nonhuman Chimeras	1885.94	TRUE			FALSE	cc-by	epmc_xml	hybrid	TRUE
PMC4402081	25909081	10.1002/acn3.175	Wiley	Annals of Clinical and Translational Neurology	2328-9503	Identification of distinct circulating exosomes in Parkinson's disease	1887	TRUE			FALSE	cc-by	epmc_xml	oa	TRUE	Wellcome Trust				HMRVVC00
PMC4636510	26255741	10.1016/j.breast.2015.07.013	Elsevier	The Breast	0960-9776, 1532-3080	Impact of Preventive Therapy on the Risk of Breast Cancer among Women with Benign Breast Disease	1889.61	TRUE			FALSE	cc-by	epmc_xml	hybrid	TRUE	Cancer Research UK			C5569/A16891
PMC4469414	25862636	10.1007/s00401-015-1419-y	Springer	Acta Neuropathologica	0001-6322, 1432-0533	A?43 is neurotoxic and primes aggregation of A?40 in vivo	1890.37	TRUE			FALSE	cc-by	epmc_xml	hybrid	TRUE	Wellcome Trust			Linda Partridge
PMC4535316	26095949	10.1016/j.vetpar.2015.06.003	Elsevier	Veterinary Parasitology	0304-4017, 1873-2550	Application of small RNA technology for improved control of parasitic helminths	1890.52	TRUE			FALSE	cc-by	epmc_xml	hybrid	TRUE	Wellcome Trust			WT 086823/Z/08/Z
PMC4533237	26092097	10.1016/j.jad.2015.05.053	Elsevier	Journal of Affective Disorders	0165-0327, 1573-2517	A Multiple Indicators Multiple Causes model of late-life depression in Latin American countries	1891.03	TRUE			FALSE	cc-by	epmc_xml	hybrid	TRUE	Wellcome Trust			GR066133
PMC4611020	25905688	10.1007/s10439-015-1323-6	Springer	Annals of Biomedical Engineering	0090-6964, 1573-9686	Layer- and Direction-Specific Material Properties, Extreme Extensibility and Ultimate Material Strength of Human Abdominal Aorta and Aneurysm: A Uniaxial Extension Study	1891.66	TRUE			FALSE	cc-by	epmc_xml	hybrid	TRUE	0	0	0	0	0	0
PMC4346279	25555520	10.1016/j.echo.2014.11.014	Elsevier	Journal of the American Society of Echocardiography	0894-7317, 1097-6795	Left ventricular rotational mechanics in Tanzanian children	1895.38	TRUE			FALSE	cc-by	epmc_xml	hybrid	TRUE	Wellcome Trust			WT080025
PMC4370744	25527037	10.1016/j.pep.2014.12.007	Elsevier	Protein Expression and Purification	1046-5928, 1096-0279	Expression and purification of functional human glycogen synthase-1:glycogenin-1 complex in insect cells	1895.59	TRUE			FALSE	cc-by	epmc_xml	hybrid	TRUE	Wellcome Trust				092381/Z/10/Z
PMC4600470	26173611	10.1007/s00213-015-4017-8	Springer	Psychopharmacology	0033-3158, 1432-2072	Trial-unique, delayed nonmatching-to-location (TUNL) touchscreen testing for mice: Sensitivity to dorsal hippocampal dysfunction	1896.14	TRUE			FALSE	cc-by	epmc_xml	hybrid	TRUE	0	0	0	0	0	0
PMC4504987	0	10.1007/s11248-015-9883-7	Springer	Transgenic Research	0962-8819, 1573-9368	Lessons from mouse chimaera experiments with a reiterated transgene marker: revised marker criteria and a review of chimaera markers	1899.49	TRUE			FALSE	cc-by	epmc_xml	hybrid	TRUE	Wellcome Trust	0	0	043031/Z/94/Z and 046359/Z/95/Z
PMC4326175	25596956	10.1016/j.psychres.2014.12.012	Elsevier	Psychiatry Research	0165-1781, 1872-7123	Risk of suicide for individuals reporting asthma and atopy in young adulthood: Findings from the Glasgow Alumni study	1899.75	TRUE			FALSE	cc-by	epmc_xml	hybrid	TRUE	Wellcome Trust			WT93848
PMC4479978	26146511	10.1111/phc3.12200	Wiley	Philosophy Compass	1747-9991	Scientific Challenges to Free Will and Moral Responsibility	1900.1	TRUE			FALSE	cc-by	publisher	hybrid	TRUE	Wellcome Trust				086041/Z/08/Z
PMC4572080	0	10.1007/s00204-015-1453-5	Springer	Archives of Toxicology	0340-5761, 1432-0738	Diquat causes caspase-independent cell death in SH-SY5Y cells by production of ROS independently of mitochondria	1901.75	TRUE			FALSE	cc-by	epmc_xml	hybrid	TRUE	Wellcome Trust	0	0	096919/Z/11/Z	0	0
PMC4276809	0	10.1186/s12916-014-0220-4	BioMed Central	BMC Medicine	1880-6546, 1880-6562	Elevated risk of stillbirth in males: systematic review and meta-analysis of more than 30 million births	1902	TRUE			FALSE	cc-by	epmc_xml	hybrid	TRUE	Wellcome Trust	0	0	WT094535MA	0	0
PMC4604250	26189075	10.1016/j.schres.2015.06.016	Elsevier	Schizophrenia Research	0920-9964, 1573-2509	Longitudinal regional brain volume loss in schizophrenia: relationship to antipsychotic medication and change in social function	1902.71	TRUE			FALSE	cc-by	epmc_xml	hybrid	TRUE	0	0	0	0	0	0
PMC4434856	26000232	10.1007/s10389-015-0662-y	Oxford University Press	Journal of Public Health	2198-1833, 1613-2238	Socio-economic patterning of cardiometabolic risk factors in rural and peri-urban India: Andhra Pradesh Children and parents study.	1903.25	TRUE			FALSE	cc-by	epmc_xml	hybrid	TRUE	Wellcome Trust			WT084674MF
PMC4344953	25725809	10.1007/s00395-015-0476-7	Springer	Basic Research in Cardiology	0300-8428, 1435-1803	Exendin-4 protects against post-myocardial infarction remodelling via specific actions on inflammation and the extracellular matrix	1903.74	TRUE			FALSE	cc-by	epmc_xml	hybrid	TRUE	British Heart Foundation			PG/09/102
PMC4523698	25847663	10.1007/s11548-015-1174-5	Springer	International Journal of Computer Assisted Radiology and Surgery	1861-6410, 1861-6429	Stability, structure and scale: improvements in multi-modal vessel extraction for SEEG trajectory planning	1903.9	TRUE			FALSE	cc-by	epmc_xml	hybrid	TRUE	Wellcome Trust			HICF-T4-275
PMC4529449	25636587	10.1007/s00441-014-2106-3	Springer	Cell and Tissue Research	0302-766X, 1432-0878	Tissue non-specific alkaline phosphatase production by human dental pulp stromal cells is enhanced by high density cell culture	1904.08	TRUE			FALSE	cc-by	epmc_xml	hybrid	TRUE	WELMEC	0	0	WT 088908/Z/09/Z	0	0
PMC4455908	25955558	10.1016/j.jmbbm.2015.03.028	Elsevier	Journal of the Mechanical Behavior of Biomedical Materials	1751-6161, 1878-0180	Derivation of inter-lamellar behaviour of the intervertebral disc annulus	1904.34	TRUE			FALSE	cc-by	epmc_xml	hybrid	TRUE	Wellcome Trust	EPSRC	0	WT 088908/Z/09/Z	EP/F010575/1	0
PMC4533242	25966920	10.1016/j.compbiomed.2015.04.032	Elsevier	Computers in Biology and Medicine	0010-4825, 1879-0534	Model of unidirectional block formation leading to reentrant ventricular tachycardia in the infarct border zone of postinfarction canine hearts.	1904.45	TRUE			FALSE	cc-by	epmc_xml	hybrid	TRUE	BHF			RG/10/11/28457
PMC4392172	0	10.1007/s10544-015-9951-z	Springer	Biomedical Microdevices	1387-2176, 1572-8781	Engineered self assembling monolayers for label free detection of influenza nucleoprotein	1905.18	TRUE			FALSE	cc-by	epmc_xml	hybrid	TRUE	Wellcome Trust	0	0	093581/Z/10/Z	0	0
PMC4339382	25710373	10.1371/journal.pmed.1001789	PLOS	PLOS Medicine	1549-1277, 1549-1676	Spatial and Temporal Heterogeneity in High-Grade Serous Ovarian Cancer: A Phylogenetic Analysis	1905.39	TRUE			FALSE	cc-by	epmc_xml	oa	TRUE	0	0	0	0	0	0
PMC4651322	26163172	10.1016/j.amepre.2015.04.020	Elsevier	American Journal of Preventive Medicine	0749-3797, 1873-2607	Supermarket Choice, Shopping Behavior, Socioeconomic Status, and Food Purchases	1905.43	TRUE			FALSE	cc-by	epmc_xml	hybrid	TRUE	0	0	0	0	0	0
PMC4464051	25660551	10.1007/s00127-015-1021-6	Springer	Social Psychiatry and Psychiatric Epidemiology	0933-7954, 1433-9285	Schizophrenia and other psychotic disorders in Caribbean-born migrants and their descendants in England: systematic review and meta-analysis of incidence rates, 1950â€“2013	1906.54	TRUE			FALSE	cc-by	epmc_xml	hybrid	TRUE	Wellcome Trust			101272/Z/13/Z
PMC4419186	25758233	10.1007/s00787-015-0697-1	Springer	European Child and Adolescent Psychiatry	1018-8827, 1435-165X	Emotional and Behavioural Difficulties in Children and Adolescents with Hearing Impairment: A Systematic Review and Meta-analysis	1906.97	TRUE			FALSE	cc-by	epmc_xml	hybrid	TRUE	Wellcome Trust			089251/Z/09/Z
PMC4526885	26070023	10.1021/acs.analchem.5b01353	American Chemical Society	Analytical Chemistry	0003-2700, 1520-6882	A 3D printed microfluidic device with integrated biosensors for online analysis of subcutaneous human microdialysate	1907.58	TRUE			FALSE	cc-by	epmc_xml	hybrid	TRUE	WT			094912/Z/10/Z
PMC4486782	26047771	10.1007/s10554-015-0678-y	Springer	International Journal of Cardiovascular Imaging	1569-5794, 1875-8312	Assessment of the relationships between myocardial contractility and infarct tissue revealed by serial magnetic resonance imaging in patients with acute myocardial infarction	1910.69	TRUE			FALSE	cc-by	epmc_xml	hybrid	TRUE	British Heart Foundation			PG/11/2/28474
PMC4537048	25970771		Impact Journals	Oncotarget	1949-2553	Loss of the deubiquitylase BAP1 alters class I histone deacetylase expression and sensitivity of mesothelioma cells to HDAC inhibitors	1911.08	TRUE			FALSE	cc-by	epmc_xml	hybrid	TRUE	Wellcome Trust			102382/Z/13/Z
PMC4284309	25524786	10.1016/j.jaac.2014.10.003	Elsevier	Journal of the American Academy of Child and Adolescent Psychiatry	0890-8567, 1527-5418	Sex/Gender Differences and Autism: Setting the Scene for Future Research	1911.31	TRUE			FALSE	cc-by	epmc_xml	hybrid	TRUE	0	0	0	0	0	0
PMC4348505	25735751	10.1007/s10495-015-1091-7	Springer	Apoptosis	1360-8185, 1573-675X	Exposure to the complement C5b-9 complex sensitizes 661W photoreceptor cells to both apoptosis and necroptosis	1912.28	TRUE			FALSE	cc-by	epmc_xml	hybrid	TRUE	Wellcome Trust			90669
PMC4441747	25631693	10.1007/s00127-015-1013-6	Springer	Social Psychiatry and Psychiatric Epidemiology	0933-7954, 1433-9285	SEARCHING FOR PSYCHOSIS: INTREPID (1): Systems for Detecting Untreated and First Episode Cases of Psychosis in Diverse Settings	1912.68	TRUE			FALSE	cc-by	epmc_xml	hybrid	TRUE	Wellcome Trust			WT094525
PMC4605986	25920749	10.1007/s00198-015-3142-x	Springer	Osteoporosis International	0937-941X, 1433-2965	Disuse rescues the age-impaired adaptive response to external loading in mice	1913.04	TRUE			FALSE	cc-by	epmc_xml	hybrid	TRUE	Wellcome Trust			WT092045/Z/10/Z
PMC4549390	25877916	10.1007/s00467-015-3089-3	Springer	Pediatric Nephrology	0931-041X, 1432-198X	Towards a biomarker panel for the assessment of AKI in children receiving intensive care	1913.76	TRUE			FALSE	cc-by	epmc_xml	hybrid	TRUE
PMC4533235	25857546	10.1016/j.echo.2015.02.020	Elsevier	Journal of the American Society of Echocardiography	0894-7317, 1097-6795	Accuracy and test-retest reproducibility of two-dimensional knowledge-based volumetric reconstruction of the right ventricle in pulmonary hypertension	1914.43	TRUE			FALSE	cc-by	epmc_xml	hybrid	TRUE	British Heart Foundation			Clinical Research Training Fellowship (grant number FS/11/72/28955)
PMC4528068	26026493	10.1016/j.drugalcdep.2015.05.005	Elsevier	Drug and Alcohol Dependence	0376-8716, 1879-0046	Comparison of the characteristics of long-term users of electronic cigarettes versus nicotine replacement therapy: a cross-sectional survey of English ex-smokers and current smokers	1914.43	TRUE			FALSE	cc-by	epmc_xml	hybrid	TRUE	Cancer Research UK
PMC4568012	25893673	10.1007/s12104-015-9609-z	Springer	Biomolecular NMR assignments	1874-2718, 1874-270X	Secondary structure and 1H, 13C, 15N resonance assignments of the endosomal sorting protein sorting nexin 3	1915.13	TRUE			FALSE	cc-by	epmc_xml	hybrid	TRUE	Wellcome Trust	Cancer Research UK	0	DJAD RCHX17990	DJAD RCPV15220	0
PMC4509719	25839716	10.1016/j.envres.2015.03.022	Elsevier	Environmental Research	0013-9351, 1096-0953	Genome-wide association study of plasma levels of polychlorinated biphenyls disclose an association with the CYP2B6 gene in a population-based sample	1915.42	TRUE			FALSE	cc-by	epmc_xml	hybrid	TRUE	Wellcome Trust	Wellcome Trust	Wellcome Trust		WT098017, WT090532	097306/Z/11/Z
PMC4412724	25893393	10.1007/s10856-015-5517-0	Springer	Journal of Materials Science: Materials in Medicine	0957-4530, 1573-4838	Development and characterisation of a decellularised bovine osteochondral biomaterial for cartilage repair	1917.62	TRUE			FALSE	cc-by	epmc_xml	hybrid	TRUE	Wellcome Trust	EPSRC	0	WT 088908/Z/09/Z	0	0
PMC4422362	25422368	10.1096/fj.14-263004	FASEB	FASEB Journal	0892-6638, 1530-6860	Suppression of erythropoiesis by dietary nitrate	1919.76	TRUE			FALSE	cc-by	epmc_xml	hybrid	TRUE	0	0	0	0	0	0
PMC4455734	26018832	10.1098/rsbl.2015.0041	Royal Society	Biology Letters	1744-9561, 1744-957X	Neural mechanisms of infant learning: differences in frontal theta activity during object exploration modulate subsequent object recognition	1920	TRUE			FALSE	cc-by	epmc_xml	hybrid	TRUE	Wellcome Trust	0	0	088427/Z/09/Z	0	0
PMC4361697	0	10.1177/1742271X14566067	SAGE	Ultrasound	1742-271X, 1743-1344	A training, assessment and feedback package for the trainee shoulder sonographer	1920	TRUE			FALSE	cc-by	epmc_xml	hybrid	TRUE
PMC4277102	25411409	10.1098/rsif.2014.1079	The Royal Society	Interface	1742-5689, 1742-5662	Multi-scale mechanical characterization of highly swollen photo-activated collagen hydrogels	1920	TRUE			FALSE	cc-by	epmc_xml	hybrid	TRUE	Wellcome Trust	EPSRC	0	WT 088908/Z/09/Z	0	0
PMC4527383	25964450	10.1098/rstb.2014.0137	The Royal Society	Philosophical Transactions of the Royal Society B: Biological Sciences.	0962-8436, 1471-2970	The impact of maternal infection with Mycobacterium tuberculosis on the infant response to Bacille Calmette Guerin immunization.	1920	TRUE			FALSE	cc-by	epmc_xml	hybrid	TRUE	Wellcome Trust			WT095778
PMC4528418	26194755	10.1098/rstb.2014.0241	Royal Society	Philosophical Transactions B	0962-8436, 1471-2970	Dynamics of immunoglobulin sequence diversity in HIV-1 infected individuals	1920	TRUE			FALSE	cc-by	epmc_xml	hybrid	TRUE	Wellcome Trust				090532/Z/09/Z
PMC4528488	26150656	10.1098/rstb.2014.0290	Royal Society	Philosophical Transactions B	0962-8436, 1471-2970	Effects of neutralizing antibodies on escape from CD8+ T-Cell responses in HIV-1 infection	1920	TRUE			FALSE	cc-by	epmc_xml	hybrid	TRUE	Wellcome Trust				097813/Z/11/A
PMC4361495	25315827	10.1177/0269881114553647	SAGE	Journal of Psychopharmacology	0269-8811, 1461-7285	Recent genetic findings in schizophrenia and their therapeutic relevance	1920	TRUE			FALSE	cc-by	epmc_xml	hybrid	TRUE	Wellcome Trust				89281
PMC4611988	26169059	10.1177/0004563215597944	SAGE	Annals of Clinical Biochemistry	0004-5632, 1758-1001	The Mendelian colorectal cancer syndromes	1920	TRUE			FALSE	cc-by	epmc_xml	hybrid	TRUE	Wellcome Trust				090532/Z/09/Z
PMC4351433	25652388	10.1007/s00125-015-3509-8	Springer	Diabetologia	0012-186X, 1432-0428	IL-21 production by CD4+ effector T cells and frequency of circulating follicular helper T cells are increased in type 1 diabetes patients	1920.97	TRUE			FALSE	cc-by	epmc_xml	hybrid	TRUE	0	0	0	0	0	0
PMC4526580	26071759	10.1007/s00125-015-3647-z	Springer	Diabetologia	0012-186X, 1432-0428	Diagnosis of gestational diabetes mellitus: falling through the net	1921.12	TRUE			FALSE	cc-by	epmc_xml	hybrid	TRUE	0	0	0	0	0	0
PMC4392114	25693751	10.1007/s00125-015-3517-8	Springer	Diabetologia	0012-186X, 1432-0428	Diabetes risk and amino acid profiles: cross-sectional and prospective analyses of ethnicity, amino acids and diabetes in a South Asian and European cohort from the SABRE (Southall and Brent REvisited) Study	1921.25	TRUE			FALSE	cc-by	epmc_xml	hybrid	TRUE	Wellcome Trust / British Heart Foundation			WT082464, SP/07/001/23606
PMC4486781	25832892	10.1007/s10522-015-9571-2	Springer	Biogerontology	1389-5729, 1573-6768	Being cool: How body temperature influences ageing and longevity	1923.24	TRUE			FALSE	cc-by	epmc_xml	hybrid	TRUE	Wellcome Trust			WT094386MA
PMC4357237	25748676	10.1042/BJ20141404	Portland Press	Biochemical Journal	0264-6021, 1470-8728	Platelet Rho GTPases â€“ A focus on novel players, roles and relationships	1925.69	TRUE			FALSE	cc-by	epmc_xml	hybrid	TRUE	British Heart Foundation	Wellcome Trust		PG/13/14/30023
PMC4506484	0	10.1007/s00262-015-1703-7	Springer	Cancer Immunology, Immunotherapy	0340-7004, 1432-0851	Idiotypic DNA vaccination for the treatment of multiple myeloma: Safety and immunogenicity in a phase I clinical study	1925.88	TRUE			FALSE	cc-by	epmc_xml	hybrid	TRUE	Cancer Research UK			C491/A7301
PMC4642743	26056046	10.1016/j.knee.2015.05.003	Elsevier	The Knee	0968-0160, 1873-5800	The clinical effectiveness of self-care interventions with an exercise component to manage knee conditions: a systematic review	1926.15	TRUE			FALSE	cc-by	epmc_xml	hybrid	TRUE
PMC4443503	25799364	10.1016/j.crad.2015.02.013	Elsevier	Clinical Radiology	0009-9260, 1365-229X	Assessing myeloma bone diseases with whole-body diffusion-weighted imaging	1927	TRUE			FALSE	cc-by	epmc_xml	hybrid	TRUE	Cancer Research UK			0
PMC4460268	25986438	10.1007/s00439-015-1563-4	Springer	Human Genetics	0340-6717, 1432-1203	Telomere length and common disease: study design and analytical challenges	1927.28	TRUE			FALSE	cc-by	epmc_xml	hybrid	TRUE	Cancer Research UK	0	0	C588/A10589	C588/A19167	0
PMC4561526	25975768	10.1016/j.healthpol.2015.04.015	Elsevier	Health Policy	0168-8510, 1872-6054	Factors that influence the way local communities respond to consultation processes about major service change: a qualitative study	1928.77	TRUE			FALSE	cc-by	epmc_xml	hybrid	TRUE	Wellcome Trust			WT091024MA
PMC4394773	25691625	10.1128/AAC.04067-14	American Society for Microbiology	Antimicrobial Agents and Chemotherapy	0066-4804, 1098-6596	The Mu Subunit of Plasmodium falciparum clathrin-associated adaptor protein 2 modulates in vitro parasite response to artimisinin and quinine.	1929.49	TRUE			FALSE	cc-by	epmc_xml	hybrid	TRUE	Wellcome Trust
PMC4452595	25726153	10.1007/s11121-015-0552-0	Springer	Prevention Science	1389-4986, 1573-6695	Implementation of a School-based Social and Emotional Learning Intervention: Understanding diffusion processes within a complex system.	1929.54	TRUE			FALSE	cc-by	epmc_xml	hybrid	TRUE	Wellcome Trust			WT087640MA
PMC4320297	25663154	10.1007/s11920-015-0551-7	Springer	Current Psychiatry Reports	1523-3812, 1535-1645	Disseminating evidence-based psychological treatments for eating disorders	1929.72	TRUE			FALSE	cc-by	epmc_xml	hybrid	TRUE	Wellcome Trust				94585
PMC4414928	25614100	10.1016/j.vetmic.2014.11.023	Elsevier	Veterinary Microbiology	0378-1135, 1873-2542	Resolution of the cellular proteome of the nucleocapsid protein from a highly pathogenic isolate of porcine reproductive and respiratory syndrome virus identifies PARP-1 as a cellular target whose interaction is critical for virus biology	1930.48	TRUE			FALSE	cc-by	epmc_xml	hybrid	TRUE	Wellcome Trust	0	0	099760/Z/12/Z	0	0
PMC4516908	25773750	10.1007/s10654-015-0011-z	Springer	European Journal of Epidemiology	0393-2990, 1573-7284	Using published data in Mendelian randomization: a blueprint for efficient identification of causal risk factors	1930.67	TRUE			FALSE	cc-by	epmc_xml	hybrid	TRUE	0	0	0	0	0	0
PMC4510144	25979230	10.1016/j.canlet.2015.05.005	Elsevier	Cancer Letters	0304-3835, 1872-7980	Curcumin inhibits cancer stem cell phenotypes in ex vivo models of colorectal liver metastases, and is clinically safe and tolerable in combination with FOLFOX chemotherapy.	1930.8	TRUE			FALSE	cc-by	epmc_xml	hybrid	TRUE	Cancer Research UK	0	0	This project was supported by Cancer Research UK on a programme grant for Cancer Chemoprevention [C325/A13101] and by Cancer Research UK in conjunction with the Department of Health on an Experimental Cancer Medicine Centre grant [C325/A15575].	0	0
PMC4673595	26196409	10.3109/09537104.2015.1064881	Taylor & Francis	Platelets	0953-7104, 1369-1635	The role of platelets in the recruitment of leukocytes during vascular disease	1931.04	TRUE			FALSE	cc-by	epmc_xml	hybrid	TRUE	British Heart Foundation	0	0	PG/11/49/28983	RG/12/7/29693	0
PMC4365269	25657030	10.1007/s10577-014-9456-2	Springer	Chromesome Research	0967-3849, 1573-6849	Developing de novo human artificial chromosomes in embryonic stem cells using HSV-1 amplicon technology	1932	TRUE			FALSE	cc-by	epmc_xml	hybrid	TRUE	Wellcome Trust				90532
PMC4567633	26169273	10.1128/IAI.00446-15	Cenveo Publisher Services	Infection and Immunity	0019-9567, 1098-5522	Phosphoantigen burst upon Plasmodium falciparum rupture can distantly activate Vgamma9-VdeltaA2T-cells.	1934.11	TRUE			FALSE	cc-by	epmc_xml	hybrid	TRUE	Wellcome Trust			WT094752
PMC4505219	26014936	10.1128/AAC.00520-15	Cenveo Publisher Services	Antimicrobial Agents and Chemotherapy	0066-4804, 1098-6596	The limited ability of posaconazole to cure both acute and chronic Trypanosoma cruzi infections revealed by highly sensitive in vivo imaging.	1934.11	TRUE			FALSE	cc-by	epmc_xml	hybrid	TRUE	Wellcome Trust			WT092573
PMC4526597	25801925	10.3758/s13415-015-0347-6	Springer	Cognitive, Affective, & Behavioral Neuroscience	1530-7026, 1531-135X	Model-based learning protects against forming habits	1935.91	TRUE			FALSE	cc-by	epmc_xml	hybrid	TRUE	0	0	0	0	0	0
PMC4439430	25894764	10.1007/s00430-015-0411-4	Springer	Medical Microbiology and Immunology	0300-8584, 1432-1831	Human cytomegalovirus: taking the strain	1936.48	TRUE			FALSE	cc-by	epmc_xml	hybrid	TRUE	Wellcome Trust			WT090323MA
PMC4627489	26031710	10.1016/j.jpainsymman.2015.05.009	Elsevier	Journal of Pain and Symptom Management	0885-3924, 1873-6513	Symptom control trials in patients with advanced cancer: a qualitative study	1936.94	TRUE			FALSE	cc-by	epmc_xml	hybrid	TRUE	Cancer Research UK	0	0	C17958/A11922
PMC4303646	25468674	10.1016/j.vetpar.2014.11.004	Elsevier	Veterinary Parasitology	0304-4017, 1873-2550	Variant surface glycoproteins from Venezuelan trypanosome isolates are recognized by sera from animals infected with either Trypanosoma evansi or Trypanosoma vivax	1937.26	TRUE			FALSE	cc-by	publisher	hybrid	TRUE	Wellcome Trust			WT093691/Z/10/Z
PMC4593301	25978869	10.1016/j.compbiomed.2015.04.027	Elsevier	Computers in Biology and Medicine	0010-4825, 1879-0534	Techniques for automated local activation time annotation and conduction velocity estimation in cardiac mapping	1937.94	TRUE			FALSE	cc-by	epmc_xml	hybrid	TRUE	BHF			FS/11/22/28745; RG/10/11/28457
PMC4506590	26187626	10.1186/s12966-015-0255-8	BioMed Central	International Journal of Behavioral Nutrition and Physical Activity	1479-5868	Generational differences in the physical activity of UK South Asians: a systematic review	1938	TRUE			FALSE	cc-by	epmc_xml	oa	TRUE	British Heart Foundation				006/P & C/CORE/2013/OXFSTATS
PMC4568005	25896032	10.1007/s12104-015-9605-3	Springer	Biomolecular NMR Assignments	1874-2718, 1874-270X	1H, 15N and 13C chemical shift assignments of the La motif and RRM1 from human LARP6	1940.68	TRUE			FALSE	cc-by	epmc_xml	hybrid	TRUE	Wellcome Trust			085944/B/08/Z
PMC4403958	24673807	10.1111/cea.12313		Clinical and Experimental Allergy	0954-7894, 1365-2222	CXC chemokines and antimicrobial peptides in rhinovirus-induced experimental asthma exacerbations	1941.24	TRUE			FALSE	cc-by	epmc_xml	hybrid	TRUE	Wellcome Trust			063717; 083567/Z/07/Z
PMC4657464	25912982	10.1111/ina.12169	Wiley	Indoor Air	0905-6947, 1600-0668	Author's reply.	1941.37	TRUE			FALSE	cc-by	epmc_xml	hybrid	TRUE	Wellcome Trust			WT0804674
PMC4390463	25611008	10.1111/tmi.12464	Wiley	Tropical Medicine & International Health	1360-2276, 1365-3156	Association between malaria exposure and Kaposi's sarcoma-associated herpes virus seropositivity in Uganda.	1941.37	TRUE			FALSE	cc-by	epmc_xml	hybrid	TRUE	Wellcome Trust			WT095778
PMC4452084	25882550	10.1016/j.leukres.2015.03.016	Elsevier	Leukemia Research	0145-2126, 1873-5835	The HSP90 inhibitor Ganetespib: A Potential Effective Agent for Acute Myeloid Leukaemia in Combination with Cytarabine.	1942.48	TRUE			FALSE	cc-by	epmc_xml	hybrid	TRUE
PMC4602067	26223880	10.1007/s00335-015-9587-6	Springer	Mammalian Genome	0938-8990, 1432-1777	Publishing and sharing multi-dimensional image data with OMERO	1943.61	TRUE			FALSE	cc-by	epmc_xml	hybrid	TRUE	Wellcome Trust				095931/Z11/Z
PMC4465960	25959093	10.1016/j.sleep.2015.02.532	Elsevier	Sleep Medicine	1389-9457, 1878-5506	Prospective associations between sedentary time, sleep duration and adiposity in adolescents	1943.62	TRUE			FALSE	cc-by	epmc_xml	hybrid	TRUE	0	0	0	0	0	0
PMC4497595	25964382	10.1530/REP-15-0102	Bioscientifica	Reproduction	1470-1626, 1741-7899	Regulation and roles of Ca2+ stores in human sperm	1944	TRUE			FALSE	cc-by	epmc_xml	hybrid	TRUE	Wellcome Trust	0	0	86470	0	0
PMC4041447	24748658	10.1093/nar/gku274	Oxford University Press	Nucleic Acids Research	0305-1048, 1362-4962	The forkhead transcription factor FOXK2 acts as a chromatin targeting factor for the BAP1-containing histone deubiquitinase complex.	1944	TRUE			FALSE	cc-by	epmc_xml	oa	TRUE
PMC4538274	26260348	10.1136/bmjopen-2015-007642	BMJ	BMJ Open	2044-6055	Behavioural physical activity interventions in participants with lower-limb osteoarthritis: a systematic review with meta-analysis	1944	TRUE			FALSE	cc-by	epmc_xml	oa	TRUE	British Heart Foundation				8685/80010/HH26
PMC4339697	25663263	10.1007/s11745-015-3993-0	Springer	Lipids	0024-4201, 1558-9307	The phosphoinositide 3-kinase signaling pathway is involved in the control of modified low-density lipoprotein uptake by human macrophages	1944.76	TRUE			FALSE	cc-by	epmc_xml	hybrid	TRUE	British Heart Foundation	British Heart Foundation		PG/10/55/28467	PG/12/50/29691
PMC4669308	26071937	10.1016/j.jaci.2015.04.042	Elsevier	Journal of Allergy & Clinical Immunology	0091-6749, 1097-6825	Filaggrin breakdown products determine corneocyte conformation in patients with atopic dermatitis	1945.65	TRUE			FALSE	cc-by	epmc_xml	hybrid	TRUE	Wellcome Trust				098439/Z/12/Z
PMC4649901	26073755	10.1016/j.jaci.2015.05.002	Elsevier	Journal of Allergy & Clinical Immunology	0091-6749, 1097-6825	Severe dermatitis, multiple allergies, and metabolic wasting syndrome caused by a novel mutation in the N-terminal plakin domain of desmoplakin	1945.65	TRUE			FALSE	cc-by	epmc_xml	hybrid	TRUE	Wellcome Trust				098439/Z/12/Z
PMC4274318	25448300	10.1016/j.ymeth.2014.10.028	Elsevier	Methods	1046-2023, 1095-9130	Modelling multi-protein complexes using PELDOR distance measurements for rigid body minimisation experiments using XPLOR-NIH	1949.82	TRUE			FALSE	cc-by	epmc_xml	hybrid	TRUE	Wellcome Trust				95062
PMC4304730	0	10.15252/embr.201439183	EMBO reports	Wiley	1469-221X, 1469-3178	Identification and characterization of novel factors that act in the nonsense-mediated mRNA decay pathway in nematodes, flies and mammals	1950	TRUE			FALSE	cc-by	epmc_xml	hybrid	TRUE	Wellcome Trust	0	0	095518/Z/11/Z
PMC4428036	25739811	10.15252/embr.201439820	Wiley	EMBO Reports	1469-221X, 1469-3178	USP30 deubiquitylates mitochondrial Parkin substratesÂ and restricts apoptotic cell death	1950	TRUE			FALSE	cc-by	epmc_xml	hybrid	TRUE	Wellcome Trust			092793/Z/10/Z
PMC4552491	26142279	10.15252/embr.201540330	Wiley	EMBO Reports	1469-221X, 1469-3178	Removal of H2A.Z by INO80 promotes homologous recombination	1950	TRUE			FALSE	cc-by	epmc_xml	hybrid	TRUE	Cancer Research UK			C7905/A16417
PMC4551353	26101372	10.15252/embj.201490361	Wiley	EMBO Journal	0261-4189, 1460-2075	TRIM5? requires Ube2W to anchor Lys63?linked ubiquitin chains and restrict reverse transcription	1950	TRUE			FALSE	cc-by	epmc_xml	hybrid	TRUE	Wellcome Trust	MRC
PMC4474317	25855731	10.1128/JVI.00315-15	American Society for Microbiology	Journal of Virology	0022-538X, 1098-5514	Molecular Chaperone Hsp90 Is a Therapeutic Target for Noroviruses	1950.2	TRUE			FALSE	cc-by	epmc_xml	hybrid	TRUE	0	0	0	0	0	0
PMC4460637	25367138	10.1111/mmi.12853	Wiley	Molecular Microbiology	0950-382X, 1365-2958	Homoserine and quorum-sensing acyl homoserine lactones as alternative sources of threonine: a potential role for homoserine kinase in insect-stage Trypanosoma brucei	1950.8	TRUE			FALSE	cc-by	epmc_xml	hybrid	TRUE	Wellcome Trust				79838	83481
PMC4435667	25801237	10.1016/j.schres.2015.02.017	Elsevier	Schizophrenia Research	0920-9964, 1573-2509	Sensorimotor gating, cannabis use and the risk of psychosis	1951.75	TRUE			FALSE	cc-by	epmc_xml	hybrid	TRUE	Wellcome Trust			WT089777MA
PMC4338365	25613485	10.1007/s10439-014-1231-1	Springer	Annals of Biomedical Engineering	0090-6964, 1573-9686	The Application of NCaRBS to the Trendelenburg Test and Total Hip Arthroplasty Outcome	1951.8	TRUE			FALSE	cc-by	epmc_xml	hybrid	TRUE
PMC4510145	26036451	10.1016/j.psyneuen.2015.05.003	Elsevier	Psychoneuroendocrinology	0306-4530, 1873-3360	Fetal brain 11?-hydroxysteroid dehydrogenase type 2 selectively determines programming of adult depressive-like behaviors and cognitive function, but not anxiety behaviors in male mice	1952.07	TRUE			FALSE	cc-by	epmc_xml	hybrid	TRUE	Wellcome Trust	0	0	WT079009			WT064890
PMC4591199	26239841	10.1007/s11019-015-9656-3	Springer	Medicine, Health Care and Philosophy	1386-7423, 1572-8633	The ethical challenges of the clinical introduction of mitochondrial replacement techniques	1952.6	TRUE			FALSE	cc-by	epmc_xml	hybrid	TRUE	Wellcome Trust
PMC4411218	25752843	10.1016/j.metabol.2015.02.007	Elsevier	Metabolism	0026-0495, 1532-8600	A Mediterranean-type diet is associated with better metabolic profile in urban Polish adults: results from the HAPIEE study	1954.19	TRUE			FALSE	cc-by	epmc_xml	hybrid	TRUE	Wellcome Trust			064947/Z/01/Z and 081081/Z/06/Z
PMC4425361	25843288	10.1016/j.jns.2015.03.007	Elsevier	Journal of Neurological Sciences	0022-510X, 1878-5883	Identification of environmental sounds and melodies in syndromes of anterior temporal lobe degeneration	1954.19	TRUE			FALSE	cc-by	epmc_xml	hybrid	TRUE	Wellcome Trust
PMC4486786	25893928	10.1007/s00441-015-2175-y	Springer	Cell and Tissue Research	0302-766X, 1432-0878	Crossmodal plasticity and hearing capabilities following blindness	1955.46	TRUE			FALSE	cc-by	epmc_xml	hybrid	TRUE	Wellcome Trust				WT07650AIA
PMC4415991	0	10.1007/s00125-015-3554-3	Springer	Diabetologia	0012-186X, 1432-0428	Islet transplantation from a nationally funded UK centre reaches socially deprived groups and improves metabolic outcomes	1959.35	TRUE			FALSE	cc-by	epmc_xml	hybrid	TRUE	British Heart Foundation	0	0	BHF Centre for Cardiovascular Science
PMC4502446	26004035	10.1016/j.jri.2015.04.003	Elsevier	Journal of Reproductive Immunology	0165-0378, 1872-7603	Decidual natural killer cells regulate vessel stability: implications for impaired spiral artery remodelling	1961.06	TRUE			FALSE	cc-by	epmc_xml	hybrid	TRUE	WT
PMC4411796	25889688	10.1186/s12916-015-0320-9	BioMed Central	BioMed Central Medicine	1741-7015	The predictive value of current haemoglobin levels for incident tuberculosis and/or mortality during long-term antiretroviral therapy in South Africa : a cohort study.	1962	TRUE			FALSE	cc-by	epmc_xml	oa	TRUE	Wellcome Trust			WT88590
PMC4643489	26343793	10.1016/j.imlet.2015.09.001	Elsevier	Immunology Letters	0165-2478, 1879-0542	The role of individual Protein Kinase C isoforms in mouse mast cell function and their targeting by the immunomodulatory parasitic worm product, ES-62	1963.85	TRUE			FALSE	cc-by	epmc_xml	hybrid	TRUE	Wellcome Trust			WT086852MA		0
PMC4340106	25886077	10.1186/s12966-015-0180-x	BioMed Central	International Journal of Behavioral Nutrition and Physical Activity	1479-5868	Perceived family functioning and friendship quality: cross-sectional associations with physical activity and sedentary behaviours	1965.97	TRUE			FALSE	cc-by	epmc_xml	oa	TRUE	0	0	0	0	0	0
PMC4497634	26162355	10.5588/ijtld.15.0071	International Union Against Tuberculosis and Lung Disease	International Journal of Tuberculosis and Lung DiseaseÂ	1027-3719, 1815-7920	Vitamin D deficiency in Malawian adults with pulmonary tuberculosis: risk factors and treatment outcomes	1968.12	TRUE			FALSE	cc-by	epmc_xml	hybrid	TRUE	Wellcome Trust			WT086757/Z/08/A
PMC4325190	25619794	10.1007/s00424-015-1690-8	Springer	PflÃ¼gers Archiv - European Journal of Physiology	0031-6768, 1432-2013	The hidden hand of chloride in hypertension	1971.04	TRUE			FALSE	cc-by	epmc_xml	hybrid	TRUE
PMC4503815	26051653	10.1016/j.tube.2015.05.009	Elsevier	Tuberculosis	1472-9792, 1873-281X	Kinetics of Mycobacterium tuberculosis-specific IFN-? responses and sputum bacillary clearance in HIV-infected adults during treatment of pulmonary tuberculosis	1973.62	TRUE			FALSE	cc-by	epmc_xml	hybrid	TRUE	Wellcome Trust			WT092773/Z/10/Z	WT086757/Z/08/Z	WT088696/Z/09/Z
PMC4589551	26248646	10.1007/s00125-015-3708-3	Springer	Diabetologia	0012-186X, 1432-0428	Convergence in insulin resistance between very severely obese and lean women at the end of pregnancy	1974.04	TRUE			FALSE	cc-by	epmc_xml	hybrid	TRUE	Wellcome Trust	0	0	090937/Z/09/Z
PMC4427107	0	10.1016/j.vetpar.2015.02.020	Elsevier	Veterinary Parasitology	0304-4017, 1873-2550	The epidemiology of tick-borne haemoparasites as determined by the reverse line blot hybridization assay in an intensively studied cohort of calves in western Kenya	1974.6	TRUE			FALSE	cc-by	epmc_xml	hybrid	TRUE	Wellcome Trust	0	0	095831/Z/11/Z
PMC4511203	25903105	10.1096/fj.14-264440	Federation of American Societies for Experimental Biology	FASEB journal	0892-6638, 1530-6860	HDAC4 is required for inflammation-associated thermal hypersensitivy	1975.09	TRUE			FALSE	cc-by	epmc_xml	hybrid	TRUE	Wellcome Trust			PNWRAER
PMC4370053	0	10.1189/jlb.1HI0714-351R	Society of Leukocyte Biology	Journal of Leukocyte Biology	0741-5400, 1938-3673	Langerine expressing dendtritic cells in human tissues are related to CD1c+dendtritic cells and distincts cells and distinct from Langerhans cells and CD141high XCR1+ dentritic cells	1977.54	TRUE			FALSE	cc-by	epmc_xml	hybrid	TRUE	Wellcome Trust	0	0	101155/Z/13/Z	0	0
PMC4611066	26227295	10.1159/000435856	Karger	Hormone Research in Paediatrics	1663-2818, 1663-2826	Description of the SAGhE cohort: a large European study of mortality and cancer incidence risks after childhood treatment with recombinant growth hormone	1980.5	TRUE			FALSE	cc-by	epmc_xml	hybrid	TRUE	Cancer Research UK			0
PMC4396692	0	10.1016/j.schres.2014.10.046	Elsevier	Schizophrenia Research	0920-9964, 1573-2509	Impact of cross-disorder polygenic risk on frontal brain activation with specific effect of schizophrenia risk	1981.6	TRUE			FALSE	cc-by	epmc_xml	hybrid	TRUE	Wellcome Trust	0	0	08772/Z/08/Z
PMC4355387	25581851	10.1111/tmi.12456	Wiley	Journal of Tropical Medicine & International Health	1360-2276, 1365-3156	Seizures, cysticercosis and rural-to-urban migration: the PERU MIGRANT study.	1982.16	TRUE			FALSE	cc-by	epmc_xml	hybrid	TRUE	Wellcome Trust			098504/Z/12/Z
PMC4383351	25521998	10.1111/bjh.13241	Wiley	British Journal of Haematology	0007-1048, 1365-2141	Epistasis and the sensitivity of phenotypic screens for beta thalassaemia	1982.17	TRUE			FALSE	cc-by	epmc_xml	hybrid	TRUE	Wellcome Trust				96063
PMC4428809	25482670	10.1007/s00424-014-1660-6		Pflugers Archive	0031-6768, 1432-2013	Two-pore domain potassium channels enable action potential generation in the absence of voltage-gated potassium channels.	1983.43	TRUE			FALSE	cc-by	epmc_xml	hybrid	TRUE	Wellcome Trust			072775/Z/03/Z
PMC4346278	25499839	10.1016/j.echo.2014.10.012	Elsevier	Journal of the American Society of Echocardiography	0894-7317, 1097-6795	Accuracy and reproducibility of right ventricular quantification in patients with pressure and volume overload using single-beat three-dimensional echocardiography	1986.06	TRUE			FALSE	cc-by	epmc_xml	hybrid	TRUE	British Heart Foundation			FS/11/72/28955
PMC4574524	26320251	10.4049/?jimmunol.1501404	American Association of Immunologists	Journal of Immunology	0022-1767, 1550-6606	Mapping the binding site of a cross-reactive Plasmodium falciparum PfEMP1 Monoclonal Antibody inhibitory of ICAM-1 binding	1987.78	TRUE			FALSE	cc-by	epmc_xml	hybrid	TRUE	Wellcome Trust				101020/Z/13/Z
PMC4333373	25572315	10.1136/archdischild-2015-308187	BMJ	Archives of Disease in Childhood	0305-1048, 1362-4962	Prevalence and associated harm of engagement in self- asphyxial behaviours (â€œChoking gameâ€) in young people: a systematic review	1989	TRUE			FALSE	cc-by	epmc_xml	oa	TRUE	MRC	Wellcome Trust	ESRC	MR/KO232331/1
PMC4413744	25573701	10.1136/jech-2014-204915	BMJ	Journal of Epidemiology and Community Health	0143-005X, 1470-2738	Low health literacy predicts decline in physical function among older adults: Findongs from the LitCog cohort study	1989	TRUE			FALSE	cc-by	epmc_xml	hybrid	TRUE	Cancer Research UK			C42785/A17965
PMC4621371	25583124	10.1136/jfprhc-2014-101082	BMJ	Journal of Family Planning and Reproductive Health Care	1471-1893, 2045-2098	Barriers to cervical cancer screening among ethnic minority women: a qualitative study	1989	TRUE			FALSE	cc-by	epmc_xml	hybrid	TRUE	Cancer Research UK			C19847/A11900
PMC4392309	25480883	10.1136/heartjnl-2014-306472	BMJ	Heart	1355-6037, 1468-201X	Cardiovascular risk profile and frailty in a population-based study of older British men	1989	TRUE			FALSE	cc-by	epmc_xml	hybrid	TRUE	British Heart Foundation	MRC
PMC4621377	26316045	10.1136/heartjnl-2015-307734	BMJ	Heart	1355-6037, 1468-201X	Cardiovascular status after Kawasaki disease in the UK	1989	TRUE			FALSE	cc-by	epmc_xml	hybrid	TRUE	British Heart Foundation			PG/10/84/28618
PMC4552925	25972443	10.1136/archdischild-2014-307636	BMJ	Archives of Disease in Childhood	1359-2998, 1468-2052	Cause-specific neonatal mortality: analysis of 3772 neonatal deaths in Nepal, Bangladesh, Malawi and India	1989	TRUE			FALSE	cc-by	epmc_xml	hybrid	TRUE	Wellcome Trust
PMC4518812	25512673	10.1136/sextrans-2014-051850	BMJ	Sexually Transmitted Infections	1368-4973, 1472-3263	Confirmatory assays are essential when testing for Neisseria gonorrhoeae in low prevalence settings: Insights from the third National Survey of Sexual Attitudes and Lifestyles (Natsal-3)	1989	TRUE			FALSE	cc-by	epmc_xml	hybrid	TRUE	Wellcome Trust	MRC / ESRC		84840	G0701757
PMC4602271	26209508	10.1136/thoraxjnl-2015-206801	BMJ	Thorax	0040-6376, 1468-3296	Has growth in electronic cigarette use by smokers been responsible for the decline in use of licensed nicotine products? Findings from repeated cross-sectional surveys	1989	TRUE			FALSE	cc-by	epmc_xml	hybrid	TRUE	Cancer Research UK			Smoking Toolkit Study (STS)
PMC4552920	26141503	10.1136/bmjqs-2015-004366	BMJ	BMJ Quality & Safety	2044-5415, 2044-5423	Ranking hospitals on avoidable death rates derived from retrospective case record review: methodological observations and limitations	1989	TRUE			FALSE	cc-by	epmc_xml	hybrid	TRUE	Cancer Research UK			A18180
PMC4680118	26285580	10.1136/jech-2015-205542	BMJ	Journal of Epidemiology and Community Health	0143-005X, 1470-2738	The influence of neighbourhood-level socioeconomic deprivation on cardiovascular disease mortality in older age: longitudinal multilevel analyses from a cohort of older British men	1989	TRUE			FALSE	cc-by	epmc_xml	hybrid	TRUE	British Heart Foundation	MRC
PMC4345935	25564561	10.1136/jmedgenet-2014-102691	BMJ	Journal of Medical Genetics	0022-2593, 1468-6244	The kinetochore protein, CENPF, is mutated in human ciliopathy and microcephaly phenotypes	1989	TRUE			FALSE	cc-by	epmc_xml	hybrid	TRUE	Wellcome Trust	MRC			G0802138/1
PMC4518759	25680615	10.1136/bjophthalmol-2014-305985	BMJ	British Journal of Ophthalmology	0007-1161, 1468-2079	The scotogenic contact lens: a novel device for treating binocular diplopia	1989	TRUE			FALSE	cc-by	epmc_xml	hybrid	TRUE	Wellcome Trust
PMC4549381	25511709	10.1007/s00429-014-0961-z	Springer	Brain Structure & Function	1863-2653, 1863-2661	From genes to folds: a review of cortical gyrification theory	1990.5	TRUE			FALSE	cc-by	epmc_xml	hybrid	TRUE	0	0	0	0	0	0
PMC4302233	25585682	10.1007/s00213-014-3855-0.	Springer	Psychopharmacology	0033-3158, 1432-2072	AÂ systematic reviewÂ ofÂ physiologicalÂ methodsÂ inÂ rodentÂ pharmacologicalÂ MRIÂ studies	1994.1	TRUE			FALSE	cc-by	epmc_xml	hybrid	TRUE	Wellcome Trust	#REF!	#REF!	WT093223AIA	#REF!	#REF!
PMC4506530	25470112	10.1002/cmdc.201402428	Wiley	ChemMedChem	1860-7179, 1860-7187	Small molecule inhibitors targeting protein-protein interaction in the RAD51 family of recombinases	1996.84	TRUE			FALSE	cc-by	epmc_xml	hybrid	TRUE	0	0	0	0	0	0
PMC4376459	25425280	10.1111/bph.13027		British Journal of Pharmacology	0007-1188, 1476-5381	The CXCR3 antagonist VUF10085 binds to an intrahelical site distinct from that of the broad spectrum antagonist TAK-779	1997.4	TRUE			FALSE	cc-by	epmc_xml	hybrid	TRUE	Arthritis Research UK			18303
PMC4509713	25917542	10.1016/j.crad.2015.03.009	Elsevier	Clinical Radiology	0009-9260, 1365-229X	Imaging of cardiovascular risk in patients with Turner's syndrome	1998.72	TRUE			FALSE	cc-by	epmc_xml	hybrid	TRUE	Wellcome Trust				WT 085664
PMC4335630	0	10.1159/000369777	Karger	Cerebrovascular Diseases	1015-9770, 1421-9786	Cerebral Small Vessel Disease and Renal Function: Systematic Review and Meta-Analysis	1999.64	TRUE			FALSE	cc-by	epmc_xml	hybrid	TRUE	Wellcome Trust	0	0	088134/Z/09/A
PMC4540143	26092100	10.1093/cvr/cvv176	Oxford University Press	Cardiovascular Research	0008-6363, 1755-3245	The cAMP-producing agonist beraprost inhibits human vascular smooth muscle cell migration via exchange protein directly activated by cAMP	2000	TRUE			FALSE	cc-by	epmc_xml	hybrid	TRUE	British Heart Foundation	0	0	FS/11/23/28730	0	0
PMC4566964	26221019	10.1093/jac/dkv206	Oxford University Press	Journal of Antimicrobial Chemotherapy	0305-7453, 1460-2091	Early insights into the potential of the Oxford Nanopore MinION for antimicrobial resistance gene detection	2000	TRUE			FALSE	cc-by	epmc_xml	hybrid	TRUE	0	0	0	0	0	0
PMC4589625	26457197	10.1155/2015/743263	Hindawi Publishing Corporation	Journal of Ophthalmology	2090-004X, 2090-0058	The Arclight ophthalmoscope: a reliable low-cost alternative to the standard direct ophthalmoscope.	2000	TRUE			FALSE	cc-by	epmc_xml	oa	TRUE	Wellcome Trust			WT098481/Z/12/Z
PMC4357799	25733562	10.1093/inthealth/ihv010	Oxford University Press	International Health	1876-3413, 1876-3405	Adult vector control, mosquito ecology and malaria transmission	2000	TRUE			FALSE	cc-by	epmc_xml	hybrid	TRUE	Wellcome Trust				095066/Z/10/Z
PMC4321022	25636950	10.1093/trstmh/tru206	Oxford University Press	Transactions of the Royal Society of Tropical Medicine & Hygiene	0035-9203, 1878-3503	Aerosol immunisation for TB: matching route of vaccination to route of infection	2000	TRUE			FALSE	cc-by	epmc_xml	hybrid	TRUE	Wellcome Trust				95780
PMC4572487	25981959	10.1093/brain/awv117	Oxford University Press	Brain	0006-8950, 1460-2156	De novo point mutations in patients diagnosed with ataxic cerebral palsy	2000	TRUE			FALSE	cc-by	epmc_xml	hybrid	TRUE	Wellcome Trust	Wellcome Trust	Wellcome Trust		WT084655MS	93077
PMC4401210	25771261	10.1093/trstmh/trv012	Oxford University Press	Transactions of the Royal Society of Tropical Medicine & Hygiene	0035-9203, 1878-3503	Dengue on islands: a Bayesian approach to understanding the global ecology of dengue viruses	2000	TRUE			FALSE	cc-by	epmc_xml	hybrid	TRUE	Wellcome Trust				95066
PMC3956375	24324223	10.1093/jac/dkt473	Oxford University Press	Journal of Antimicrobial Chemotherapy	0305-7453, 1460-2091	Evolution and genetic diversity of the Spain 23F-ST81 clone causing adult invasive pneumococcal disease in Barcelona (1990-2012)	2000	TRUE			FALSE	cc-by	epmc_xml	hybrid	TRUE	Wellcome Trust				83511
PMC4501400	26085474	10.1093/trstmh/trv047	Oxford University Press	Transactions of the Royal Society of Tropical Medicine and Hygiene	0035-9203, 1878-3503	Mapping the zoonotic niche of Lassa fever in Africa	2000	TRUE			FALSE	cc-by	epmc_xml	hybrid	TRUE	Wellcome Trust				95066
PMC4447827	25820266	10.1093/trstmh/trv024	Oxford University Press	Transactions of the Royal Society of Tropical Medicine & Hygiene	0035-9203, 1878-3503	Mapping the zoonotic niche of Marburg virus disease in Africa	2000	TRUE			FALSE	cc-by	epmc_xml	hybrid	TRUE	Wellcome Trust				095066/Z/10/Z
PMC4285193	25433915	10.1093/brain/awu328	Oxford University Press	Brain	0006-8950, 1460-2156	Motion area V5/MT+ response to global motion in the absence of V1 resembles early visual cortex	2000	TRUE			FALSE	cc-by	epmc	hybrid	TRUE	Wellcome Trust				96001
PMC4511862	26072517	10.1093/brain/awv161	Oxford University Press	Brain	0006-8950, 1460-2156	Reassessing cortical reorganization in the primary sensorimotor cortex following arm amputation	2000	TRUE			FALSE	cc-by	epmc_xml	hybrid	TRUE	Wellcome Trust				HMR00360-HM00
PMC4469797	25855722	10.1093/ije/dyv029	Oxford University Press	International Journal of Epidemiology	0300-5771, 1464-3685	Sexual offending runs in families: a 37 year nationwide study	2000	TRUE			FALSE	cc-by	epmc_xml	hybrid	TRUE	Wellcome Trust				95806
PMC4240296	25348629	10.1093/brain/awu288	Oxford University Press	Brain	0006-8950, 1460-2156	The relationship of nerve fibre pathology to sensory function in entrapment neuropathy	2000	TRUE			FALSE	cc-by	epmc_xml	hybrid	TRUE	Wellcome Trust				83259
PMC4690002	26454871	10.1093/ije/dyv191	Oxford University Press	International Journal of Epidemiology	0300-5771, 1464-3685	Associations of sitting behaviours with all-cause mortality over a 16-year follow up: the Whitehall II study	2000	TRUE			FALSE	cc-by	epmc_xml	hybrid	TRUE	British Heart Foundation	MRC		Whitehall II	Whitehall II
PMC4521137	26232420	10.1093/ije/dyv141	Oxford University Press	International Journal of Epidemiology	0300-5771, 1464-3685	Cohort profile update: The British Regional Heart Study 1978-2014: 35 years follow-up of cardiovascular disease and ageing	2000	TRUE			FALSE	cc-by	epmc_xml	hybrid	TRUE	British Heart Foundation	MRC		RG/13/16/30528, PG09/024)	G1002391
PMC4671482	26297560	10.1093/brain/awv243	Oxford University Press	Brain	0006-8950, 1460-2156	Faulty cardiac repolarisation reserve in alternating hemiplegia of childhood broadens the phenotype	2000	TRUE			FALSE	cc-by	epmc_xml	hybrid	TRUE	Wellcome Trust	MRC
PMC4648198	26395965	10.1093/cvr/cvv226	Oxford University Press	Cardiovascular Research	0008-6363, 1755-3245	Inhibition of NAADP signalling on reperfusion protects the heart by preventing lethal calcium oscillations via two-pore channel 1 and opening of the mitochondrial permeability transition pore	2000	TRUE			FALSE	cc-by	epmc_xml	hybrid	TRUE	British Heart Foundation	MRC		EAA/17568	EAA/17568
PMC4511859	26205838	10.1093/brain/awv148	Oxford University Press	Brain	0006-8950, 1460-2156	Music, memory and mechanisms in Alzheimer's disease	2000	TRUE			FALSE	cc-by	epmc_xml	hybrid	TRUE	Wellcome Trust			091673/Z/10/Z
PMC4587489	26071023	10.1093/intimm/dxv038	Oxford University Press	Brain	0953-8178, 1460-2377	The expanding family of regulatory B cells	2000	TRUE			FALSE	cc-by	epmc_xml	hybrid	TRUE	Wellcome Trust			090406/Z/09/Z
PMC4363482	25557927	10.1007/s10456-014-9457-y	Springer	Angiogenesis	0969-6970, 1573-7209	A small molecule targeting ALK1 prevents Notch cooperativity and inhibits functional angiogenesis	2000.56	TRUE			FALSE	cc-by	epmc_xml	hybrid	TRUE	Wellcome Trust				092809/Z/10/Z
PMC4437774	25966344	10.1016/j.semnephrol.2015.02.002	Elsevier	Seminars in Nephrology	0270-9295, 1558-4488	Endothelin Receptors and Their Antagonists	2001.47	TRUE			FALSE	cc-by	epmc_xml	hybrid	TRUE	0	0	0	0	0	0
PMC4611856	26279056	10.1159/000438494	Karger	Cerebrovascular Diseases	1015-9770, 1421-9786	Plasma biomarkers of inflammation, endothelial function and haemostasis in cerebral small vessel disease	2001.54	TRUE			FALSE	cc-by	epmc_xml	hybrid	TRUE	Wellcome Trust	0	0	WT075611
PMC4259492	25462616	10.1016/j.socscimed.2014.10.035	Elsevier	Social Science and Medicine	0277-9536, 1873-5347	Experiences of stigma and discrimination of people with schizophrenia in India	2005	TRUE			FALSE	cc-by	publisher	hybrid	TRUE	Wellcome Trust			087020/Z/08/Z
PMC4322184	25685241	10.1007/s12551-014-0146-2	Springer	Biophysical Reviews	1867-2450, 1867-2469	Adaptations of cytoarchitecture in human dilated cardiomyopathy	2012	TRUE			FALSE	cc-by	epmc_xml	hybrid	TRUE	British Heart Foundation			PG/11/123/29317
PMC4351431	25537835	10.1007/s00125-014-3483-6	Springer	Diabetologia	0012-186X, 1432-0428	Pharmacokinetics of diluted (U20) insulin aspart compared with standard (U100) in children aged 3 to 6 years with type 1 diabetes during closed loop insulin delivery	2018.81	TRUE			FALSE	cc-by	epmc_xml	hybrid	TRUE	0	0	0	0	0	0
PMC4301722	0	10.1128/MCB.01102-14	American Society for Microbiology	Molecular and Cellular Biology	0270-7306, 1098-5549	Panspecies Small-Molecule Disruptors of Heterochromatin-Mediated Transcriptional Gene Silencing	2021.19	TRUE			FALSE	cc-by	epmc_xml	hybrid	TRUE	Wellcome Trust	0	0	095021/Z/10/Z
PMC4301718	0	10.1128/MCB.01176-14	American Society for Microbiology	Molecular and Cellular BiologyÂ	0270-7306, 1098-5549	Shugoshins: Tension-Sensitive Pericentromeric Adaptors Safeguarding Chromosome Segregation	2025.92	TRUE			FALSE	cc-by	epmc_xml	hybrid	TRUE	Wellcome Trust	0	0	090903 and 092076
PMC4537497	25366495	10.1007/s00424-014-1636-6	Springer	PflÃ¼gers Archiv	0031-6768, 1432-2013	Ubiquitin-specific protease USP2-45 acts as a molecular switch to promote ?2?-1-induced down regulation of Cav1.2 channels	2028.8	TRUE			FALSE	cc-by	epmc_xml	hybrid	TRUE	Wellcome Trust			076623/Z/05/Z
PMC4595857	25702697	10.1017/S1368980015000300	CUP	Public Health Nutrition	1368-9800, 1475-2727	Association between sucrose intake and risk of overweight and obesity in a prospective sub-cohort of the European Prospective Investigation into Cancer in Norfolk (EPIC-Norfolk)	2034	TRUE			FALSE	cc-by	epmc_xml	hybrid	TRUE	0	0	0	0	0	0
PMC4657027	25876816	10.1017/S0950268815000710	Cambridge University Press	Epidemiology and Infection	0950-2688, 1469-4409	Shrinking a large data set to identify variables associated with increased risk of Plasmodium falciparum infection in Western Kenya	2034	TRUE			FALSE	cc-by	epmc_xml	hybrid	TRUE	Wellcome Trust			085308/Z/08/Z
PMC4563702	26366006	10.1017/S0018246X14000399	Cambridge University Press	Historical Journal	0018-246X, 1469-5103	Ten Rillington Place and the Politics of Abortion in Modern Britain	2034	TRUE			FALSE	cc-by	epmc_xml	hybrid	TRUE
PMC4243378	25366989	10.1186/s13059-014-0494-z	BioMed Central	Genome Biology	1474-7596, 1474-760X	Genomic mapping of the MHC transactivator CIITA using an integrated ChIP-seq and genetical genomics approach	2034	TRUE			FALSE	cc-by	epmc_xml	oa	TRUE	Wellcome Trust				74318	90532
PMC4299533	25473855	10.1017/S0963180114000218	Cambridge University Press	Cambridge Quarterly of Healthcare Ethnics	0963-1801, 1469-2147	The harms of enhancement and the conclusive reasons view	2034	TRUE			FALSE	cc-by	epmc_xml	hybrid	TRUE	Wellcome Trust				87211	100705
PMC4462157	25827289	10.1017/S0007114515000604	Cambridge University Press	British Journal of Nutrition	0007-1145, 1475-2662	Diet quality in older age: the influence of childhood and adult socioeconomic circumstances	2034	TRUE			FALSE	cc-by	epmc_xml	hybrid	TRUE	British Heart Foundation			RG/13/16/30528
PMC4322962	0	10.18632/oncotarget.2573	Impact Journals	Oncotarget	1949-2553	The cylindromatosis gene product, CYLD, interacts with MIB2 to regulate notch signalling	2039.87	TRUE			FALSE	cc-by	epmc_xml	hybrid	TRUE	Wellcome Trust	0	0	097163/Z/11/Z	0	0
PMC4484949	26077269	10.3399/bjgp15X685705	Royal College of General Practitioners	British Journal of General Practice	0960-1643, 1478-5242	Exploring preferences for symptom management in primary care	2040	TRUE			FALSE	cc-by	epmc_xml	hybrid	TRUE	Wellcome Trust	0	0	78176	0	0
PMC4360209	25349153	10.1038/leu.2014.308	Nature Publishing Group	Leukemia	0887-6924, 1476-5551	Phenotypic heterogeneity in IGHV mutated CLL patients has prognostic impact and identifies a subset with increased sensitivity to BTK and PI3K? inhibition	2040	TRUE			FALSE	cc-by	epmc_xml	hybrid	TRUE	Leukaemia & Lymphoma Research			12049
PMC4100506	25009062	10.1098/rspb.2014.0709		Proceedings of the Royal Society B: Biological Sciences	0962-8452, 1471-2954	Social contacts and the locations in which they occur as risk factors for influenza infection	2040	TRUE			FALSE	cc-by	epmc_xml	hybrid	TRUE	Wellcome Trust			093488/Z/10/Z
PMC4375405	25062958	10.1093/cvr/cvu173	Oxford University Press	Cardiovascular Research	0008-6363, 1755-3245	Bidirectional cross-regulation between the endothelial nitric oxide synthase and ÃŸ-catenin signalling pathways	2040	TRUE			FALSE	cc-by	epmc_xml	hybrid	TRUE	British Heart Foundation			PG/12/16/29943
PMC4240406	25117473	10.1093/ehjci/jeu142	Oxford University Press	European Heart Journal - Cardiovascular Imaging	2047-2404, 2047-2412	The microvascular effects of insulin resistance and diabetes on cardiac structure, function, and perfusion: a cardiovascular magnetic resonance study	2040	TRUE			FALSE	cc-by	epmc_xml	hybrid	TRUE	British Heart Foundation	0	0	FS/10/62/28409	0	0
PMC4567786	0	10.1136/openhrt-2015-000302	BMJ	Open Heart	2053-3624	Effect of catheter ablation on quality of life in patients with atrial fibrillation and its correlation with arrhythmia outcome	2040	TRUE			FALSE	cc-by	epmc_xml	oa	TRUE	British Heart Foundation	0	0	FS/11/47/28867	0	0
PMC4308982	25624520	10.1098/rsta.2013.0155	Royal Society	Philosophical Transactions A	1364-503X, 1471-2962	Understanding cell signalling systems: paving the way for new therapies	2040	TRUE			FALSE	cc-by	epmc_xml	hybrid	TRUE	Wellcome Trust				90532
PMC4382520	25280908	10.1016/j.neubiorev.2014.09.016	Elsevier	Neuroscience and Biobehavioral Reviews	0149-7634, 1873-7528	In search of a recognition memory engram	2043.88	TRUE			FALSE	cc-by	epmc_xml	hybrid	TRUE	Wellcome Trust			WT087855/z/08/z
PMC4359099	25475372	10.1016/j.molonc.2014.10.015	Elsevier	Molecular Oncology	1574-7891, 1878-0261	Protein arginine methyltransferase 5 is a key regulator of the MYCN oncoprotein in neuroblastoma cells	2043.88	TRUE			FALSE	cc-by	epmc_xml	hybrid	TRUE	Cancer Research UK			C20791/A12743
PMC4169665	25034228	10.1016/j.mimet.2014.07.012		Journal of microbiological methods	0167-7012, 1872-8359	An in vivo crosslinking system for identifying mycobacterial protein-protein interactions	2048.48	TRUE			FALSE	cc-by	publisher	hybrid	TRUE	Wellcome Trust			086087/Z/08/Z
PMC4365271	25516094	10.1007/s10143-014-0602-2		Neurosurgical Review	0344-5607, 1437-2320	da Vinci Robot-Assisted Keyhole Neurosurgery: A Cadaver Study on Feasibility and Safety	2048.75	TRUE			FALSE	cc-by	epmc_xml	hybrid	TRUE	Wellcome Trust			100564/Z/12/Z
PMC4316173	25287128	10.1016/j.bbagrm.2014.09.016		Biochimica et biophysica acta	0006-3002	FOXM1: An emerging master regulator of DNA damage response and genotoxic agent resistance	2048.98	TRUE			FALSE	cc-by	epmc_xml	hybrid	TRUE	Breast Cancer Campaign; Royal Thai Embassy; Cancer Research UK			2012MayPR070; C37/A12011
PMC4306732	25312698	10.1007/s10875-014-0103-7		Journal of clinical immunology	0271-9142, 1573-2592	Interaction of pattern recognition receptors with Mycobacterium tuberculosis	2050.29	TRUE			FALSE	cc-by	epmc_xml	hybrid	TRUE	Medical Research Council (MRC); Wellcome Trust			083567/Z/07/Z; 093080/Z/10/Z
PMC4244562	25352341	10.1007/s10555-014-9513-5	Springer	Cancer Metastasis Review	0167-7659, 1573-7233	Towards an understanding of the structure and function of MTA1	2050.8	TRUE			FALSE	cc-by	epmc_xml	hybrid	TRUE	Wellcome Trust	0	0	The molecular functioning of HDAC/co-repressor complexes Wellcome Trust100237	0	0
PMC4326660	25398200	10.1007/s00281-014-0463-3	Springer	Seminars in Immunopathology	1863-2297, 1863-2300	Novel insights into host-fungal pathogen interactions derived from live-cell imaging	2053.33	TRUE			FALSE	cc-by	epmc_xml	hybrid	TRUE	Wellcome	0	0	080088, 086827, 075470, 099215, 097377, 101873	0	0
PMC4382327	25488690	10.1016/j.jaci.2014.10.035	Elsevier	Journal of Allergy and Clinical Immunology	0091-6749, 1097-6825	Maternal selenium status in pregnancy, glutathione peroxidase 4 genotype and childhood asthma	2055.71	TRUE			FALSE	cc-by	epmc_xml	hybrid	TRUE	Wellcome Trust			102215/2/13/2
PMC4410301	25281389	10.1016/j.eururo.2014.09.018	Elsevier	European Urology	0302-2838, 1873-7560	Focal Therapy: Patients, Interventions and Outcomes. A Report from a Consensus Meeting	2056.31	TRUE			FALSE	cc-by	epmc_xml	hybrid	TRUE	Wellcome Trust			HICF-T4-310
PMC4286626	25138165	10.1007/s10439-014-1095-4		Annals of biomedical engineering	0090-6964, 1573-9686	Change of Direction in the Biomechanics of Atherosclerosis	2057.04	TRUE			FALSE	cc-by	epmc_xml	hybrid	TRUE	British Heart Foundation			RG/11/5/28743
PMC4489114	26137966	10.1186/s12916-015-0392-6	BioMed Central	BMC Medicine	1741-7015	Annexin A1 expression in a pooled breast cancer series: association with tumor subtypes and prognosis	2058	TRUE			FALSE	cc-by	epmc_xml	oa	TRUE	0	0	0	0	0	0
PMC4537538	26275908	10.1186/s12916-015-0432-2	BioMed Central	BioMed Central Medicine	1741-7015	Rapid microbiological screening for tuberculosis in HIV-positive patients on the first day of acute hospital admission by systematic testing of uring samples using Xpert MTB/RIF: a prospective cohort in South Africa.	2058	TRUE			FALSE	cc-by	epmc_xml	oa	TRUE	Wellcome Trust			WT088590
PMC4470065	26048371	10.1186/s12916-015-0381-9	BioMed Central	BioMed Central Medicine	1741-7015	Risk of tuberculosis in patients with diabetes population based cohorts study using the UK clinical practice research datalink.	2058	TRUE			FALSE	cc-by	epmc_xml	oa	TRUE	Wellcome Trust			WT092691/Z/10/Z
PMC4266539	25310910	10.1016/j.ejphar.2014.10.003		European journal of pharmacology	0014-2999, 1879-0712	Role of mitogen-activated protein kinase phosphatase-1 in corticosteroid insensitivity of chronic oxidant lung injury	2059.42	TRUE			FALSE	cc-by	publisher	hybrid	TRUE	Wellcome Trust			083905/Z/07/Z
PMC4376379	25455480	10.1016/j.socscimed.2014.10.016	Elsevier	Social Science and Medicine	0277-9536, 1873-5347	Everyday drug diversions: a qualitative study of the illicit exchange and non-medical use of prescription stimulants on a university campus	2059.97	TRUE			FALSE	cc-by	epmc_xml	hybrid	TRUE	Wellcome Trust			079529/Z/06/Z
PMC4418747	25312756	10.1016/j.jaci.2014.08.039	Elsevier	Journal of Allergy and Clinical Immunology	0091-6749, 1097-6825	Patients with Griscelli syndrome and normal pigmentation identify RAB27A mutations that selectively disrupt MUNC13-4 binding	2060.7	TRUE			FALSE	cc-by	epmc_xml	hybrid	TRUE	0	0	0	0	0	0
PMC4594050	26343512	10.1017/s000711451500269x	CUP	British Journal of Nutrition	0007-1145, 1475-2662	The cross-sectional association between snacking behaviour and measures of adiposity: The Fenland Study, UK	2061.07	TRUE			FALSE	cc-by	epmc_xml	hybrid	TRUE	0	0	0	0	0	0
PMC4376382	25533871	10.1016/j.socscimed.2014.12.007	Elsevier	Social Science and Medicine	0277-9536, 1873-5347	Drugs, Cancer and End-of-Life Care: A Case Study of Pharmaceuticalization?	2061.89	TRUE			FALSE	cc-by	epmc_xml	hybrid	TRUE	Wellcome Trust			WT082853MA
PMC4239791	25138912	10.1007/s00221-014-4067-x	Springer	Experimental Brain Research	0014-4819, 1432-1106	Vestibular evoked potentials (VsEPs) of cortical origin produced by impulsive acceleration applied at the nasion	2062.69	TRUE			FALSE	cc-by	epmc_xml	hybrid	TRUE
PMC4331651	25450810	10.1016/j.bbamem.2014.10.018	Elsevier	Biochimica et Biophysica Acta (BBA) - Biomembranes	0006-3002	The use of SMALPs as a novel membrane protein scaffold for structure study by negative stain electron microscopy	2063.61	TRUE			FALSE	cc-by	epmc_xml	hybrid	TRUE	Wellcome Trust	MRC	BBSRC	009752/Z/12/Z	G1000567	BB/J017310/1
PMC4656707	25520257	10.1007/s11948-014-9617-x	Springer	Science and Engineering Ethics	1353-3452, 1471-5546	Printing Insecurity? The Security Implications of 3D-printing of Weapons	2064.06	TRUE			FALSE	cc-by	epmc_xml	hybrid	TRUE
PMC4424375	25515860	10.1007/s00439-014-1514-5	Springer	Human Genetics	0340-6717, 1432-1203	Heritability and genome-wide analyses of problematic peer relationships during childhood and adolescence	2064.11	TRUE			FALSE	cc-by	epmc_xml	hybrid	TRUE	Wellcome Trust			WT092731/Z/10/Z
PMC4600476	26156636	10.1007/s00213-015-4009-8	Springer	Psychopharmacology	0033-3158, 1432-2072	Motivational assessment of mice using the touchscreen operant testing system: effects of dopaminergic drugs	2065.73	TRUE			FALSE	cc-by	epmc_xml	hybrid	TRUE	0	0	0	0	0	0
PMC4174329	25179120	10.1007/s11017-014-9303-7	Springer	Theoretical Medicine and Bioethics	1386-7415, 1573-0980	What is the harm in harmful conception? On threshold harms in non-identity cases	2065.97	TRUE			FALSE	cc-by	epmc_xml	hybrid	TRUE
PMC4379919	25677713	10.1017/S000711451400419X	Cambridge University Press	British Journal of Nutrition	0007-1145, 1475-2662	Effects of a food-based intervention on markers of micronutrient status among Indian women of low socio-economic status	2066.33	TRUE			FALSE	cc-by	epmc_xml	hybrid	TRUE	Wellcome Trust			074048/Z/05/Z
PMC4291520	25487306	10.1007/s00439-014-1515-4	Springer	Human Genetics	0340-6717, 1432-1203	Candidate locus analysis of the TERT-CLPTM1L cancer risk region on chromosome 5p15 identifies multiple independent variants associated with endometrial cancer risk	2068.8	TRUE			FALSE	cc-by	epmc_xml	hybrid	TRUE	0	0	0	0	0	0
PMC4503825	25480570	10.1007/s00415-014-7598-y	Springer	Journal of Neurology	0340-5354, 1432-1459	Diagnosis, investigation and management of hereditary spastic paraplegias in the era of next generation sequencing	2068.8	TRUE			FALSE	cc-by	epmc_xml	hybrid	TRUE	0	0	0	0	0	0
PMC4471880	26113753	10.1111/mila.12082	Wiley	Mind & Language	0268-1064, 1468-0017	Conscious Control over Action	2070.37	TRUE			FALSE	cc-by	epmc_xml	hybrid	TRUE	Wellcome Trust				086041/Z/08/Z
PMC4308023	25642100	10.1016/j.isprsjprs.2014.10.001	Elsevier	ISPRS Journal of Photogrammetry and Remote Sensing	0924-2716, 1872-8235	An effective approach for gap filling continental scale remotely sensed time-series	2070.68	TRUE			FALSE	cc-by	publisher	hybrid	TRUE	Wellcome Trust				95066
PMC4505773	25953118	10.1089/aid.2015.0035	Mary Ann Liebert	AIDS Research and Human Retroviruses	0889-2229, 1931-8405	Intrapatient Evolutionary Dynamics of Human Immunodeficiency Virus Type 1 in Individuals Undergoing Alternative Treatment Strategies with Reverse Transcriptase Inhibitors.	2070.8	TRUE			FALSE	cc-by	epmc_xml	hybrid	TRUE	Wellcome Trust			WT084344
PMC4575379	25367317	10.1007/s00394-014-0789-6	Springer	European Journal of Nutrition	1436-6207, 1436-6215	Association of daily coffee and tea consumption and metabolic syndrome: results from the Polish arm of the HAPIEE study	2071.81	TRUE			FALSE	cc-by	epmc_xml	hybrid	TRUE	Wellcome Trust			064947/Z/01/Z; 081081/Z/06/Z
PMC4358838	25461811	10.1016/j.ymeth.2014.11.005	Elsevier	Methods	1046-2023, 1095-9130	Methods to analyze SNARE-dependent vesicular fusion events that regulate autophagosome biogenesis	2073.86	TRUE			FALSE	cc-by	epmc_xml	hybrid	TRUE	0	0	0	0	0	0
[truncated: 1,558 more rows]
